# Supplementary material
Source: PubMed Central journal article supplement (PMC2976583)

## Supporting Information

### A fluorous-tagged ‘safety catch’ linker for the synthesis of heterocyclic small molecules

Catherine O’Leary-Steele, Christopher Cordier, Jerome Hayes, Stuart Warriner and Adam Nelson\*

#### General Experimental

All non-aqueous reactions were performed under an atmosphere of nitrogen. Water-sensitive reactions were performed in oven-dried glassware, cooled under nitrogen before use, or flame-dried, and cooled, under vacuum if stated. Solvents were removed under reduced pressure using either a Büchi rotary evaporator and a Vacuubrand PC2001 Vario diaphragm pump, or a Genevac HT-4 evaporation system. Solvents were distilled before use when necessary and possible according to scale. Tetrahydrofuran was freshly distilled from sodium, using benzophenone as a self-indicator. Dichloromethane was freshly distilled from calcium hydride. Triethylamine was purified by refluxing with potassium hydroxide and potassium carbonate, followed by distillation under nitrogen, and was stored over potassium hydroxide. Ether refers to diethyl ether and petrol refers to petroleum spirit (b.p. 40-60 °C). Commercially available starting materials were obtained from Sigma–Aldrich or Alfa Aesar.

Flash column chromatography was carried out using silica (35-70 µm particles), with crude reaction mixtures loaded in dichloromethane or the initial solvent system, or pre-absorbed. Flash column chromatography was carried out using either hand pumps or compressed air, by a variation of the procedure described by Still, Kahn and Mitra.<sup>1</sup> Thin layer chromatography was carried out on commercially available pre-coated glass or aluminium plates (Merck silica 2 8 8 0 Kieselgel 60F254). Analytical HPLC was performed using either a Thermo Hypersil–Keystone achiral column (250 × 4.6 mm 8 1 Hyperprep HSC18), an XTerra<sup>®</sup> analytical HPLC column, a Jupiter<sup>®</sup> analytical column or an Ultron chiral column (150 × 4.6 mm ES-OVM) with a Dionex P580 pump and a PDA-100 UV detector at wavelengths between 200 and 250 nm. The purity of fluorous-tagged products which were purified by Fluorous-Solid Phase Extraction (F-SPE) alone was determined using the Jupiter<sup>®</sup> column eluting with either 75→95% MeCN–water. Fluorous-Solid Phase Extraction (F-SPE) was carried out using pre-packed FluoroFlash<sup>®</sup> cartridges purchased from Fluorous Technologies Inc. Cartridges were washed extensively with *N,N*-dimethylformamide, and were pre-conditioned with 8:2 methanol–water. Crude reaction mixtures were loaded onto cartridges using either *N,N*-dimethylformamide or dichloromethane and eluted using 8:2 methanol–

water (a fluorophobic eluent) followed by methanol (a fluorophilic solvent) using compressed air in a manner similar to that described by Curran.<sup>2,3</sup>

Proton and carbon NMR spectra were recorded on a Bruker Avance 500, Avance DPX300 or DRX500 spectrophotometer with an internal deuterium lock. Carbon NMR spectra were recorded with composite pulse decoupling using the waltz 16 pulse sequence. DEPT, COSY, HMQC, HMBC, TOCSY or NOESY pulse sequences were used to aid the assignment of spectra. Chemical shifts are quoted in parts per million downfield of tetramethylsilane, and coupling constants ( $J$ ) are given in Hz. NMR spectra were recorded at 300 K unless otherwise stated.

Infra-red spectra were recorded using a Perkin–Elmer Spectrum One FT-IR spectrophotometer. Spectra of solids and foams were recorded using solid state golden gate probes whilst spectra of oils were performed neat on sodium chloride discs. Melting points were recorded on a Reichert hot stage microscope and are uncorrected. Nominal mass spectrometry was routinely performed on a Waters-Micromass ZMD spectrometer using electrospray (+) ionization. Nominal and accurate mass spectrometry using electrospray ionisation was carried out by staff in the School of Chemistry using either a Micromass LCT-KA111 or Bruker MicroTOF mass spectrometer. Field Desorption ionisation mass spectra were acquired on a Waters-Micromass GCT premier spectrometer equipped with a Linden LIFDI probe. Optical activity measurements were recorded at room temperature unless otherwise stated; units for  $[\alpha]_D$  are  $10^{-1} \text{ deg cm}^2 \text{ g}^{-1}$  and are omitted.

## General Procedures

### A. Silaketal formation using diisopropylsilyl ethers

*N*-Bromosuccinimide (3 eq.) was added to a stirred solution of the silyl ether (3.5 eq.) in dichloromethane (0.2 M) at 0 °C. The reaction mixture was allowed to warm to room temperature, stirred for 15 mins and cooled to 0 °C. The alcohol (1 eq.) and the *N,N*-dimethylaminopyridine (0.5 eq.) were added as a solution in triethylamine (15 eq.), rinsing the vessel containing the alcohol with dichloromethane (reaction volume) and adding this wash to the reaction mixture. The suspension was allowed to warm to room temperature and was stirred until completion was indicated by TLC.

### B. Fukuyama–Mitsunobu

Diethyl azodicarboxylate or di-*tert*butyl azodicarboxylate (4 eq.) was added dropwise/portionwise to a stirred solution of the alcohol (1 eq.), the amine (4 eq) and triphenylphosphine (4 eq.) in tetrahydrofuran (0.05 M-0.2 M) at 0 °C. The solution was allowed to warm to room temperature and stirred until completion was indicated by TLC. The reaction mixture was then concentrated under reduced pressure to give the crude product.

### C. Olefin metathesis using Grubbs' catalysts

The olefin metathesis catalyst **G I** or **HG II** (5 mol%) was added portionwise to a stirred solution of the substrate (1 eq.) in refluxing dichloromethane (1-4 mM) and the reaction mixture was stirred at reflux until completion was indicated by TLC with additional catalyst added, if necessary, periodically. The reaction mixture was then cooled to room temperature and tris(hydroxymethyl)phosphine (86 eq. relative to the catalyst) and triethylamine (*ca.* 10 eq.) added, stirred for a minimum of 1 hour, and silica (5 × amount of phosphine) added and the reaction mixture stirred for a minimum of 1 hour. The reaction mixture was filtered through a pad of Celite, washing with ethyl acetate, and the solvent removed under reduced pressure to give the crude product.

### D. Cleavage from the fluororous-tagged linker

Trifluoroacetic acid was added to a solution of the substrate in dichloromethane (0.2-0.4 mM in 3% TFA/DCM) and the reaction mixture was stirred at room temperature for 16 hours. The solution was concentrated under reduced pressure to give the crude product.

## Unsuccessful metathesis substrates

The following metathesis substrates were prepared as part of the investigation. However, metathesis did not lead to clean release of products from the fluororous-tagged linker.

### *N*-{[(2*S*,5*R*,6*S*)-5-{2-[(*N*-{3,3,4,4,5,5,6,6,7,7,8,8,9,9,10,10,10-heptafluorodecyl}-4-methylsulfonamido)methyl]allyloxy}-6-methoxy-5,6-dihydro-2*H*-pyran-2-yl)methyl]-2-nitro-*N*-(pent-4'-enyl)benzenesulfonamide **S1**

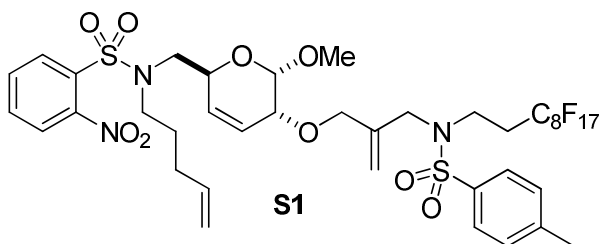

Following general procedure **B**, diethyl azodicarboxylate (88  $\mu$ L, 0.48 mmol), sulfonamide **20** (117 mg, 0.48 mmol) and alcohol **1** (100 mg, 0.12 mmol) gave a crude product after 3 hours. Purification by Fluorous Solid Phase Extraction; 5 g cartridge, loading with <1 mL DMF, eluting with 80:20 MeOH–H<sub>2</sub>O followed by MeOH gave the fluororous fraction, *sulfonamide S1* (125 mg, 96%, 80% purity by HPLC) as a colourless oil,  $R_f$  0.35 (60:40 petrol–EtOAc);  $\delta_H$  (500 MHz, CDCl<sub>3</sub>) 8.05 (1H, dd,  $J$  7.4 and 1.7, nosyl 3-H), 7.72–7.62 (5H, m, Ar), 7.34 (2H, d,  $J$  8.1, tosyl 3-H and 5-H), 5.81–5.67 (3H, m, 3-H, 4-H and 4'-H), 5.30 (1H, br. s, NCH<sub>2</sub>C=CH<sub>A</sub>), 5.14 (1H, br. s, NCH<sub>2</sub>C=CH<sub>B</sub>), 4.98 (1H, dd,  $J$  17.1 and 1.5, 5'-H<sub>A</sub>), 4.95 (1H, dd,  $J$  10.3 and 1.5, 5'-H<sub>B</sub>), 4.80 (1H, d,  $J$  3.9, 6-H), 4.32–4.27 (1H, m, 2-H), 4.04–4.00 (3H, m, 5-H and 5-COCH<sub>2</sub>), 3.83–3.75 (2H, m, NCH<sub>2</sub>CCH<sub>2</sub>), 3.56 (1H, dd,  $J$  15.0 and 3.2, 2-CCH<sub>A</sub>), 3.50 (1H, dd,  $J$  15.0 and 3.6, 2-CCH<sub>B</sub>), 3.43–3.32 (7H, m, OMe, CF<sub>2</sub>CH<sub>2</sub>CH<sub>2</sub> and 1'-H), 2.44 (3H, s, tosyl Me), 2.43–2.31 (2H, m, CF<sub>2</sub>CH<sub>2</sub>), 2.04–1.99 (2H, m, 3'-H) and 1.68 (2H, quint.  $J$  7.5, 2'-H);  $\delta_C$  (75 MHz, CDCl<sub>3</sub>) 148.4 (nosyl 2-C), 144.4 (tosyl 4-C), 140.9 (NCH<sub>2</sub>CCH<sub>2</sub>), 136.1 (tosyl 1-C), 134.3 (3'-C), 134.2 (nosyl 4-C), 133.9 (nosyl 1-C), 132.0, 131.5 (nosyl 3-C and 6-C), 130.3 (tosyl 3-C and 5-C), 127.64, 127.61 (4-C and tosyl 2-C and 6-C), 125.9 (3-C), 124.5 (nosyl 5-C), 117.5 (NCH<sub>2</sub>C=CH<sub>2</sub>), 115.7 (5'-C), 97.1 (6-C), 72.1, (5-C), 69.7 (5-COCH<sub>2</sub>), 68.2 (2-C), 56.2 (OMe), 52.1 (NCH<sub>2</sub>CCH<sub>2</sub>), 50.7 (1'-C), 48.6 (2-CCH<sub>2</sub>), 40.8 (CF<sub>2</sub>CH<sub>2</sub>CH<sub>2</sub>), 31.0 (t,  $^2J_{C-F}$  21.8, CF<sub>2</sub>CH<sub>2</sub>), 28.5 (3'-C), 27.2 (2'-C) and 21.9 (tosyl Me);  $\nu_{max}/cm^{-1}$  (film) 2917, 2849, 1736, 1577, 1542 and 1464;  $m/z$  (ESI<sup>+</sup>) 1104.2 ([M + Na]<sup>+</sup> 100%); found  $MNa^+$  1104.1839, C<sub>39</sub>H<sub>40</sub>F<sub>17</sub>N<sub>3</sub>O<sub>9</sub>S<sub>2</sub> requires  $MNa$  1104.1832.

***N*-(Dec-9-enyl)-*N*-[[(2'*S*,5'*R*,6'*S*)-5'-[2-[[*N*-(3,3,4,4,5,5,6,6,7,7,8,8,9,10,10,10-heptafluorodecyl)-4-methylphenylsulfonamido]methyl]allyloxy]-6'-methoxy-5',6'-dihydro-2*H*-pyran-2'-yl)methyl]-2-nitrobenzenesulfonamide **S2****

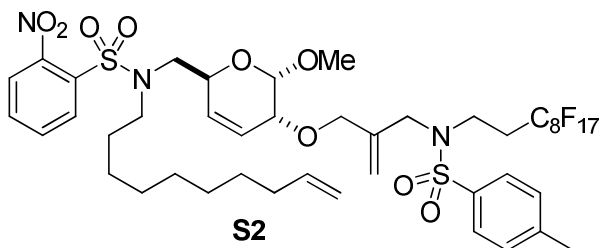

Following general procedure **B**, diethyl azodicarboxylate (72  $\mu$ L, 0.39 mmol), sulfonamide **18** (100 mg, 0.10 mmol) and dec-9-en-1-ol (73  $\mu$ L, 0.39 mmol) gave the crude product after 3 hours. Purification by Fluorous Solid Phase Extraction; 2 g cartridge, loading with <200  $\mu$ L dichloromethane, eluting with 80:20 MeOH–H<sub>2</sub>O followed by MeOH gave the fluorous fraction, the *sulfonamide S2* (113 mg, 99%, 83% purity by HPLC) as a colourless foam,  $R_f$  0.90 (50:50 petrol–EtOAc);  $\delta_H$  (500 MHz, CDCl<sub>3</sub>) 8.07-8.03 (1H, m, nosyl 3-H), 7.72-7.61 (5H, m, Ar), 7.34 (2H, ddt,  $J$  8.0, tosyl 3-H and 5-H), 5.80 (1H, ddt,  $J$  17.0, 10.2 and 6.9, 9-H), 5.76-5.71 (2H, m, 3'-H and 4'-H), 5.30 (1H, br. s, 5'-COCH<sub>2</sub>=CH<sub>A</sub>), 5.14 (1H, br. s, 5'-COCH<sub>2</sub>=CH<sub>B</sub>), 4.98 (1H, app. dq,  $J$  17.0 and 1.4, 10-H<sub>A</sub>), 4.92 (1H, app. dq,  $J$  10.2 and 1.4, 10-H<sub>B</sub>), 4.79 (1H, br. d,  $J$  3.6, 6'-H), 4.32-4.27 (1H, m, 2'-H), 4.04-4.00 (3H, m, 5'-H and 5'-COCH<sub>2</sub>), 3.81 (1H, d,  $J$  15.0, NCH<sub>A</sub>CCH<sub>2</sub>), 3.78 (1H, d,  $J$  15.0, NCH<sub>B</sub>CCH<sub>2</sub>), 3.55 (1H, dd,  $J$  15.3 and 3.1, 2'-CCH<sub>A</sub>), 3.51-3.44 (2H, m, 1-H), 3.43-3.35 (5H, m, CF<sub>2</sub>CH<sub>2</sub>CH<sub>2</sub> and OMe), 3.34 (1H, dd,  $J$  15.3 and 7.5, 2'-CCH<sub>B</sub>), 2.44 (3H, s, tosyl Me), 2.43-2.30 (2H, m, CF<sub>2</sub>CH<sub>2</sub>), 2.02 (2H, app. q,  $J$  6.9, 8-H), 1.58-1.51 (2H, m, 2-H), 1.38-1.30 (2H, m, 7-H), 1.30-1.16 (8H, m, 3-H, 4-H, 5-H and 6-H);  $\delta_C$  (75 MHz, CDCl<sub>3</sub>) 148.4 (nosyl 2-C), 144.4 (tosyl 4-C), 140.9 (5'-COCH<sub>2</sub>C), 139.5 (9-C), 136.1 (tosyl 1-C), 134.4 (nosyl 1-C), 133.8 (nosyl 6-C), 131.9 (nosyl 3-C), 131.4 (nosyl 4-C), 130.4 (tosyl 3-C and 5-C), 127.62 (3'-C), 127.57 (tosyl 2-C and 6-C), 125.8 (4'-C), 124.5 (nosyl 5-C), 117.5 (5'-COCH<sub>2</sub>C=CH<sub>2</sub>), 114.5 (10-C), 97.1 (6'-C), 72.1 (5'-C), 69.7 (5'-COCH<sub>2</sub>), 68.1 (2'-C), 56.2 (OMe), 52.1 (NCH<sub>2</sub>CCH<sub>2</sub>), 50.5 (2'-CCH<sub>2</sub>), 48.9 (1-C), 40.8 (CF<sub>2</sub>CH<sub>2</sub>CH<sub>2</sub>), 34.1 (8-C), 31.0 (CF<sub>2</sub>CH<sub>2</sub>), 29.7, 29.5, 29.3, 29.2, 28.0 and 26.9 (2-C, 3-C, 4-C, 5-C, 6-C and 7-C) and 21.8 (tosyl Me);  $\nu_{max}/cm^{-1}$  (film) 3077, 2929, 2857, 2254, 1732, 1597, 1545, 1455 and 1440;  $m/z$  (ESI<sup>+</sup>) 1169.3 ([M + NH<sub>4</sub>]<sup>+</sup> 100%), 1174.3 ([M + Na]<sup>+</sup> 95%); found MNa<sup>+</sup> 1174.2564, C<sub>44</sub>H<sub>50</sub>F<sub>17</sub>N<sub>3</sub>O<sub>9</sub>S<sub>2</sub> requires MNa 1174.2609.

**[(2*S*,5*R*,6*S*)-5-{2-[[*N*-(3,3,4,4,5,5,6,6,7,7,8,8,9,9,10,10,10-heptafluorodecyl)-4-methylphenylsulfonamido]methyl]allyloxy}-6-methoxy-5,6-dihydro-2*H*-pyran-2-yl]methyl pent-4'-enoate **S3****

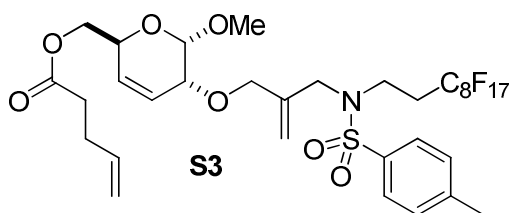

Alcohol **1** (100 mg, 0.12 mmol) was added to a stirred solution of pent-4-enoic acid (24 mg, 0.24 mmol), ethyl-3-(3-dimethylaminopropyl)-carbodiimide (46 mg, 0.24 mmol) and 4-dimethylaminopyridine (2 mg, 0.012 mmol) in dichloromethane (1 mL). The reaction mixture was stirred for 18 hours and subsequently concentrated *in vacuo*, to give a crude product that was purified by Fluorous Solid Phase Extraction; 2 g cartridge loading with <400  $\mu$ L DMF, eluting with 80:20 MeOH–H<sub>2</sub>O followed by MeOH to give the fluorous fraction, *sulfonamide S3* (98 mg, 89%, >95% purity by 500 MHz <sup>1</sup>H NMR) as a colourless oil, *R<sub>f</sub>* 0.24 (10:4 petrol–EtOAc);  $\delta_{\text{H}}$  (500 MHz, CDCl<sub>3</sub>) 7.70 (2H, d, *J* 8.1, tosyl 2-H and 6-H), 7.33 (2H, d, *J* 8.1, tosyl 3-H and 5-H), 5.84 (1H, ddt, 4'-H), 5.85-5.79 (1H, m, 3-H), 5.73 (1H, dt, *J* 10.7 and 1.7, 4-H), 5.31 (1H, br. s, NCH<sub>2</sub>C=CH<sub>A</sub>), 5.14 (br. s, NCH<sub>2</sub>C=CH<sub>B</sub>), 5.07 (1H, app. dq, *J* 17.1 and 1.7, 5'-H<sub>A</sub>), 5.01 (1H, app. dq, *J* 10.3 and 1.7, 5'-H<sub>B</sub>), 5.00-4.98 (1H, m, 6-H), 4.38-4.31 (1H, m, 2-H), 4.18 (2H, dd, *J* 5.6 and 4.7, 2-CCH<sub>2</sub>), 4.10-4.07 (1H, m, 5-H), 4.05 (2H, s, 5-COCH<sub>2</sub>), 3.84 (1H, d, *J* 15.0, NCH<sub>A</sub>CCH<sub>2</sub>), 3.77 (1H, d, *J* 15.0, NCH<sub>B</sub>CCH<sub>2</sub>), 3.51 (3H, s, OMe), 3.40-3.36 (2H, m, CF<sub>2</sub>CH<sub>2</sub>CH<sub>2</sub>), 2.48-2.44 (2H, m, 2'-H), 2.44 (3H, s, 4'''-CCH<sub>3</sub>), 2.43-2.36 (4H, m, CF<sub>2</sub>CH<sub>2</sub> and 3'-H);  $\delta_{\text{C}}$  (75 MHz, CDCl<sub>3</sub>) 173.3 (1'-C), 144.4 (tosyl 4-C), 140.9 (NCH<sub>2</sub>CCH<sub>2</sub>), 136.9 (4'-C), 136.1 (tosyl 1-C), 130.3 (tosyl 3-C and 5-C), 127.6 (tosyl 2-C and 6-C), 126.8 (4-C), 126.2 (3-C), 117.5 (NCH<sub>2</sub>C=CH<sub>2</sub>), 116.0 (5'''-C), 97.2 (6-C), 72.1 (5-C), 69.7 (5-COCH<sub>2</sub>), 67.5 (2-C), 65.8 (2-CCH<sub>2</sub>), 56.3 (OMe), 52.0 (NCH<sub>2</sub>CCH<sub>2</sub>), 40.8 (CF<sub>2</sub>CH<sub>2</sub>CH<sub>2</sub>), 33.8 (2'-C), 31.0 (t, <sup>2</sup>*J*<sub>C-F</sub> 21.8, CF<sub>2</sub>CH<sub>2</sub>), 29.2 (3'-C), 21.9 (tosyl Me);  $\nu_{\text{max}}$ /cm<sup>-1</sup> (film); 3081, 2925, 2859, 1739, 1642, 598 and 1452; *m/z* (ESI<sup>+</sup>) 929.2 ([M + NH<sub>4</sub>]<sup>+</sup> 100%); found MNa<sup>+</sup> 934.1686, C<sub>33</sub>H<sub>34</sub>F<sub>17</sub>N<sub>3</sub>O<sub>7</sub>S requires *MNa* 934.1677.

***N*-(2-[[*(2S,3R,6S)*-6-[(diisopropyl(*R*)-1'phenylallyloxy)silyloxy]methyl]-2-methoxy-3,6-dihydro-2*H*-pyran-3-yloxy]methyl]allyl)-*N*-(3,3,4,4,5,5,6,6,7,7,8,8,9,9,10,10,10-heptafluorodecyl)-4-methylbenzenesulfonamide **S4****

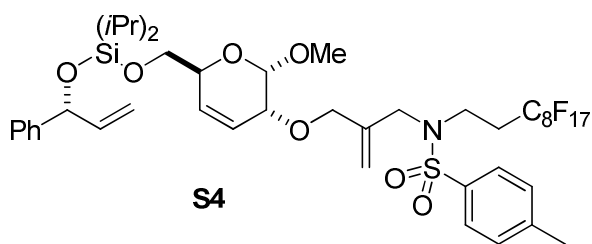

Following general procedure A, (*R*)-diisopropyl(1-phenylallyloxy)silane (105 mg, 0.42 mmol) and alcohol **1** (100 mg, 0.12 mol) were stirred for 16 hours after which time methanol (2 mL) was added and the solution was concentrated under reduced pressure. The residue was then suspended in pentane (5 mL), filtered and concentrated under reduced pressure to give a crude product which was purified by Fluorous Solid Phase Extraction; 2 g cartridge, loading with <400  $\mu$ L DMF, eluting with 80:20 MeOH–H<sub>2</sub>O followed by MeOH to give the fluorous fraction, *silaketal* **S4** (102 mg, 79%, >95% purity by <sup>1</sup>H NMR spectroscopy) as a colourless oil, *R<sub>f</sub>* 0.63 (80:20 petrol–EtOAc);  $\delta_{\text{H}}$  (500 MHz, CDCl<sub>3</sub>) 7.70 (2H, d, *J* 8.1, tosyl 2-H and 6-H), 7.37–7.30 (6H, m, tosyl 3-H and 5-H and phenyl 2-H, 3-H, 5-H and 6-H), 7.23 (1H, app tt, *J* 7.3 and 1.5, phenyl 4-H), 5.96 (1H, ddd, *J* 17.1, 10.3 and 5.6, 2'-H), 5.73 (1H, app d, *J* 10.7, 4-H), 5.69 (1H, app d, *J* 10.7, 5-H), 5.36 (1H, d, *J* 5.6, 1'-H), 5.31 (1H, br s, NCH<sub>2</sub>C=CH<sub>A</sub>), 5.30 (1H, app dt, *J* 17.1 and 1.3, 3'-H<sub>A</sub>), 5.13 (1H, br s, NCH<sub>2</sub>C=CH<sub>B</sub>), 5.06 (1H, app dt, *J* 10.3 and 1.3, 3'-H<sub>B</sub>), 4.93–4.91 (1H, m, 2-H), 4.10–4.04 (1H, m, 6-H), 4.02 (2H, s, 3-COCH<sub>2</sub>), 3.82 (1H, d, *J* 15.0, NCH<sub>A</sub>CCH<sub>2</sub>), 3.78 (1H, d, *J* 15.0, NCH<sub>B</sub>CCH<sub>2</sub>), 3.72 (1H, dd, *J* 10.3 and 6.0, 6-CCH<sub>A</sub>), 3.54 (1H, dd, *J* 10.3 and 6.0, 6-CCH<sub>B</sub>), 3.50–3.48 (1H, m, 3-H), 3.48 (3H, s, OMe), 3.40–4.35 (2H, m, CF<sub>2</sub>CH<sub>2</sub>CH<sub>2</sub>), 2.44 (3H, s, tosyl Me), 2.42–2.33 (2H, m, CF<sub>2</sub>CH<sub>2</sub>) and 1.09–0.96 (14H, m, *iPr*);  $\delta_{\text{C}}$  (75 MHz, CDCl<sub>3</sub>) 144.2 (tosyl 4-C), 141.7 (phenyl 2-C and 6-C), 140.8 (NCH<sub>2</sub>CCH<sub>2</sub>), 136.0 (tosyl 1-C), 130.2 (tosyl 3-C and 5-C), 128.5, 128.4 (4-C and Ph), 127.51, 127.49 (tosyl 2-C and 6-C and 2'-C), 126.3 (5-C), 124.4 (Ph), 117.1 (NCH<sub>2</sub>C=CH<sub>2</sub>), 113.5 (3'-C), 96.9 (2-C), 75.7 (1'-C), 72.2 (6-C), 69.7 (3-C), 69.5 (3-COCH<sub>2</sub>), 65.4 (6-CCH<sub>2</sub>), 55.9 (OMe), 51.9 (NCH<sub>2</sub>CCH<sub>2</sub>), 40.7 (CF<sub>2</sub>CH<sub>2</sub>CH<sub>2</sub>), 30.9 (t, <sup>2</sup>*J*<sub>C–F</sub> 21.2, CF<sub>2</sub>CH<sub>2</sub>), 21.8 (tosyl Me), 17.5 (*iPr* CMe<sub>2</sub>) and 12.6 (*iPr* CMe<sub>2</sub>);  $\nu_{\text{max}}$ /cm<sup>–1</sup> (film); 2958, 2869, 1599, 1494, 1463 and 1455; *m/z* (ESI<sup>+</sup>) 1098.3 ([M + Na]<sup>+</sup> 100%); found MNa<sup>+</sup> 1098.2728, C<sub>43</sub>H<sub>50</sub>F<sub>17</sub>NO<sub>7</sub>SSi requires *MNa* 1098.2698.

***N*-(2-[(2*S*,3*R*,6*S*)-6-[(diisopropyl((*S*)-pent-4'-en-2'-yloxy)silyloxy)methyl]-2-methoxy-3,6-dihydro-2*H*-pyran-3-yloxy]methyl)allyl)-*N*-(3,3,4,4,5,5,6,6,7,7,8,8,9,9,10,10,10-heptafluorodecyl)-4-methylbenzenesulfonamide **S5****

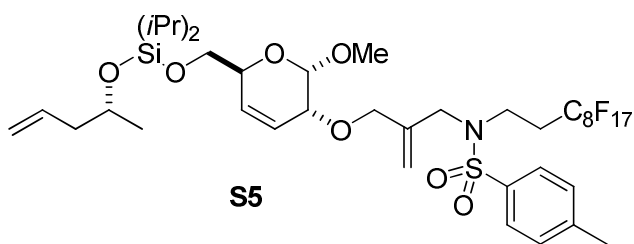

Following general procedure A, (*R*)-diisopropyl(pent-4-en-2-yloxy)silane (84 mg, 0.42 mmol) and alcohol **1** (100 mg, 0.12 mol) were stirred for 16 hours after which time methanol (2 mL) was then added and the solution was concentrated under reduced pressure. The residue was then suspended in pentane (5 mL), filtered and concentrated *in vacuo*, to give a crude product which was purified by Fluorous Solid Phase Extraction; 2 g cartridge, loading with <400  $\mu$ L DMF, eluting with 80:20 MeOH–H<sub>2</sub>O followed by MeOH to give the fluorous fraction, *sila-ketal* **S5** (118 mg, 95% , 73% purity by HPLC) as a colourless oil, *R<sub>f</sub>* 0.60 (80:20 petrol–EtOAc);  $\delta_{\text{H}}$  (500 MHz, CDCl<sub>3</sub>) 7.70 (2H, d, *J* 8.1, tosyl 2-H and 6-H), 7.33 (2H, d, *J* 8.1, tosyl 3-H and 5-H), 5.90 (1H, app d, *J* 10.3, 4-H), 5.83 (1H, ddt, *J* 17.1, 10.3 and 7.2, 4'-H) 5.73 (1H, app d, *J* 10.3, 5-H), 5.30 (1H, br s, NCH<sub>2</sub>C=CH<sub>A</sub>), 5.13 (1H, br s, NCH<sub>2</sub>C=CH<sub>B</sub>), 5.08–5.01 (2H, m, 5'-H), 4.95 (1H, br d, *J* 3.9, 2-H), 4.22–4.17 (1H, m, 6-H), 4.10–4.04 (2H, m, 3-H and 2'-H), 4.03 (2H, br s, 3-CCH<sub>2</sub>O), 3.84 (1H, dd, *J* 10.3 and 6.0, 6-CCH<sub>A</sub>), 3.82 (1H, d, *J* 15.0, NCH<sub>A</sub>CCH<sub>2</sub>), 3.78 (1H, d, *J* 15.0, NCH<sub>B</sub>CCH<sub>2</sub>), 3.72 (1H, dd, *J* 10.3 and 6.0, 6-CCH<sub>B</sub>), 3.50 (3H, s, OMe), 3.40–4.36 (2H, m, CF<sub>2</sub>CH<sub>2</sub>CH<sub>2</sub>), 2.44 (3H, s, tosyl Me), 2.43–2.33 (2H, m, CF<sub>2</sub>CH<sub>2</sub>), 2.32–2.26 (1H, m, 3'-H<sub>A</sub>), 2.24–2.17 (1H, m, 3'-H<sub>B</sub>), 1.18 (3H, d, *J* 6.0, 1'-H) and 1.06–0.98 (14H, m, *iPr*);  $\delta_{\text{C}}$  (75 MHz, CDCl<sub>3</sub>) 144.3 (tosyl 4-C), 141.0 (NCH<sub>2</sub>CCH<sub>2</sub>), 136.2 (tosyl 1-C), 135.6 (4'-C), 130.3 (tosyl 3-C and 5-C), 128.7 (4-C), 127.6 (tosyl 2-C and 6-C), 124.6 (5-C), 118.0 (3'-C), 117.2 (NCH<sub>2</sub>C=CH<sub>2</sub>), 97.2 (2-C), 72.4 (6-C), 69.8 (3-C), 69.6 (3-COCH<sub>2</sub>), 68.6 (2'-C), 65.6 (6-CCH<sub>2</sub>), 56.0 (OMe), 52.0 (NCH<sub>2</sub>CCH<sub>2</sub>), 44.6 (3'-C), 40.8 (CF<sub>2</sub>CH<sub>2</sub>CH<sub>2</sub>), 31.1 (t, <sup>2</sup>*J*<sub>C-F</sub> 21.8, CF<sub>2</sub>CH<sub>2</sub>), 23.5 (1'-C), 21.9 (tosyl Me), 17.6 (*iPr* CMe<sub>2</sub>) and 12.7 (*iPr* CMe<sub>2</sub>);  $\nu_{\text{max}}$ /cm<sup>-1</sup> (film); 2926, 2929, 2868, 1598 and 1463; *m/z* (ESI<sup>+</sup>) 1045.3 ([M + NH<sub>4</sub>]<sup>+</sup> 100%); found MNH<sub>4</sub><sup>+</sup> 1045.3140, C<sub>39</sub>H<sub>54</sub>F<sub>17</sub>N<sub>2</sub>O<sub>7</sub>SSi requires MNH<sub>4</sub> 1045.3150.

***N*-(2-[[*(2S,3R,6S)*-6-[(*Diisopropyl*(*S*)-pent-4'-en-2'-yloxy)silyloxy)methyl]-2-methoxy-3,6-dihydro-2*H*-pyran-3-yloxy]methyl}allyl)-*N*-(3,3,4,4,5,5,6,6,7,7,8,8,9,9,10,10,10heptafluorodecyl)-4-methylbenzenesulfonamide **S6****

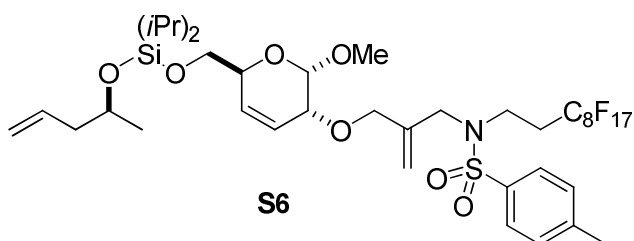



Following general procedure A, (*S*)-diisopropyl(pent-4-en-2-yloxy)silane (84 mg, 0.42 mmol) and alcohol **1** (100 mg, 0.12 mol) were stirred for 16 hours after which time methanol (2 mL) was added and the solution was concentrated under reduced pressure. The residue was then suspended in pentane (5 mL), filtered and concentrated under reduced pressure, to give a crude product which was purified by Fluorous Solid Phase Extraction; 2 g cartridge loading with <400  $\mu$ L DMF, eluting with 8:2 MeOH–H<sub>2</sub>O followed by MeOH to give the fluorous fraction, *sila-ketal* **S6** (105 mg, 85%, 75% purity by HPLC) as a colourless oil, *R*<sub>f</sub> 0.57 (80:20 petrol–EtOAc);  $\delta_{\text{H}}$  (500 MHz, CDCl<sub>3</sub>) 7.70 (2H, d, *J* 8.1, tosyl 2-H and 6-H), 7.32 (2H, d, *J* 8.1, tosyl 3-H and 5-H), 5.90 (1H, app d, *J* 10.3, 4-H), 5.82 (1H, ddt, *J* 17.1, 10.3 and 7.2, 4'-H) 5.73 (1H, app d, *J* 10.3, 5-H), 5.30 (1H, br s, NCH<sub>2</sub>C=CH<sub>A</sub>), 5.12 (1H, br s, NCH<sub>2</sub>C=CH<sub>B</sub>), 5.07-5.05 (1H, m, 5'-H<sub>A</sub>), 5.04-5.01 (1H, m, 5'-H<sub>B</sub>), 4.95 (1H, br d, *J* 3.9, 2-H), 4.21-4.16 (1H, m, 6-H), 4.09-4.03 (2H, m, 3-H and 2'-H), 4.02 (2H, br s, 3-COCH<sub>2</sub>), 3.84 (1H, dd, *J* 10.3 and 6.0, 6-CCH<sub>A</sub>), 3.82 (1H, d, *J* 15.0, NCH<sub>A</sub>CCH<sub>2</sub>), 3.78 (1H, d, *J* 15.0, NCH<sub>B</sub>CCH<sub>2</sub>), 3.72 (1H, dd, *J* 10.3 and 6.0, 6-CCH<sub>B</sub>), 3.49 (3H, s, OMe), 3.40-4.35 (2H, m, CF<sub>2</sub>CH<sub>2</sub>CH<sub>2</sub>), 2.42 (3H, s, tosyl Me), 2.42-2.35 (2H, m, CF<sub>2</sub>CH<sub>2</sub>), 2.32-2.25 (1H, m, 3'-H<sub>A</sub>), 2.23-2.17 (1H, m, 3'-H<sub>B</sub>), 1.18 (3H, d, *J* 6.0, 1'-H) and 1.06-0.98 (14H, m, *i*Pr);  $\delta_{\text{C}}$  (75 MHz, CDCl<sub>3</sub>) 144.3 (tosyl 4-C), 141.1 (NCH<sub>2</sub>CCH<sub>2</sub>), 136.2 (tosyl 1-C), 135.6 (4'-C), 130.3 (tosyl 3-C and 5-C), 128.7 (4-C), 127.6 (tosyl 2-C and 6-C), 124.8 (5-C), 117.17, 117.14 (4'-C and NCH<sub>2</sub>C=CH<sub>2</sub>), 97.2 (2-C), 72.4 (6-C), 69.8 (3-C), 69.6 (3-COCH<sub>2</sub>), 68.6 (2'-C), 65.6 (6-CCH<sub>2</sub>), 56.2 (OMe), 52.0 (NCH<sub>2</sub>CCH<sub>2</sub>), 44.6 (3'-C), 40.8 (CF<sub>2</sub>CH<sub>2</sub>CH<sub>2</sub>), 31.1 (t, <sup>2</sup>*J*<sub>C-F</sub> 21.0, CF<sub>2</sub>CH<sub>2</sub>), 23.5 (1'-C), 21.8 (tosyl Me), 17.7 (*i*Pr CMe<sub>2</sub>) and 12.7 (*i*Pr CMe<sub>2</sub>);  $\nu_{\text{max}}$ /cm<sup>-1</sup> (film); 3077, 3045, 2928, 2868, 1598, 1494 and 1463; *m/z* (ESI<sup>+</sup>) 1050.3 ([M + Na]<sup>+</sup> 100%); found MNa<sup>+</sup> 1050.2721, C<sub>39</sub>H<sub>50</sub>F<sub>17</sub>NO<sub>7</sub>SSi requires *MNa* 1050.2698.

## Synthesis of building blocks

### *N*-(4-Allyloxy-but-2-ynyl)-2-nitro benzenesulfonamide **22**

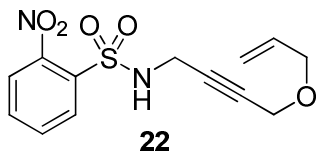

Following general procedure **B**, di-*t*-butyl azodicarboxylate (43.1 g, 0.19 mol), 4-(allyloxy)but-2-yn-1-ol (9.0 g, 93.8 mmol) and nosyl-Boc amine (56.6 g, 0.19 mol) gave the crude product after 2 hours. Purification by flash chromatography, eluting with 80:20 petrol–EtOAc, to give the Boc protected *sulfonamide*, along with the starting amine which co-eluted with the desired product as a 1:1 adduct. The sulfonamide mixture was then dissolved in 95:5 dichloromethane–trifluoroacetic acid (100 mL) and allowed to stir at room temperature for 24 h, after which time triethylamine (5 mL) was added dropwise at 0 °C. Brine (50 mL) was added and the aqueous layer extracted with ethyl acetate (2 × 50 mL). The organic extracts were subsequently combined, dried (MgSO<sub>4</sub>) and concentrated under reduced pressure. The crude product was purified by flash chromatography, eluting with 80:20 petrol–EtOAc to give the *sulfonamide* **22** (18.5 g, 64% over 2 steps) as colourless needles, m.p. 45 °C; *R*<sub>f</sub> 0.74 (1:1 petrol–EtOAc); (Found: C, 50.35; H, 4.55; N, 9.25; S, 10.05; C<sub>13</sub>H<sub>14</sub>N<sub>2</sub>O<sub>5</sub>S requires C, 50.31; H, 4.55; N, 9.03; S, 10.33); δ<sub>H</sub> (500 MHz, CDCl<sub>3</sub>) 8.27–8.23 (1 H, m, nosyl 3-H), 7.98–7.93 (1 H, m, nosyl 6-H), 7.84–7.76 (2 H, m, nosyl 4-H and 5-H), 5.84 (1 H, ddt, *J* 17.1, 10.5 and 5.6, allyl 2-H), 5.70 (1 H, t, *J* 5.7, NH), 5.22 (1 H, app. dq, *J* 17.1 and 1.7, allyl 3-H<sub>A</sub>), 5.19 (1 H, app. dq, *J* 10.5 and 1.7, allyl 3-H<sub>B</sub>), 4.06 (2 H, dt, *J* 6.4 and 1.9, 1-H), 3.88–3.85 (4 H, m, 4-H and allyl 1-H); δ<sub>C</sub> (75 MHz, CDCl<sub>3</sub>) 148.6 (nosyl 2-C), 134.5 (allyl 2-C), 134.1 (nosyl 4-C), 133.3 (nosyl 6-C), 133.2 (nosyl 1-C), 131.9 (nosyl 3-C), 125.9 (nosyl 5-C), 118.4 (allyl 3-C), 81.7 (3-C), 80.3 (2-C), 71.0 (allyl 1-C), 57.3 (4-C), and 34.1 (1-C); ν<sub>max</sub>/cm<sup>-1</sup> 3342, 3097, 3022, 2980 and 2858; *m/z* (ESI<sup>+</sup>) 333.1 ([M + Na]<sup>+</sup> 100%); found MNa<sup>+</sup> 333.0516, C<sub>13</sub>H<sub>14</sub>N<sub>2</sub>NaO<sub>5</sub>S requires *MNa* 333.0521.

**Preparation of metathesis substrates, metathesis reactions and release of the products (see Table)**

***N*-Allyl-*N*-{[(2*S*,5*R*,6*S*)-5-[[*N*'-(3,3,4,4,5,5,6,6,7,7,8,8,9,9,10,10,10-heptafluorodecyl)-4-methylphenylsulfonamido]allyloxy]-6-methoxy-5,6-dihydro-2*H*-pyran-2-yl]methyl}-2-nitrobenzenesulfonamide **S7****

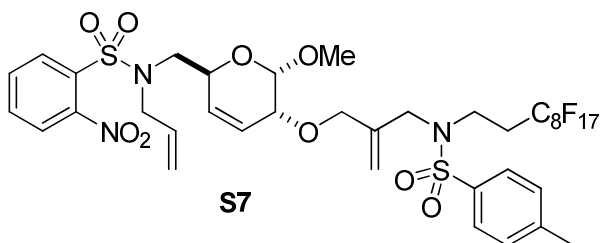

Following general procedure **B**, di-*tert*butyl azodicarboxylate (111 mg, 0.48 mmol), *N*-allyl-2-nitrobenzenesulfonamide **19** (117 mg, 0.48 mmol) and alcohol **1** (100 mg, 0.12 mmol) gave the crude product after 3 hours. Purification by Fluorous Solid Phase Extraction; 2 g cartridge, loading with <400  $\mu$ L DMF, eluting with 80:20 MeOH–H<sub>2</sub>O followed by MeOH, gave the fluorous fraction, *sulfonamide S7* (115 mg, 91%, 94% purity by HPLC) as a colourless oil, *R<sub>f</sub>* 0.32 (60:40 petrol–EtOAc);  $\delta_{\text{H}}$  (500 MHz, CDCl<sub>3</sub>) 8.10-8.05 (1H, m, nosyl 3-H), 7.72-7.63 (5H, m, Ar), 7.34 (2H, d, *J* 8.1, tosyl 3-H and 5-H), 5.67-5.67 (2H, m, 3-H and 4-H), 5.67 (1H, ddt, *J* 17.1, 10.3 and 6.4, allyl 2-H), 5.29 (1H, s, 3-COCH<sub>2</sub>C=CH<sub>A</sub>), 5.20 (1H, app. dq, *J* 17.1 and 1.3, allyl 3-H<sub>A</sub>), 5.18 (1H, app. dq, *J* 10.3 and 1.3, allyl 3-H<sub>B</sub>), 5.12 (1H, s, 3-COCH<sub>2</sub>C=CH<sub>B</sub>), 4.77 (1H, br. d, *J* 3.9, 6-H), 4.32-4.28 (1H, m, 2-H), 4.16 (1H, dd, *J* 16.2 and 6.4, allyl 1-H<sub>A</sub>), 4.06 (1H, dd, *J* 16.2 and 6.4, allyl 1-H<sub>B</sub>), 4.02 (2H, br. s, 5-COCH<sub>2</sub>), 4.01-3.97 (1H, m, 5-H), 3.79 (2H, br. s, NCH<sub>2</sub>CCH<sub>2</sub>), 3.54 (1H, dd, *J* 15.0 and 3.9, 2-CCH<sub>A</sub>), 3.42 (1H, dd, *J* 15.0 and 8.1, 2-CCH<sub>B</sub>), 3.39 (3H, s, OMe), 3.39-3.34 (2H, m, CF<sub>2</sub>CH<sub>2</sub>CH<sub>2</sub>), 2.44 (3H, s, tosyl Me) and 2.44-2.30 (2H, m, CF<sub>2</sub>CH<sub>2</sub>);  $\delta_{\text{C}}$  (75 MHz, CDCl<sub>3</sub>) 148.3 (nosyl 2-C), 144.5 (tosyl 4-C), 140.9 (3-COCH<sub>2</sub>C), 136.0 (tosyl 1-C), 134.5 (nosyl 1-C), 133.9 (nosyl 3-C), 132.8 (allyl 2-C), 132.0, 131.7 (nosyl 4-C and 6-C), 130.4 (tosyl 3-C and 5-C), 127.59, 127.56 (4-C and tosyl 2-C and 6-C), 125.8 (3-C), 124.5 (nosyl 5-C), 119.8 (allyl 3-C), 117.6 (3-COCH<sub>2</sub>C=CH<sub>2</sub>), 97.0 (6-C), 72.1 (5-C), 69.7 (5-COCH<sub>2</sub>), 68.1 (2-C), 56.2 (OMe), 52.1 (NCH<sub>2</sub>CCH<sub>2</sub>), 51.5 (allyl 1-C), 50.2 (2-CCH<sub>2</sub>), 40.9 (CF<sub>2</sub>CH<sub>2</sub>CH<sub>2</sub>), 31.0 (CF<sub>2</sub>CH<sub>2</sub>), 21.9 (tosyl Me);  $\nu_{\text{max}}$ /cm<sup>-1</sup> (film); 3088, 2928, 2255, 1597, 1545 and 1494; *m/z* (ESI<sup>+</sup>) 1076.2 ([M + Na]<sup>+</sup> 100%); found MNa<sup>+</sup> 1076.1514, C<sub>37</sub>H<sub>36</sub>F<sub>17</sub>N<sub>3</sub>O<sub>9</sub>S<sub>2</sub> requires *MNa* 1076.1519.

***N*-(3,3,4,4,5,5,6,6,7,7,8,8,9,9,10,10,10-Heptafluorodecyl)-*N*'-{[(*R*)-5-{(*S*)-methoxy[(*S*)-1'-(2-nitrophenylsulfonyl)-1',2',3',6'-tetrahydropyridin-3'-yloxy]methyl}-2,5-dihydrofuran-3-yl]methyl}-4-methylbenzenesulfonamide **26** (R = R<sup>F</sup>)**

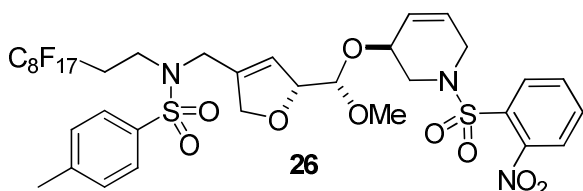

Following general procedure **C**, **HG II** ( $3 \times 6$  mg,  $3 \times 5$  mol%) and sulfonamide **S7** (200 mg, 0.19 mmol) gave the crude product after 5 days. Purification by Fluorous Solid Phase Extraction; 2 g cartridge loading with  $<400$   $\mu$ L DMF, eluting with 80:20 MeOH–H<sub>2</sub>O followed by MeOH to give the fluorous fraction, *sulfonamide 26* ( $R = R'^F$ ) (175 mg, 90%, 94% purity by HPLC) as a colourless oil,  $R_f$  0.31 (80:20 petrol–EtOAc);  $\delta_H$  (500 MHz, CDCl<sub>3</sub>) 8.03 (1H, dd,  $J$  7.3 and 2.1, nosyl 3-H), 7.73–7.67 (4H, m, tosyl 2-H and 6-H and nosyl 4-H and 5-H), 7.63 (1H, dd,  $J$  7.3 and 2.1, nosyl 6-H), 7.34 (2H, d,  $J$  8.1, tosyl 3-H and 5-H), 5.91 (1H, app. dq,  $J$  10.3 and 2.1, 4'-H), 5.84–5.79 (1H, m, 5'-H), 5.71 (1H, br. s, 4-H), 4.73–4.69 (1H, m, 5-H), 4.54–4.48 (1H, m, 2-H<sub>A</sub>), 4.44–4.39 (1H, m, 2-H<sub>A</sub>), 4.36 (1H, d,  $J$  5.1, CHOMe), 4.32–4.27 (1H, m, 3'-H), 3.93 (2H, br. s, 3-CCH<sub>2</sub>), 3.90–3.88 (1H, m, 6'-H<sub>A</sub>), 3.86 (1H, dd,  $J$  12.8 and 5.1, 2'-H<sub>A</sub>), 3.78–3.75 (1H, m, 6'-H<sub>B</sub>), 3.43–3.37 (5H, m, OMe and CF<sub>2</sub>CH<sub>2</sub>CH<sub>2</sub>), 3.15 (1H, dd,  $J$  12.8 and 7.0, 2'-H<sub>B</sub>) and 2.48–2.40 (5H, m, tosyl Me and CF<sub>2</sub>CH<sub>2</sub>);  $\delta_C$  (75 MHz, CDCl<sub>3</sub>) 148.3 (nosyl 2-C), 144.2 (tosyl 4-C), 137.94, 137.91 (3-C and nosyl 1-C), 135.6 (tosyl 1-C), 133.7 (nosyl 3-C), 132.0, 131.7, (nosyl 4-C and 6-C), 130.9 (tosyl 3-C and 5-C), 127.7 (4'-C), 127.2 (tosyl 2-C and 6-C), 125.44, 125.38 (5'-C and 4-C), 124.2 (nosyl 5-C), 105.1 (5-CCHOMe), 87.1 (5-C), 75.7 (2-C), 69.1 (3'-C), 56.1 (OMe), 46.9 (2'-C), 45.9 (3-CCH<sub>2</sub>), 44.4 (6'-C), 40.3 (CF<sub>2</sub>CH<sub>2</sub>CH<sub>2</sub>), 30.8 (CF<sub>2</sub>CH<sub>2</sub>), 21.6 (tosyl Me);  $\nu_{max}/cm^{-1}$  (film) 3093, 3049, 2956, 2924, 2854, 1741, 1711, 1661, 1597 and 1547;  $m/z$  (ES<sup>+</sup>) 1048.1 ([M + Na]<sup>+</sup> 100%); found  $MNa^+$  1048.1247, C<sub>35</sub>H<sub>32</sub>F<sub>17</sub>N<sub>3</sub>O<sub>9</sub>S<sub>2</sub> requires  $MNa$  1048.1201.

**(S)-1-(2-nitrophenylsulfonyl)-1,2,3,6-tetrahydropyridin-3-ol 26** ( $R = H$ )

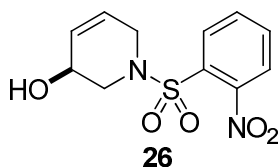

Following general procedure **D**, sulfonamide **26** ( $R = R'^F$ ) (40 mg, 0.039 mmol) and 3% trifluoroacetic acid gave the crude product after 16 hours. Purification by Fluorous Solid Phase Extraction; 2 g cartridge, loading with  $<400$   $\mu$ L DMF, with 80:20 MeOH–H<sub>2</sub>O, gave the organic fraction. Further purification by flash chromatography, eluting with 50:50 petrol–EtOAc, gave the *alcohol 26* ( $R = H$ ) (7 mg, 70%) as a colourless oil,  $R_f$  0.12 (80:20 petrol–EtOAc);  $[\alpha]_D^{20} +73.6$  (c

1.00 in chloroform);  $\delta_{\text{H}}$  (500 MHz,  $\text{CDCl}_3$ ) 8.07 (1H, dd,  $J$  7.3 and 1.7, nosyl 3-H), 7.76-7.69 (2H, m, nosyl 4-H and 6-H), 7.65 (1H, dd,  $J$  7.4 and 1.7, nosyl 5-H), 5.99-5.94 (1H, m, 4-H), 5.90 (1H, dt,  $J$  10.3 and 3.0, 5-H), 4.26-4.20 (1H, m, 3-H), 4.05-3.97 (1H, m, 6-H<sub>A</sub>), 3.78-3.72 (1H, m, 6-H<sub>B</sub>), 3.53 (1H, dd,  $J$  12.8 and 3.9, 2-H<sub>A</sub>), 3.44 (1H, m, 12.8 and 3.9, 2-H<sub>B</sub>) and 2.00 (1H, br.d,  $J$  9.0, OH);  $\delta_{\text{C}}$  (75 MHz,  $\text{CDCl}_3$ ) 148.7 (nosyl 2-C), 134.3 (nosyl 4-C), 132.1 (nosyl 6-C), 132.0 (nosyl 1-C), 131.6 (nosyl 3-C), 128.5 (4-C), 126.6 (5-C), 124.6 (nosyl 5-C), 63.6 (3-C), 50.1 (2-C), 44.9 (6-C);  $\nu_{\text{max}}/\text{cm}^{-1}$  (film) 3518 (br), 3399 (br), 3095, 3023, 2962, 2924, 2854, 1590, 1544 and 1450;  $m/z$  ( $\text{ESI}^+$ ) 307.0 ( $[\text{M} + \text{Na}]^+$  100%); found  $\text{MNa}^+$  307.0359,  $\text{C}_{11}\text{H}_{12}\text{N}_2\text{O}_5\text{S}$  requires  $\text{MNa}$  307.0359.

***N*-(But-3-enyl)-*N*-{[(2'*S*,5'*R*,6'*S*)-5'-{2-[(*N*-{3,3,4,4,5,5,6,6,7,7,8,8,9,9,10,10,10-heptafluorodecyl}-4-methylphenylsulfonamido)methyl]allyloxy}-6'-methoxy-5',6'-dihydro-2*H*-pyran-2'-yl)methyl]-2-nitrobenzenesulfonamide **S8****

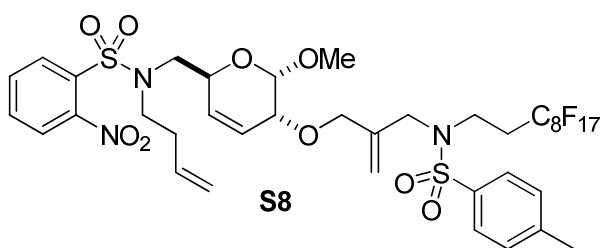

Following general procedure **B**, diethyl azodicarboxylate (88  $\mu\text{L}$ , 0.48 mmol), sulfonamide **20** (124 mg, 0.48 mmol) and alcohol **1** (100 mg, 0.12 mmol) gave the crude product after 3 hours. Purification by Fluorous Solid Phase Extraction; 5 g cartridge, loading with <1 mL DMF, eluting with 80:20 MeOH– $\text{H}_2\text{O}$  followed by MeOH, gave the fluorous fraction, the *sulfonamide* **S8** (127 mg, 99%, 92% purity by HPLC) as a colourless oil,  $R_{\text{f}}$  0.32 (60:40 petrol–EtOAc);  $\delta_{\text{H}}$  (500 MHz,  $\text{CDCl}_3$ ) 8.07-8.04 (1H, m, nosyl 3-H), 7.73-7.62 (5H, m, Ar), 7.34 (2H, d,  $J$  8.1, tosyl 3-H and 5-H), 5.78-5.70 (2H, m, 3'-H and 4'-H), 5.66 (1H, ddt,  $J$  17.1, 10.3 and 6.8, 3-H), 5.30 (1H, br. s,  $\text{NCH}_2\text{C}=\text{CH}_A$ ), 5.14 (1H, br. s,  $\text{NCH}_2\text{C}=\text{CH}_B$ ), 5.04 (1H, app. dq,  $J$  17.1 and 1.5, 4-H<sub>A</sub>), 4.99 (1H, app. dq,  $J$  10.3 and 1.5, 4-H<sub>B</sub>), 4.81 (1H, d,  $J$  3.9, 6'-H), 4.32-4.28 (1H, m, 2'-H), 4.05-4.00 (3H, m, 5'-H and 5-COCH<sub>2</sub>), 3.83-3.75 (2H, m,  $\text{NCH}_2\text{CCH}_2$ ), 3.62-3.55 (2H, m, 1-H), 3.48 (6H, m, OMe,  $\text{CF}_2\text{CH}_2\text{CH}_2$  and 2'-CCH<sub>2</sub>), 2.44 (3H, s, tosyl Me), 2.44-2.30 (4H, m,  $\text{CF}_2\text{CH}_2$  and 2-H);  $\delta_{\text{C}}$  (75 MHz,  $\text{CDCl}_3$ ) 148.1 (nosyl 2-C), 144.1 (tosyl 4-C), 140.6 ( $\text{NCH}_2\text{CCH}_2$ ), 135.8 (tosyl 1-C), 134.3 (3-C), 134.0 (nosyl 4-C), 133.5 (nosyl 1-C), 131.6, 131.1 (nosyl 3-C and 6-C), 130.0 (tosyl 3-C and 5-C), 127.24, 127.22 (4'-C and tosyl 2-C and 6-C), 125.6 (3'-C), 124.2 (nosyl 5-C), 117.6 (4-C), 117.2 ( $\text{NCH}_2\text{C}=\text{CH}_2$ ), 96.7 (6'-C), 71.8 (5'-C), 69.4 (5-COCH<sub>2</sub>), 68.0 (2'-C), 55.9 (OMe), 51.8 ( $\text{NCH}_2\text{CCH}_2$ ), 50.5 (1-C), 48.1 (2'-CCH<sub>2</sub>), 40.5 ( $\text{CF}_2\text{CH}_2\text{CH}_2$ ), 32.3 (2-C), 30.7 (t,  $^2J_{\text{C-F}}$  21.8,

CF<sub>2</sub>CH<sub>2</sub>) and 21.5 (tosyl Me);  $\nu_{\max}/\text{cm}^{-1}$  (film) 2916, 2849, 1736, 1576, 1541 and 1471;  $m/z$  (ESI<sup>+</sup>) 1090.2 ([M + Na]<sup>+</sup> 100%); found MNa<sup>+</sup> 1090.1706, C<sub>38</sub>H<sub>38</sub>F<sub>17</sub>N<sub>3</sub>O<sub>9</sub>S<sub>2</sub> requires MNa 1090.1670.

***N*-(3,3,4,4,5,5,6,6,7,7,8,8,9,9,10,10,10-heptafluorodecyl)-*N*-{[(*R*)-5-[(*S*)-methoxy[(*S,Z*)-1'-{2-nitrophenylsulfonyl}-2',3',6',7'-tetrahydro-1*H*-azepin-3'-yloxy]methyl]-2,5-dihydrofuran-3-yl]methyl}-4-methylbenzenesulfonamide 27** (R = R<sup>F</sup>)

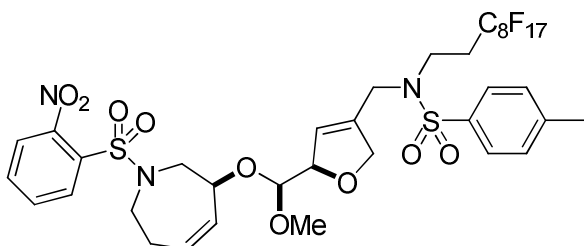

Following general procedure **C**, sulfonamide (96 mg, 0.10mmol) and **HG II** (3 × 3 mg, 3 × 5 mol%) gave the crude product after 9 days. Purification by Fluorous Solid Phase Extraction; 2 g cartridge, loading with <400  $\mu\text{L}$  DMF, eluting with 80:20 MeOH–H<sub>2</sub>O followed by MeOH, gave the crude sulfonamide **27** (R = R<sup>F</sup>) (74 mg, 80%, 69% purity by HPLC) as a colourless oil. Further purification by flash chromatography gave the *sulfonamide 27* (R = R<sup>F</sup>) (50 mg, 55%) as a colourless oil,  $R_f$  0.33 (80:20 petrol–EtOAc);  $[\alpha]_D^{20} +17.6$  (c 1.00 in chloroform);  $\delta_H$  (500 MHz, CDCl<sub>3</sub>) 8.02–7.99 (1H, m, nosyl 3-H), 7.73–7.63 (5H, m, Ar), 7.34 (2H, d,  $J$  8.1, tosyl 3-H and 5-H), 5.94–5.91 (1H, m, 4'-H), 5.85–5.79 (1H, m, 5'-H), 5.72 (1H, br. s, 4-H), 4.74–4.69 (1H, m, 5-H), 4.54 (1H, ddd,  $J$  12.5, 5.8 and 1.8, 2-H<sub>A</sub>), 4.46–4.40 (2H, m, 2-H<sub>B</sub> and 3'-H), 4.37 (1H, d,  $J$  5.4, CHOMe), 4.03–3.89 (3H, m, 3-CCH<sub>2</sub>N and 2'-H<sub>A</sub>), 3.83–3.76 (1H, m, 7'-H<sub>A</sub>), 3.45–3.38 (5H, m, OMe and CF<sub>2</sub>CH<sub>2</sub>CH<sub>2</sub>), 3.02–2.94 (2H, m, 2'-H<sub>B</sub> and 7'-H<sub>B</sub>), 2.50–2.39 (6H, m, tosyl Me, CF<sub>2</sub>CH<sub>2</sub> and 6'-H<sub>A</sub>) and 2.38–2.30 (1H, m, 6'-H<sub>B</sub>);  $\delta_C$  (75 MHz, CDCl<sub>3</sub>) 148.0 (tosyl 4-C), 144.2 (tosyl 4-C), 137.9 (3-C), 135.8 (tosyl 1-C), 135.2 (nosyl 4-C), 133.6 (nosyl 6-C), 133.1 (nosyl 1-C), 131.7, (nosyl 3-C), 130.8 (tosyl 3-C and 5-C), 128.1 (4'-C), 127.2 (tosyl 2-C and 6-C), 125.6 (5'-C and 4-C), 124.3 (nosyl 5-C), 105.7 (5-CCHOMe), 87.2 (5-C), 77.5 (3'-C), 75.7 (2-C), 56.3 (OMe), 51.7 (2'-C), 48.5 (7'-C), 45.9 (3-CCH<sub>2</sub>N), 40.3 (CF<sub>2</sub>CH<sub>2</sub>CH<sub>2</sub>), 30.9 (t,  $^2J_{C-F}$  21.0, CF<sub>2</sub>CH<sub>2</sub>), 30.3 (6'-C), 21.7 (tosyl Me);  $\nu_{\max}/\text{cm}^{-1}$  (film) 2848, 2925, 2854, 1714, 1597, 1545 and 1453;  $m/z$  (ESI<sup>+</sup>) 1062.1 (M + Na<sup>+</sup> 100%); found MNa<sup>+</sup> 1062.1386, C<sub>36</sub>H<sub>34</sub>F<sub>17</sub>N<sub>3</sub>O<sub>9</sub>S<sub>2</sub> requires MNa 1062.1357.

**(*S*)-1-(2-Nitrophenylsulfonyl)-2,3,6,7-tetrahydro-1*H*-azepin-3-ol 27** (R = H)

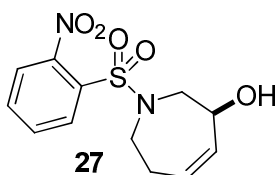

Following general procedure **D**, sulfonamide **27** ( $R = R'^F$ ) (46 mg, 0.045 mmol) and 3% trifluoroacetic acid in DCM gave the crude product after 16 hours. Purification by Fluorous Solid Phase Extraction; 2 g cartridge, loading with <400  $\mu$ L DMF, with 80:20 MeOH–H<sub>2</sub>O, to give the organic fraction. Further purification by flash chromatography, eluting with 60:40 petrol–EtOAc, gave the *alcohol* **27** ( $R = H$ ) (10 mg, 77%) as a colourless oil,  $R_f$  0.15 (50:50 petrol–EtOAc);  $[\alpha]_D^{20} +42.8$  ( $c$  1.00 in chloroform);  $\delta_H$  (500 MHz, CDCl<sub>3</sub>) 8.06-8.02 (1H, m, 3'-H), 7.71-7.68 (3H, m, Ar), 7.65-7.62 (1H, m, Ar), 5.91-5.86 (1H, m, 4-H), 5.81 (1H, dtd,  $J$  11.3, 5.0 and 1.5, 5-H), 4.61-4.55 (1H, m, 3-H), 3.97 (2H, t,  $J$  4.3, 7-H), 3.67-3.61 (1H, m, 2-H<sub>A</sub>), 3.53-3.46 (1H, m, 2-H<sub>B</sub>), 2.15-2.05 (2H, m, 6-H);  $\delta_C$  (75 MHz, CDCl<sub>3</sub>) 144.9 (tosyl 4-C), 133.7 (nosyl 4-C), 133.6 (nosyl 1-C), 131.7, (nosyl 3-C), 131.1 (nosyl 6-C), 127.3 (4-C), 124.3 (nosyl 5-C), 119.9 (5-C), 68.8 (3-C), 45.8, 44.6 (2-C and 7-C) and 35.4 (6-C);  $\nu_{max}/cm^{-1}$  (film) 3399, 3023, 2962, 2854, 1597, 1545 and 1453;  $m/z$  (ESI<sup>+</sup>) 321.0 ( $M + Na^+$  100%); found  $MNa^+$  321.0517, C<sub>12</sub>H<sub>14</sub>N<sub>2</sub>O<sub>5</sub>S<sub>1</sub> requires  $MNa$  321.0516.

***N*-[[(2*S*,5*R*,6*S*)-5-[2-[[*N*-(3,3,4,4,5,5,6,6,7,7,8,8,9,9,10,10,10-heptafluorodecyl)-4-methylphenylsulfonamido]methyl]allyloxy]-6-methoxy-5,6-dihydro-2*H*-pyran-2-yl]methyl]-2-nitro-*N*-{(*R*)-pent-4'-en-2'-yl}benzenesulfonamide **S9****

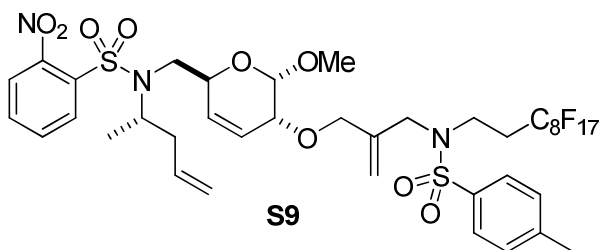

Following general procedure **B**, diethyl azodicarboxylate (72  $\mu$ L, 0.39 mmol), sulfonamide **18** (100 mg, 0.10 mmol) and alcohol **21** (107  $\mu$ L, 0.98 mmol) gave the crude product after 3 hours. Purification by Fluorous Solid Phase Extraction; 2 g cartridge, loading with <200  $\mu$ L dichloromethane, eluting with 80:20 MeOH–H<sub>2</sub>O followed by MeOH, gave the fluorous fraction which contained approximately 70% of the starting amine. The fluorous mixture was further purified by flash chromatography, eluting with 80:20 petrol–EtOAc, to give the *sulfonamide* **S9** (28 mg, 26%) as a colourless foam,  $R_f$  0.86 (50:50 petrol–EtOAc);  $\delta_H$  (500 MHz, CDCl<sub>3</sub>) 8.09-8.05 (1H, m, nosyl 3-H), 7.72-7.65 (4H, m, Ar), 7.63-7.60 (1H, m, nosyl 5-H), 7.34 (2H, d,  $J$  7.9, tosyl 3-H and 5-H), 5.85-5.81 (1H, m, 3-H), 5.77-5.67 (2H, m, 4-H and 4'-H), 5.30 (1H, br. s, 5-COCH<sub>2</sub>C=CH<sub>A</sub>), 5.14 (1H, br.s, 5-COCH<sub>2</sub>C=CH<sub>B</sub>), 5.05 (1H, app. dq,  $J$  17.1 and 1.4, 5'-H<sub>A</sub>), 5.00 (1H, app. dq,  $J$  10.0 and 1.4, 5'-H<sub>B</sub>), 4.86 (1H, d,  $J$  3.8, 6-H), 4.39-4.34 (1H, m, 2-H), 4.06-4.01 (3H, m, 5-H and 5-COCH<sub>2</sub>), 4.01-3.94 (1H, m, 2'-H), 3.82 (1H, d,  $J$  15.0, NCH<sub>A</sub>CCH<sub>2</sub>), 3.77 (1H, d,  $J$  15.0, NCH<sub>B</sub>CCH<sub>2</sub>), 3.47 (1H, dd,  $J$  15.6 and 3.8, 2-CCH<sub>A</sub>), 3.41 (3H, s, OMe), 3.40-3.35 (2H,

m, CF<sub>2</sub>CH<sub>2</sub>CH<sub>2</sub>), 3.33 (1H, dd, *J* 15.6 and 8.0, 2-CCH<sub>B</sub>), 2.53-2.46 (1H, m, 3'-H<sub>A</sub>), 2.44 (3H, s, tosyl Me), 2.42-2.31 (2H, m, CF<sub>2</sub>CH<sub>2</sub>), 2.30-2.21 (1H, m, 3'-H<sub>B</sub>), 1.15 (3H, d, *J* 7.1, 1'-H); δ<sub>C</sub> (75 MHz, CDCl<sub>3</sub>) 148.6 (nosyl 2-C), 144.4 (tosyl 4-C), 140.9 (5-COCH<sub>2</sub>C), 136.2 (tosyl 1-C), 135.2 (4'-C), 134.4 (nosyl 4-C), 133.7 (nosyl 1-C), 131.8, 131.7 (nosyl 3-C and nosyl 6-C), 130.3 (tosyl 3-C and 5-C), 128.0 (3-C), 127.6 (tosyl 2-C and 6-C), 125.4 (4-C), 124.5 (nosyl 5-C), 117.9 (5'-C), 117.5 (5-COCH<sub>2</sub>C=CH<sub>2</sub>), 97.2 (6-C), 72.2 (5-C), 69.7 (5-COCH<sub>2</sub>), 68.9 (2-C), 56.2 (OMe), 55.3 (2'-C), 52.1 (NCH<sub>2</sub>CCH<sub>2</sub>), 48.1 (2-CCH<sub>2</sub>), 40.9 (CF<sub>2</sub>CH<sub>2</sub>CH<sub>2</sub>), 40.7 (3'-C), 31.1 (CF<sub>2</sub>CH<sub>2</sub>), 21.9 (tosyl Me), 18.9 (1'-C); ν<sub>max</sub>/cm<sup>-1</sup> (film) 2916, 2849, 1734, 1574, 1540 and 1470; *m/z* (ESI<sup>+</sup>) 1104.2 ([M + Na]<sup>+</sup> 100%), 1099.2 ([M + NH<sub>4</sub>]<sup>+</sup> 90%); found MNa<sup>+</sup> 1104.1791, C<sub>39</sub>H<sub>40</sub>F<sub>17</sub>N<sub>3</sub>O<sub>9</sub>S<sub>2</sub> requires MNa 1104.1827.

***N*-(3,3,4,4,5,5,6,6,7,7,8,8,9,9,10,10,10-Heptafluorodecyl)-*N*-[*(R)*-5-[*(S)*-methoxy{*(3'S,7'R,Z)*-7'-methyl-1-(2-nitrophenylsulfonyl)-2',3',6',7'-tetrahydro-1*H*-azepin-3'-yloxy}methyl]-2,5-dihydrofuran-3-yl]methyl]-4-methylbenzenesulfonamide **28** (R = R<sup>F</sup>)**

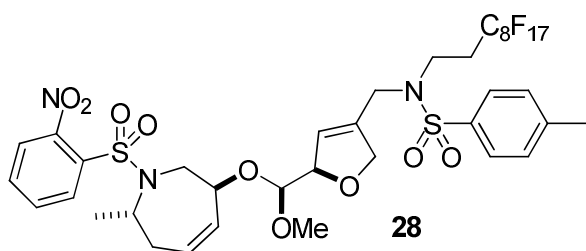

Following general procedure **C**, **HG II** (2 × 3 mg, 2 × 5 mol%) and sulfonamide **S9** (45 mg, 0.042 mmol) gave the crude product after 6 days. Purification by Fluorous Solid Phase Extraction; 2 g cartridge, loading with <400 μL DMF, eluting with 80:20 MeOH–H<sub>2</sub>O followed by MeOH to give the crude sulfonamide **28** (R = R<sup>F</sup>) (43 mg, 98%, 85% purity by HPLC) as a colourless oil. Further purification by flash chromatography, eluting with 70:30 petrol–EtOAc, gave the *sulfonamide* **28** (R = R<sup>F</sup>) (31 mg, 71%) as a colourless oil, *R<sub>f</sub>* 0.87 (50:50 petrol–EtOAc); δ<sub>H</sub> (500 MHz, CDCl<sub>3</sub>) 8.13-8.09 (1H, m, nosyl 3-H), 7.69 (2H, d, *J* 8.1, tosyl 2-H and 6-H), 7.68-7.64 (2H, m, nosyl 4-H and 6-H), 7.62-7.59 (1H, m, nosyl 5-H), 7.34 (2H, d, *J* 8.1, tosyl 3-H and 5-H), 5.77-5.65 (3H, m, 4-H, 4'-H and 5'-H), 4.77-4.72 (1H, m, 5-H), 4.52 (1H, ddd, *J* 12.7, 5.7 and 1.8, 2-H<sub>A</sub>), 4.41 (1H, app. dt, *J* 12.7 and 1.8, 2-H<sub>B</sub>), 4.37 (1H, d, *J* 4.7, CHOMe), 4.32-4.26 (1H, m, 3'-H), 4.16-4.08 (1H, m, 7'-H), 3.92 (2H, s, 3-CCH<sub>2</sub>N), 3.75 (1H, dd, *J* 15.0 and 6.2, 2'-H<sub>A</sub>), 3.67 (1H, dd, *J* 15.0 and 3.0, 2'-H<sub>B</sub>), 3.43-3.36 (5H, m, OMe and CF<sub>2</sub>CH<sub>2</sub>CH<sub>2</sub>), 2.62 (1H, dt, *J* 15.0 and 4.1, 6'-H<sub>A</sub>), 2.51-2.37 (5H, m, tosyl Me and CF<sub>2</sub>CH<sub>2</sub>), 2.15 (1H, dt, *J* 15.0 and 6.8, 6'-H<sub>B</sub>); δ<sub>C</sub> (75 MHz, CDCl<sub>3</sub>) 148.1 (nosyl 2-C), 144.1 (tosyl 4-C), 137.6 (3-C), 135.7 (tosyl 1-C), 134.0 (nosyl 4-C), 133.2 (4-C), 132.1 (nosyl 1-C), 131.5, 131.4 (nosyl 3-C and nosyl 6-C), 130.0 (tosyl 3-C and 5-C), 127.4 (4'-C), 127.2 (tosyl



2-C and 6-C), 125.7 (5'-C), 124.0 (nosyl 5-C), 104.9 (CHOMe), 87.3 (5-C), 75.7 (2-C), 74.8 (3'-C), 56.3 (OMe), 52.8 (7'-C), 46.9 (2'-C), 46.0 (3-CCH<sub>2</sub>N), 40.3 (CF<sub>2</sub>CH<sub>2</sub>CH<sub>2</sub>), 33.2 (6'-C), 30.9 (CF<sub>2</sub>CH<sub>2</sub>), 21.5 (tosyl Me) and 19.4 (7'-CCH<sub>3</sub>);  $\nu_{\max}/\text{cm}^{-1}$  (film) 3095, 3031, 2924, 2853, 1598, 1545 and 1455;  $m/z$  (ESI<sup>+</sup>) 1076.1 ([M + Na]<sup>+</sup> 100%); found MNa<sup>+</sup> 1076.1472, C<sub>37</sub>H<sub>36</sub>F<sub>17</sub>N<sub>3</sub>O<sub>9</sub>S<sub>2</sub> requires MNa 1076.1514.

**(S)-[(R)-7-methyl]-1-(2-Nitrophenylsulfonyl)-2,3,6,7-tetrahydro-1H-azepin-3-ol 28** (R = H)

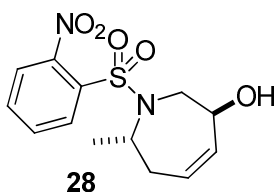

Following general procedure **D**, sulfonamide **28** (R = R<sup>F</sup>) (30 mg, 0.028 mmol) and 3% trifluoroacetic acid gave the crude product after 16 hours. Purification by Fluorous Solid Phase Extraction; 2 g cartridge, loading with <400  $\mu\text{L}$  DMF, with 80:20 MeOH–H<sub>2</sub>O, gave the organic fraction. Further purification by flash chromatography, eluting with 60:40 petrol–EtOAc, gave the *alcohol 28* (R = H) (6 mg, 62%) as a colourless oil,  $R_f$  0.17 (50:50 petrol–EtOAc);  $[\alpha]_D^{20} +128.8$  ( $c$  0.50 in chloroform);  $\delta_H$  (500 MHz, CDCl<sub>3</sub>) 8.15-8.12 (1H, m, nosyl 3-H), 7.77-7.66 (3H, m, Ar), 5.86-5.81 (1H, m, 4-H), 5.80-5.74 (1H, m, 5-H), 4.48-4.43 (1H, m, 3-H), 4.38-4.30 (1H, m, 7-H), 3.88-3.82 (1H, m, 2-H<sub>A</sub>), 3.65 (1H, dd,  $J$  15.9 and 3.3, 2-H<sub>B</sub>), 2.73 (1H, d,  $J$  8.0, OH), 2.61-2.54 (1H, m, 6-H<sub>A</sub>), 2.26-2.18 (1H, m, 6-H<sub>B</sub>) and 1.14 (3H, d,  $J$  6.6, 7-CCH<sub>3</sub>);  $\delta_C$  (75 MHz, CDCl<sub>3</sub>) 148.3 (nosyl 2-C), 134.0 (nosyl 1-C), 133.8 (4-C), 133.5 (nosyl 4-C), 131.6 (nosyl 6-C), 131.1 (nosyl 3-C), 126.5 (5-C), 124.2 (nosyl 5-C), 69.8 (3-C), 53.0 (7-C), 48.2 (2-C), 34.1 (6-C) and 18.3 (7-CCH<sub>3</sub>);  $\nu_{\max}/\text{cm}^{-1}$  (film) 3523, 3096, 3026, 2977, 2934 and 1543;  $m/z$  (ESI<sup>+</sup>) 335.1 ([M + Na]<sup>+</sup> 100%); found MNa<sup>+</sup> 335.0666, C<sub>13</sub>H<sub>16</sub>N<sub>2</sub>O<sub>5</sub>S requires MNa 335.0672.

***N*-[4-(allyloxy)but-2-ynyl]-*N*-{[(2'*S*,5'*R*,6'*S*)-5'-{2-[(3,3,4,4,5,5,6,6,7,7,8,8,9,9,10,10,10-heptafluorodecyl)-4-methylphenylsulfonamido]methyl}allyloxy)-6'-methoxy-5',6'-dihydro-2*H*-pyran-2'-yl]methyl}-2-nitrobenzenesulfonamide S10**

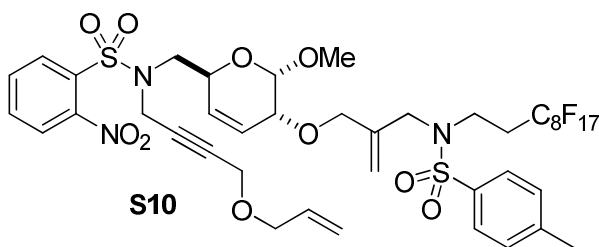

Following general procedure **B**, diethyl azodicarboxylate (133  $\mu\text{L}$ , 0.72 mmol), sulfonamide **22** (226 mg, 0.72 mmol) and alcohol **1** (150 mg, 0.18 mmol) gave the crude product after 3 hours. The crude product was purified by Fluorous Solid Phase Extraction; 2 g cartridge, loading with <400  $\mu\text{L}$ , eluting with 80:20 MeOH–H<sub>2</sub>O followed by MeOH to give the fluorous fraction, which was purified further by flash chromatography, eluting with 80:20 petrol–EtOAc, to give the *sulfonamide* **S10** (198 mg, 96%, 64% purity by HPLC) as a colourless oil,  $R_f$  0.35 (60:40 petrol–EtOAc);  $[\alpha]_D^{20}$  –15.2 ( $c$  1.00 in chloroform);  $\delta_H$  (500 MHz, CDCl<sub>3</sub>) 8.12–8.07 (1H, m, nosyl 3-H), 7.73–7.63 (5H, m, Ar), 7.60–7.43 (1H, m, nosyl 5-H), 7.35 (2H, d,  $J$  8.2, tosyl 3-H and 5-H), 5.84 (1H, ddt,  $J$  17.2, 10.2 and 1.5, 4-*C* allyl 2-H), 5.80–5.72 (2H, m, 3'-H and 4'-H), 5.31 (1H, br. s, NCH<sub>2</sub>C=CH<sub>A</sub>), 5.25 (1H, app. dq,  $J$  17.2 and 1.5, 4-*C* allyl 3-H<sub>A</sub>), 5.21 (1H, app. dq,  $J$  10.2 and 1.5, 4-*C* allyl 3-H<sub>B</sub>), 5.14 (1H, br. s, NCH<sub>2</sub>C=CH<sub>B</sub>), 4.85 (1H, br. d,  $J$  3.8, 6'-H), 4.44–4.34 (3H, m, 4-H and 2'-H), 4.05–3.99 (5H, m, 1-H, 5'-COCH<sub>2</sub> and 5'-H), 3.91 (2H, dt,  $J$  5.6 and 1.5, 4-*C* allyl 1-H), 3.80 (2H, br. s, NCH<sub>2</sub>CCH<sub>2</sub>), 3.66 (1H, dd,  $J$  15.1 and 3.3, 2'-CCH<sub>A</sub>), 3.54 (1H, dd,  $J$  15.1 and 7.4, 2'-CCH<sub>B</sub>), 3.44 (3H, s, OMe), 3.42–3.34 (2H, m, CF<sub>2</sub>CH<sub>2</sub>CH<sub>2</sub>), 2.45 (3H, s, tosyl Me) and 2.43–4.28 (2H, m, CF<sub>2</sub>CH<sub>2</sub>);  $\delta_C$  (75 MHz, CDCl<sub>3</sub>) 148.6 (nosyl 2-C), 144.4 (tosyl 4-C), 140.9 (NCH<sub>2</sub>CCH<sub>2</sub>), 136.2 (tosyl 1-C), 134.2 (nosyl 1-C), 134.1 (4-*C* allyl-2-C), 133.6 (nosyl 3-C), 132.0, 131.7 (nosyl 4-C and 6-C), 130.4 (tosyl 3-C and 5-C), 127.6 (tosyl 2-C and 6-C), 127.4 and 126.1 (3'-C and 4'-C), 124.5 (nosyl 5-C), 118.3 (4-*C* allyl 3-C), 117.6 (NCH<sub>2</sub>C=CH<sub>2</sub>), 97.1 (6'-C), 82.1 and 80.1 (2-C and 3-C), 72.1 (5'-C), 70.9 (4-*C* allyl 1-C), 69.8 (5-COCH<sub>2</sub>), 68.8 (2'-C), 57.5 (4-C), 56.2 (OMe), 52.1 (NCH<sub>2</sub>CCH<sub>2</sub>), 50.4 (2'-CCH<sub>2</sub>), 40.8 (CF<sub>2</sub>CH<sub>2</sub>CH<sub>2</sub>), 39.2 (1-C), 31.0 (t,  $^2J_{C-F}$  21.0, CF<sub>2</sub>CH<sub>2</sub>), 21.9 (tosyl Me);  $\nu_{\text{max}}/\text{cm}^{-1}$  (film); 2927, 2857, 1728, 1597, 1545 and 1439;  $m/z$  (ES<sup>+</sup>) 1144.2 ([M + Na]<sup>+</sup> 100%); found  $MNa^+$  1144.1776, C<sub>41</sub>H<sub>40</sub>F<sub>17</sub>N<sub>3</sub>O<sub>10</sub>S<sub>2</sub> requires  $MNa$  1144.1781.

***N*-{[(*R*)-5-{(*S*)-[(*S*)-5'-(2'',5''-dihydrofuran-3''-yl)-1'-(2-nitrophenylsulfonyl)-1',2',3',6'-tetrahydropyridin-3'-yloxy](methoxy)methyl}-2,5-dihydrofuran-3-yl]methyl}-*N*-(3,3,4,4,5,5,6,6,7,7,8,8,9,9,10,10,10-heptafluorodecyl)-4-methylbenzenesulfonamide **29** (R = R<sup>F</sup>)**

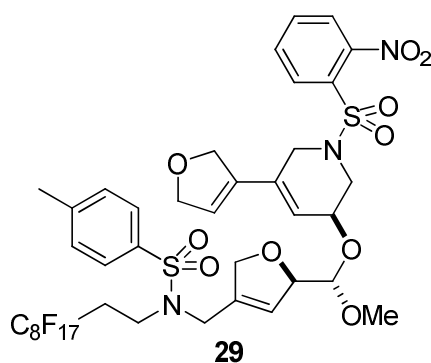

Following general procedure **C**, **HG II** (11 mg, 5 mol%) and sulfonamide **S10** (360 mg, 0.32 mmol) gave the crude product after 3 days. Purification by Fluorous Solid Phase Extraction; loading with <400  $\mu$ L DMF, eluting with 80:20 MeOH–H<sub>2</sub>O followed by MeOH, gave the fluorous fraction. Further purification by flash chromatography, eluting with 60:40 petrol–EtOAc, gave the sulfonamide **29** (R = R<sup>F</sup>) (179 mg, 51%) as a colourless oil,  $R_f$  0.29 (80:20 petrol–EtOAc);  $[\alpha]_D^{20} +6.4$  ( $c$  1.00 in chloroform);  $\delta_H$  (500 MHz, CDCl<sub>3</sub>) 8.07-8.03 (1H, m, nosyl 3-H), 7.74-7.68 (4H, m, Ar), 7.66-7.62 (1H, m, nosyl 5-H), 7.35 (2H, d,  $J$  8.1, tosyl 3-H and 5-H), 5.90 (1H, s, 4''-H), 5.71 (1H, br. s, 4-H), 5.61-5.59 (1H, m, 4'-H), 4.75 (4H, s, 2''-H and 5''-H), 4.72-4.68 (1H, m, 5-H), 4.52 (1H, ddd,  $J$  12.8, 5.6 and 1.7, 2-H<sub>A</sub>), 4.46-4.43 (1H, m, 2-H<sub>B</sub>), 4.43-4.37 (1H, m, 3'-H), 4.35 (1H, d,  $J$  5.6, CHOMe), 4.14-4.12 (1H, m, 6'-H<sub>A</sub>), 3.96-3.91 (3H, m, 3-CCH<sub>2</sub>N and 6'-H<sub>B</sub>), 3.89 (1H, dd,  $J$  12.8 and 5.6, 2'-H<sub>A</sub>), 3.42-3.38 (5H, m, OMe and CF<sub>2</sub>CH<sub>2</sub>CH<sub>2</sub>), 3.13 (1H, dd,  $J$  12.8 and 7.7, 2'-H<sub>B</sub>) and 2.50-2.37 (5H, m, tosyl Me and CF<sub>2</sub>CH<sub>2</sub>);  $\delta_C$  (75 MHz, CDCl<sub>3</sub>) 148.8 (nosyl 2-C), 144.6 (tosyl 4-C), 138.5 (3-C), 136.4 (3''-C), 136.1 (tosyl 1-C), 134.2 (nosyl 1-C), 132.3, 132.1 (nosyl 3-C and 4-C), 131.3 (tosyl 3-C and 5-C), 130.4 (nosyl 6-C), 129.7 (5'-C), 127.6 (tosyl 2-C and 6-C), 125.7 (4-C), 125.3 (4'-C), 124.6 (nosyl 5-C), 123.2 (4''-C), 105.6 (CHOMe), 87.34 (5-C), 77.6 (2''-C or 5''-C), 76.1 (2-C), 75.0 (2''-C or 5''-C), 69.6 (3'-C), 56.6 (OMe), 47.3 (2'-C), 46.3 (3-CCH<sub>2</sub>N), 45.1 (6'-C), 40.7 (CF<sub>2</sub>CH<sub>2</sub>CH<sub>2</sub>), 31.2 (t,  $^2J_{C-F}$  21.5, CF<sub>2</sub>CH<sub>2</sub>) and 21.9 (tosyl Me);  $\nu_{max}/cm^{-1}$  (film) 2918, 2850, 1751, 1597, 1546 and 1455;  $m/z$  (ESI<sup>+</sup>) 1116.1 (M + Na<sup>+</sup> 100%); found MNa<sup>+</sup> 1116.1465, C<sub>39</sub>H<sub>36</sub>F<sub>17</sub>N<sub>3</sub>O<sub>10</sub>S<sub>2</sub> requires  $MNa$  1116.1468.

(*S*)-5-(2',5'-dihydrofuran-3'-yl)-1-(2-nitrophenylsulfonyl)-1,2,3,6-tetrahydropyridin-3-ol **29** (R = H)

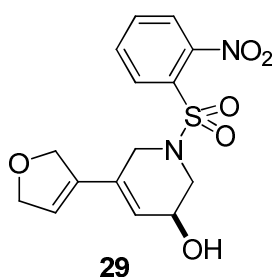

Following general procedure **D**, sulfonamide **29** (R = R<sup>F</sup>) (19 mg, 0.012 mmol) and 3% trifluoroacetic acid gave the crude product after 16 hours. Purification by Fluorous Solid Phase Extraction; 2 g cartridge, loading with <400  $\mu$ L DMF, with 80:20 MeOH–H<sub>2</sub>O, gave the organic fraction. Further purification by flash chromatography, eluting with 70:30 petrol–EtOAc, gave the alcohol **29** (R = H) (4 mg, 67%) as a colourless oil,  $R_f$  0.47 (EtOAc);  $[\alpha]_D^{20} +30.0$  ( $c$  1.00 in chloroform);  $\delta_H$  (500 MHz, CDCl<sub>3</sub>) 8.10-8.07 (1H, m, nosyl 3-H), 7.77-7.70 (2H, m, nosyl 4-H and 6-H), 7.67-7.64 (1H, m, nosyl 5-H), 5.97 (1H, br. s, 4'-H), 5.66-5.63 (1H, m, 4-H), 4.82-4.72 (4H,

m, 2'-H and 5'-H), 4.34-4.30 (1H, m, 3-H), 4.22 (1H, br. d,  $J$  16.4, 6-H<sub>A</sub>), 3.93 (1H, br. d,  $J$  16.4, 6-H<sub>B</sub>), 3.51 (1H, dd,  $J$  13.1 and 4.4, 2-H<sub>A</sub>), 3.45 (1H, dd,  $J$  13.1 and 3.9, 2-H<sub>B</sub>) and 2.03 (1H, br. s, OH);  $\delta_C$  (75 MHz, CDCl<sub>3</sub>) 148.2 (nosyl 2-C), 135.9 (3'-C), 133.9 (nosyl 1-C), 131.7, 131.4 (nosyl 3-C and 4-C), 131.1 (nosyl 6-C), 129.8 (5-C), 124.9 (4-C), 124.2 (nosyl 5-C), 123.3 (4'-C), 76.5 (2'-C or 5'-C), 74.5 (2'-C or 5'-C), 63.2 (3-C), 49.5 (2-C) and 44.7 (6-C);  $\nu_{\max}/\text{cm}^{-1}$  (film) 3344 (br), 2928, 2918, 2849, 1746, 1567 and 1541;  $m/z$  (ESI<sup>+</sup>) 370.1 ([M + NH<sub>4</sub>]<sup>+</sup> 100%), 375.1.2 ([M + Na]<sup>+</sup> 68%); found MNa<sup>+</sup> 375.0626, C<sub>15</sub>H<sub>16</sub>N<sub>2</sub>O<sub>6</sub>S requires MNa 375.0621.

***N*-[(1*S*,4*S*)-4-(Alloxy)cyclopent-2-enyl]-*N*-[{(2'*S*,5'*R*,6'*S*)-5'-[2-[[*N*-(3,3,3,4,4,5,5,6,6,7,7,8,8,9,9,10,10,10-heptafluorodecyl)-4-methylphenylsulfonamido]methyl]allyloxy]-6'-methoxy-5',6',-dihydro-2*H*-pyran-2'-yl]methyl]-2-nitrobenzenesulfonamide **S11****

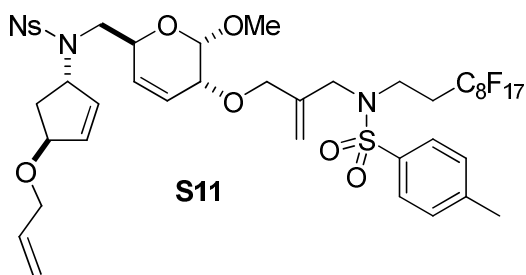

Following general procedure **B**, diethyl azodicarboxylate (72  $\mu\text{L}$ , 0.39 mmol), sulfonamide **18** (100 mg, 0.10 mmol) and alcohol **23** (55 mg, 0.39 mmol) gave the crude product after 3 hours.

Purification by Fluorous Solid Phase Extraction; 2 g cartridge, loading with <200  $\mu\text{L}$  dichloromethane, eluting with 80:20 MeOH–H<sub>2</sub>O followed by MeOH, gave the fluorous fraction, the *sulfonamide* **S11** (110 mg, 98%, 83% purity by HPLC) as a colourless foam,  $R_f$  0.83 (40:60 petrol–EtOAc);  $\delta_H$  (500 MHz, CDCl<sub>3</sub>) 8.11-8.08 (1H, m, nosyl 3-H), 7.74-7.63 (5H, m, Ar), 7.34 (2H, d,  $J$  8.1, tosyl 3-H and 5-H), 6.11-6.08 (1H, m, 3-H), 5.89 (1H, ddd,  $J$  17.1, 10.8 and 5.6, allyl 2-H), 5.80-5.77 (1H, m, 2-H), 5.74 (2H, s, 3'-H and 4'-H), 5.30 (1H, s, NCH<sub>2</sub>C=CH<sub>A</sub>), 5.27 (1H, app. dq,  $J$  17.2 and 1.4, allyl 3-H<sub>A</sub>), 5.22-5.15 (2H, m, allyl 3-H<sub>B</sub> and 1-H), 5.14 (1H, s, NCH<sub>2</sub>C=CH<sub>B</sub>), 4.82 (1H, d,  $J$  3.8, 6'-H), 4.70-4.66 (1H, m, 4-H), 4.32-4.28 (1H, m, 2'-H), 4.05-3.92 (5H, m, allyl 1-H, 5'-COCH<sub>2</sub> and 5'-H), 3.82 (1H, d,  $J$  15.0, NCH<sub>A</sub>CCH<sub>2</sub>), 3.78 (1H, d,  $J$  15.0, NCH<sub>B</sub>CCH<sub>2</sub>), 3.39 (3H, s, OMe), 3.39-3.35 (2H, m, CF<sub>2</sub>CH<sub>2</sub>CH<sub>2</sub>), 3.27 (1H, dd,  $J$  15.4 and 3.7, 2'-CCH<sub>A</sub>), 3.17 (1H, dd,  $J$  15.4 and 8.6, 2'-CCH<sub>B</sub>), 2.44 (3H, s, tosyl Me), 2.43-2.32 (2H, m, CF<sub>2</sub>CH<sub>2</sub>), 2.31-2.24 (1H, m, 5-H<sub>A</sub>) and 2.15 (1H, ddd,  $J$  14.8, 8.3 and 2.9, 5-H<sub>B</sub>);  $\delta_C$  (75 MHz, CDCl<sub>3</sub>) 148.6 (nosyl 2-C), 144.4 (tosyl 4-C), 141.0 (5'-COCH<sub>2</sub>C), 136.9 (2-C or 3-C), 136.1 (tosyl 1-C), 135.2 (allyl 2-C), 134.5 (2-C or 3-C), 134.2 (nosyl 1-C), 134.0 (nosyl 4-C), 132.0 (nosyl 3-C), 131.8 (nosyl 6-C), 130.3 (tosyl 3-C and 5-C), 127.64 (3'-C), 127.57 (tosyl 2-C and 6-C), 125.6 (4'-C), 124.6 (nosyl 5-C), 117.49 (5'-COCH<sub>2</sub>C=CH<sub>2</sub> or allyl 3-C), 117.46 (5'-COCH<sub>2</sub>C=CH<sub>2</sub> or allyl 3-C),

97.1 (6'-C), 83.0 (4-C), 72.2 (5'-C), 70.6 (allyl 1-C), 69.7 (5'-COCH<sub>2</sub>), 68.6 (2'-C), 64.9 (1-C); 56.1 (OMe), 52.1 (NCH<sub>2</sub>CCH<sub>2</sub>), 48.9 (2'-CCH<sub>2</sub>), 40.8 (CF<sub>2</sub>CH<sub>2</sub>CH<sub>2</sub>), 36.2 (5-C), 31.0 (CF<sub>2</sub>CH<sub>2</sub>) and 21.8 (tosyl Me);  $\nu_{\max}/\text{cm}^{-1}$  3080, 2986, 2929, 2862, 2252, 1746, 1597 and 1545;  $m/z$  (ESI<sup>+</sup>) 1158.2 ([M + Na]<sup>+</sup> 100%); found MNa<sup>+</sup> 1158.1947, C<sub>42</sub>H<sub>42</sub>F<sub>17</sub>N<sub>3</sub>O<sub>10</sub>S<sub>2</sub> requires MNa 1158.1932.

***N*-[*[(R)*-5-*[(S)*-{(3'*S*,6'*S*)-6'-*[(S)*-2'',5''-dihydrofuran-2''-yl]methyl]-1'-*(2*-nitrophenylsulfonyl)-1',2',3',6'-tetrahydropyridin-3'-yloxy}(methoxy)methyl]-2,5-dihydrofuran-3-yl]methyl]-*N*-(3,3,4,4,5,5,6,6,7,7,8,8,9,9,10,10,10-heptafluorodecyl)-4-methylbenzenesulfonamide **30** (R = R'<sup>F</sup>)**

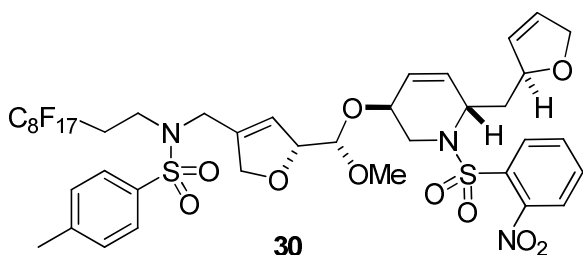

Following general procedure **C**, **HG II** (6 × 3 mg, 6 × 5 mol%) and sulfonamide **S11** (110 mg, 0.097 mmol) gave the crude product after 7 days. Purification by Fluorous Solid Phase Extraction; 2 g cartridge loading with <200  $\mu\text{L}$  dichloromethane, eluting with 80:20 MeOH–H<sub>2</sub>O followed by MeOH, gave the fluorous fraction (93 mg, 87%, 69% purity by HPLC). Further purification by flash chromatography, eluting with 70:30 petrol–EtOAc, gave the *sulfonamide 30* (R = R'<sup>F</sup>) (93 mg, 87%) as a colourless oil,  $R_f$  0.75 (50:50 petrol–EtOAc);  $\delta_{\text{H}}$  (500 MHz, CDCl<sub>3</sub>) 8.08 (1H, dd,  $J$  7.5 and 1.8, nosyl 3-H), 7.72–7.57 (5H, m, Ar), 7.35 (2H, dd,  $J$  8.1, tosyl 3-H and 5-H), 5.87–5.83 (2H, m, 3''-H and 4''-H), 5.79–5.75 (1H, m, 4'-H), 5.74–5.69 (2H, m, 5'-H and 4-H), 4.77–4.71 (1H, m, 2''-H), 4.69–4.65 (1H, m, 5-H), 4.62–4.55 (2H, m, 6'-H and 5''-H<sub>A</sub>), 4.51–4.45 (2H, m, 5''-H<sub>B</sub> and 2-H<sub>A</sub>), 4.42–4.37 (1H, m, 2-H<sub>B</sub>), 4.29 (1H, dd,  $J$  5.6, 5-CCHOMe), 4.16 (1H, dd,  $J$  13.8 and 6.2, 2'-H<sub>A</sub>), 4.13–4.08 (1H, m, 3'-H), 3.94 (2H, s, 3-CCH<sub>2</sub>N), 3.48–3.35 (2H, m, and CF<sub>2</sub>CH<sub>2</sub>), 3.34 (3H, s, OMe), 3.02 (1H, dd,  $J$  13.8 and 9.6, 2'-H<sub>B</sub>), 2.51–2.37 (5H, m, CF<sub>2</sub>CH<sub>2</sub>CH<sub>2</sub> and tosyl Me), 1.85 (1H, ddd,  $J$  14.2, 7.9 and 3.4, 6'-CCH<sub>A</sub>), 1.75–1.66 (1H, m, 6'-CCH<sub>B</sub>);  $\delta_{\text{C}}$  (75 MHz, CDCl<sub>3</sub>) 148.3 (nosyl 2-C), 144.6 (tosyl 4-C), 138.3 (3-C), 136.1 (tosyl 1-C), 134.2 (nosyl 1-C), 133.9 (nosyl 4-C), 132.0 (nosyl 3-C), 131.6 (nosyl 6-C), 130.8 (3''-C or 4''-C), 130.4 (tosyl 3-C and 5-C); 129.7 (4'-C or 5'-C), 128.4 (4'-C or 5'-C); 127.55 (tosyl 2-C and 6-C), 127.4 (3''-C or 4''-C), 125.9 (4-C), 124.3 (nosyl 5-C), 106.0 (5-CCHOMe), 87.4 (5-C), 83.1 (2''-C), 76.0 (2-C), 75.2 (5''-C), 69.0 (3'-C), 56.3 (OMe), 52.7 (6'-C), 46.1 (3-CCH<sub>2</sub>N), 43.4 (2'-C), 40.6 (CF<sub>2</sub>CH<sub>2</sub>), 40.4 (6'-CCH<sub>2</sub>), 31.2 (CF<sub>2</sub>CH<sub>2</sub>) and 21.9 (tosyl Me);  $\nu_{\max}/\text{cm}^{-1}$  3093, 2986, 2929, 2854, 2254, 1597 and 1546;  $m/z$  (ESI<sup>+</sup>) 1130.2 ([M + Na]<sup>+</sup> 100%); found MNa<sup>+</sup> 1130.1605, C<sub>40</sub>H<sub>38</sub>F<sub>17</sub>N<sub>3</sub>O<sub>10</sub>S<sub>2</sub> requires MNa 1130.1619.

**(3*S*)-6*S*-[[(2'*S*)-2',5'-dihydrofuran-2'-yl]methyl]-1-(2-nitrophenylsulfonyl)-1,2,3,6-tetrahydropyridin-3-ol **30** (R = H)**

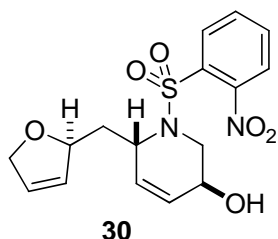

Following general procedure **D**, sulfonamide **30** (R = R'<sup>F</sup>) (47 mg, 0.042 mmol) and 3% trifluoroacetic acid gave the crude product after 16 hours. Purification by Fluorous Solid Phase Extraction; 2 g cartridge loading with <400  $\mu$ L DMF, with 80:20 MeOH–H<sub>2</sub>O, gave the organic fraction. Further purification by flash chromatography, eluting with 70:30 petrol–EtOAc, gave the *alcohol* **30** (R = H) (6 mg, 37%) as a colourless oil, *R*<sub>f</sub> 0.75 (EtOAc);  $[\alpha]_D^{20}$  –126.8 (*c* 1.00 in chloroform);  $\delta_H$  (500 MHz, CDCl<sub>3</sub>) 8.11–8.06 (1H, m, nosyl 3-H), 7.71–7.64 (2H, m, nosyl 4-H and 6-H), 7.62–7.59 (1H, m, nosyl 5-H), 5.90–5.84 (2H, m, 4-H and 3'-H), 5.76–5.70 (2H, m, 5-H and 4'-H), 4.80–4.73 (1H, m, 2'-H), 4.63–4.54 (2H, m, 6-H and 5'-H<sub>A</sub>), 4.51–4.45 (1H, m, 5'-H<sub>B</sub>), 4.22–4.14 (1H, m, 3-H), 4.10 (1H, dd, *J* 13.8 and 6.2, 2-H<sub>A</sub>), 2.99 (1H, dd, *J* 13.8 and 9.8, 2-H<sub>B</sub>), 1.87 (1H, ddd, *J* 14.2, 7.6 and 3.4, 6-CCH<sub>A</sub>), 1.78–1.69 (2H, m, 6-CCH<sub>B</sub> and OH);  $\delta_C$  (75 MHz, CDCl<sub>3</sub>) 147.8 (nosyl 2-C), 133.8 (nosyl 1-C), 133.5 (nosyl 4-C), 131.6 (nosyl 6-C), 131.2 (nosyl 3-C), 130.3 (4-C or 3'-C), 129.4 (5-C or 4'-C), 129.3 (5-C or 4'-C), 127.0 (4-C or 3'-C), 124.1 (nosyl 5-C), 82.8 (2'-C), 74.8 (5'-C), 62.8 (3-C), 52.3 (6-C), 45.0 (2-C), 40.2 (6-CCH<sub>2</sub>);  $\nu_{\max}/\text{cm}^{-1}$  (film) 3390 (br), 3399 (br), 2921, 2853, 1590, 1544, 1454 and 1439; *m/z* (ESI<sup>+</sup>) 389.1 ([M + Na]<sup>+</sup> 100%); found *MNa*<sup>+</sup> 389.0768, C<sub>16</sub>H<sub>18</sub>N<sub>2</sub>O<sub>6</sub>S requires *MNa* 389.0778.

***N*-[[(2*S*,5*R*,6*S*)-5-{2-[(3,3,4,4,5,5,6,6,7,7,8,8,9,9,10,10,10-heptafluorodecyl)-4-methylphenylsulfonamido]methyl}allyloxy)-6-methoxy-5,6-dihydro-2*H*-pyran-2-yl]methyl]-2-nitro-*N*-(prop-2'-ynyl)benzenesulfonamide **S12****

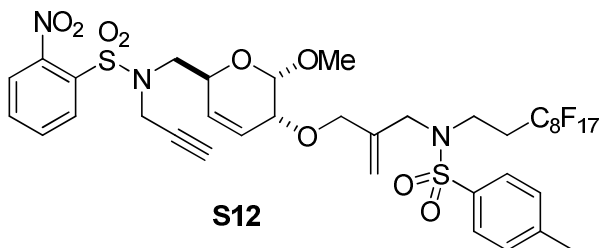

Following general procedure **B**, diethyl azodicarboxylate (72  $\mu$ L, 0.39 mmol), sulfonamide **18** (100 mg, 0.10 mmol) and propargyl alcohol **24** (23  $\mu$ L, 0.39 mmol) gave the crude product after 3 hours.

Purification by Fluorous Solid Phase Extraction; 2 g cartridge, loading with <200  $\mu$ L dichloromethane, eluting with 80:20 MeOH–H<sub>2</sub>O followed by MeOH, gave the fluorous fraction, *sulfonamide S12* (102 mg, 98%, 87% purity by HPLC) as a colourless foam,  $R_f$  0.83 (40:60 petrol–EtOAc);  $\delta_H$  (500 MHz, CDCl<sub>3</sub>) 8.08 (1H, d,  $J$  7.5, nosyl 3-H), 7.75-7.62 (5H, m, Ar), 7.34 (2H, d,  $J$  7.8, tosyl 3-H and 5-H), 5.77 (1H, d,  $J$  10.8, 3-H), 5.74 (1H, d,  $J$  10.8, 4-H), 5.30 (1H, s, 5-COCH<sub>2</sub>C=CH<sub>A</sub>), 5.14 (1H, s, 5-COCH<sub>2</sub>C=CH<sub>B</sub>), 4.85 (1H, d,  $J$  3.3, 6-H), 4.46-4.30 (3H, m, 1'-H and 2-H); 4.03-4.01 (3H, m, 5-COCH<sub>2</sub> and 5-H), 3.82 (1H, d,  $J$  15.2, NCH<sub>A</sub>CCH<sub>2</sub>), 3.78 (1H, d,  $J$  15.2, NCH<sub>B</sub>CCH<sub>2</sub>), 3.67 (1H, dd,  $J$  15.1 and 2.1, 2-CCH<sub>A</sub>), 3.55 (1H, dd,  $J$  15.1 and 7.7, 2-CCH<sub>B</sub>), 3.43 (3H, s, OMe), 3.41-3.34 (2H, m, CF<sub>2</sub>CH<sub>2</sub>CH<sub>2</sub>), 2.44 (3H, s, tosyl Me), 2.44-2.32 (2H, m, CF<sub>2</sub>CH<sub>2</sub>), 2.16 (1H, t,  $J$  2.4, 3'-H);  $\delta_C$  (75 MHz, CDCl<sub>3</sub>) 148.6 (nosyl 2-C), 144.4 (tosyl 4-C), 140.9 (5-COCH<sub>2</sub>C), 136.1 (tosyl 1-C), 134.2 (nosyl 1-C), 133.5 (nosyl 6-C), 132.0 (nosyl 3-C), 131.6 (nosyl 4-C), 130.3 (tosyl 3-C and 5-C), 127.6 (tosyl 2-C and 6-C), 127.4 (3-C), 126.1 (4-C), 124.5 (nosyl 5-C), 117.5 (5-COCH<sub>2</sub>C=CH<sub>2</sub>), 97.1 (6-C), 77.6 (3'-C), 74.2 (2'-C), 72.1 (5-C), 69.7 (5-COCH<sub>2</sub>), 68.8 (2-C), 56.2 (OMe), 52.1 (NCH<sub>2</sub>CCH<sub>2</sub>), 50.3 (2-CCH<sub>2</sub>), 40.8 (CF<sub>2</sub>CH<sub>2</sub>), 38.9 (1'-C), 31.0 (CF<sub>2</sub>CH<sub>2</sub>CH<sub>2</sub>), 21.8 (tosyl Me);  $\nu_{max}/cm^{-1}$  3289, 2989, 2928, 2869, 1737, 1597 and 1546;  $m/z$  (ES<sup>+</sup>) 1074.1 ([M + Na]<sup>+</sup> 100%) and 1069.2 ([M + NH<sub>4</sub>]<sup>+</sup> 40%); found  $MNa^+$  1074.1316, C<sub>37</sub>H<sub>34</sub>F<sub>17</sub>N<sub>3</sub>O<sub>9</sub>S<sub>2</sub> requires  $MNa$  1074.1357.

*N*-(3,3,4,4,5,5,6,6,7,7,8,8,9,9,10,10,10-heptafluorodecyl)-*N*-[*(R)*-5-[(*S*)-methoxy{(*S*)-1'-(nitrophenylsulfonyl)-5'-vinyl-1',2',3',6'-tetrahydropyridin-3'-yloxy}methyl]-2,5-dihydrofuran-3-yl]methyl]-4-methylbenzenesulfonamide **31** (R = R<sup>F</sup>)

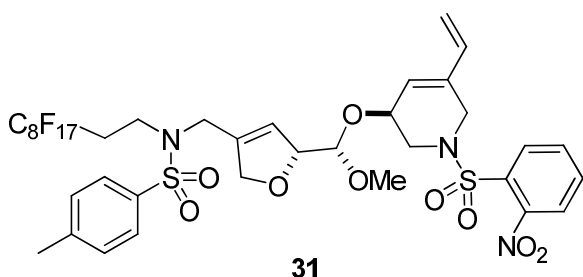

Sulfonamide **S12** (110 mg, 0.10 mmol) was dissolved in dichloromethane (60 mL) and the solution was de-gassed. Ethylene was bubbled through the solution for 10 minutes and the solution was heated at reflux under an atmosphere of ethylene. Following general procedure **C** under an atmosphere of ethylene, **HG II** (3 mg, 5 mol%) gave the crude product after 4 days. Purification by Fluorous Solid Phase Extraction; 2 g cartridge, loading with <200  $\mu$ L DCM, eluting with 80:20 MeOH–H<sub>2</sub>O followed by MeOH, gave the fluorous fraction (83%, 65% purity by HPLC), which was further purified by flash chromatography, eluting with 75:25 petrol–EtOAc, to give the *sulfonamide 31* (R = R<sup>F</sup>) (58 mg, 53%) as a colourless oil,  $R_f$  0.73 (50:50 petrol–EtOAc),

$[\alpha]_D^{20} +29.2$  (*c* 2.00 in chloroform);  $\delta_H$  (500 MHz,  $CDCl_3$ ) 8.06-8.02 (1H, m, nosyl 3-H), 7.74-7.77 (4H, m, Ar), 7.65-7.62 (1H, m, nosyl 5-H), 7.35 (2H, d, *J* 8.0, tosyl 3-H and 5-H), 6.29 (1H, dd, *J* 17.8 and 11.1, 5'-CCH), 5.86 (1H, br. s, 4'-H), 5.71 (1H, br. s, 4-H), 5.20 (1H, d, *J* 17.8, 5'-CCHCH<sub>A</sub>), 5.14 (1H, d, *J* 11.1, 5'-CCHCH<sub>B</sub>), 4.73-4.69 (1H, m, 5-H), 4.54-4.49 (1H, m, 2-H<sub>A</sub>), 4.45-4.40 (1H, m, 2-H<sub>B</sub>), 4.40-4.35 (2H, m, 5-CCHOMe and 3'-H), 4.09 (1H, d, *J* 16.5, 6'-H<sub>A</sub>), 3.93 (2H, s, 3-CCH<sub>2</sub>N), 3.90-3.83 (2H, m, 6'-H<sub>B</sub> and 2'-H<sub>A</sub>), 3.44-3.38 (5H, m, OMe and CF<sub>2</sub>CH<sub>2</sub>CH<sub>2</sub>), 3.13 (1H, dd, *J* 12.7 and 7.4, 2-H<sub>B</sub>) and 2.50-2.38 (5H, m, tosyl Me and CF<sub>2</sub>CH<sub>2</sub>);  $\delta_C$  (75 MHz,  $CDCl_3$ ) 148.8 (nosyl 2-C), 144.6 (tosyl 4-C), 138.4 (3-C), 136.1 (tosyl 1-C), 135.7 (4'-C), 135.0 (5'-C), 134.2 (nosyl 1-C), 132.3 (nosyl 4-C), 132.1 (nosyl 3-C), 131.2 (nosyl 6-C), 130.4 (tosyl 3-C and 5-C), 128.0 (5'-CCH), 127.6 (tosyl 2-C and 6-C), 125.8 (4-C), 124.6 (nosyl 5-C), 114.7 (5'-CCHCH<sub>2</sub>), 105.7 (5-CCHOMe), 87.4 (5-C), 76.1 (2-C), 69.9 (3'-C), 56.6 (OMe), 47.5 (6'-C), 46.3 (3-CCH<sub>2</sub>N), 44.3 (2'-C), 40.6 (CF<sub>2</sub>CH<sub>2</sub>), 31.2 (CF<sub>2</sub>CH<sub>2</sub>CH<sub>2</sub>) and 21.9 (tosyl Me);  $\nu_{max}/cm^{-1}$  3094, 2917, 2854, 2255, 1598 and 1546; *m/z* (ES<sup>+</sup>) 1074.1 ([M + Na]<sup>+</sup> 100%); found MNa<sup>+</sup> 1074.1334, C<sub>37</sub>H<sub>34</sub>F<sub>17</sub>N<sub>3</sub>O<sub>9</sub>S<sub>2</sub> requires MNa 1074.1357

**(S)-1-(2-nitrophenylsulfonyl)-5-vinyl-1,2,3,6-tetrahydropyridin-3-ol 31** (R = H)

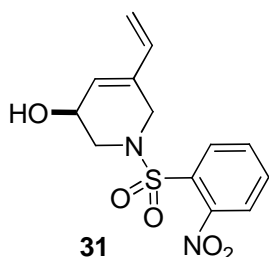

Following general procedure **D**, the sulfonamide **31** (R = R'<sup>F</sup>) (30 mg, 29  $\mu$ mol) and 3% trifluoroacetic acid gave the crude product after 16 hours. Purification by Fluorous Solid Phase Extraction; 2 g cartridge loading with <400  $\mu$ L DMF, with 80:20 MeOH–H<sub>2</sub>O, gave the organic fraction. Further purification by flash chromatography, eluting with 50:50 petrol–EtOAc, gave the *alcohol 31* (R = H) (2 mg, 23%) as a colourless oil, *R<sub>f</sub>* 0.78 (petrol–EtOAc);  $[\alpha]_D^{20} +8.0$  (*c* 0.25 in chloroform);  $\delta_H$  (500 MHz,  $CDCl_3$ ) 8.09-8.06 (1H, m, nosyl 3-H), 7.76-7.70 (2H, m, nosyl 4-H and nosyl 6-H), 7.66-7.63 (1H, m, nosyl 5-H), 6.31 (1H, dd, *J* 17.9 and 11.0, vinyl 1-H), 5.92-5.89 (1H, m, 4-H), 5.27 (1H, d, *J* 17.9, vinyl 2-H<sub>A</sub>), 5.19 (1H, d, *J* 11.0, vinyl 2-H<sub>B</sub>), 4.33-4.27 (1H, m, 3-H), 4.18 (1H, d, *J* 16.7, 6-H<sub>A</sub>), 3.85 (1H, d, *J* 16.7, 6-H<sub>B</sub>), 3.53 (1H, dd, *J* 13.0 and 4.1, 2-H<sub>A</sub>), 3.42 (1H, dd, *J* 13.0 and 3.6, 2-H<sub>B</sub>), 1.97 (1H, br. d, *J* 8.4, OH);  $\delta_C$  (75 MHz,  $CDCl_3$ ) 148.4 (nosyl 2-C), 135.34 (vinyl 1-C), 135.25 (nosyl 1-C), 134.0 (nosyl 6-C), 131.7 (nosyl 3-C), 131.6 (5-C), 131.2 (nosyl 4-C), 127.6 (4-C), 124.3 (nosyl 5-C), 115.0 (vinyl 2-C), 63.6 (3-C), 49.9 (2-C), 44.0 (6-C);  $\nu_{max}/cm^{-1}$  (film) 3380 (br), 3095 (br), 3095, 2918, 2850, 1543, 1453 and 1439; *m/z* (ESI<sup>+</sup>) 333.1 ([M + Na]<sup>+</sup> 100%); found MNa<sup>+</sup> 333.0501, C<sub>13</sub>H<sub>14</sub>N<sub>2</sub>O<sub>5</sub>S requires MNa 333.0516.



***N*-(2-[[*(2S,3R,6S)*]-6-(Alloxymethyl)-2-methoxy-3,6-dihydro-2*H*-pyran-3-yloxy]methyl)allyl)-*N*-(3,3,4,4,5,5,6,6,7,7,8,8,9,9,10,10,10-heptafluorodecyl)-4-methylbenzenesulfonamide **S13****

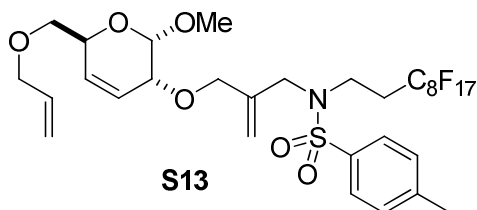

Sodium hydride (9.6 mg, 0.24 mmol) was added portionwise to a stirred solution of alcohol **1** (100 mg, 0.12 mmol) in tetrahydrofuran (2 mL) at 0 °C. After 30 minutes, allyl bromide (21 µL, 0.24 mmol) was added and the reaction mixture was allowed to warm to room temperature and stirred for 16 hours. Methanol (2 mL) was subsequently added and the solvents were removed under reduced pressure. Purification by Fluorous Solid Phase Extraction; 2 g cartridge, loading with <400 µL DMF, eluting with 80:20 MeOH–H<sub>2</sub>O followed by MeOH, gave the fluorous fraction, the *sulfonamide* **S13** (75 mg, 72%, 93% purity by HPLC) as a colourless oil, *R<sub>f</sub>* 0.80 (70:30 petrol–EtOAc); δ<sub>H</sub> (500 MHz, CDCl<sub>3</sub>) 7.70 (2H, d, *J* 8.1, tosyl 2-H and 6-H), 7.33 (2H, d, *J* 8.1, tosyl 3-H and 5-H), 5.92 (1H, ddt, *J* 17.1, 10.3 and 5.6, allyl 2-H), 5.79 (1H, app. d, *J* 10.7, 5-H), 5.75 (1H, app. d, *J* 10.7, 4-H), 5.30 (1H, br. s, NCH<sub>2</sub>C=CH<sub>A</sub>), 5.28 (1H, app. dq, *J* 17.1 and 1.7, allyl 3-H<sub>A</sub>), 5.20 (1H, app. dq, *J* 10.3 and 1.7, allyl 3-H<sub>B</sub>), 5.13 (1H, br. s, NCH<sub>2</sub>C=CH<sub>B</sub>), 5.00 (1H, br. d, *J* 3.9, 2-H), 4.35–4.30 (1H, m, 6-H), 4.10–4.07 (1H, m, 3-H), 4.07–4.04 (2H, m, allyl 1-H), 4.03 (2H, br. s, 3-COCH<sub>2</sub>), 3.84 (1H, app. d, *J* 15.0, NCH<sub>A</sub>CCH<sub>2</sub>), 3.77 (1H, app. d, *J* 15.0, NCH<sub>B</sub>CCH<sub>2</sub>), 3.52 (3H, s, OMe), 3.51–3.49 (2H, m, 6'-CCH<sub>2</sub>) and 3.41–3.35 (2H, m, CF<sub>2</sub>CH<sub>2</sub>CH<sub>2</sub>) and 2.44–2.32 (5H, m, tosyl Me and CF<sub>2</sub>CH<sub>2</sub>); δ<sub>C</sub> (75 MHz, CDCl<sub>3</sub>) 144.3 (tosyl 4-C), 141.0 (NCH<sub>2</sub>CCH<sub>2</sub>), 136.2 (tosyl 1-C), 134.9 (allyl 2-C), 130.3 (tosyl 3-C and 5-C), 128.0 (5-C), 127.6 (tosyl 2-C and 6-C), 125.2 (4-C), 117.7 and 117.3 (allyl 3-C and NCH<sub>2</sub>C=CH<sub>2</sub>), 97.3 (2-C), 72.9 (allyl 1-C), 72.5 (3-C), 72.2 (6-CCH<sub>2</sub>), 69.7 (3-COCH<sub>2</sub>), 68.4 (6-C), 56.2 (OMe), 52.0 (NCH<sub>2</sub>CCH<sub>2</sub>), 40.8 (CF<sub>2</sub>CH<sub>2</sub>CH<sub>2</sub>), 31.1 (t, <sup>2</sup>*J*<sub>C–F</sub> 21.8, CF<sub>2</sub>CH<sub>2</sub>), 21.9 (tosyl Me); ν<sub>max</sub>/cm<sup>–1</sup> (film); 2981, 2926, 2861, 1598 and 1494; *m/z* (ESI<sup>+</sup>) 887.2 ([M + NH<sub>4</sub>]<sup>+</sup> 100%); found MNa<sup>+</sup> 892.1559, C<sub>31</sub>H<sub>32</sub>F<sub>17</sub>NO<sub>6</sub>S requires MNa 892.1577.

***N*}-[[*(R)*]-5-[[*(S)*]-[(*S*)-3',6'-dihydro-2*H*-pyran-3'-yloxy](methoxy)methyl]-2,5-dihydrofuran-3-yl]methyl]-*N*-(3,3,4,4,5,5,6,6,7,7,8,8,9,9,10,10,10-heptafluorodecyl)-4-methylbenzenesulfonamide **32** (R = R'<sup>F</sup>)**

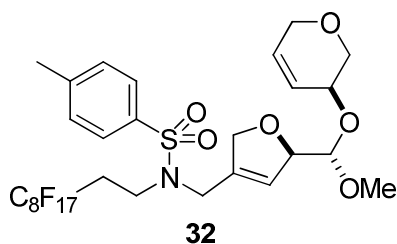

Following general procedure **C**, **HG II** ( $2 \times 2$  mg,  $2 \times 5$  mol%) and sulfonamide (45 mg, 0.05 mmol) gave the crude product after 2 days. Purification by Fluorous Solid Phase Extraction; loading with  $<400$   $\mu$ L DMF, eluting with 80:20 MeOH–H<sub>2</sub>O followed by MeOH, gave the fluorous fraction. Further purification by flash chromatography, eluting with 80:20 petrol–EtOAc, gave the *sulfonamide* **32** ( $R = R^F$ ) (22 mg, 51%) as a colourless oil,  $R_f$  0.45 (80:20 petrol–EtOAc);

$[\alpha]_D^{20} +12.4$  ( $c$  1.00 in chloroform);  $\delta_H$  (500 MHz, CDCl<sub>3</sub>) 7.69 (2H, d,  $J$  8.2, tosyl 2-H and 6-H), 7.34 (2H, d,  $J$  8.2, tosyl 3-H and 5-H), 5.95–5.92 (2H, m, 4'-H and 5'-H), 5.77–5.73 (1H, m, 4-H), 4.81–4.74 (1H, m, 5-H), 4.51 (1H, ddq,  $J$  12.8, 5.6 and 1.8, 2-H<sub>A</sub>), 4.47–4.39 (1H, m, 2-H<sub>B</sub>), 4.36 (1H, d,  $J$  5.1, CHOMe), 4.15–4.06 (3H, m, 3'-H and 6'-H), 3.95–3.90 (2H, m, 3-CCH<sub>2</sub>), 3.84 (1H, dd,  $J$  11.5 and 3.9, 2'-H<sub>A</sub>), 3.75 (1H, dd,  $J$  11.5 and 4.6, 2'-H<sub>B</sub>), 3.43–3.38 (5H, m, OMe and CF<sub>2</sub>CH<sub>2</sub>CH<sub>2</sub>) and 2.46–2.45 (5H, m, tosyl Me and CF<sub>2</sub>CH<sub>2</sub>);  $\delta_C$  (75 MHz, CDCl<sub>3</sub>) 144.5 (tosyl 4-C), 138.1 (3-C), 136.1 (tosyl 1-C), 130.4 (tosyl 3-C and 5-C), 130.3 (5'-C), 127.5 (tosyl 2-C and 6-C), 126.1 (4-C), 125.7 (4'-C), 105.2 (CHOMe), 87.4 (5-C), 76.1 (2-C), 68.6 (3'-C), 68.5 (2'-C), 65.5 (6'-C), 56.3 (OMe), 46.3 (3-CCH<sub>2</sub>N), 40.6 (CF<sub>2</sub>CH<sub>2</sub>CH<sub>2</sub>), 31.3 (CF<sub>2</sub>CH<sub>2</sub>, t,  $^2J_{C-F}$  21.4) and 21.9 (tosyl Me);  $\nu_{max}/cm^{-1}$  (film) 3093, 2956, 2924, 1741, 1644 and 1597  $m/z$  (ESI<sup>+</sup>) 864.1 (M + Na<sup>+</sup> 100%); found MNa<sup>+</sup> 864.1262, C<sub>29</sub>H<sub>28</sub>F<sub>17</sub>NO<sub>6</sub>S requires  $MNa$  864.1258.

### Further functionalisation of metathesis products

**(S)-N-Benzyl-5-[(S)-(R)-4'-{[N-(3,3,4,4,5,5,6,6,7,7,8,8,9,9,10,10,10-heptafluorodecyl)-4-methylsulfonamido]methyl}-2',5'-dihydrofuran-2'-yl](methoxymethoxy)-5,6-dihydropyridine-1(2H)-carboximide 33** ( $R = R^F$ )

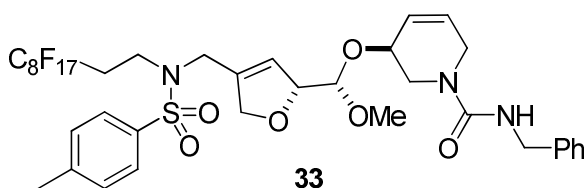

Thiophenol (5.3  $\mu$ L, 0.048 mmol) was added dropwise to a solution of sulfonamide **26** (25 mg, 0.024 mmol) and 1,8-diazabicyclo[5.4.0]undec-7-ene (7.3  $\mu$ L, 0.048 mmol) in acetonitrile (1.0 mL) and stirred at room temperature for 1 hour. Benzyl isocyanate (32 mg, 0.24 mmol) was added and

the reaction mixture was stirred for a further 2 hours. The solution was concentrated under nitrogen and purified by Fluorous Solid Phase Extraction; 2 g cartridge loading with <400  $\mu$ L DMF, eluting with 80:20 MeOH–H<sub>2</sub>O followed by MeOH to give the fluorous fraction, the *urea* **33** (R = R<sup>F</sup>) (20 mg, 87%, >90% purity by <sup>1</sup>H NMR spectroscopy) as a colourless oil, *R*<sub>f</sub> 0.31 (8:2 petrol–EtOAc);  $\delta_{\text{H}}$  (500 MHz, CDCl<sub>3</sub>) 7.65–7.61 (1H, m, Ph), 7.60 (2H, d, *J* 8.1, tosyl 2-H and 6-H), 7.27 (2H, d, *J* 8.1, tosyl 3-H and 5-H), 7.26–7.14 (4H, m, Ph), 5.94–5.85 (2H, m, 3-H and 4-H), 5.84–5.80 (1H, m, NH), 5.57 (1H, br. s, 3'-H), 4.54–4.49 (1H, m, 2'-H), 4.37 (1H, dd, *J* 14.6 and 5.6, NCH<sub>A</sub>Ph), 4.32–4.21 (3H, m, 5'-H<sub>A</sub>, 2-H<sub>A</sub> and NCH<sub>B</sub>Ph), 4.12 (1H, d, *J* 6.5, CHOMe), 3.98–3.94 (1H, m, 5-H), 3.91–3.86 (1H, m, 5'-H<sub>B</sub>), 3.79 (1H, d, *J* 15.5, 4'-CCH<sub>A</sub>), 3.72 (1H, d, *J* 15.5, 4'-CCH<sub>B</sub>), 3.67 (1H, dd, *J* 14.3 and 2.8, 6-H<sub>A</sub>), 3.53 (1H, dd, *J* 18.3 and 1.6, 2-H<sub>B</sub>), 3.37–3.26 (6H, m, OMe, 6-H<sub>B</sub> and CF<sub>2</sub>CH<sub>2</sub>CH<sub>2</sub>), 2.37 (3H, s, tosyl Me), 2.36–2.25 (2H, m, CF<sub>2</sub>CH<sub>2</sub>);  $\delta_{\text{C}}$  (75 MHz, CDCl<sub>3</sub>) 158.2 (C=O), 144.2 (tosyl 4-C), 139.8 (phenyl 1-C), 137.4 (4'-C), 135.6 (tosyl 1-C), 130.3 (3-C), 130.0 (tosyl 3-C and 5-C), 128.5 (Ph), 127.9 (Ph), 127.2 (Ph), 127.1 (tosyl 2-C and 6-C), 125.5 (3'-C), 124.8 (4-C), 106.9 (CHOMe), 87.3 (2'-C), 75.1 (5'-C), 72.2 (5-C), 54.7 (OMe), 47.2 (6-C), 45.9 (4'-CCH<sub>2</sub>N), 45.1 (NCH<sub>2</sub>Ph), 43.5 (2-C), 40.3 (CF<sub>2</sub>CH<sub>2</sub>CH<sub>2</sub>), 30.8 (CF<sub>2</sub>CH<sub>2</sub>), 21.6 (tosyl Me);  $\nu_{\text{max}}/\text{cm}^{-1}$  (film) 2948, 2925, 2854, 1634 and 1538.

**(S)-N-Benzyl-5-hydroxy-5,6-dihydropyridine-1(2H)-carboximide 33** (R = H)

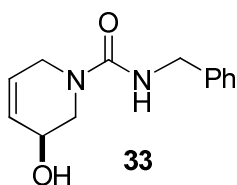

Following general procedure **D**, sulfonamide **33** (R = R<sup>F</sup>) (13 mg, 0.012 mmol) and 3% trifluoroacetic acid gave a crude product after 16 hours. Purification by Fluorous Solid Phase Extraction; 2 g cartridge, loading with <400  $\mu$ L DMF, with 80:20 MeOH–H<sub>2</sub>O, gave the organic fraction. Further purification by flash chromatography, eluting with 99:1 DCM–MeOH, gave the *alcohol* **33** (R = H) (3.4 mg, 82%) as a colourless oil, *R*<sub>f</sub> 0.27 (EtOAc);  $[\alpha]_{\text{D}}^{20} +36.0$  (*c* 1.00 in chloroform);  $\delta_{\text{H}}$  (500 MHz, CDCl<sub>3</sub>) 7.35–7.25 (5H, m, Ph), 5.99–5.94 (1H, m, 4-H), 5.86 (1H, dt, *J* 10.0 and 3.0, 3-H), 4.93 (1H, br. s, NH), 4.48–4.39 (2H, m, NHCH<sub>2</sub>Ph), 4.23–4.19 (1H, m, 5-H), 4.11 (1H, app. d, *J* 17.3, 2-H<sub>A</sub>), 3.71 (1H, app. d, *J* 17.3, 2-H<sub>B</sub>), 3.62 (1H, dd, *J* 13.5 and 3.2, 6-H<sub>A</sub>), 3.47 (1H, dd, *J* 13.5 and 2.6, 6-H<sub>B</sub>);  $\delta_{\text{C}}$  (75 MHz, CDCl<sub>3</sub>) 198.2 (C=O), 128.7 (Ph), 128.1 (phenyl 1-C), 127.83 (4-C), 127.79 (Ph), 127.76 (3-C), 127.4 (phenyl 4-C), 63.7 (5-C), 48.2 (6-C), 45.1 (NHCH<sub>2</sub>Ph) and 43.8 (2-C);  $\nu_{\text{max}}/\text{cm}^{-1}$  (film) 3344 (br), 3061, 3035, 2923, 2852, 1682, 1680, 1646 and 1537; *m/z* (ESI<sup>+</sup>) 255.1 ([M + Na]<sup>+</sup> 100%); found MNa<sup>+</sup> 255.1096, C<sub>13</sub>H<sub>16</sub>N<sub>2</sub>O<sub>2</sub> requires *MNa* 255.1104.

**(S)-5-Hydroxy-5,6-dihydropyridine-1(2H)-acetate 34** (R = H)

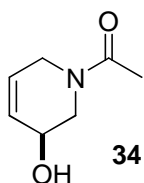

Following general procedure D, thiophenol (14  $\mu$ L, 0.13 mmol), sulfonamide **26** (65 mg, 63.4  $\mu$ mol) and 1,8-diazabicyclo[5.4.0]undec-7-ene (19  $\mu$ L, 0.13 mmol) were stirred for 20 minutes. Pyridine (47  $\mu$ L, 0.76 mmol) and acetic anhydride (48  $\mu$ L, 0.63 mmol) were added and the reaction mixture was stirred for a further 16 hours. The solution was concentrated under nitrogen and purified by Fluorous Solid Phase Extraction; 2 g cartridge loading with <400  $\mu$ L DMF, eluting with 8:2 MeOH–H<sub>2</sub>O followed by MeOH to give the fluorous fraction, the crude sulfonamide **34** (R = R<sup>F</sup>) (53 mg). Without further purification, **34** (R = R<sup>F</sup>) was dissolved in 3% trifluoroacetic acid according to general procedure D and stirred for 16 hours to give a crude product which was purified by Fluorous Solid Phase Extraction; 2 g cartridge, loading with <400  $\mu$ L DMF, with 80:20 MeOH–H<sub>2</sub>O to give the organic fraction. Further purification by flash chromatography, eluting with 30:70 petrol–EtOAc, gave the *alcohol* **34** (R = H) (6 mg, 67% over 2 steps; 70:30 mixture of rotamers) as a colourless oil,  $R_f$  0.17 (EtOAc);  $[\alpha]_D^{20} +82.8$  (c 1.00 in chloroform);  $\delta_H$  (500 MHz, CDCl<sub>3</sub>) 6.01–5.89 (3H, m, 3-H<sup>maj</sup>, 4-H<sup>maj</sup> and 4-H<sup>min</sup>), 5.84–5.80 (1H, m, 3-H<sup>min</sup>), 4.46 (1H, br. d,  $J$  18.9, 2-H<sub>A</sub><sup>maj</sup>), 4.29–4.24 (1H, m, 5-H<sup>min</sup>), 4.22–4.18 (1H, m, 5-H<sup>maj</sup>), 3.99 (1H, br.d,  $J$  17.2, 2-H<sub>A</sub><sup>min</sup>), 3.92–3.87 (1H, m, 2-H<sub>B</sub><sup>min</sup>), 3.77 (1H, dd,  $J$  13.1 and 3.9, 6-H<sub>A</sub><sup>min</sup>), 3.73–3.66 (3H, m, 6-H<sub>B</sub><sup>min</sup>, 2-H<sub>B</sub><sup>maj</sup> and 6-H<sub>A</sub><sup>maj</sup>), 3.48 (1H, dd,  $J$  13.6 and 3.2, 6-H<sub>B</sub><sup>maj</sup>), 2.18 (3H, s, CH<sub>3</sub><sup>maj</sup>), 2.12 (3H, s, CH<sub>3</sub><sup>min</sup>);  $\delta_C$  (75 MHz, CDCl<sub>3</sub>) 170.7 (C=O<sup>maj</sup> and C=O<sup>min</sup>), 130.0 (4-C<sup>min</sup>), 129.0 (4-C<sup>maj</sup>), 127.6 (3-C<sup>maj</sup>), 126.1 (3-C<sup>min</sup>), 64.3 (5-C<sup>maj</sup>), 64.0 (5-C<sup>min</sup>), 51.0 (6-C<sup>maj</sup> and 6-C<sup>min</sup>), 45.8 (2-C<sup>min</sup>), 42.0 (2-C<sup>maj</sup>); 22.1 (CH<sub>3</sub><sup>min</sup>), 21.7 (CH<sub>3</sub><sup>maj</sup>);  $\nu_{max}/cm^{-1}$  (film) 3373 (br.), 2922, 2853, 1710, 1623 and 1446;  $m/z$  (TOF MS EI<sup>+</sup>) 123.1 ([M – H<sub>2</sub>O] 100%); found [M – H<sub>2</sub>O] 123.0679, C<sub>7</sub>H<sub>9</sub>NO requires [M – H<sub>2</sub>O] 123.0684.

**(S)-[5-Hydroxy-5,6-dihydropyridin-1(2H)-yl](isoxazol-5'-yl)methanone 35**

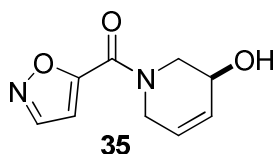

Following general procedure D, thiophenol (12  $\mu$ L, 0.11 mmol), sulfonamide **26** (28 mg, 27.3  $\mu$ mol) and 1,8-diazabicyclo[5.4.0]undec-7-ene (79  $\mu$ L, 0.11 mmol) were stirred for 20 minutes. DMAP (13 mg, 0.13 mmol) and isoxazolyl-5-carbonyl chloride (11  $\mu$ L, 0.11 mmol) were sequentially added and the reaction mixture was stirred for a further 16 hours. The reaction mixture was concentrated under reduced pressure and purified by Fluorous Solid Phase Extraction (2 g cartridge, loading with <400  $\mu$ L DMF), eluting with 80:20 methanol–water, followed by methanol, to give the fluorous fraction. The crude sulfonamide was subsequently dissolved in a solution of 3% trifluoroacetic acid in dichloromethane and stirred for 16 hours. The crude product was concentrated under reduced pressure and purified by Fluorous Solid Phase Extraction (2 g cartridge, loading with <400  $\mu$ L DMF), eluting with 80:20 methanol–water, to give the organic fraction. Further purification by flash chromatography, eluting with 30:70 petrol–EtOAc, gave the *alcohol* **35** (3 mg, 57% over 2 steps; 65:35 mixture of rotamers) as a colourless oil,  $R_f$  0.038 (EtOAc);  $[\alpha]_D^{20} +108.8$  ( $c$  0.25 in chloroform);  $\delta_H$  (500 MHz,  $CDCl_3$ ) 8.33 (2H, d,  $J$  1.8, 3'-H<sup>maj</sup> & min or 4'-H<sup>maj</sup> & min), 6.87-6.83 (2H, m, 3'-H<sup>maj</sup> & min or 4'-H<sup>maj</sup> & min), 6.03-5.94 (3H, m, 3-H<sup>maj</sup>, 4-H<sup>maj</sup> and 3-H<sup>min</sup> or 4-H<sup>min</sup>), 5.86-5.81 (1H, m, 3-H<sup>min</sup> or 4-H<sup>min</sup>), 4.47 (1H, br. d,  $J$  18.2, 2-H<sub>A</sub><sup>maj</sup>), 4.42-4.31 (3H, m, 5-H<sup>maj</sup>, 5-H<sup>min</sup> and 2-H<sub>A</sub><sup>min</sup>), 4.20 (1H, br. d,  $J$  18.2, 2-H<sub>B</sub><sup>min</sup>), 4.03-3.97 (1H, m, 2-H<sub>B</sub><sup>maj</sup>), 3.93-3.87 (3H, m, 6-H<sub>A</sub><sup>maj</sup>, 6-H<sup>min</sup>), 3.75 (1H, dd,  $J$  13.8 and 3.4, 6-H<sub>B</sub><sup>maj</sup>), 2.02 (1H, br.s,  $OH^{min}$ ), 1.88 (1H, br. s,  $OH^{maj}$ );  $\delta_C$  (75 MHz,  $CDCl_3$ ) 163.2 (5'-C<sup>maj</sup> and 5'-C<sup>min</sup>), 158.1 (C=O<sup>maj</sup>), 157.7 (C=O<sup>min</sup>), 150.3 (3'-C<sup>min</sup> or 4'-C<sup>min</sup>), 150.1 (3'-C<sup>maj</sup> or 4'-C<sup>maj</sup>), 129.0 (3-C<sup>min</sup> or 4-C<sup>min</sup>), 127.9 (3-C<sup>maj</sup> or 4-C<sup>maj</sup>), 127.3 (3-C<sup>maj</sup> or 4-C<sup>maj</sup>), 126.1 (3-C<sup>min</sup> or 4-C<sup>min</sup>), 108.3 (3'-C<sup>min</sup> or 4'-C<sup>min</sup>), 107.7 (3'-C<sup>maj</sup> or 4'-C<sup>maj</sup>), 63.7 (5-C<sup>maj</sup>), 63.5 (5-C<sup>min</sup>), 50.4 (6-C<sup>maj</sup>), 46.8 (6-C<sup>min</sup>), 45.8 (2-C<sup>min</sup>) and 42.7 (2-C<sup>maj</sup>);  $\nu_{max}/cm^{-1}$  (film) 3400 (br), 3042, 2962, 2920, 2850, 1633, 1580, 1482 and 1428;  $m/z$  (ESI<sup>+</sup>) 195.1 ([M + H]<sup>+</sup> 100%), 217.1 ([M + Na]<sup>+</sup> 72%); found  $MH^+$  195.0759,  $C_9H_{11}N_2O_3$  requires  $MH$  195.0764.

***N*-(3,3,4,4,5,5,6,6,7,7,8,8,9,9,10,10,10-Heptafluorodecyl)-*N*-[*{(R)-5-[(S)-methoxy(3'aS,8'aR,9'R)-11'-(2-nitrophenylsulfonyl)-5',7'-dioxo-6'-phenyl-3',3'a,5',6',7',8'a,9',10',11',12'-decahydro-1H-furo[3',4'-e]pyrido[4',3'-c][1',2',4']triazolo[1',2'-a]pyridazin-9'-yloxy}methyl*]-2,5-dihydrofuran-3-yl}methyl]-4-methylbenzenesulfonamide **36** (R = R<sup>F</sup>)**

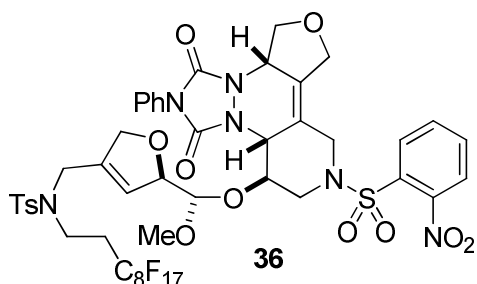

4-Phenyl-[1,2,4]-triazole-3,5-dione (51 mg, 0.29 mmol) was added to a solution of sulfonamide **29** (80 mg, 73.1  $\mu\text{mol}$ ) in dichloromethane (1 mL) and stirred for 20 minutes. The reaction mixture was concentrated under reduced pressure to give a crude product which was purified by Fluorous Solid Phase Extraction; 2 g cartridge, loading with <200  $\mu\text{L}$  DCM, with 80:20 MeOH–H<sub>2</sub>O followed by MeOH to give the fluorous fraction, the *fused tetracycle* **36** (R = R<sup>F</sup>) (80 mg, 86%, 87% purity by HPLC) as a white foam,  $R_f$  0.67 (EtOAc);  $\delta_H$  (500 MHz, CDCl<sub>3</sub>) 8.10 (1H, dd,  $J$  7.5 and 1.8, nosyl 3-H), 7.81-7.68 (3H, m, nosyl 4-H, 5-H and 6-H), 7.64 (2H, d,  $J$  7.9, tosyl 2-H and 6-H), 7.50-7.42 (5H, m, Ph), 7.34 (2H, d,  $J$  7.9, tosyl 3-H and 5-H), 5.69 (1H, s, 4-H), 4.78-4.74 (1H, m, 5-H), 4.64 (1H, app. t,  $J$  7.9, 3'-H), 4.59-4.53 (2H, m, 1'-H<sub>A</sub> and 8'a-H), 4.46 (1H, d,  $J$  13.7, 1'-H<sub>B</sub>), 4.42 (1H, d,  $J$  3.6, CHOMe), 4.40-4.37 (2H, m, 2-H), 4.29 (1H, dd,  $J$  13.8 and 1.7, 12'-H<sub>A</sub>), 4.24-4.18 (1H, m, 3'a-H<sub>A</sub>), 4.04 (1H, dd,  $J$  13.0 and 4.6, 10'-H<sub>A</sub>), 3.85 (1H, app. td,  $J$  10.3 and 4.6, 9'-H), 3.78-3.72 (2H, m, 3'-H<sub>B</sub> and 3-CCH<sub>A</sub>), 3.48 (3H, s, OMe), 3.43 (1H, d,  $J$  13.8, 12'-H<sub>B</sub>), 3.38-3.20 (3H, m, 3-CCH<sub>B</sub> and CF<sub>2</sub>CH<sub>2</sub>CH<sub>2</sub>), 3.01 (1H, dd,  $J$  13.0 and 10.3, 10'-H<sub>B</sub>), 2.46 (3H, s, tosyl Me), 2.42-2.17 (2H, m, CF<sub>2</sub>CH<sub>2</sub>);  $\delta_C$  (75 MHz, CDCl<sub>3</sub>) 156.7 (5'-C or 7'-C), 151.0 (5'-C or 7'-C), 148.4 (nosyl 2-C), 144.5 (tosyl 4-C), 137.8 (3-C), 136.2 (tosyl 1-C), 135.4 (12'b-C), 134.8 (nosyl 4-C), 132.5 (nosyl 6-C), 131.9 (nosyl 1-C), 131.6 (nosyl 3-C), 131.3 (phenyl 1-C), 130.3 (tosyl 3-C and 5-C), 129.4 (phenyl 2-C and 6-C or phenyl 3-C and 5-C), 128.6 (phenyl 4-C), 127.5 (tosyl 2-C and 6-C), 126.1 (phenyl 2-C and 6-C or phenyl 3-C and 5-C), 126.0 (4-C), 125.0 (nosyl 5-C), 120.1 (12'a-C), 105.4 (CHOMe), 87.6 (5-C), 76.2 (2-C), 75.4 (9'-C), 71.0 (3'-C), 66.9 (1'-C), 59.5 (OMe), 59.3 (3'a-C), 57.5 (8'a-C), 48.6 (10'-C), 47.1 (12'-C), 45.8 (3-CCH<sub>2</sub>), 40.3 (CF<sub>2</sub>CH<sub>2</sub>CH<sub>2</sub>), 31.1 (CF<sub>2</sub>CH<sub>2</sub>), 21.9 (tosyl Me);  $\nu_{\text{max}}$  /cm<sup>-1</sup> (film) 3071, 2926, 2866, 2254, 1780, 1723, 1599, 1544, 1503 and 1426;  $m/z$  (ESI<sup>+</sup>) 1291.2 ([M + Na]<sup>+</sup> 100%); found MNa<sup>+</sup> 1291.1834, C<sub>47</sub>H<sub>41</sub>F<sub>17</sub>N<sub>6</sub>O<sub>12</sub>S<sub>2</sub> requires MNa 1291.1845.

**(3a*S*,8a*R*,9*R*)-9-Hydroxy-11-(2-nitrophenylsulfonyl)-6-phenyl-3,3a,9,10,11,12-hexahydro-1*H*-furo[3,4-*e*]pyrido[4,3-*c*][1,2,4]triazolo[1,2-*a*]pyridazine-5,7(6*H*,8a*H*)-dione **36** (R = H)**

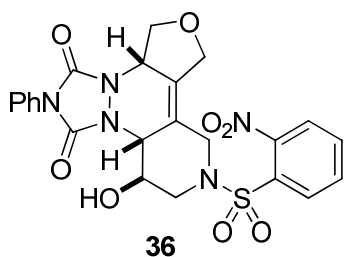

Following general procedure D, sulfonamide **35** ( $R = R'^F$ ) (55 mg, 43.4  $\mu\text{mol}$ ) gave the crude product after 16 hours, which was purified by Fluorous Solid Phase Extraction; 2 g cartridge, loading with <200  $\mu\text{L}$  dichloromethane, eluting with 80:20 MeOH–H<sub>2</sub>O, to give the organic fraction (15 mg, 65%, 83% purity by HPLC). Further purification by flash chromatography, eluting with 99:1 DCM–MeOH, gave the *sulfonamide* **36** ( $R = \text{H}$ ) (13 mg, 59%) as a colourless foam,  $R_f$  0.57 (EtOAc),  $[\alpha]_D^{20} +130.2$  ( $c$  1.00 in chloroform);  $\delta_{\text{H}}$  (500 MHz, CDCl<sub>3</sub>) 8.09 (1H, dd,  $J$  7.5 and 1.7, nosyl 3-H), 7.79-7.68 (3H, m, nosyl 4-H, 5-H and 6-H), 7.54-7.34 (5H, m, Ph), 4.77-4.64 (3H, m, 1-H<sub>A</sub>, 3-H<sub>A</sub> and 8a-H), 4.55 (1H, d,  $J$  13.8, 1-H<sub>B</sub>), 4.39 (1H, dd,  $J$  14.3 and 2.0, 12-H<sub>A</sub>), 4.26-4.19 (1H, m, 3a-H), 4.08-4.01 (1H, m, 9-H), 3.93 (1H, ddd,  $J$  13.3, 5.1 and 2.0, 10-H<sub>A</sub>), 3.76 (1H, dd,  $J$  9.8 and 8.8, 3-H<sub>B</sub>), 3.49 (1H, br. d,  $J$  14.3, 12-H<sub>B</sub>), 3.01-2.91 (2H, m, 10-H<sub>B</sub> and OH);  $\delta_{\text{C}}$  (75 MHz, CDCl<sub>3</sub>) 155.1 (2  $\times$  C=O), 148.4 (nosyl 2-C), 134.73 (12b-C), 134.65 (nosyl 4-C), 132.5 (nosyl 6-C), 132.2 (nosyl 1-C), 131.7 (nosyl 3-C), 130.9 (phenyl 1-C), 129.7 (phenyl 2-C and 6-C or phenyl 3-C and 5-C), 129.1 (phenyl 4-C), 125.8 (phenyl 2-C and 6-C or phenyl 3-C and 5-C), 124.9 (nosyl 5-C), 118.5 (12a-C), 72.8 (9-C), 71.3 (3-C), 67.3 (1-C), 59.8 (8a-C), 57.8 (3a-C), 50.4 (10-C), 46.9 (12-C);  $\nu_{\text{max}}$  /cm<sup>-1</sup> 3418 (br), 3095, 3003, 2924, 2869, 1760, 1713, 1599, 1544, 1503 and 1428;  $m/z$  (ESI<sup>+</sup>) 550.1 ([M + Na]<sup>+</sup> 100%); found MNa<sup>+</sup> 550.0998, C<sub>23</sub>H<sub>21</sub>N<sub>5</sub>O<sub>8</sub>S requires MNa 550.1003.

**(3a*S*,8a*R*,9*R*)-*N*-Benzyl-9-[(*S*)-{(*R*)-4'-[*N*-(3,3,4,4,5,5,6,6,7,7,8,8,9,9,10,10,10-heptafluorodecyl)-4-methylsulfonamido]methyl]-2',5'-dihydrofuran-2'-yl](methoxy)methoxy]-5,7-dioxo-6-phenyl-3,3a,6,7,8a,9,10,12-octahydro-1*H*-furo[3,4-*e*]pyrido[4,3-*c*][1,2,4]triazolo[1,2-*a*]pyridazine-11(5*H*)-carboxamide **37** ( $R = R'^F$ )**

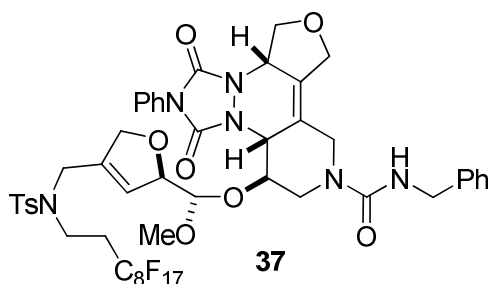

Thiophenol (6  $\mu\text{L}$ , 50.4  $\mu\text{mol}$ ) was added dropwise to a solution of sulfonamide **35** ( $R = R'^F$ ) (32 mg, 25  $\mu\text{mol}$ ) and 1,8-diazabicyclo[5.4.0]undec-7-ene (8  $\mu\text{L}$ , 50.4  $\mu\text{mol}$ ) in acetonitrile (1.0 mL)

and stirred at room temperature for 1 hour. Benzyl isocyanate (17 mg, 0.13 mmol) was added and the reaction mixture was stirred for a further 16 hours. Purification by Fluorous Solid Phase Extraction; 2 g cartridge, loading with <200  $\mu$ L dichloromethane, eluting with 80:20 MeOH–H<sub>2</sub>O followed by MeOH, gave the fluorous fraction, the *carboximide* **37** (R = R<sup>F</sup>) (24 mg, 79%, >95% purity by <sup>1</sup>H NMR spectroscopy) as a colourless foam, *R*<sub>f</sub> 0.64 (EtOAc);  $\delta$ <sub>H</sub> (500 MHz, CDCl<sub>3</sub>) 7.63 (2H, d, *J* 8.2, tosyl 2-C and 6-C), 7.49-7.42 (4H, m, Ph), 7.37-7.27 (8H, m, Ar), 5.68 (1H, s, 3'-H), 5.15 (1H, t, *J* 5.4, NH), 4.76-4.72 (1H, m, 2'-H), 4.71 (1H, d, *J* 14.1, 1-H<sub>A</sub>), 4.66-4.61 (2H, m, 3-H<sub>A</sub> and 8a-H), 4.55 (1H, d, *J* 14.2, 12-H<sub>A</sub>), 4.53-4.47 (1H, m, 1-H<sub>B</sub>), 4.47 (1H, dd, *J* 14.7 and 5.4, NCH<sub>A</sub>Ph), 4.39 (1H, dd, *J* 14.7 and 5.4, NCH<sub>B</sub>Ph), 4.36-4.31 (1H, m, 5'-H<sub>A</sub>), 4.31 (1H, d, *J* 4.2, CHOMe), 4.29-4.24 (1H, m, 5'-H<sub>B</sub>), 4.23-4.17 (1H, m, 3a-H), 3.87 (1H, dd, *J* 14.4 and 4.3, 10-H<sub>A</sub>), 3.76 (1H, d, *J* 15.5, 4'-CCH<sub>A</sub>), 3.74-3.65 (2H, m, 9-H and 3-H<sub>B</sub>), 3.49 (1H, d, *J* 14.2, 12-H<sub>B</sub>), 3.41 (1H, d, *J* 15.5, 4'-CCH<sub>B</sub>), 3.37 (3H, s, OMe), 3.33-3.20 (2H, m, CF<sub>2</sub>CH<sub>2</sub>CH<sub>2</sub>), 3.18 (1H, dd, *J* 14.4 and 5.3, 10-H<sub>B</sub>), 2.45 (3H, s, tosyl Me), 2.40-2.18 (2H, m, CF<sub>2</sub>CH<sub>2</sub>);  $\delta$ <sub>C</sub> (75 MHz, CDCl<sub>3</sub>) 157.5 (5-C or 7-C), 156.9 (5-C or 7-C), 150.7 (11-NC=O), 144.5 (tosyl 4-C), 139.4 (NCH<sub>2</sub>-phenyl 1-C), 137.8 (4'-C), 136.2 (tosyl 1-C), 133.4 (12b-C), 131.9 (6-N-phenyl 1-C), 130.3 (tosyl 3-C and 5-C), 129.4 (phenyl 2-C and 6-C or phenyl 3-C and 5-C), 129.1 (phenyl 2-C and 6-C or phenyl 3-C and 5-C), 128.6 (phenyl 4-C), 128.2 (phenyl 2-C and 6-C or phenyl 3-C and 5-C), 128.0 (phenyl 4-C), 127.5 (tosyl 2-C and 6-C), 125.93 (phenyl 2-C and 6-C or phenyl 3-C and 5-C), 125.87 (3'-C), 121.8 (12a-C), 105.5 (CHOMe), 87.8 (2'-C), 76.3 (9-C), 76.1 (5'-C), 71.1 (3-C), 67.4 (1-C), 59.2 (3a-C), 58.5 (OMe), 57.5 (8a-C), 48.4 (10-C), 45.93 (NCH<sub>2</sub>Ph or 12-C), 45.91 (NCH<sub>2</sub>Ph or 12-C), 45.7 (4'-CCH<sub>2</sub>), 40.5 (CF<sub>2</sub>CH<sub>2</sub>CH<sub>2</sub>), 31.1 (CF<sub>2</sub>CH<sub>2</sub>) and 21.9 (tosyl Me);  $\nu$ <sub>max</sub> /cm<sup>-1</sup> 2958, 2923, 2853, 1779, 1722, 1639, 1599, 1532, 1503, 1455 and 1423; *m/z* (ESI<sup>+</sup>) 1239.3 ([M + Na]<sup>+</sup> 100%); found MNa<sup>+</sup> 1239.2535, C<sub>49</sub>H<sub>45</sub>F<sub>17</sub>N<sub>6</sub>O<sub>9</sub>S requires *MNa* 1239.2589.

**(3a*S*,8a*R*,9*R*)-*N*-Benzyl-9-hydroxy-5,7-dioxo-6-phenyl-3,3a,6,7,8a,9,10,12-octahydro-1*H*-furo[3,4-*e*]pyrido[4,3-*c*][1,2,4]triazolo[1,2-*a*]pyridazine-11(5*H*)-carboxamide **37** (R = H)**

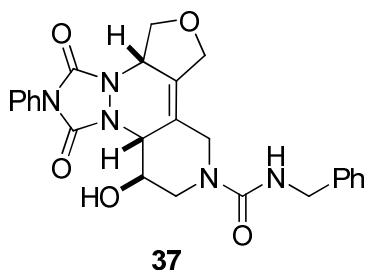

Following general procedure D, sulfonamide **36** (R = R<sup>F</sup>) (55 mg, 43.4  $\mu$ mol) gave the crude product after 16 hours. Purification by Fluorous Solid Phase Extraction; 2 g cartridge, loading with <200  $\mu$ L dichloromethane, eluting with 80:20 MeOH–H<sub>2</sub>O, gave the organic fraction (8 mg, 90%, 86% purity by HPLC). Further purification by flash chromatography, eluting with 99:1 DCM–



MeOH, gave the *sulfonamide* **37** (R = H) (6 mg, 67%) as a colourless foam,  $R_f$  0.41 (95:5 DCM–MeOH),  $[\alpha]_D^{20}$  –85.2 ( $c$  1.00 in chloroform);  $\delta_H$  (500 MHz,  $CDCl_3$ ) 7.53–7.39 (5H, m, Ph), 7.37–7.26 (5H, m, Ph), 5.08 (1H, t,  $J$  5.7, NH), 4.77–4.65 (4H, m, 1- $H_A$ , 3- $H_A$ , 8a-H and OH), 4.59 (1H, d,  $J$  15.5, 12- $H_A$ ), 4.55 (1H, d,  $J$  13.9, 1- $H_B$ ), 4.44 (1H, dd,  $J$  14.5 and 5.7,  $NCH_A$ Ph), 4.39 (1H, dd,  $J$  14.5 and 5.7,  $NCH_B$ Ph), 4.25–4.19 (1H, m, 3a-H), 3.99–3.93 (1H, m, 9-H), 3.71–3.61 (3H, m, 10- $H_A$ , 12- $H_B$  and 3- $H_B$ ), 3.25 (1H, dd,  $J$  14.5 and 8.0, 10- $H_B$ );  $\delta_C$  (75 MHz,  $CDCl_3$ ) 157.1 (11-NC=O), 154.4 (5-C or 7-C), 152.7 (5-C or 7-C), 138.8 (phenyl 1-C), 132.5 (12a-C or 12b-C), 130.5 (phenyl 1-C), 129.3 (phenyl 2-C and 6-C or phenyl 3-C and 5-C), 128.7 (phenyl 2-C and 6-C or phenyl 3-C and 5-C), 127.8, 127.7, (phenyl 4-C and phenyl 2-C and 6-C or phenyl 3-C and 5-C), 127.5 (phenyl 4-C), 125.3 (phenyl 2-C and 6-C or phenyl 3-C and 5-C), 119.5 (12a-C or 12b-C), 73.8 (9-C), 71.3 (3-C), 67.7 (1-C), 60.3 (3a-C), 57.3 (8a-C), 50.4 (10-C), 45.58 (12-C or  $NCH_2$ Ph) and 45.55 (12-C or  $NCH_2$ Ph);  $\nu_{max}/cm^{-1}$  3383 (br), 3065, 3031, 2926, 2869, 1776, 1714, 1666, 1630, 1539, 1504 and 1427;  $m/z$  (ESI<sup>+</sup>) 498.2 ( $[M + Na]^+$  100%); found  $MNa^+$  498.1764,  $C_{25}H_{25}N_5O_5S$  requires  $MNa$  498.1748.

## Validation and synthesis of the fluoros-tagged linkers

### 3-[Methoxy-(4'-methyl-2',5'-dihydro-furan-2'-yl)-methoxy]-3,6-dihydro-2H-pyran 10

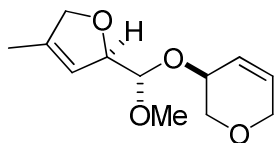

**10**

**G2** (10 mg, 6  $\mu\text{mol}$ , 0.03 eq.) was added to a stirred solution of the triene **8** (50 mg, 0.197 mmol) in dichloromethane (25 mL) at 45 °C and stirred for 1.5 h before additional catalyst (10 mg, 6  $\mu\text{mol}$ , 0.03 eq.) was added and stirred for a further 2.5 h at 45 °C. The solvent was removed under reduced pressure and residue purified using flash chromatography, eluting with 90:10 petrol–EtOAc containing 1% triethylamine, to give the *bicycle* **10** (41 mg, 92%) as a colourless oil,  $R_f$  0.20 (80:20 petrol–EtOAc);  $[\alpha]_D +150.4$  ( $c$  1.00 in methanol); 1190, 1138 and 1082;  $\delta_H$  (500 MHz,  $\text{CDCl}_3$ ) 5.97 (1H, ddd,  $J$  10.4, 9.3 and 2.5, 5-H), 5.92 (1H, br d,  $J$  10.4, 4-H), 5.45 (1H, br s, 3'-H), 4.76-4.74 (1H, m, 2'-H), 4.52 (1H, dd,  $J$  12.3 and 9.3, 6-H<sub>a</sub>), 4.46 (1H, br d,  $J$  12.4, 6-H<sub>b</sub>), 4.34 (1H, d,  $J$  5.8, MeOCH), 4.18 (1H, br s, 3-H), 4.15 (1H, d,  $J$  16.8, 5'-H<sub>a</sub>), 4.05 (1H, d,  $J$  16.8, 5'-H<sub>b</sub>), 3.88 (1H, dd,  $J$  11.4 and 4.1, 2-H<sub>a</sub>), 3.75 (1H, dd,  $J$  11.4 and 5.2, 2-H<sub>b</sub>), 3.44 (3H, s, OMe) and 1.77 (3H, s, Me);  $\delta_C$  (125 MHz,  $\text{CDCl}_3$ ) 138.5 (4'-C), 129.6 (4-C), 125.8 (5-C), 119.9 (3'-C), 105.3 (MeOC), 87.3 (2'-C), 78.3 (6-C), 68.4 (2-C), 67.8 (3-C), 65.2 (5'-C), 55.5 (OMe) and 12.4 (4'-CCH<sub>3</sub>);  $\nu_{\text{max}}/\text{cm}^{-1}$  3039, 2838 and 1447;  $m/z$  (ES<sup>+</sup>) 244 (100%,  $\text{MNH}_4^+$ ). (Found:  $\text{MNa}^+$  249.1098,  $\text{C}_{12}\text{H}_{18}\text{O}_4\text{Na}$  requires  $\text{MNa}$ , 249.1103).

### 3-[(2',5'-Dihydrofuran-2'-yl)-methoxymethoxy]-5-methyl-3,6-dihydro-2H-pyran 11

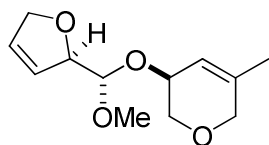

**11**

**G2** (10 mg, 6  $\mu\text{mol}$ , 0.03 eq.) was added to a stirred solution of the triene **9** (50 mg, 0.197 mmol) in dichloromethane (25 mL) at 45 °C and stirred for 1.5 h before additional catalyst (10 mg, 6  $\mu\text{mol}$ , 0.03 eq.) was added and stirred for a further 2.5 h at 45 °C. The solvent was removed under reduced pressure and residue purified using flash chromatography, eluting with 90:10 petrol–EtOAc containing 1% triethylamine, to give the *bicycle* **11** (39 mg, 88%) as a colourless oil,  $R_f$  0.25 (70:30 petrol–EtOAc);  $[\alpha]_D +165.6$  ( $c$  1.00 in chloroform);  $\delta_H$  (500 MHz,  $\text{CDCl}_3$ ) 5.93 (1H, dd,  $J$  6.2 and 1.6, 3'-H), 5.78 (1H, ddd,  $J$  6.2, 4.0 and 1.7, 4'-H), 5.63 (1H, d,  $J$  1.6, 4-H), 4.73 (1H,

dd,  $J$  5.6 and 1.6, 2'-H), 4.60 (1H, dd,  $J$  14.8 and 9.2, 5'-H<sub>a</sub>), 4.57 (1H, dd,  $J$  14.8 and 4.6, 5'-H<sub>b</sub>), 4.30 (1H, d,  $J$  5.6, MeOCH), 4.05-4.04 (1H, m, 3-H), 3.95 (1H, br d,  $J$  16.1, 2-H<sub>a</sub>), 3.84 (1H, br d,  $J$  16.1, 2-H<sub>b</sub>), 3.71 (1H, d,  $J$  14.2, 6-H<sub>a</sub>), 3.70 (1H, d,  $J$  14.2, 6-H<sub>b</sub>), 3.38 (3H, s, OMe) and 1.59 (3H, s, Me);  $\delta_C$  (125 MHz, CDCl<sub>3</sub>) 136.7 (5-C), 128.6 (3'-C), 126.1 (4'-C), 120.0 (4-C), 104.9 (MeOC), 86.9 (2'-C), 75.7 (5'-C), 68.5 (2-C), 68.4 (3-C), 68.2 (6-C), 55.7 (OMe) and 18.6 (5-CCH<sub>3</sub>);  $\nu_{\max}/\text{cm}^{-1}$  2955, 2855, 1446 and 1350  $m/z$  (ES<sup>+</sup>) 249 (100%, MNa<sup>+</sup>). (Found: MNH<sub>4</sub><sup>+</sup> 244.1543, C<sub>12</sub>H<sub>18</sub>O<sub>4</sub> requires MNH<sub>4</sub>, 244.1541).

### Methyl 2-(ethyl 2'-(*O*-methyl)-acrylate)-3,4-deoxy-6-*O*-triphenylmethyl- $\alpha$ -D-glucopyranoside **S14**

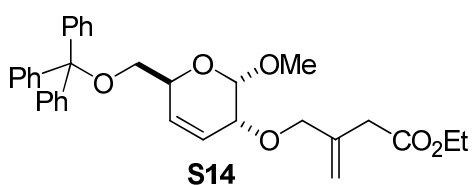

Sodium hydride (425 mg, of a 60% dispersion in mineral oil, 10.62 mmol, 1.5 eq.) was added to a stirred solution of the alcohol **12** (2.85 g, 7.08 mmol) in *N,N*-dimethyl formamide (100 mL) at 0 °C. Once effervescence had ceased, ethyl  $\alpha$ -(bromomethyl)-acrylate (1.95 mL, 14.16 mmol, 2.0 eq.) was added dropwise, the reaction mixture was allowed to warm at room temperature and stirred for 13 h. The reaction mixture was cooled to 0 °C, quenched with saturated aqueous ammonium chloride solution (50 mL), diluted with ether (500 mL), washed with brine (2  $\times$  100 mL), dried (MgSO<sub>4</sub>), solvent removed under reduced pressure and the crude product was purified by flash chromatography (gradient elution: 10:0  $\rightarrow$  39:1  $\rightarrow$  19:1 petrol–EtOAc) to give the *acrylate* **S14** (3.29 g, 90%) as a colourless oil,  $R_f$  0.15 (9:1 petrol–EtOAc);  $[\alpha]_D -22.0$  ( $c$  2.00 in chloroform);  $\delta_H$  (500 MHz, CDCl<sub>3</sub>) 7.45 (6H, d,  $J$  7.8, Ph), 7.27 (6H, app t,  $J$  7.8 and 7.5, Ph), 7.20 (3H, d,  $J$  7.5, Ph), 6.31 (1H, d,  $J$  1.0, 3'-H<sub>a</sub>), 5.94 (1H, d,  $J$  1.0, 3'-H<sub>b</sub>), 5.83 (1H, app d,  $J$  10.6, 3-H), 5.78 (1H, app d,  $J$  10.6, 4-H), 5.00 (1H, d,  $J$  3.9, 1-H), 4.32 (2H, br s, 1'-H), 4.26-4.25 (1H, m, 5-H), 4.19 (2H, q,  $J$  7.1, Et), 4.16-4.15 (1H, m, 2-H), 3.50 (3H, s, OMe), 3.24 (1H, dd,  $J$  9.4 and 5.9, 6-H<sub>a</sub>), 3.16 (1H, dd,  $J$  9.4 and 5.4, 6-H<sub>b</sub>) and 1.27 (3H, t,  $J$  7.2, Et);  $\delta_C$  (125 MHz, CDCl<sub>3</sub>) 166.2 (CO), 144.5 (Ph), 137.8 (2'-C) 129.2 (Ph), 128.9 (4-C), 128.3 (Ph), 127.5 (Ph), 126.3 (3'-C), 124.9 (3-C), 97.4 (1-C), 87.1 (Ph<sub>3</sub>C), 72.7 (1'-C), 68.6 (5-C), 67.6 (2-C), 66.4 (6-C), 61.1 (Et), 56.3 (OMe) and 14.7 (Et);  $\nu_{\max}/\text{cm}^{-1}$  3086, 3058, 3020, 2984, 2929, 2869, 1724, 1715, 1639 and 1597;  $m/z$  (ES<sup>+</sup>) 243.2 (100%, Ph<sub>3</sub>C<sup>+</sup>) and 537.4 (50%, MNa<sup>+</sup>). (Found: MNa<sup>+</sup> 537.2259, C<sub>32</sub>H<sub>34</sub>O<sub>6</sub> requires MNa, 537.2253).

**Methyl 2-*O*-(2'-oxymethyl)-allyl-3,4-deoxy-6-*O*-triphenylmethyl- $\alpha$ -D-gluco-hex-3-enopyranoside **13****

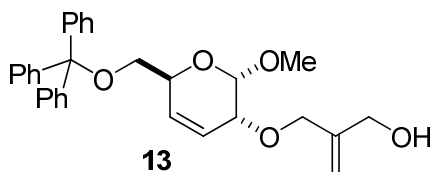

Diisobutylaluminium hydride (0.67 mL, 1.00 mmol, 1.5 M solution in toluene) was added dropwise to a stirred solution of the acrylate **S14** (130 mg, 0.25 mmol) in tetrahydrofuran (10 mL) at  $-78\text{ }^{\circ}\text{C}$ . The solution was stirred at this temperature for 1.5 hours, after which time the reaction mixture was quenched with 1 M aqueous sodium hydroxide solution (2 mL), allowed to warm to room temperature and filtered through celite, washing with EtOAc (20 mL). The filtrate was diluted with brine (100 mL), extracted with EtOAc ( $5 \times 10\text{ mL}$ ), dried ( $\text{MgSO}_4$ ) and the solvent removed under reduced pressure to give a crude product which was purified by flash chromatography, eluting with 90:10 $\rightarrow$ 80:20 petrol–EtOAc, to give the *alcohol* **13** (103 mg, 86%) as a colourless foam,  $R_f$  0.40 (1:1 petrol–EtOAc);  $[\alpha]_D -24.0$  ( $c$  1.00 in chloroform);  $\delta_H$  (500 MHz,  $\text{CDCl}_3$ ) 7.46 (6H, d,  $J$  7.6, Ph), 7.29 (6H, dd,  $J$  7.6 and 7.3, Ph), 7.22 (3H, d,  $J$  7.6, Ph), 5.84 (1H, d,  $J$  10.6, 3-H), 5.74 (1H, dd,  $J$  10.6 and 0.9, 4-H), 5.14 (1H, app s, 3'-H<sub>a</sub>), 5.11 (1H, app s, 3'-H<sub>b</sub>), 5.00 (1H, d,  $J$  3.8, 1-H), 4.23–4.25 (1H, m, 5-H), 4.23 (1H, d,  $J$  13.3, 1'-H<sub>a</sub>), 4.18 (2H, s, 2'-CCH<sub>2</sub>), 4.15 (1H, d,  $J$  13.3, 1'-H<sub>b</sub>), 4.10–4.08 (1H, m, 2-H), 3.50 (3H, s, OMe), 3.23 (1H, dd,  $J$  9.4 and 5.9, 6-H<sub>a</sub>), 3.15 (1H, dd,  $J$  9.4 and 5.3, 6-H<sub>b</sub>) and 1.43 (1H, br s, OH);  $\delta_c$  (125 MHz,  $\text{CDCl}_3$ ) 145.7 (2'-C), 144.4 (Ph), 129.1 (Ph), 128.9 (4-C), 128.3 (Ph), 127.5 (Ph), 124.9 (3-C), 113.9 (3'-C), 97.1 (1-C), 87.1 (Ph<sub>3</sub>C), 71.8 (5-C), 71.2 (1'-C), 68.6 (2-C), 66.3 (6-C), 64.9 (2'-CCH<sub>2</sub>) and 56.2 (OMe);  $\nu_{\max}/\text{cm}^{-1}$  3466, 3086, 3058, 3033, 2925, 2870, 1656, 1597, 1491, 1448, 1397;  $m/z$  (ES<sup>+</sup>) 242.9 (100%,  $\text{Ph}_3\text{C}^+$ ) and 490.1 (25%,  $\text{MNH}_4^+$ ). (Found:  $\text{MNa}^+$  495.2167,  $\text{C}_{30}\text{H}_{32}\text{O}_5\text{Na}$  requires  $\text{MNa}$ , 495.2147).

**(2''*S*,3''*R*,6''*S*)-*N*-(3,3,4,4,5,5,6,6,7,7,8,8,9,9,10,10,10-Heptafluoro-decyl)-*N*-[2'-(2''-methoxy-6''-trityloxymethyl-3'',6''-dihydro-2''*H*-pyran-3''-yloxymethyl)-allyl]-4'''-methylbenzenesulfonamide **15****

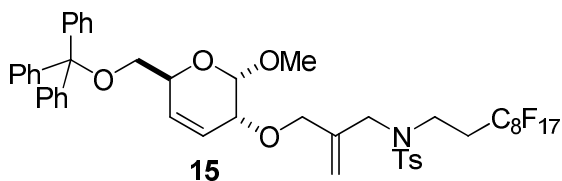

By general procedure **B**, the alcohol **13** (335 mg, 0.71 mmol), triphenylphosphine (2 eq.), DEAD (2 eq.) and the sulfonamide **14** (2 eq.) gave a crude product after 3 h. The crude product was purified by flash chromatography, eluting with 90:10 $\rightarrow$ 85:15 $\rightarrow$ 80:20 petrol–EtOAc), to give the *tertiary*

*sulfonamide 15* (528 mg, 70%) as a colourless foam,  $R_f$  0.15 (9:1 petrol–EtOAc);  $\delta_H$  (500 MHz,  $CDCl_3$ ) 7.76 (2H, d,  $J$  8.2, 2'''-H), 7.52 (6H, d,  $J$  7.5, *ortho* trityl), 7.39–7.34 (8H, m, *meta* trityl and 3'''-H), 7.30 (3H, t,  $J$  7.3, *para* trityl), 5.90 (1H, br d,  $J$  4''-H), 5.79 (1H, br d,  $J$  5''-H), 5.37 (1H, s, 3'-H<sub>a</sub>), 5.19 (1H, s, 3'-H<sub>b</sub>), 5.03 (1H, d,  $J$  3.4, 2''-H), 4.30 (1H, br s, 6''-H), 4.12 (1H, br s, 3''-H), 4.09 (2H, s, 2'-CCH<sub>2</sub>O), 3.91 (1H, d,  $J$  15.0, 1'-H<sub>a</sub>), 3.84 (1H, d,  $J$  15.0, 1'-H<sub>b</sub>), 3.56 (3H, s, OMe), 3.48–3.43 (2H, m, 1-H), 3.30 (dd,  $J$  9.3 and 6.0, 6''-CCH<sub>a</sub>), 3.21 (1H, dd,  $J$  9.3 and 5.4, 6''-CCH<sub>b</sub>) and 2.48–2.38 (5H, m, 2-H and 4'''-CCH<sub>3</sub>);  $\delta_C$  (150 MHz,  $CDCl_3$ ) 144.0 (*ipso* trityl), 143.9 (4'''-C), 140.6 (2'-C), 135.8 (1'''-C), 129.9 (3'''-C), 128.7 (*ortho* trityl), 128.5 (4''-C), 127.8 (*meta* trityl), 127.2 (2'''-C), 127.0 (*para* trityl), 124.2 (5''-C), 116.9 (3'-C), 96.8 (2''-C), 86.6 (OC(Ph)<sub>3</sub>), 71.9 (3''-C), 69.3 (2'-CCH<sub>2</sub>O), 68.2 (6''-C), 65.9 (6''-CCH<sub>2</sub>O), 55.7 (OMe), 51.6 (1'-C), 40.4 (1-C), 21.5 (t,  $^2J_{C-F}$  21.7, 2-C) and 21.5 (4'''-CCH<sub>3</sub>);  $\nu_{max}/cm^{-1}$  3087, 3054, 3027, 2927, 2868, 1657, 1598, 1489, 1448 and 1399 (Found:  $MNa^+$  1094.2360, C<sub>47</sub>H<sub>42</sub>F<sub>17</sub>NO<sub>6</sub>S requires  $MNa$  1094.2354).

**(2''S,3''R,6''S)-N-(3,3,4,4,5,5,6,6,7,7,8,8,9,9,10,10,10-Heptafluoro-decyl)-N-[2'-(2'-methoxy-6''-oxymethyl-3'',6''-dihydro-2''H-pyran-3''-yloxymethyl)-allyl]-4'''-methylbenzenesulfonamide 1**

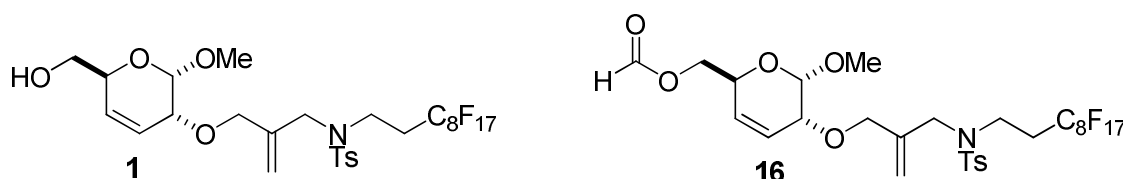

The protected alcohol **15** (525 mg, 0.49 mmol) and triethylsilane (114  $\mu$ L, 0.98 mmol, 2 eq.) were dissolved in a 10:10:1 mixture of formic acid–THF–water and the reaction mixture was stirred at room temperature for 2 h. The reaction mixture was diluted with toluene (100 mL) and concentrated under reduced pressure to give a crude product which was purified by flash chromatography, eluting with 80:20→60:40→50:50 petrol–EtOAc, to give *alcohol 1* (105 mg, 26%) as colourless needles, m.p. 85.9–88.4 °C (from EtOAc);  $R_f$  0.28 (1:1 petrol–EtOAc);  $[\alpha]_D +0.8$  ( $c$  1.00 in chloroform);  $\delta_H$  (500 MHz,  $CDCl_3$ ) 7.72 (2H, d,  $J$  8.3, 2'''-H), 7.76 (2H, d,  $J$  8.3, 3'''-H), 5.83 (1H, dd,  $J$  10.6 and 1.9, 5''-H), 5.76 (1H, dd,  $J$  10.6 and 1.8, 4''-H), 5.34 (1H, s, 3'-H<sub>a</sub>), 5.17 (1H, s, 3'-H<sub>b</sub>), 5.04 (1H, d,  $J$  3.9, 2''-H), 4.29–4.26 (1H, m, 6''-H), 4.13–4.11 (1H, m, 3''-H), 4.08 (2H, s, 2'-CCH<sub>2</sub>O), 3.84 (1H, d,  $J$  15.1, 1'-H<sub>a</sub>), 3.81 (1H, d,  $J$  15.1, 1'-H<sub>b</sub>), 3.76 (1H, dd,  $J$  11.4 and 1.8, 6''-CCH<sub>a</sub>), 3.64 (1H, dd,  $J$  11.4 and 6.1, 6''-CCH<sub>b</sub>), 3.54 (3H, s, OMe), 3.42–3.39 (2H, m, 1-H), 2.47 (3H, s, 4'''-CCH<sub>3</sub>), 2.43–2.36 (2H, m, 2-H) and 1.92 (1H, br s, OH);  $\delta_C$  (75 MHz,  $CDCl_3$ ) 144.4 (4'''-C), 140.9 (2'-C), 136.0 (1'''-C), 130.4 (3'''-C), 127.6 (2'''-C), 127.3 (4''-C), 126.1 (3''-C), 117.5 (3'-C), 97.3 (2''-C), 72.3 (3''-C), 69.8 (5''-C), 69.7 (2'-CCH<sub>2</sub>O), 65.3 (6''-CCH<sub>2</sub>O), 56.2

(OMe), 52.1 (1'-C), 40.9 (1-C), 31.1 (t,  $^1J_{C-F}$  21.4, 2-C) and 21.9 (4'''-CCH<sub>3</sub>);  $\nu_{\max}/\text{cm}^{-1}$  3522, 3016, 2961, 2928, 2901, 2863 and 1464;  $m/z$  (ES<sup>+</sup>) 852 (100%, MNa<sup>+</sup>). (Found: MNa<sup>+</sup> 852.1289, C<sub>28</sub>H<sub>28</sub>F<sub>17</sub>NO<sub>6</sub>S requires MNa, 852.1258).

Also obtained was (2''S,3''R,6''S)-N-(3,3,4,4,5,5,6,6,7,7,8,8,9,9,10,10,10-Heptafluoro-decyl)-N-[2'-(2''-methoxy-6''-formoxymethyl-3'',6''-dihydro-2''H-pyran-3''-yloxymethyl)-allyl]-4'''-methylbenzenesulfonamide **16** (231 mg, 55%) as colourless needles, m.p. 77.6-78.2 °C (from CHCl<sub>3</sub>);  $R_f$  0.86 (1:1 petrol-EtOAc);  $[\alpha]_D -10.8$  (c 1.00 in chloroform);  $\delta_H$  (500 MHz, CDCl<sub>3</sub>) 8.12 (1H, s, CHO), 7.71 (2H, d,  $J$  8.3, 2'''-H), 7.35 (2H, d,  $J$  8.3, 3'''-H), 5.85 (1H, dd,  $J$  10.6 and 1.2, 5''-H), 5.76 (1H, dd,  $J$  10.6 and 1.8, 4''-H), 5.33 (1H, s, 3'-H<sub>a</sub>), 5.16 (1H, s, 3'-H<sub>b</sub>), 5.02 (1H, d,  $J$  3.9, 2''-H), 4.42-4.41 (1H, m, 6''-H), 4.28 (1H, dd,  $J$  11.5 and 4.0, 6''-CCH<sub>a</sub>), 4.25 (1H, dd,  $J$  11.5 and 6.0, 6''-CCH<sub>b</sub>), 4.13-4.11 (1H, m, 3''-H), 4.07 (1H, d,  $J$  12.3, 2'-CCH<sub>a</sub>), 4.06 (1H, d,  $J$  12.3, 2'-CCH<sub>b</sub>), 3.85 (1H, d,  $J$  15.0, 1'-H<sub>a</sub>), 3.79 (1H, d,  $J$  15.0, 1'-H<sub>b</sub>), 3.54 (3H, s, OMe), 3.41-3.38 (2H, m, 1-H), 2.46 (3H, s, 4'''-CCH<sub>3</sub>) and 2.43-2.36 (2H, m, 2-H);  $\delta_C$  (75 MHz, CDCl<sub>3</sub>) 161.1 (CHO), 144.4 (4'''-C), 140.8 (2'-C), 136.0 (1'''-C), 130.3 (3'''-C), 127.6 (2'''-C), 126.7 (5''-C), 126.3 (4''-C), 117.6 (3'-C), 97.3 (2''-C), 72.0 (3''-C), 69.7 (2'-CCH<sub>2</sub>), 67.2 (6''-C), 65.3 (6''-CCH<sub>2</sub>), 56.4 (OMe), 52.1 (1'-C), 40.9 (1-C), 31.0 (t,  $^2J_{C-F}$  21.3, 2-C) and 21.9 (4'''-CCH<sub>3</sub>);  $\nu_{\max}/\text{cm}^{-1}$  3043, 2928, 2857, 1726, 1657, 1598, 1494 and 1399;  $m/z$  (ES<sup>+</sup>) 880 (100%, MNa<sup>+</sup>). (Found: MNa<sup>+</sup> 880.1202, C<sub>29</sub>H<sub>28</sub>F<sub>17</sub>NO<sub>7</sub>S requires MNa, 880.1207).

**N-(3,3,4,4,5,5,6,6,7,7,8,8,9,9,10,10,10-Heptafluorodecyl)-N-[2-[(2S,3R,6S)-2-methoxy-6-((2-nitrophenylsulfonamido)methyl)-3,6-dihydro-2H-pyran-3-yloxy]methyl]allyl]-4-methylbenzenesulfonamide **18****

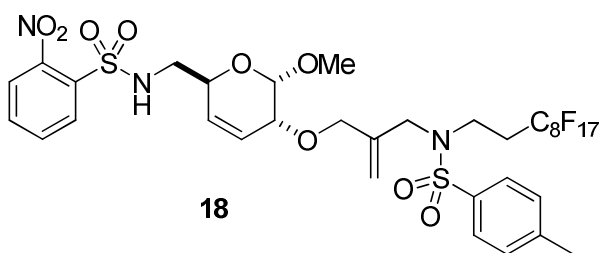

Following general procedure **B**, diethyl azodicarboxylate (441  $\mu\text{L}$ , 2.41 mmol), nosyl-Boc-amine (728 mg, 2.41 mmol) and alcohol **1** (500 mg, 0.60 mmol) gave the crude product after 3 hours. The crude product was purified by Fluorous Solid Phase Extraction; 10 g cartridge, loading with <1.00 mL dichloromethane, eluting with 80:20 MeOH-H<sub>2</sub>O followed by MeOH to give the fluorous fraction, the Boc-protected sulfonamide **17**. Sulfonamide **17** (1.20 g, 1.08 mmol) was subsequently dissolved in dimethyl sulfoxide (40 mL) and heated at reflux for 20 minutes. The dimethyl

sulfoxide was removed under reduced pressure to give a crude product which was purified by flash chromatography, eluting with 50:50 petrol–EtOAc, to give *sulfonamide* **18** (1.01 g, 88% over 2 steps) as a colourless foam,  $R_f$  0.43 (50:50 petrol–EtOAc);  $[\alpha]_D^{20} +40.4$  ( $c$  1.00 in chloroform);  $\delta_H$  (500 MHz,  $CDCl_3$ ) 8.14 (1H, dd,  $J$  7.5 and 3.4, nosyl 3-H), 7.90 (1H, dd,  $J$  7.5 and 3.4, nosyl 6-H), 7.79–7.72 (2H, m, nosyl 4-H and 5-H), 7.69 (2H, d,  $J$  8.1, tosyl 2-H and 6-H), 7.34 (2H, d,  $J$  8.1, tosyl 3-H and 5-H), 5.72–5.67 (2H, m, 5-H and NH), 5.57 (1H, app. d,  $J$  10.3, 4-H), 5.28 (1H, s,  $NCH_2C=CH_A$ ), 5.12 (1H, s,  $NCH_2C=CH_B$ ), 4.80 (1H, d,  $J$  3.7, 2-H), 4.23–4.18 (1H, m, 6-H), 3.97 (2H, s, 3-COCH<sub>2</sub>), 3.91–3.88 (1H, m, 3-H), 3.81 (1H, d,  $J$  15.0,  $NCH_A CCH_2$ ), 3.74 (1H, d,  $J$  15.0,  $NCH_B CCH_2$ ), 3.45 (1H, ddd,  $J$  13.3, 6.5 and 3.4, 6-CCH<sub>A</sub>), 3.19 (1H, ddd,  $J$  13.3, 8.8 and 5.7, 6-CCH<sub>B</sub>), 3.38 (3H, s, OMe), 3.38–3.33 (2H, m,  $CF_2CH_2CH_2$ ), 2.44 (3H, s, tosyl Me), 2.42–2.29 (2H, m,  $CF_2CH_2$ );  $\delta_C$  (75 MHz;  $CDCl_3$ ) 148.0 (nosyl 2-C), 144.1 (tosyl 4-C), 140.4 (3-COCH<sub>2</sub>CCH<sub>2</sub>), 135.8 (tosyl 1-C), 134.3 (nosyl 1-C), 133.6 (nosyl 6-C), 132.8 (nosyl 3-C), 131.0 (nosyl 4-C), 130.0 (tosyl 3-C and 5-C), 127.2 (tosyl 2-C and 6-C), 126.7 (5-C), 126.4 (4-C), 125.5 (nosyl 5-C), 117.3 (3-COCH<sub>2</sub>C=CH<sub>2</sub>), 96.8 (2-C), 71.8 (3-C), 69.4 (3-COCH<sub>2</sub>), 67.1 (6-C), 55.9 (OMe), 51.7 ( $NCH_2CCH_2$ ), 47.3 (6-CCH<sub>2</sub>), 40.4 ( $CF_2CH_2CH_2$ ), 30.6 ( $CF_2CH_2$ ), 21.5 (tosyl Me);  $\nu_{max}/cm^{-1}$  3354, 3095, 2990, 2934, 2869, 1597, 1538 and 1443;  $m/z$  (ES<sup>+</sup>) 1036.1 ( $[M + Na]^+$  100%); found  $MNa^+$  1036.1189,  $C_{34}H_{32}F_{17}N_3O_9S_2$  requires  $MNa$  1036.1201.

## References

1. W. C. Still, M. Kahn, and A. Mitra, *J. Org. Chem.*, 1978. **43**, 2923.
2. Z. Luo, Q. Zhang, Y. Oderaotoshi, and D. P. Curran, *Science*, 2001. **291**, 1766.
3. D. P. Curran and Z. Luo, *J. Am. Chem. Soc.*, 1999. **121**, 9069.

500 MHz <sup>1</sup>H NMR of S1

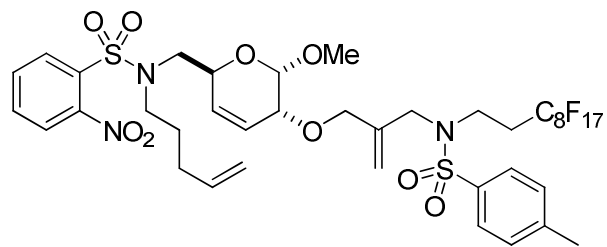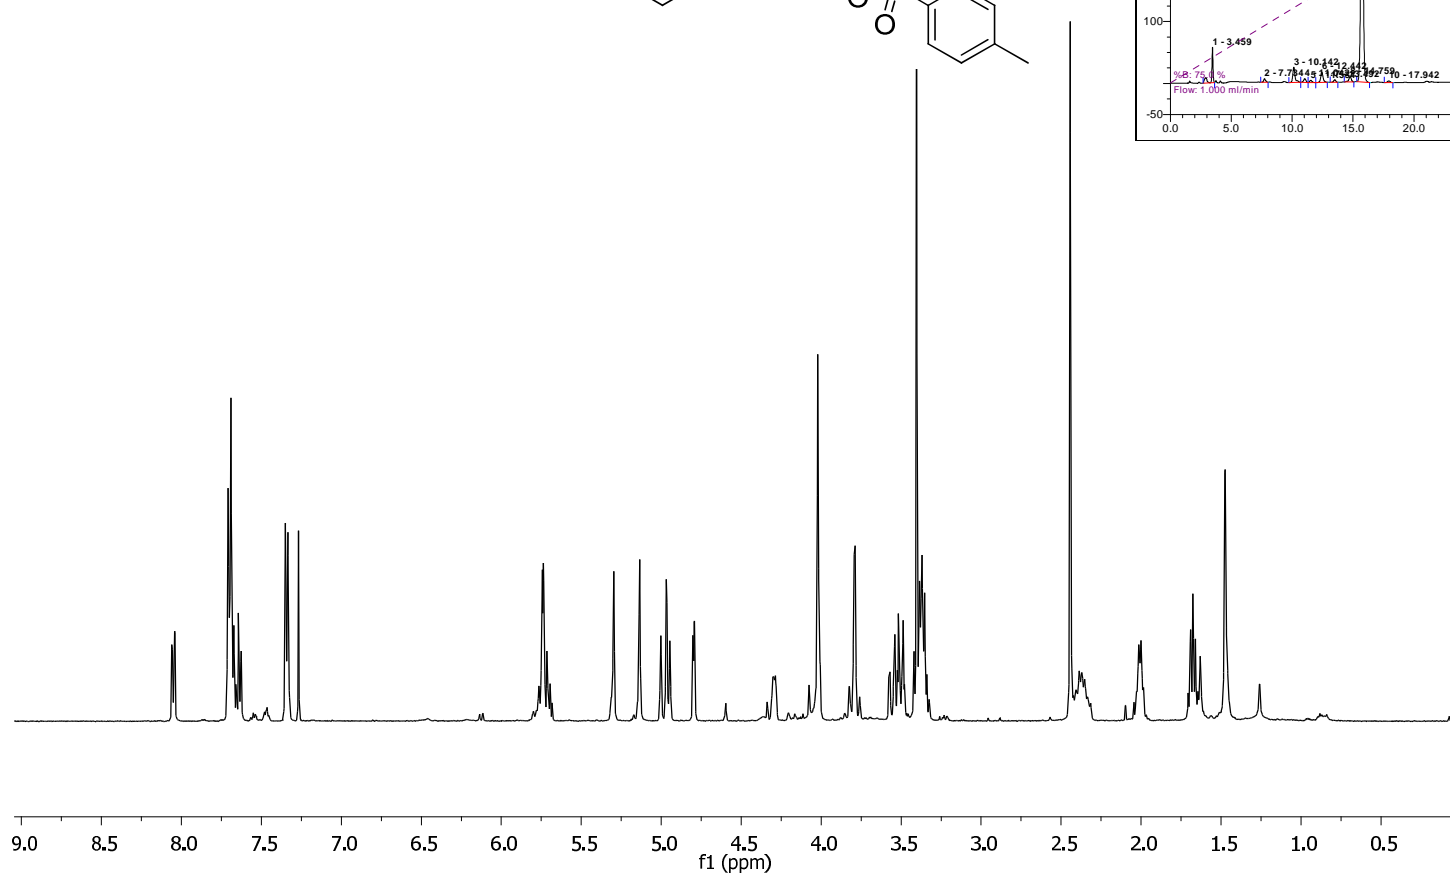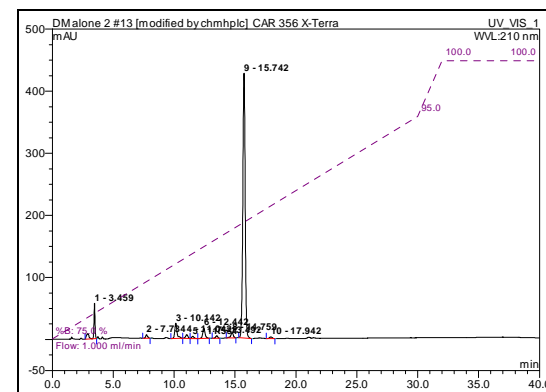



75 MHz  $^{13}\text{C}$  NMR of S1

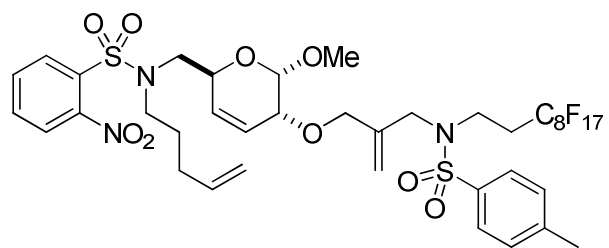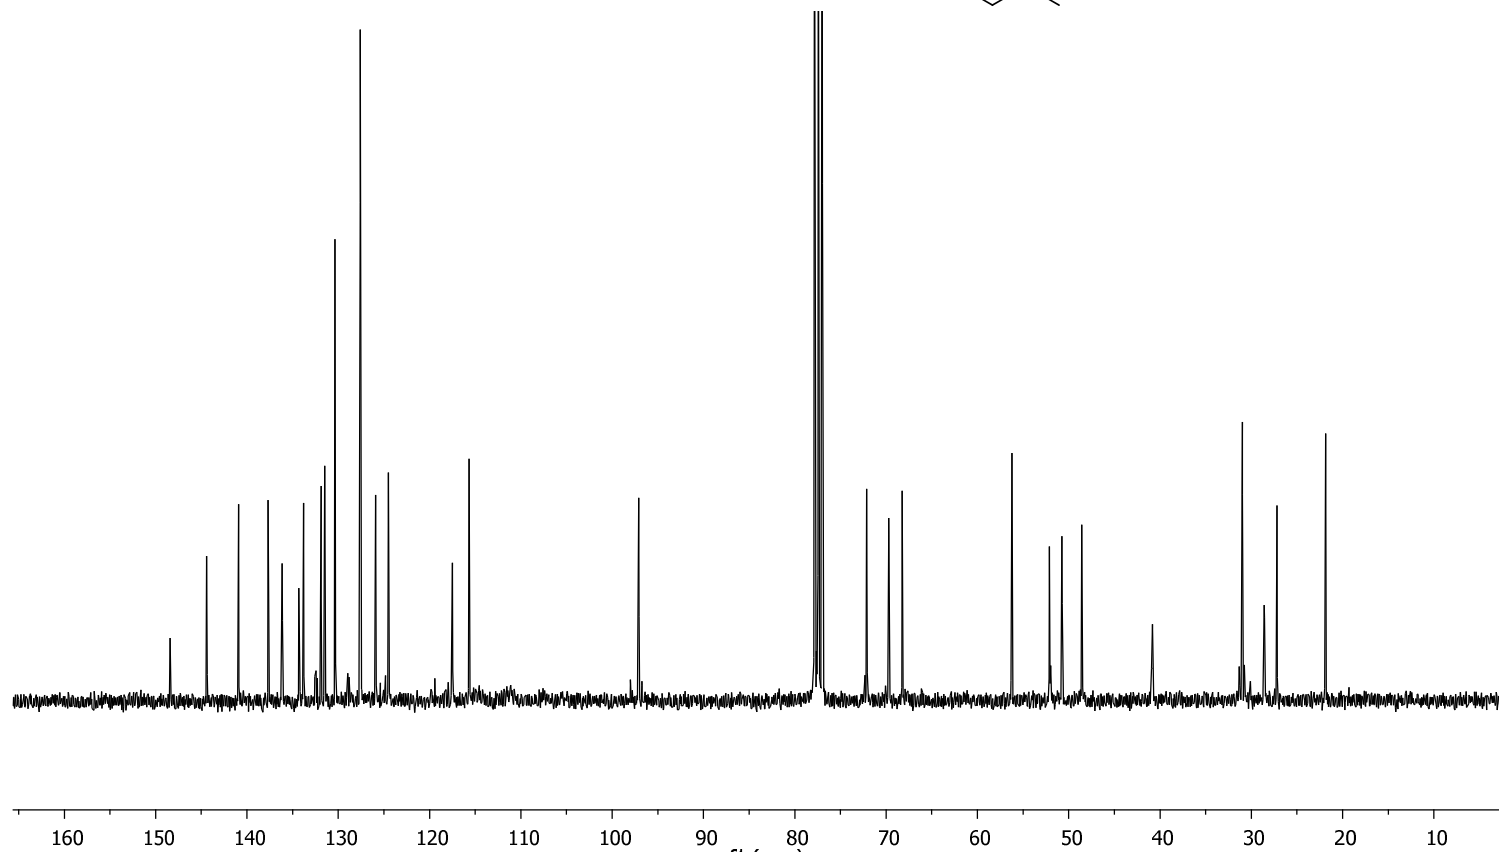

500 MHz  $^1\text{H}$  NMR of S2 (F-SPE purified only)

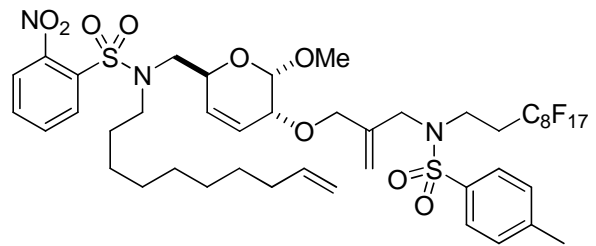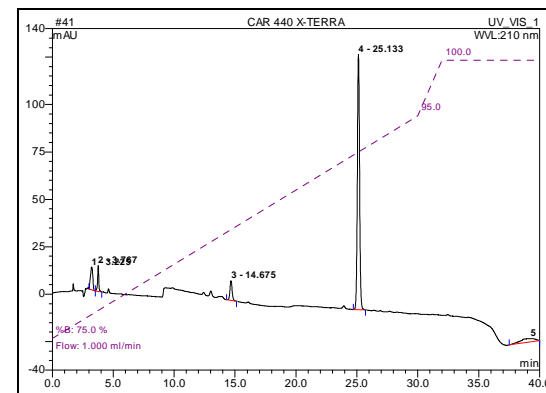

HPLC trace after F-SPE purification only

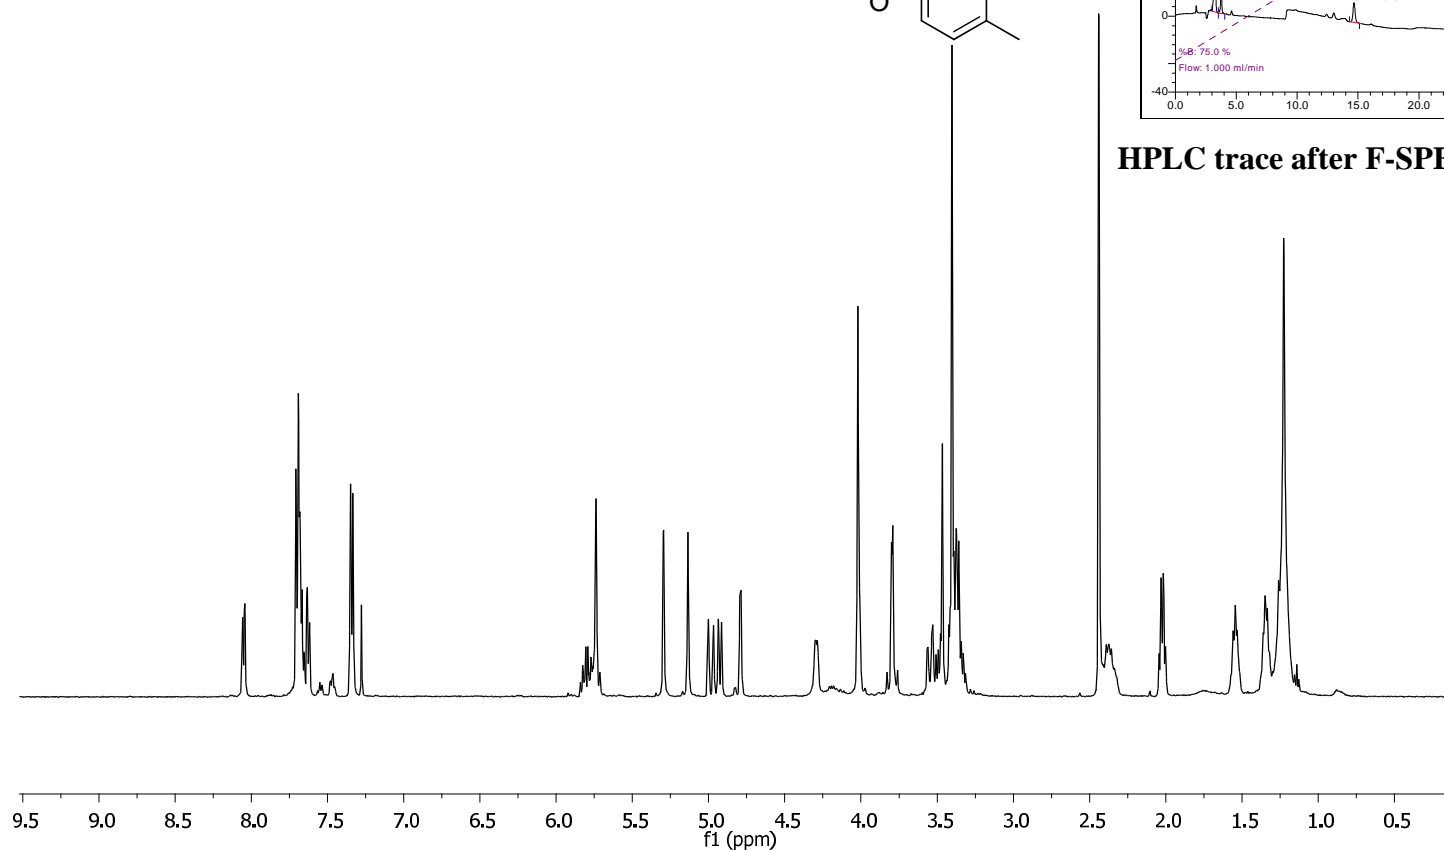

75 MHz  $^{13}\text{C}$  NMR of S2

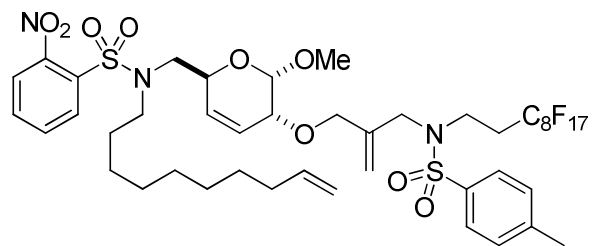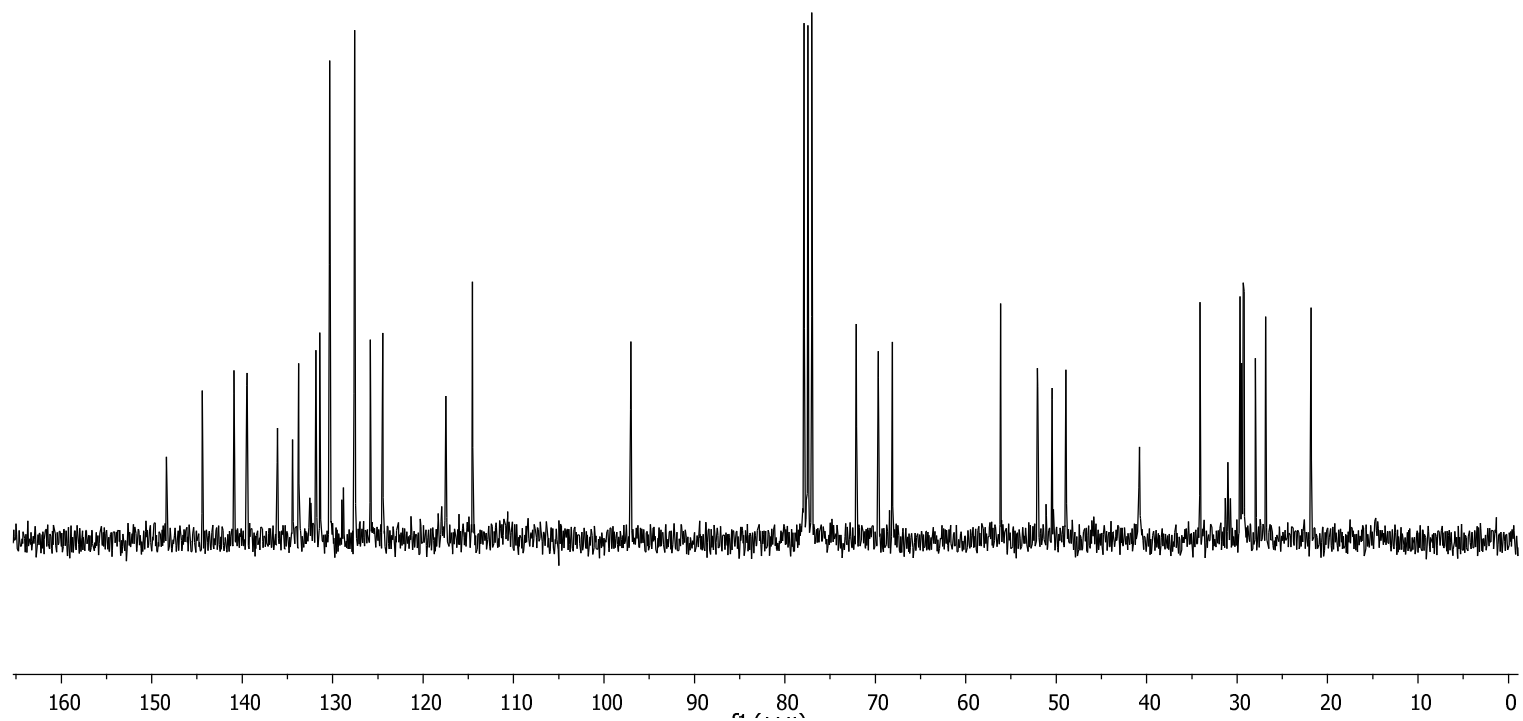

500 MHz  $^1\text{H}$  NMR of S3 (F-SPE purified only)

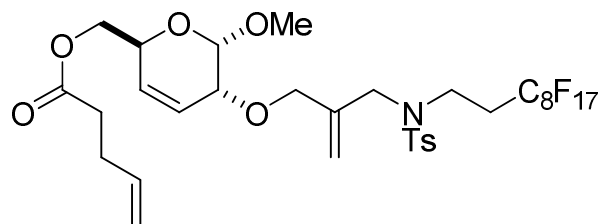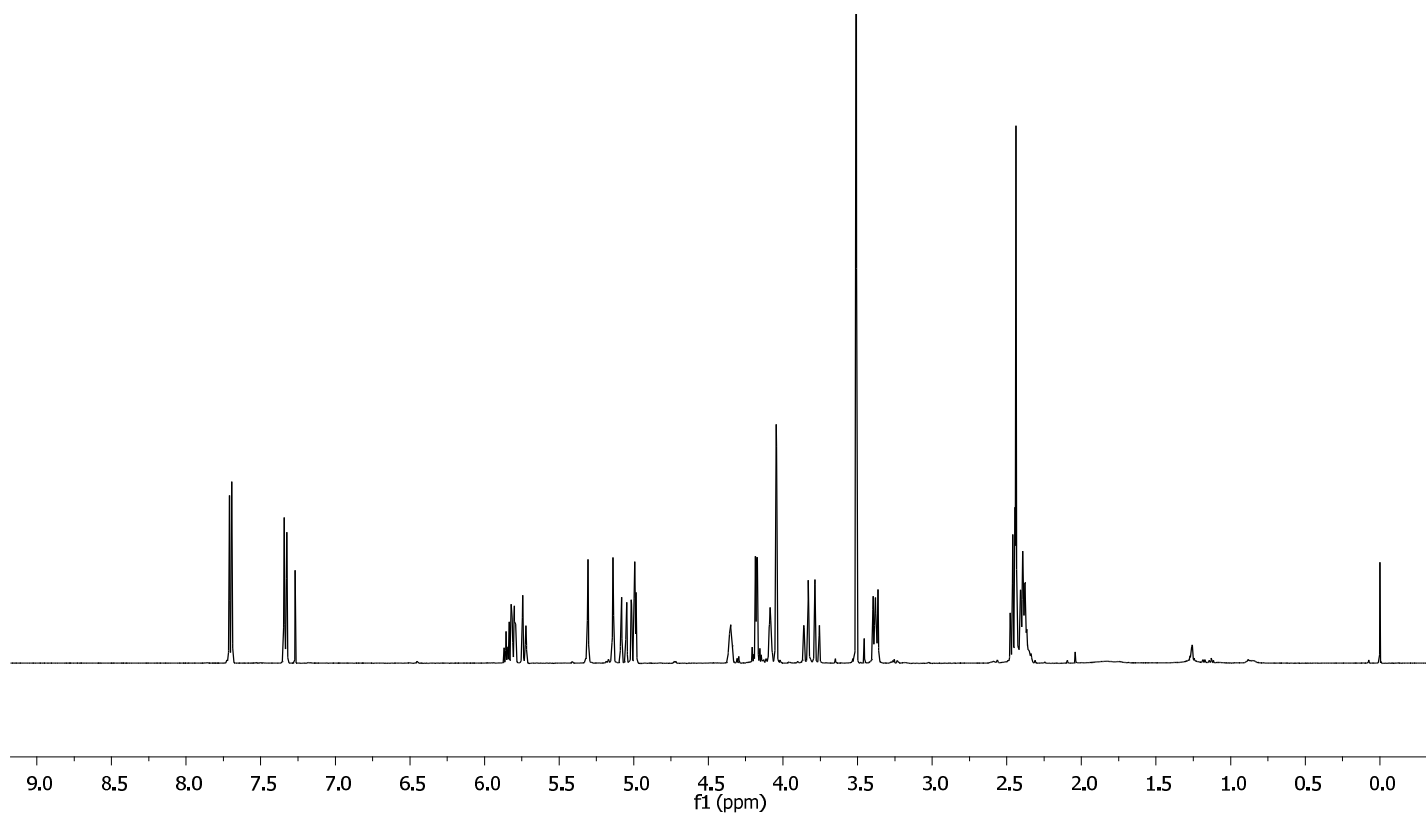



500 MHz  $^1\text{H}$  NMR of S4 (F-SPE purified only)

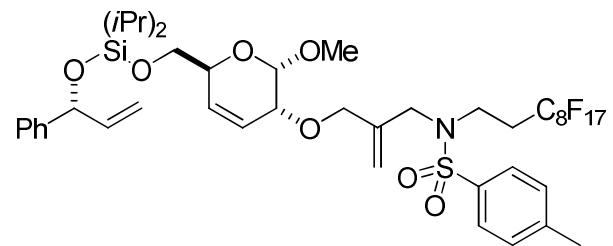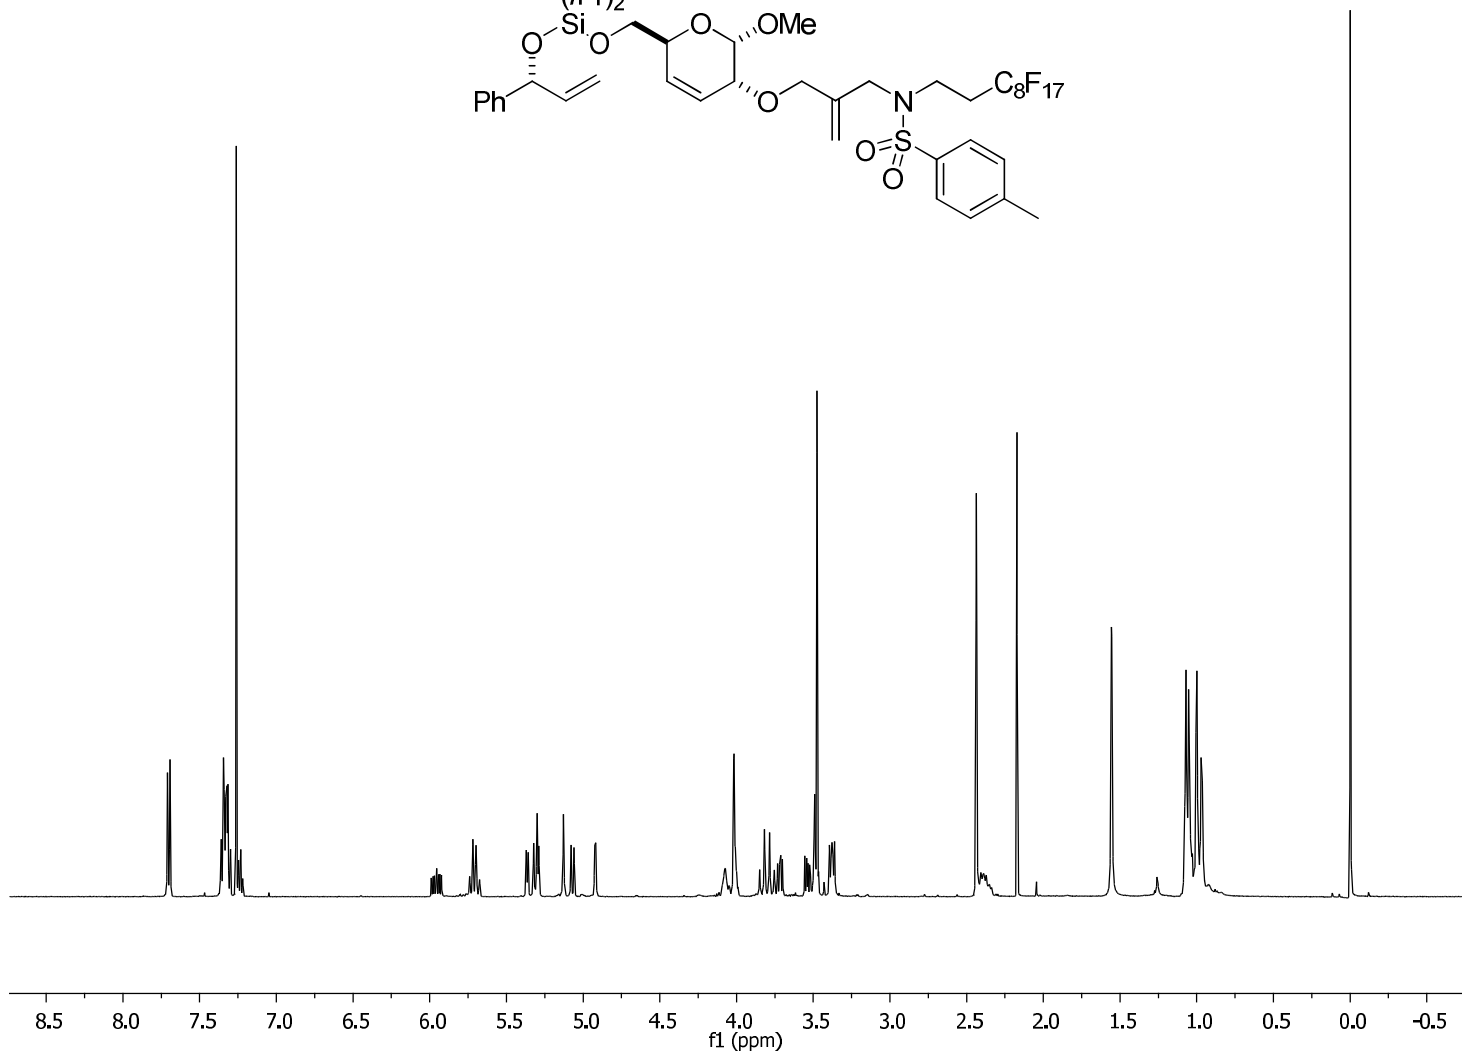



500 MHz  $^1\text{H}$  NMR of S5 (F-SPE purified only)

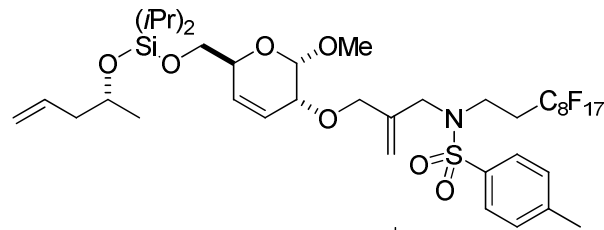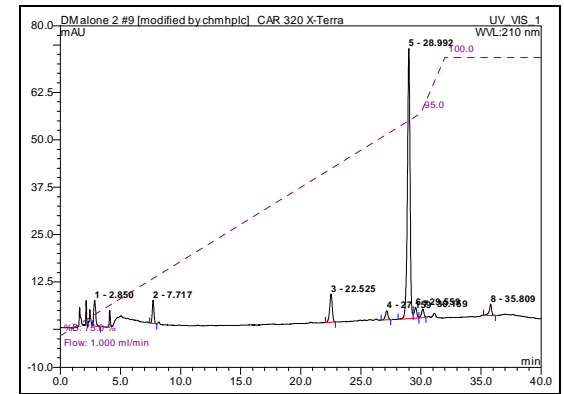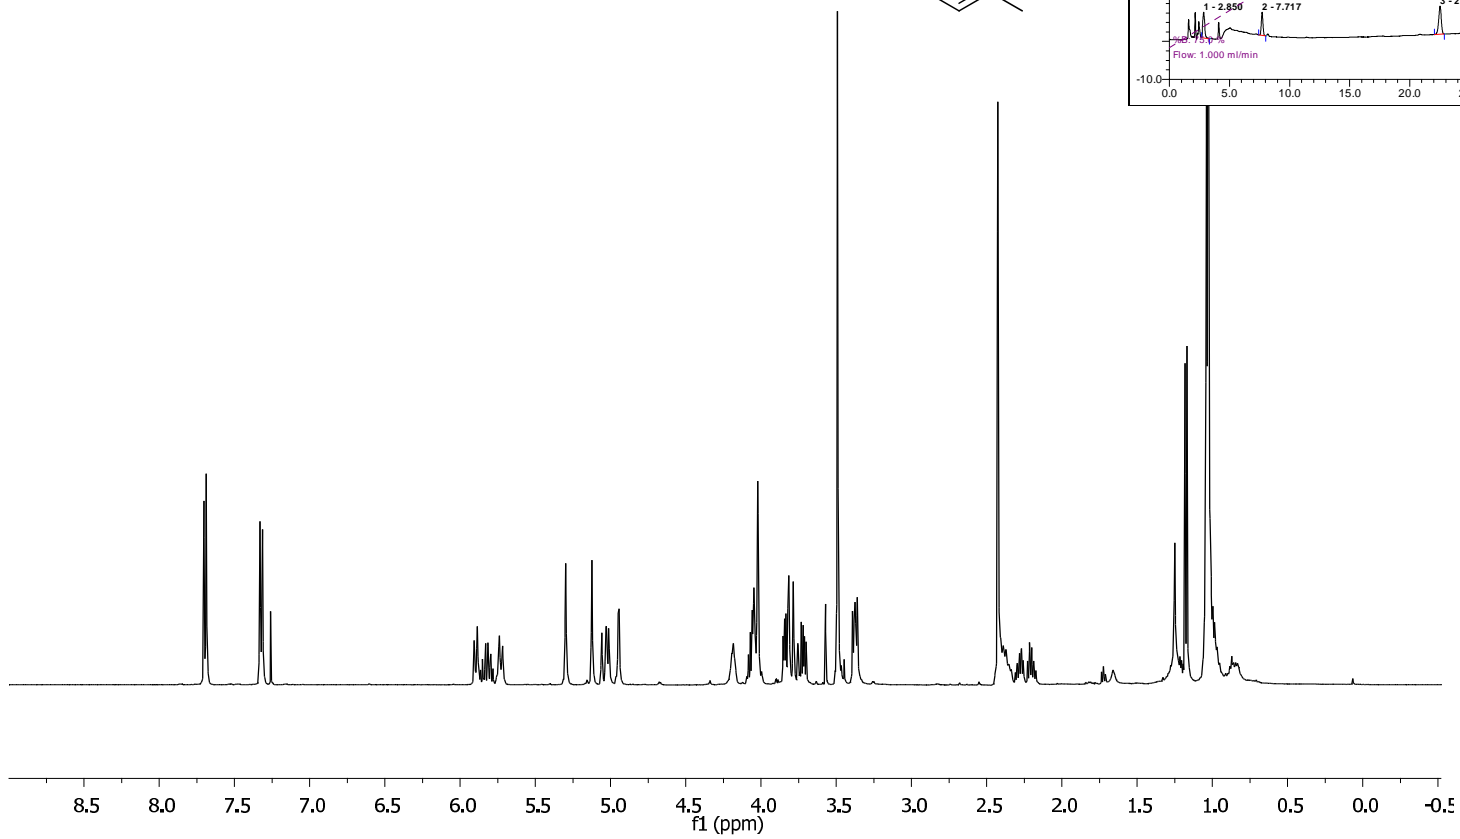



75 MHz  $^{13}\text{C}$  NMR of S5

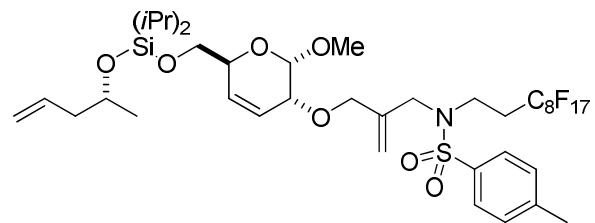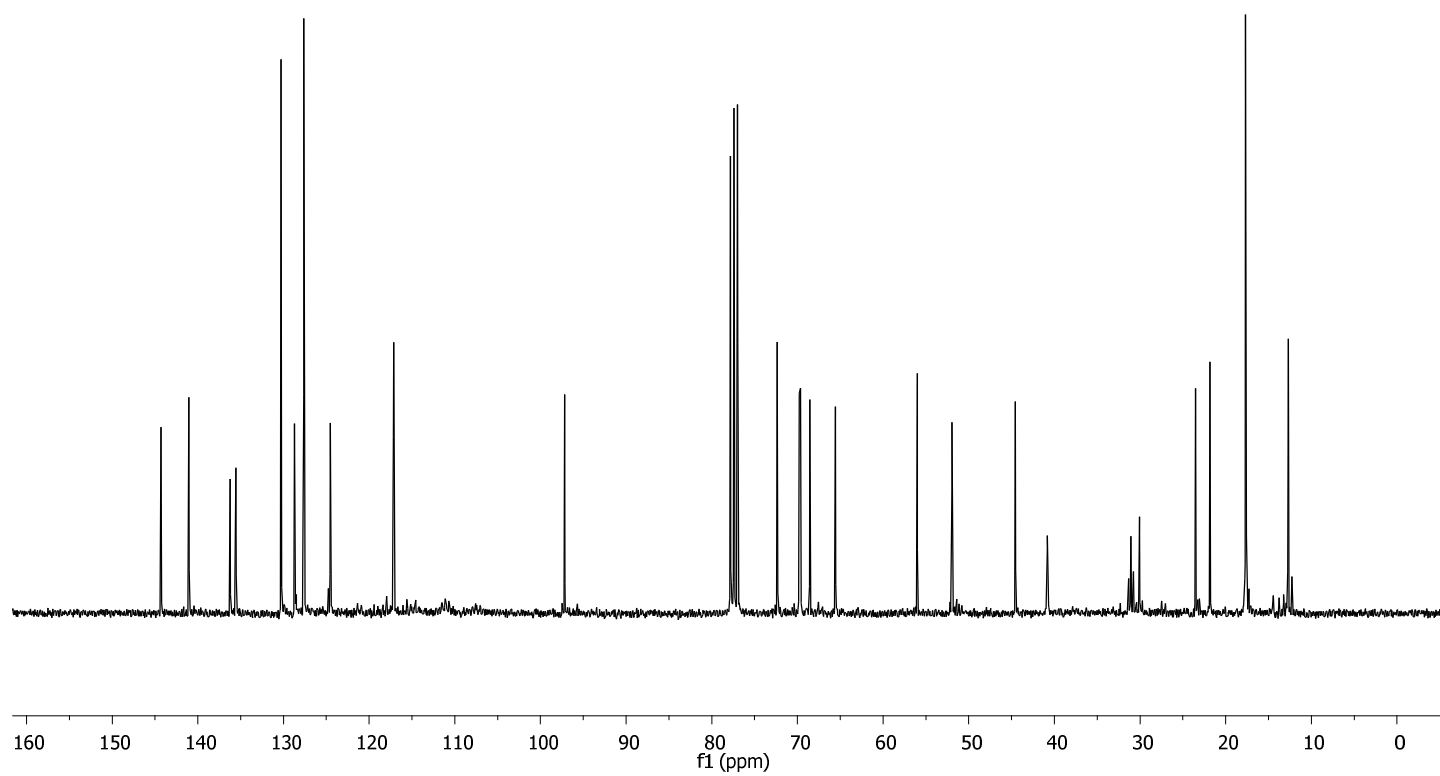

500 MHz  $^1\text{H}$  NMR of S6 (F-SPE purified only)

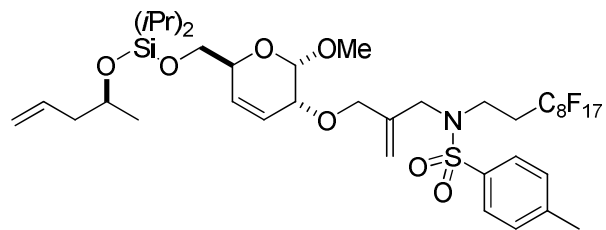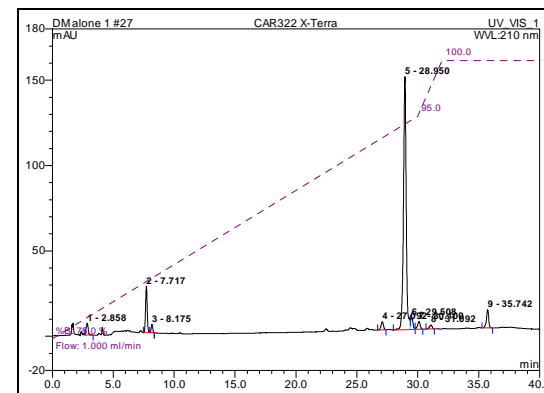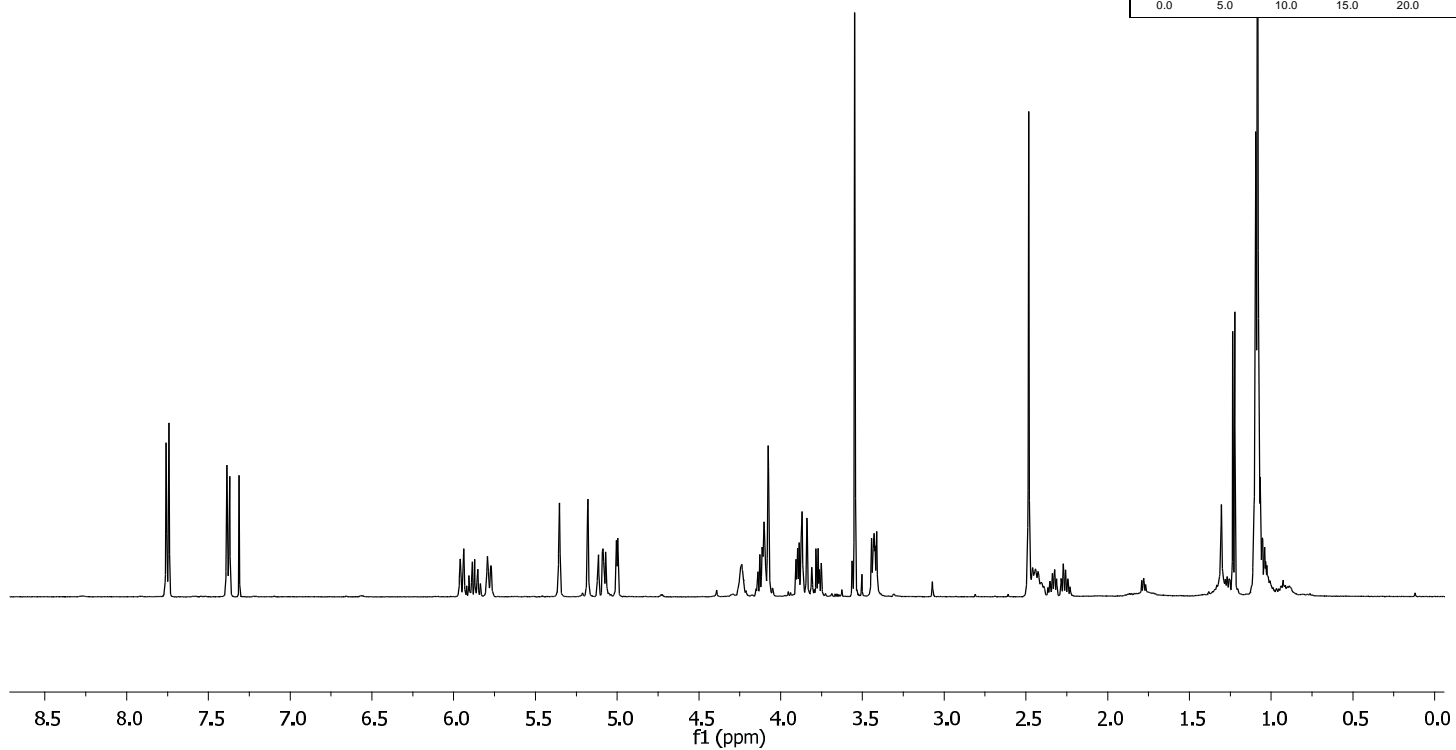

75 MHz  $^{13}\text{C}$  NMR of S6

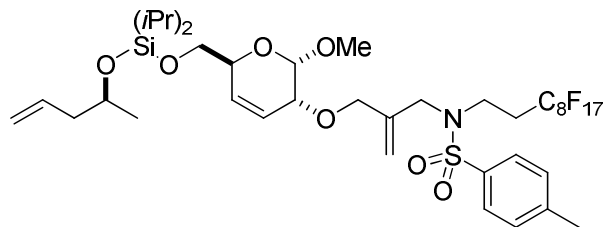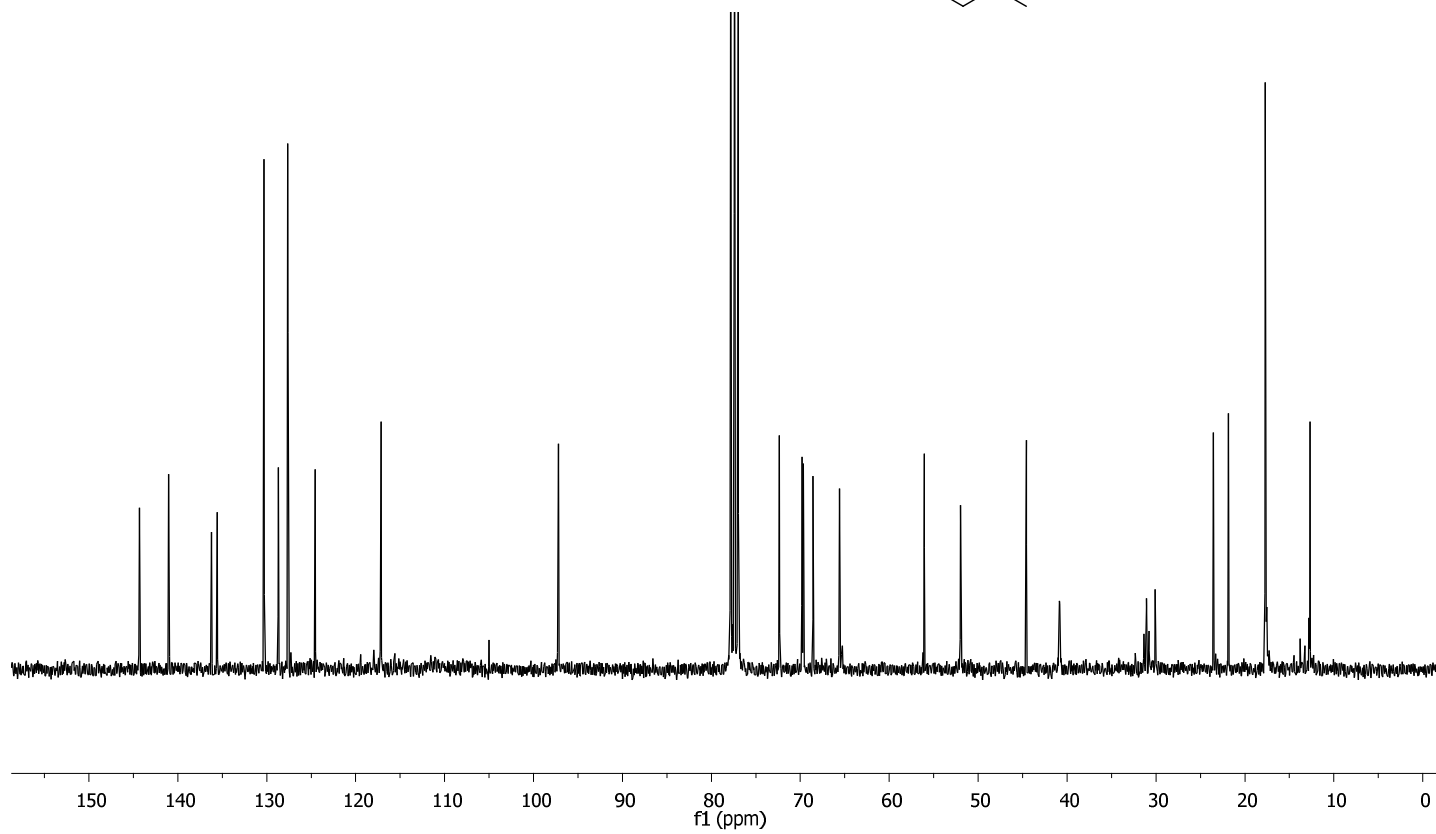

500 MHz  $^1\text{H}$  NMR of 22

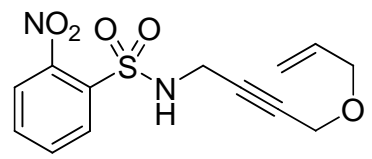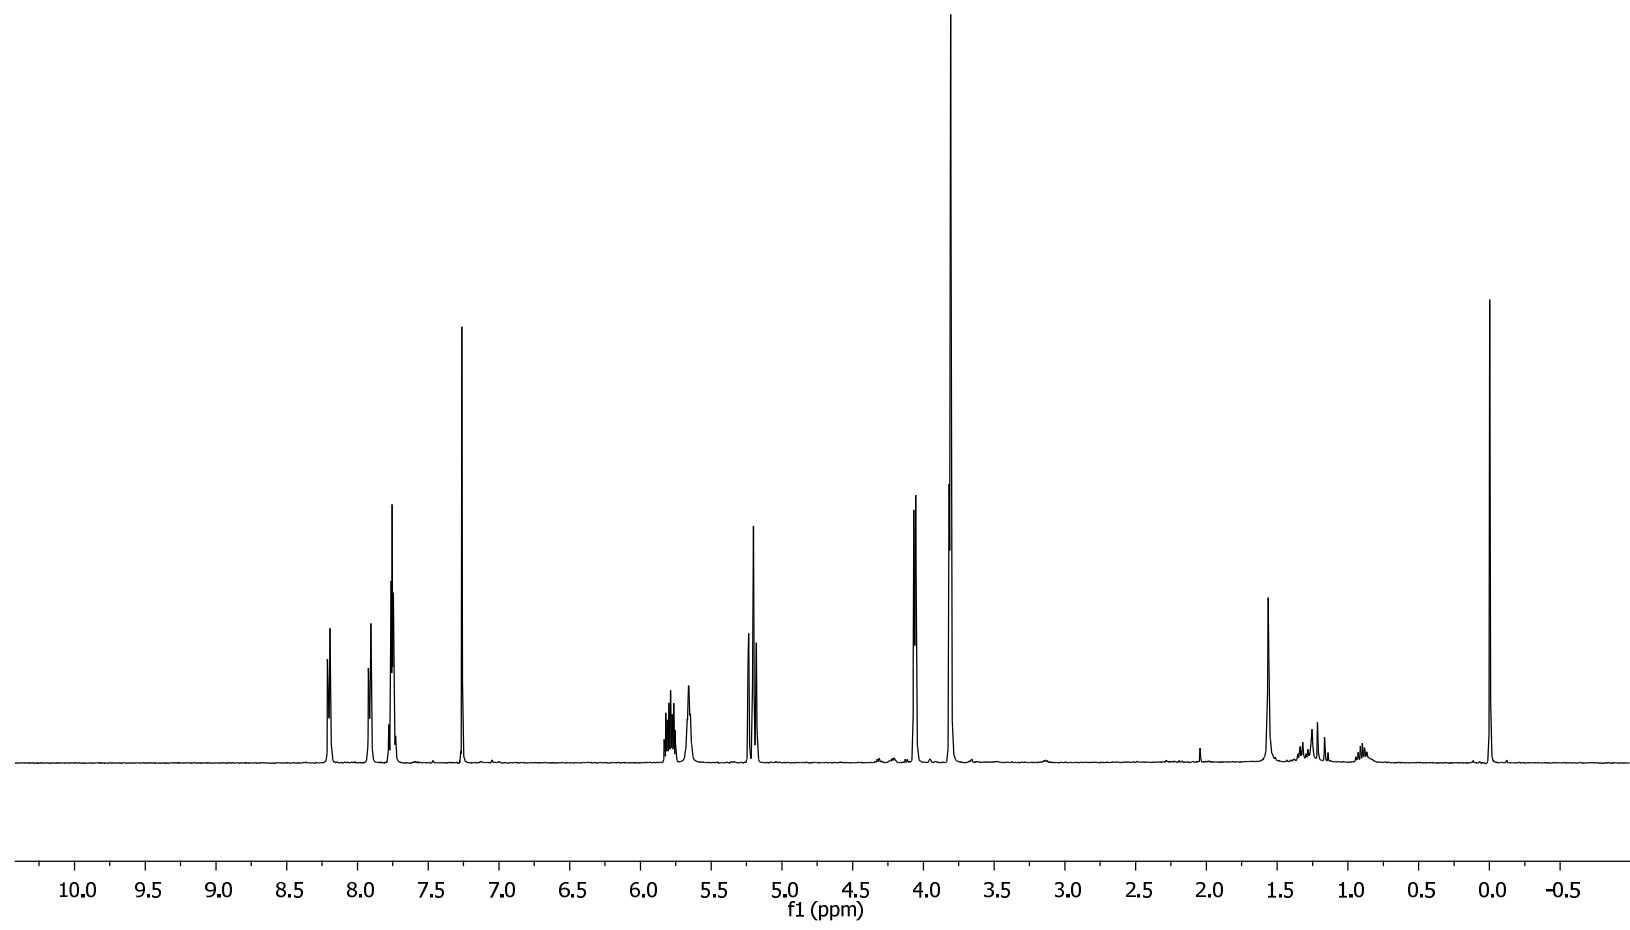

75 MHz  $^{13}\text{C}$  NMR of 22

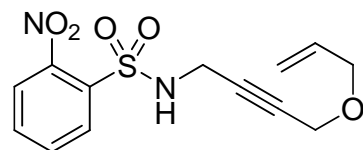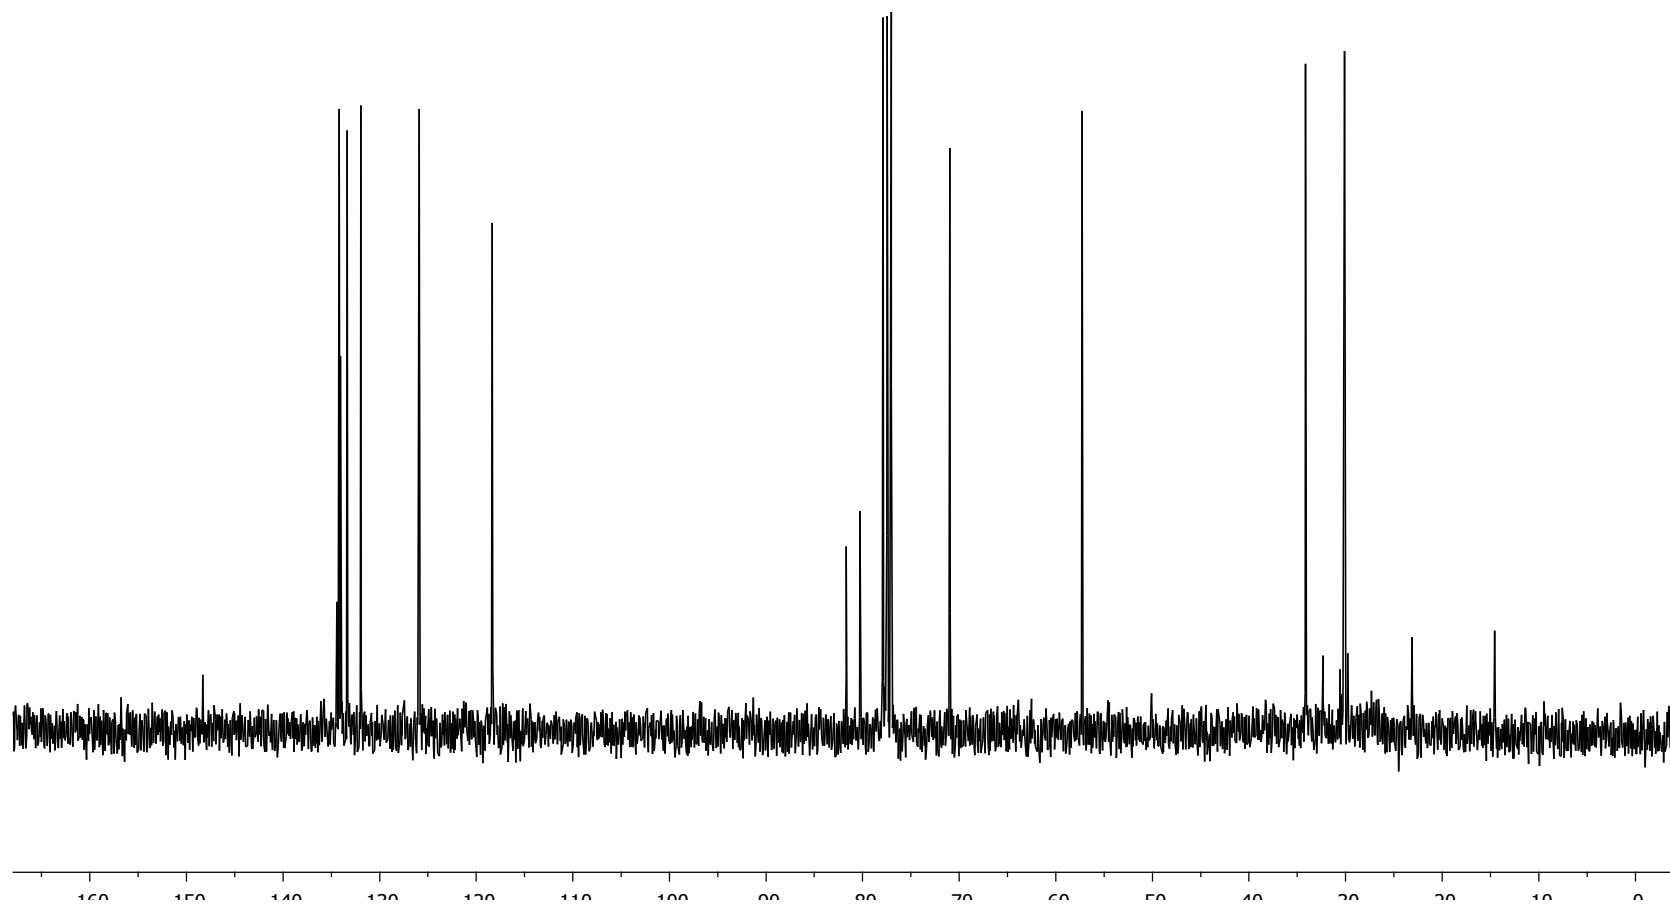

500 MHz  $^1\text{H}$  NMR of S7 (F-SPE purified only)

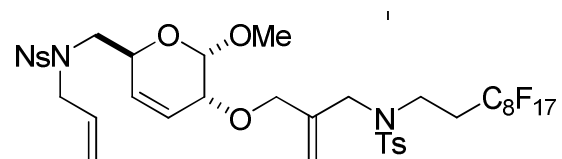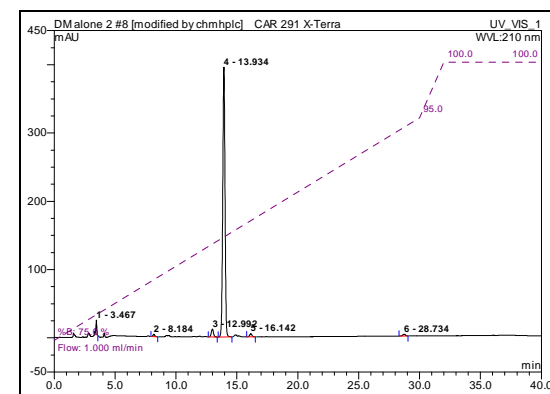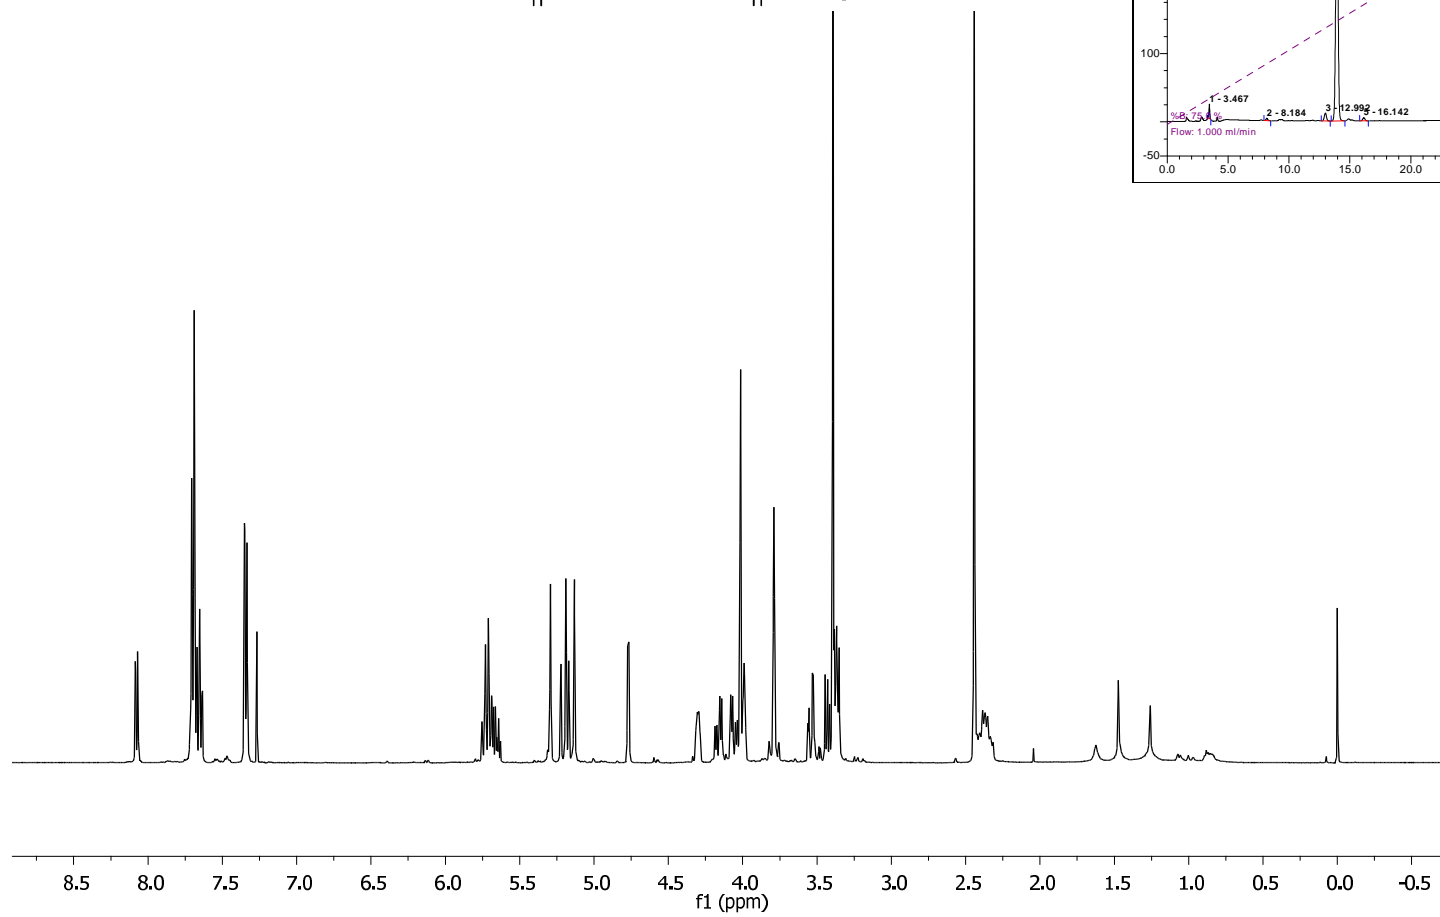

75 MHz <sup>13</sup>C NMR of S7

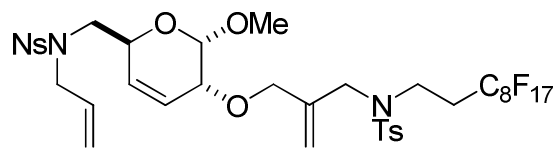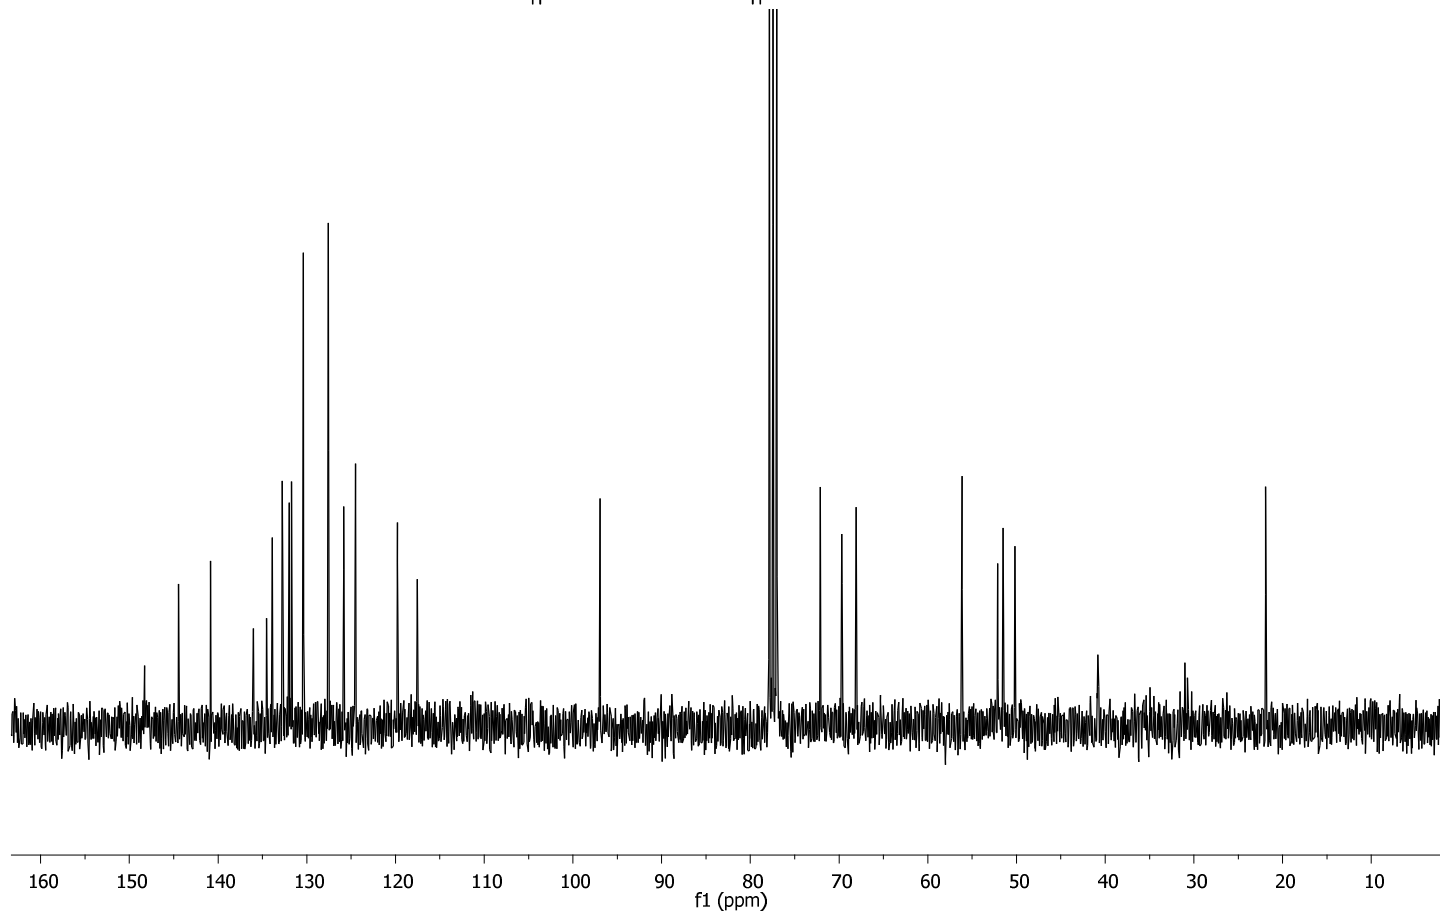

**$^1\text{H}$  NMR of 26 (R = R<sup>F</sup>) (F-SPE purified only)**

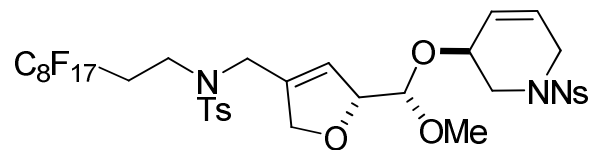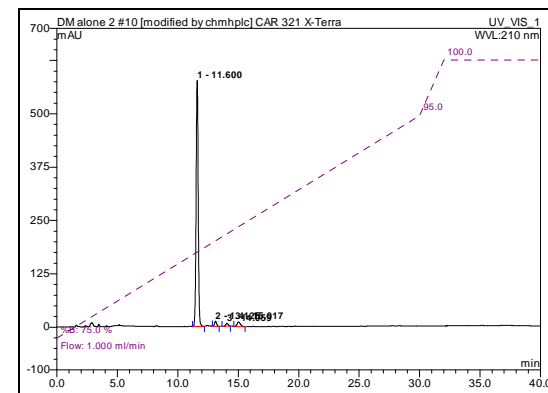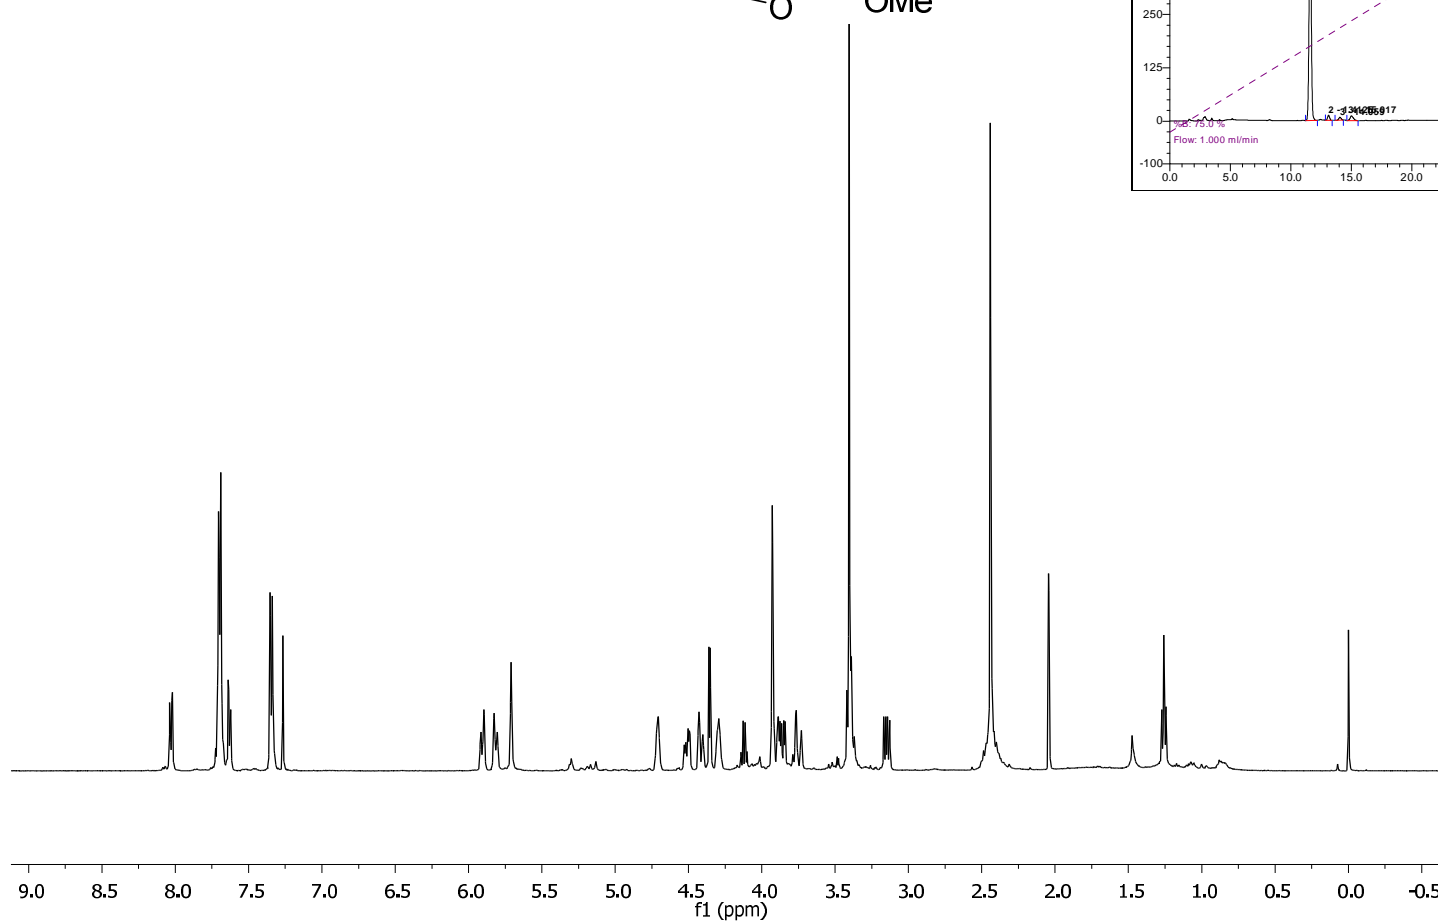



75 MHz  $^{13}\text{C}$  NMR of 26 ( $\text{R} = \text{R}^{\text{F}}$ )

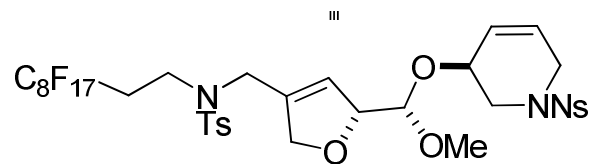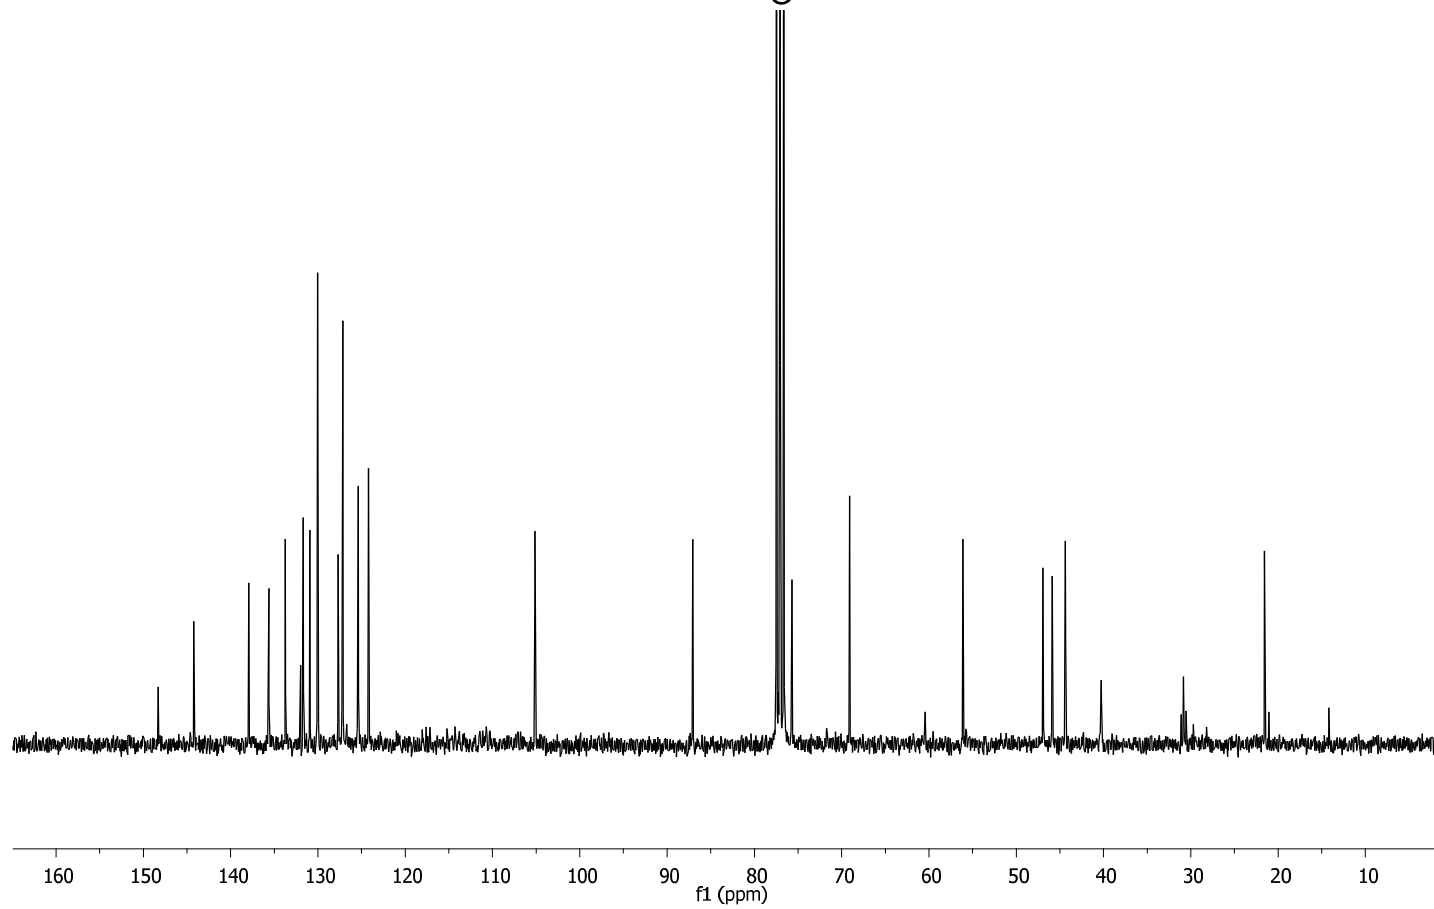

500 MHz  $^1\text{H}$  NMR of 26 (R = H)

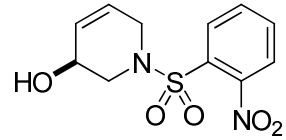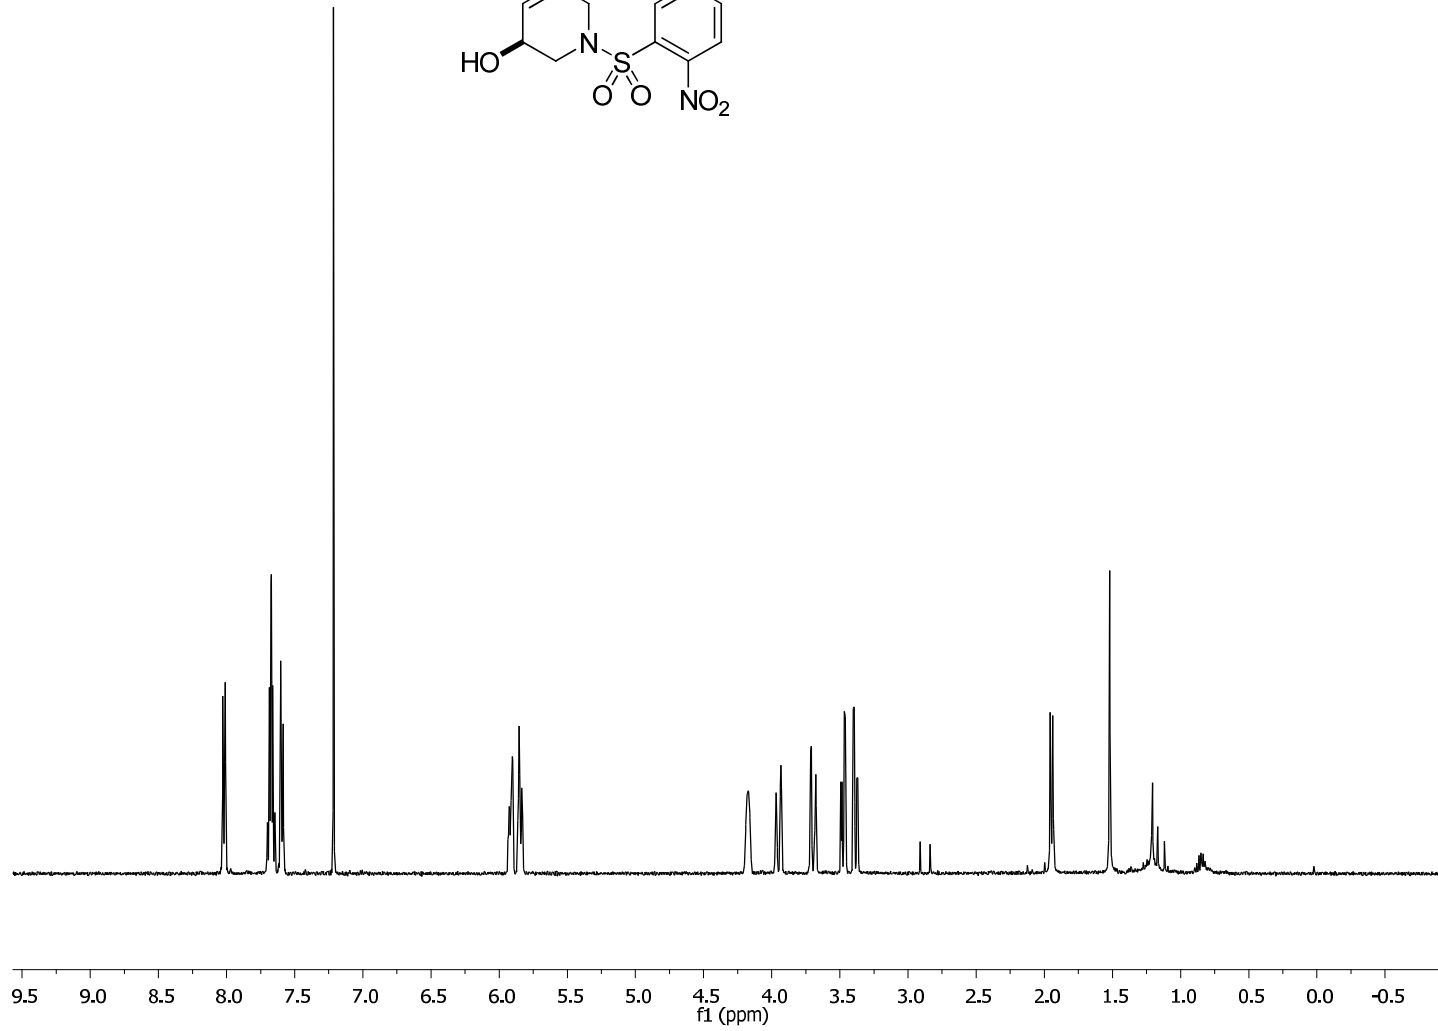

75 MHz  $^{13}\text{C}$  NMR of 26 (R = H)

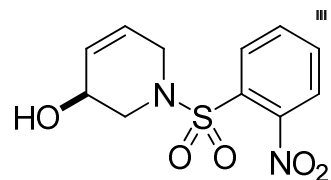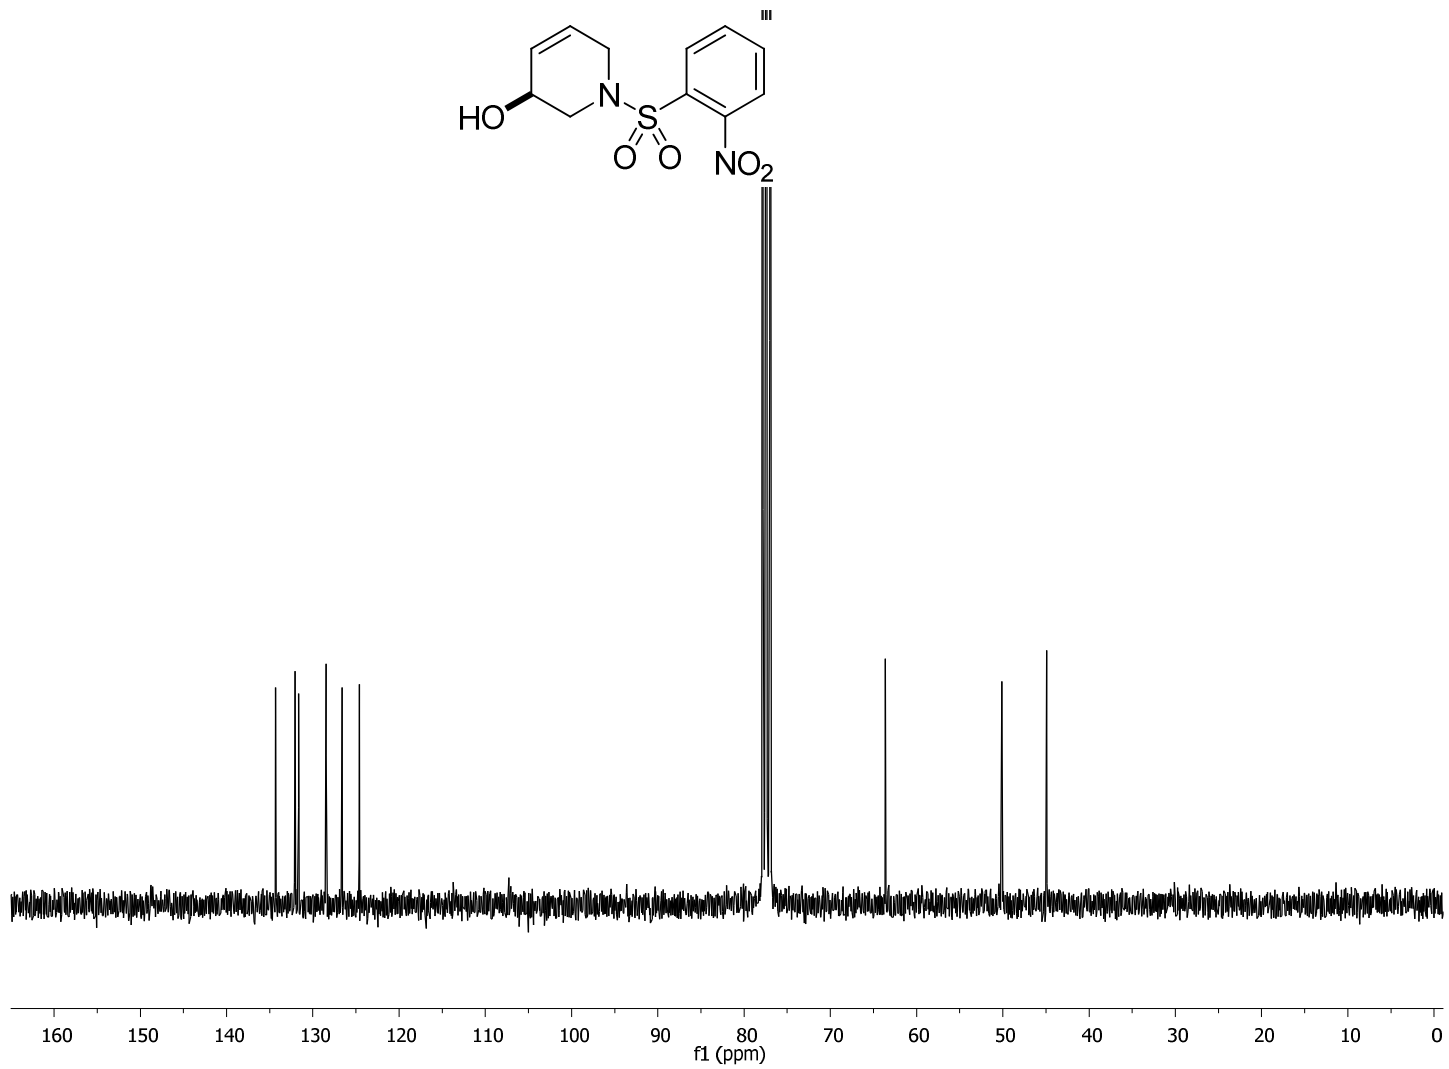

500 MHz  $^1\text{H}$  NMR of S8 (F-SPE purified only)

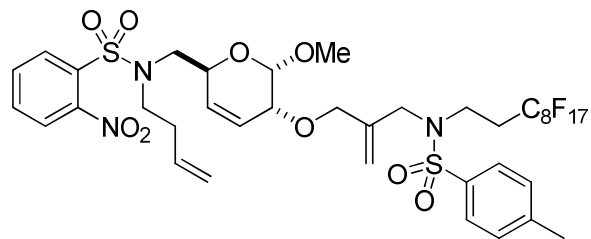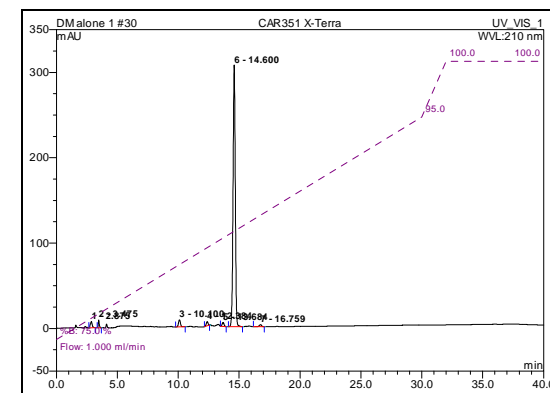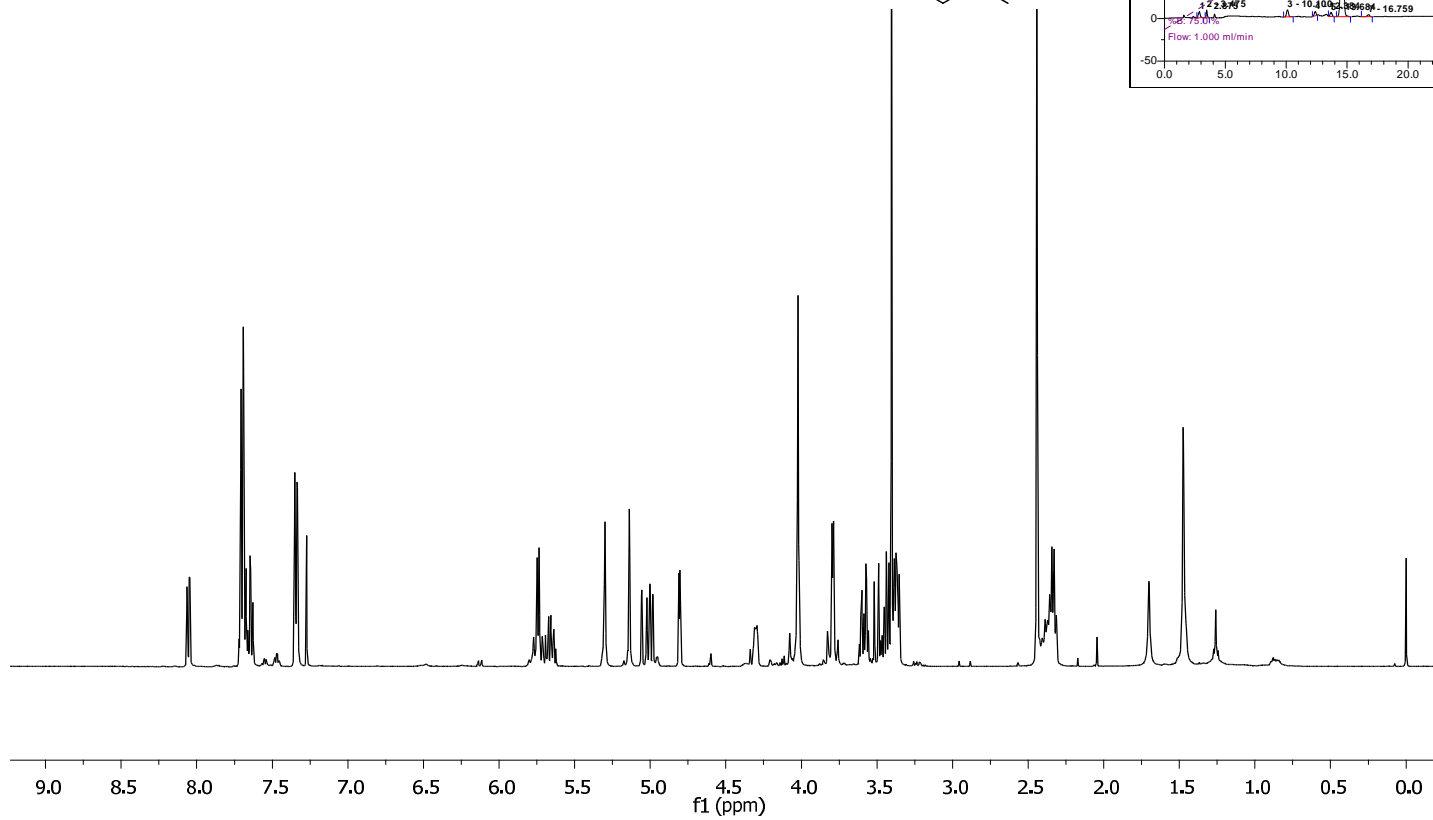

75 MHz  $^{13}\text{C}$  NMR of S8

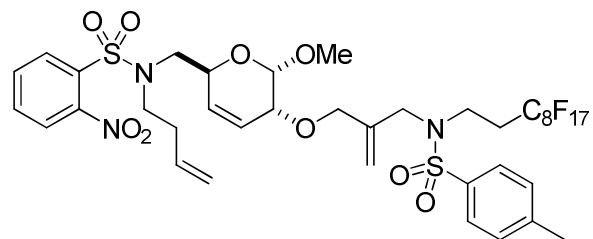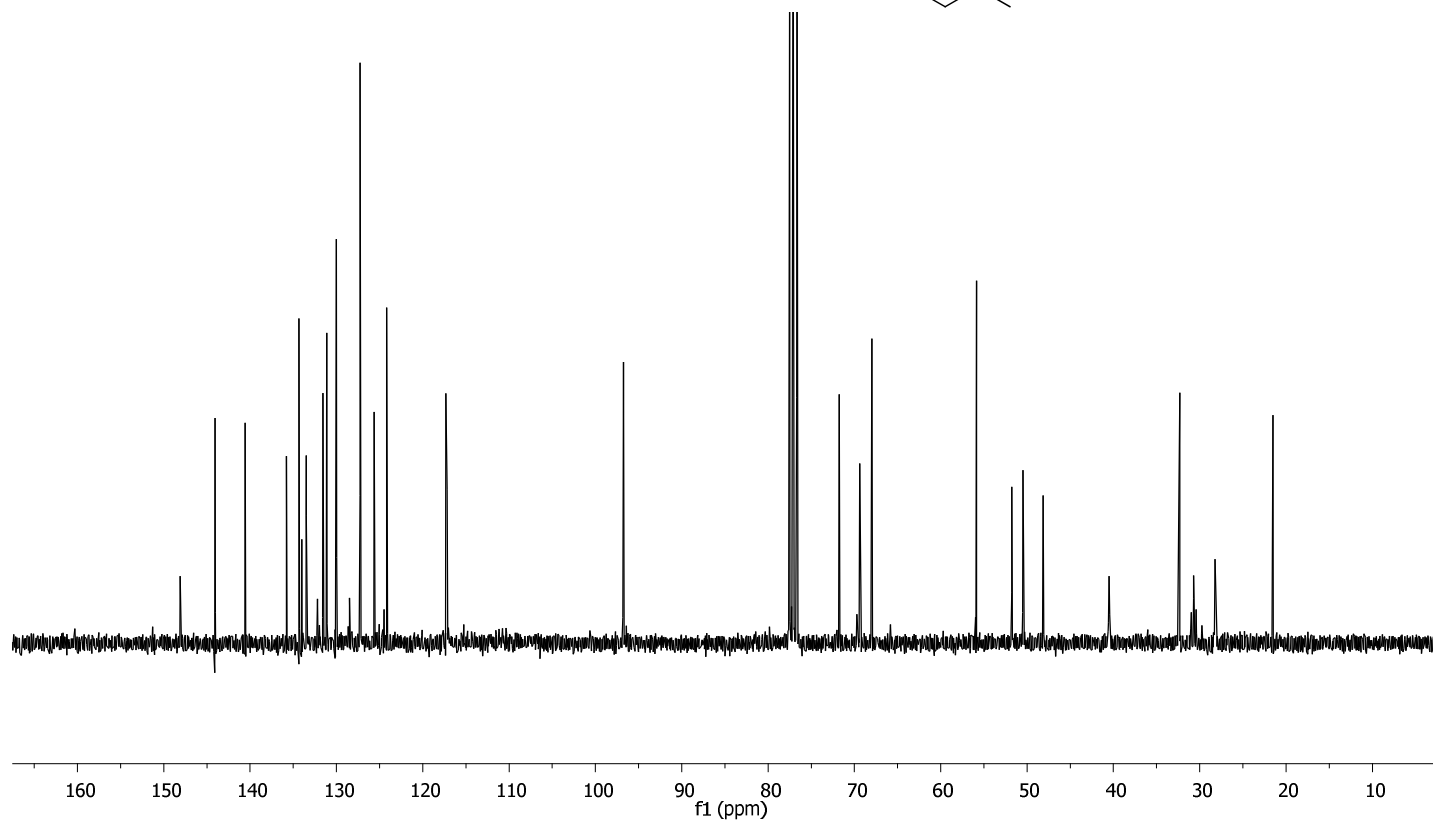

**$^1\text{H}$  NMR of 27 (R = R<sup>F</sup>) (F-SPE purified only)**

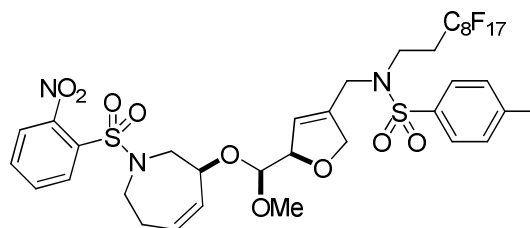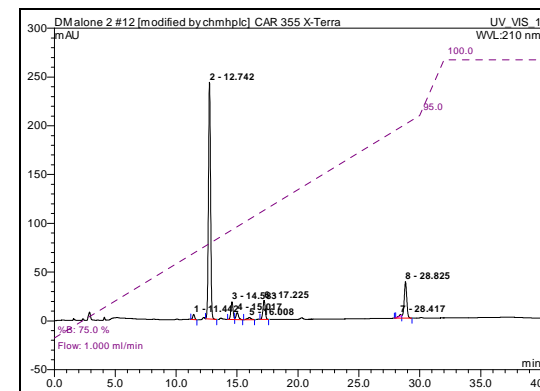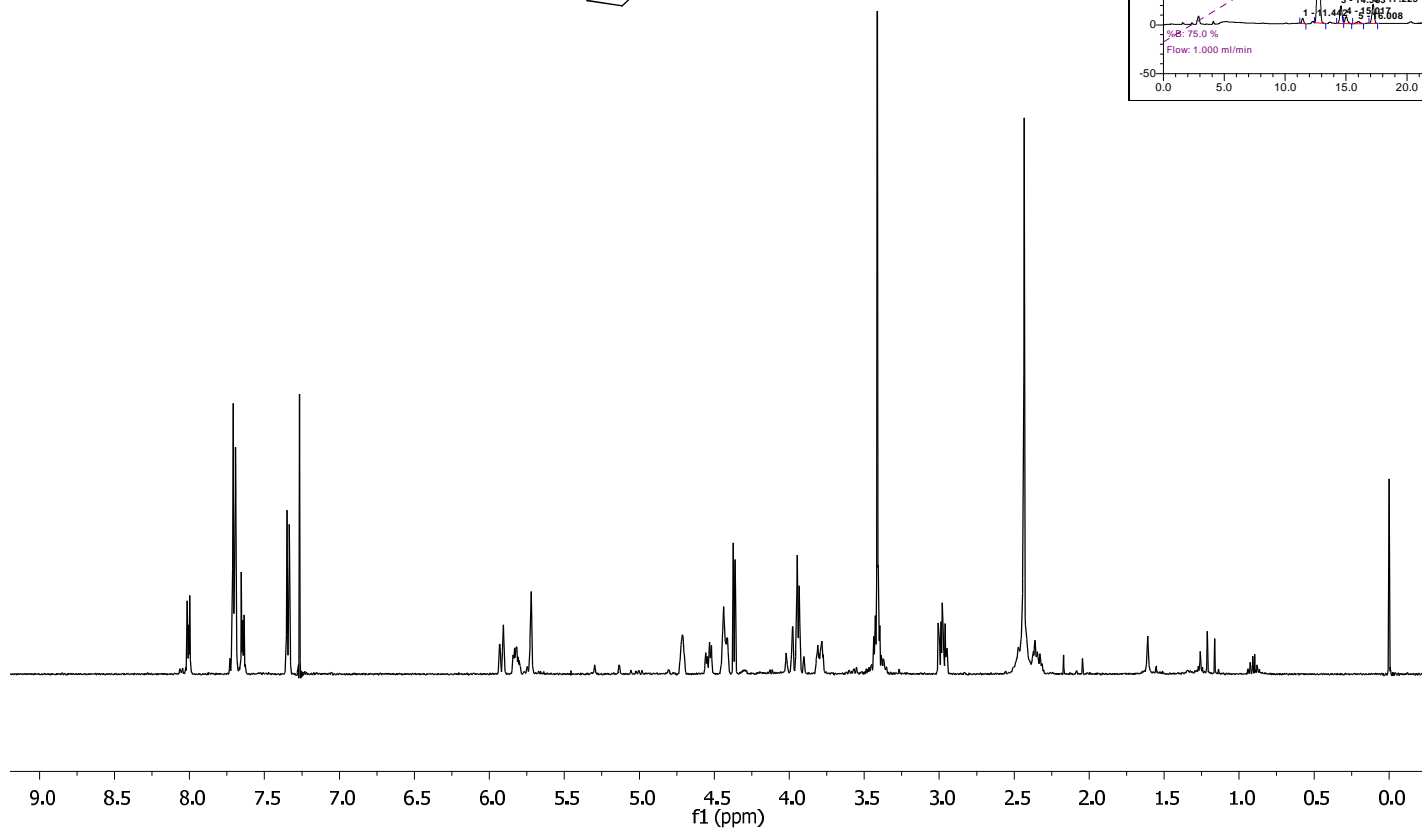

75 MHz  $^{13}\text{C}$  NMR of 27 ( $\text{R} = \text{R}'^{\text{F}}$ )

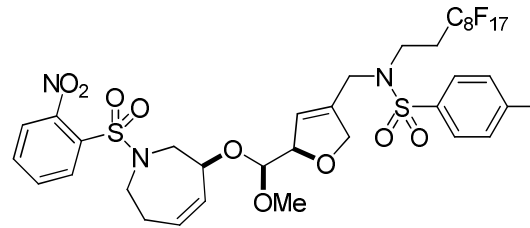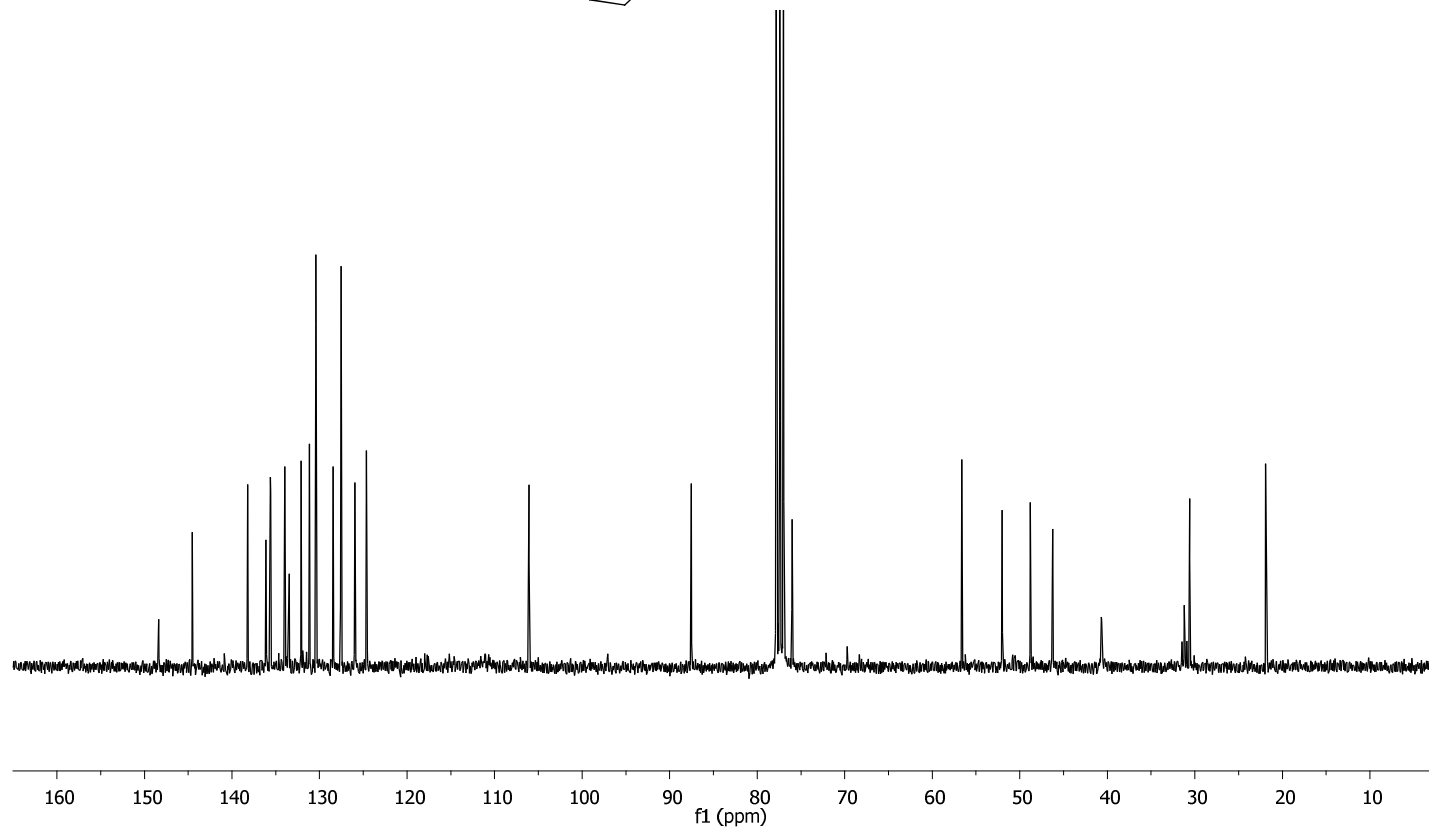

500 MHz  $^1\text{H}$  NMR of 27 (R = H)

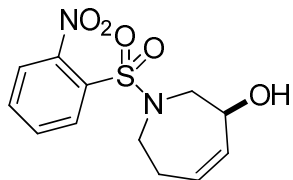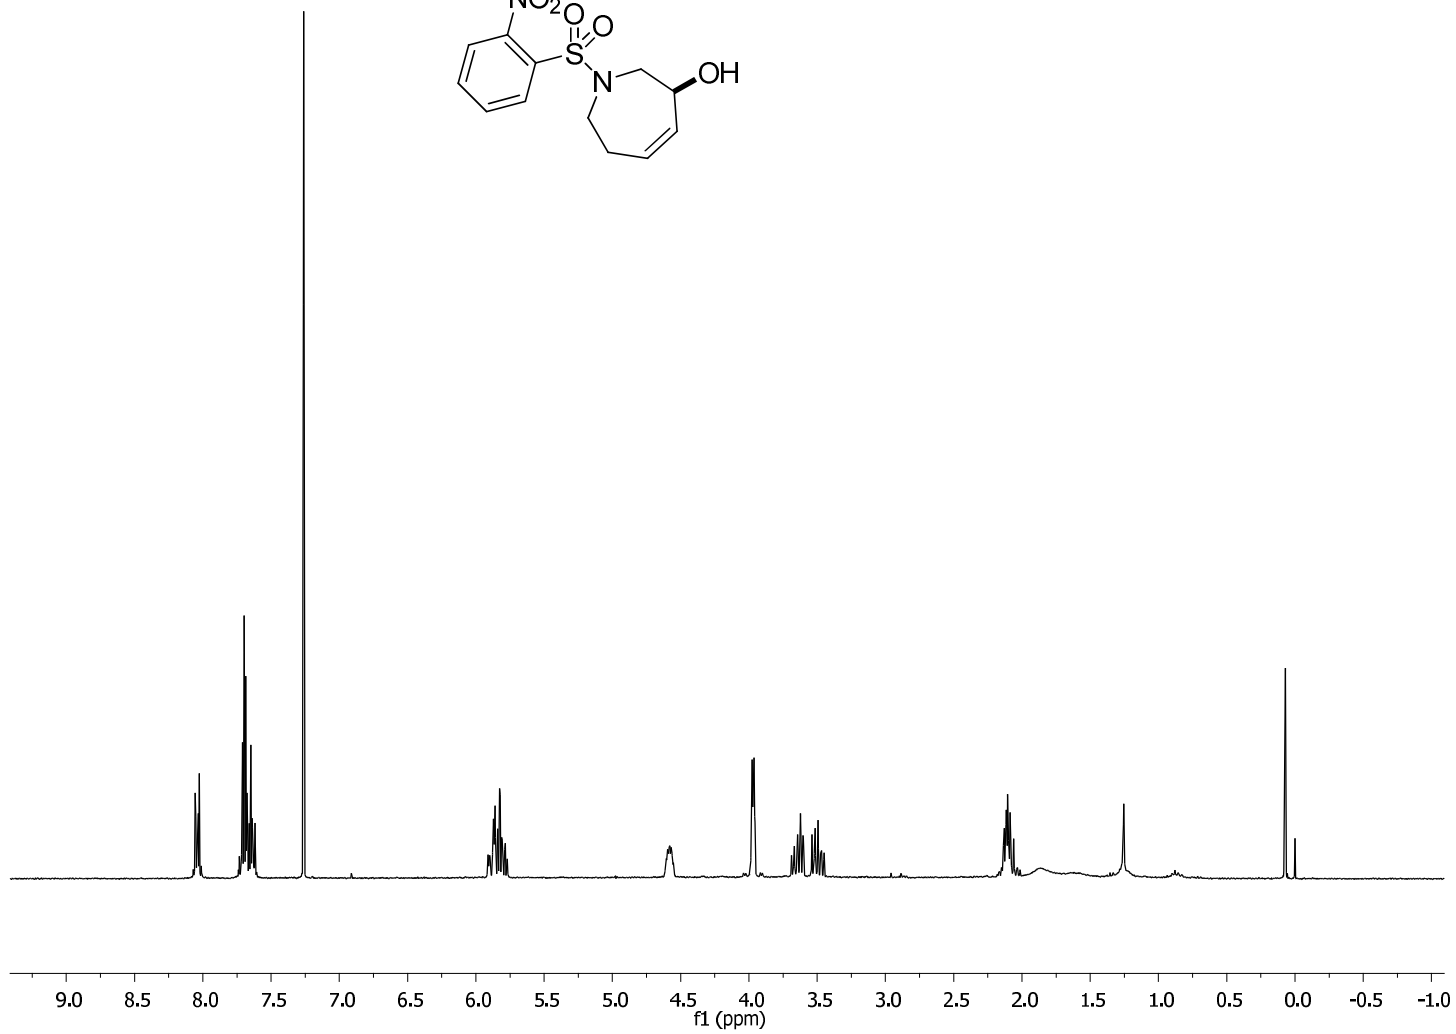



75 MHz  $^{13}\text{C}$  NMR of 27 (R = H)

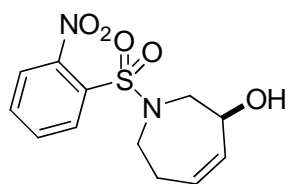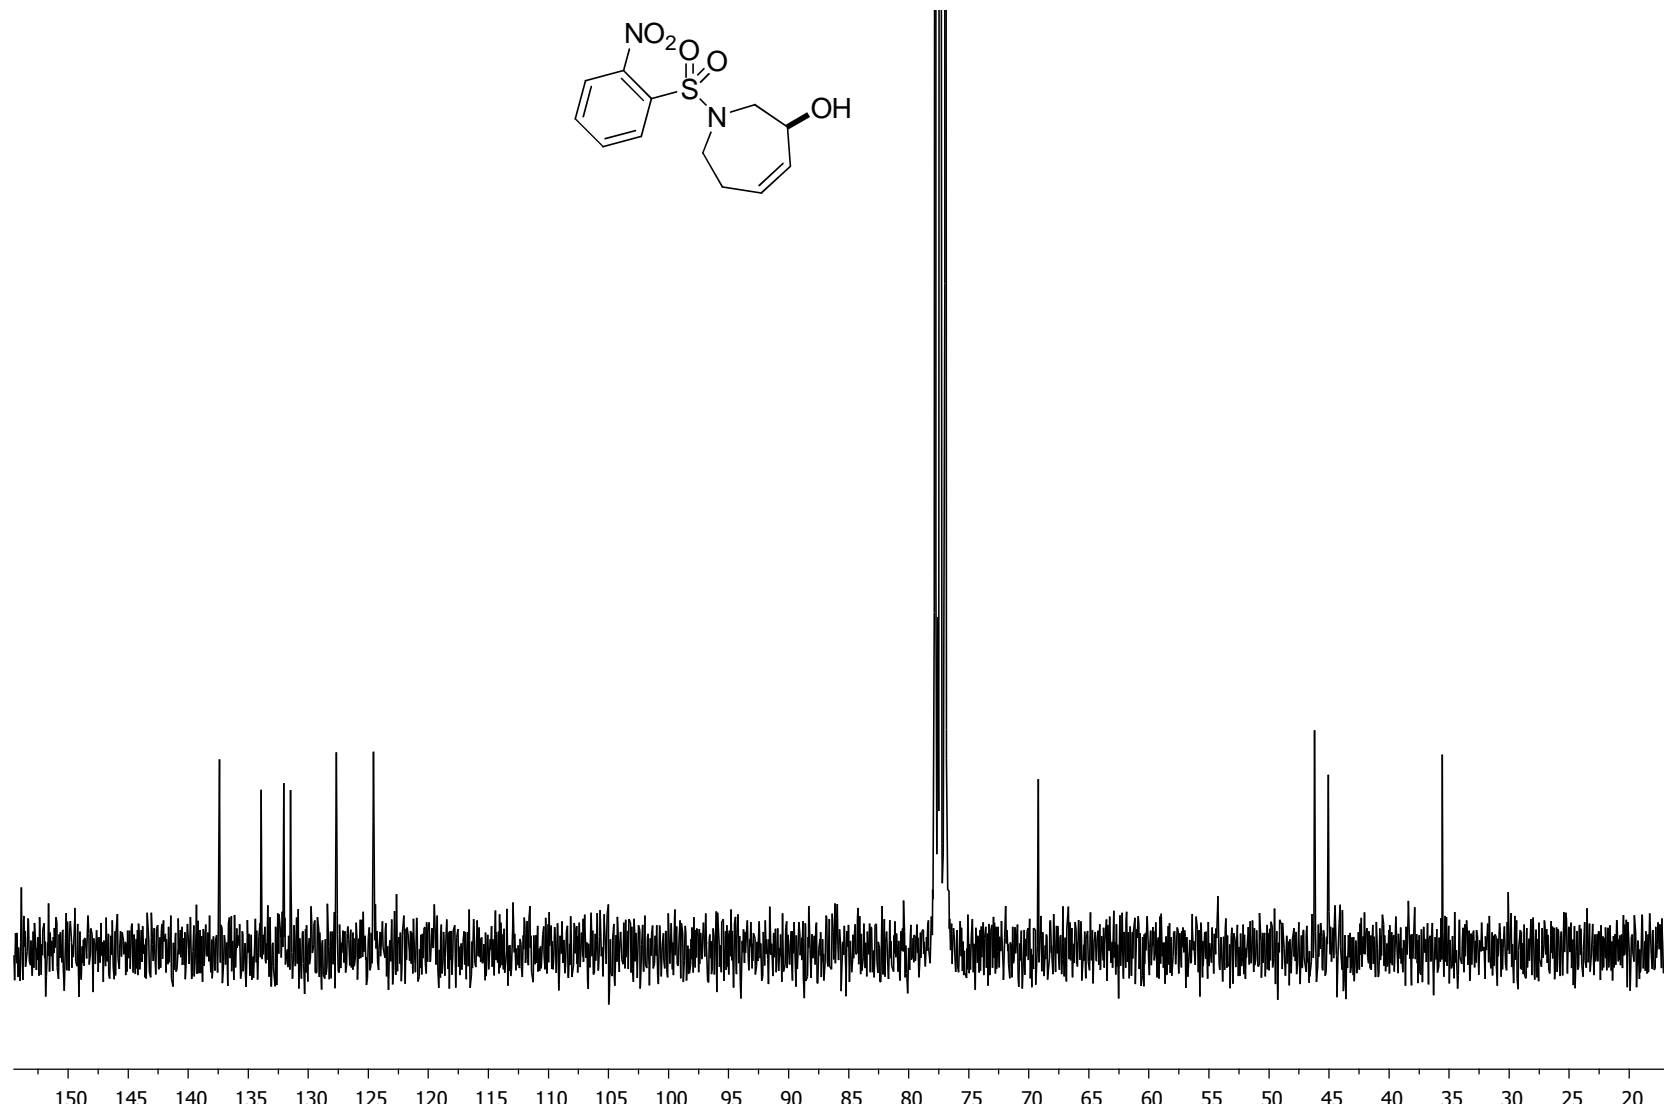

500 MHz  $^1\text{H}$  NMR of S9

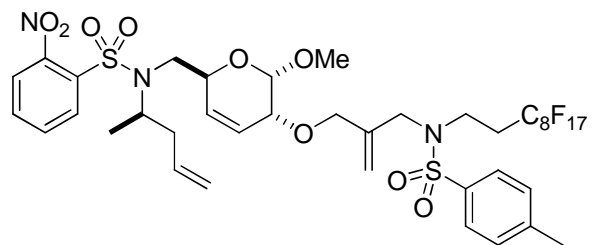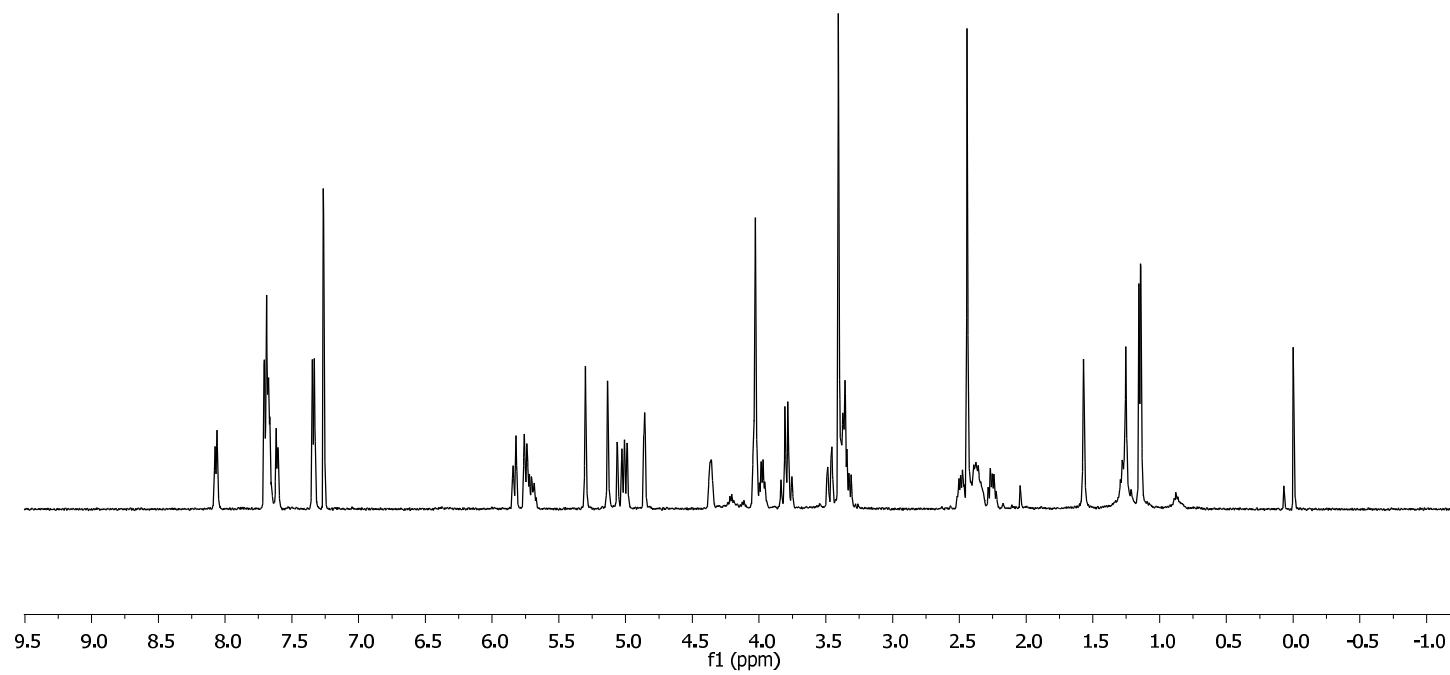

75 MHz  $^{13}\text{C}$  NMR of S9

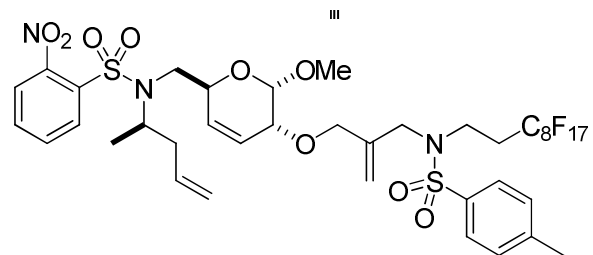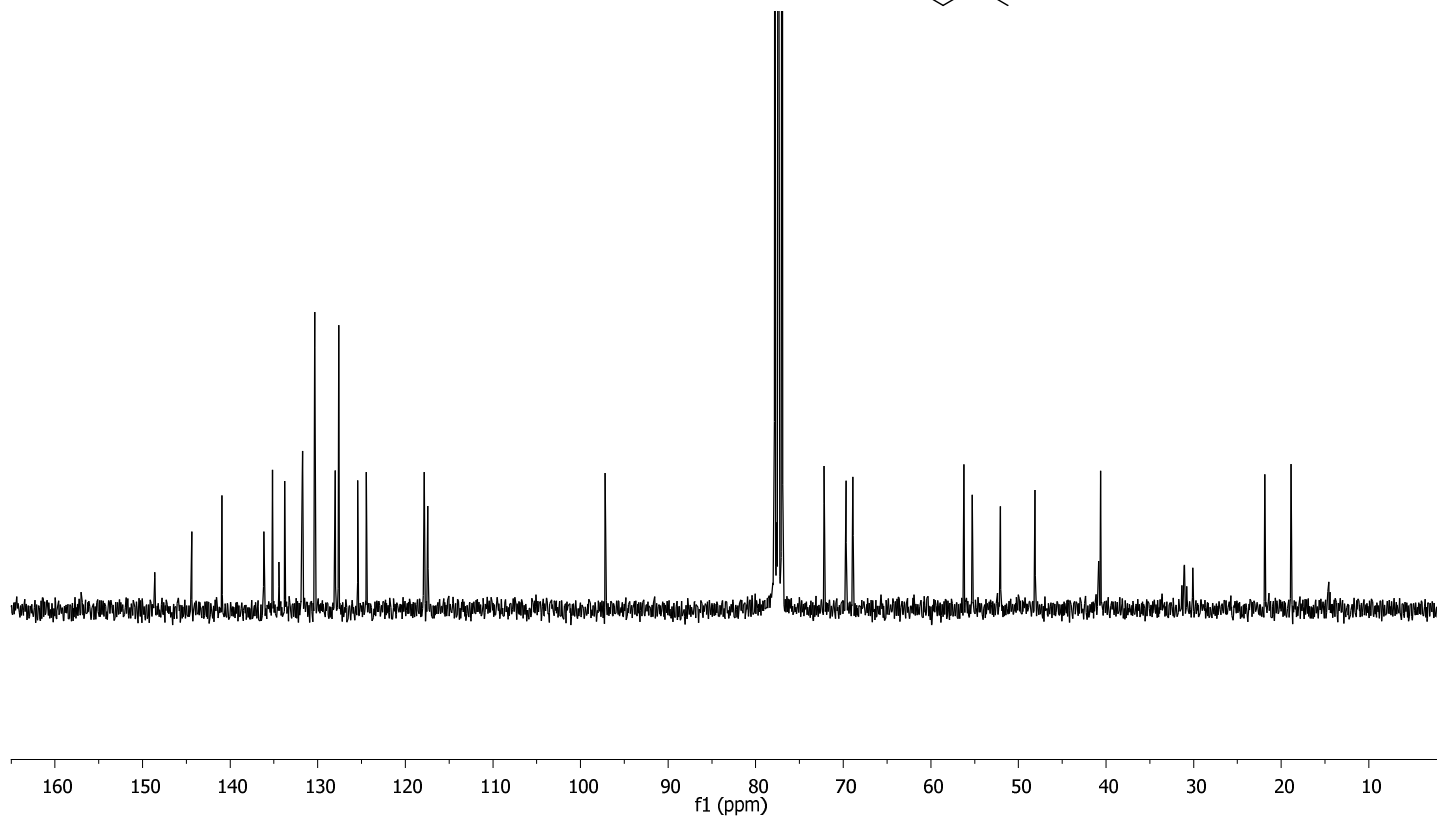

500 MHz  $^1\text{H}$  NMR of 28 ( $\text{R} = \text{R}'^{\text{F}}$ )

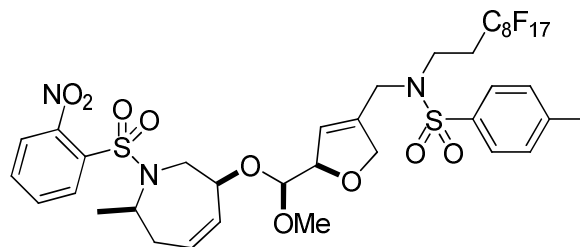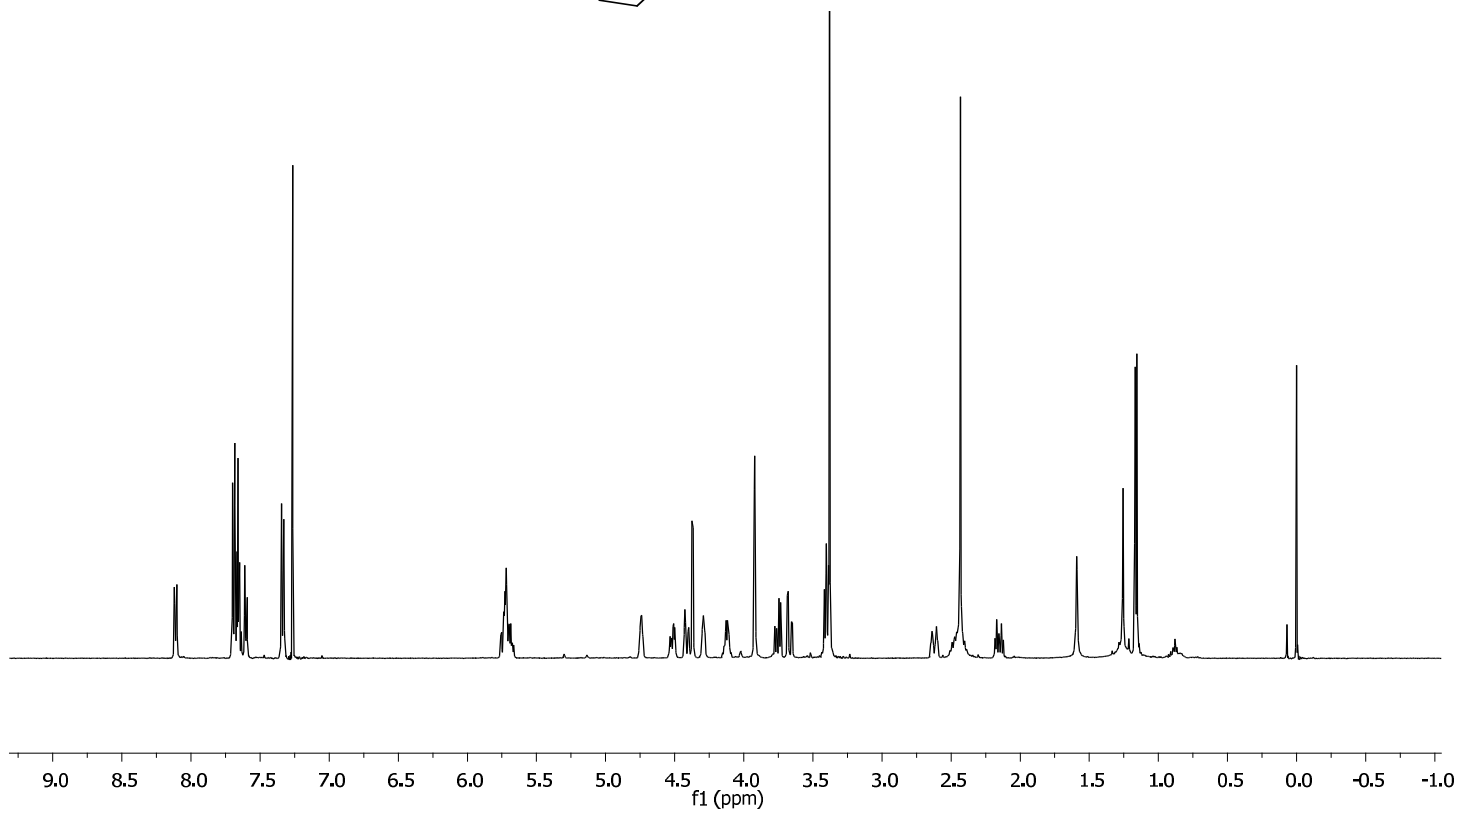

75 MHz  $^{13}\text{C}$  NMR of 28 ( $\text{R} = \text{R}'^{\text{F}}$ )

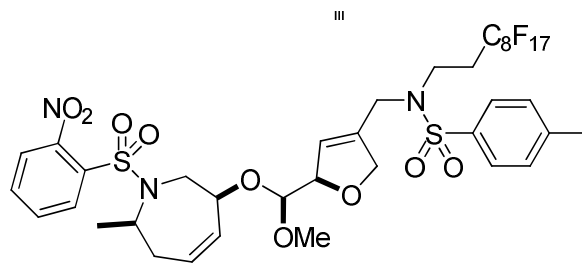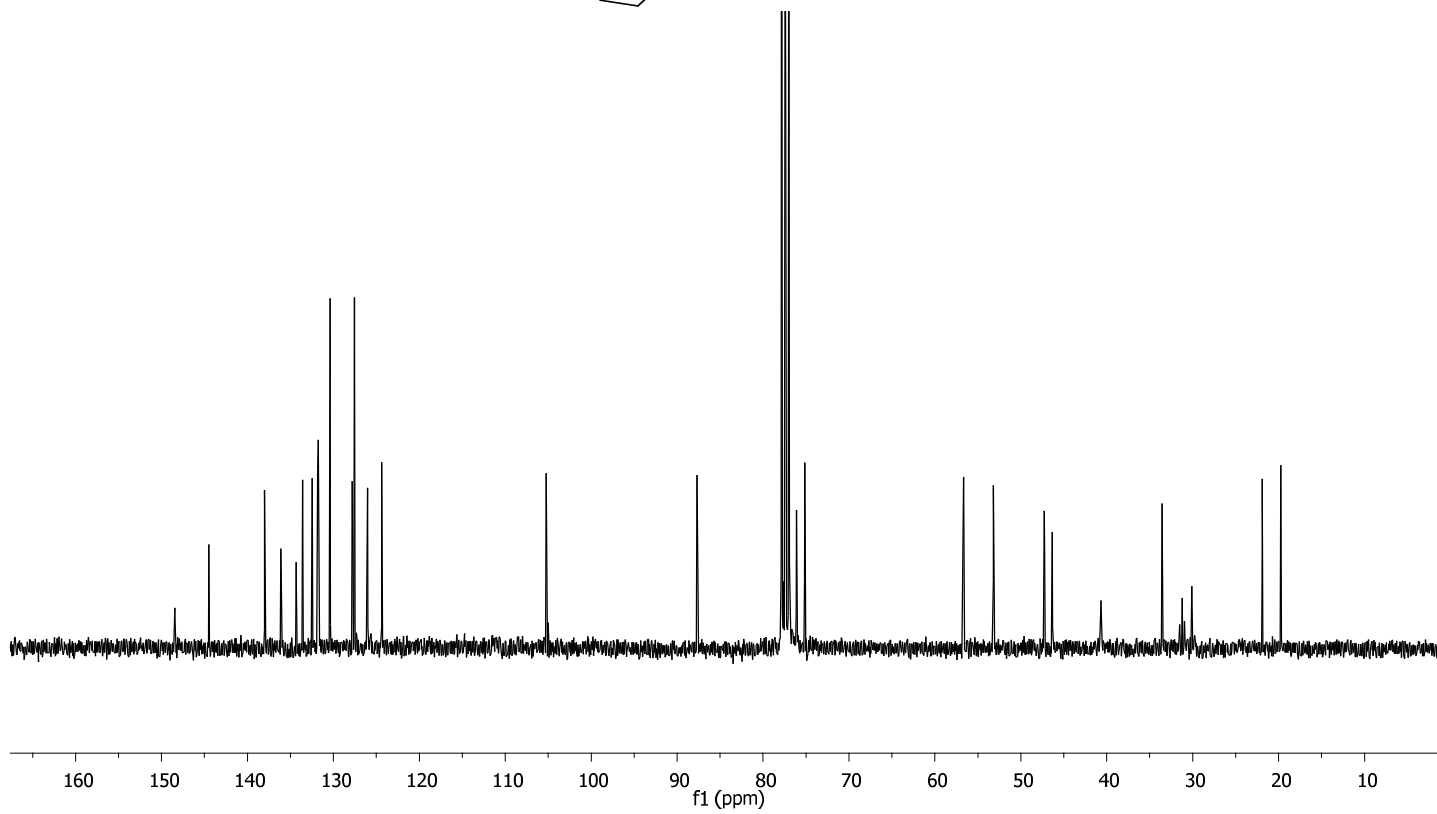

500 MHz  $^1\text{H}$  NMR of 28 (R = H)

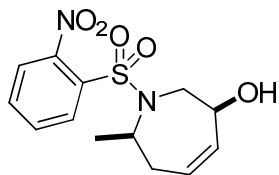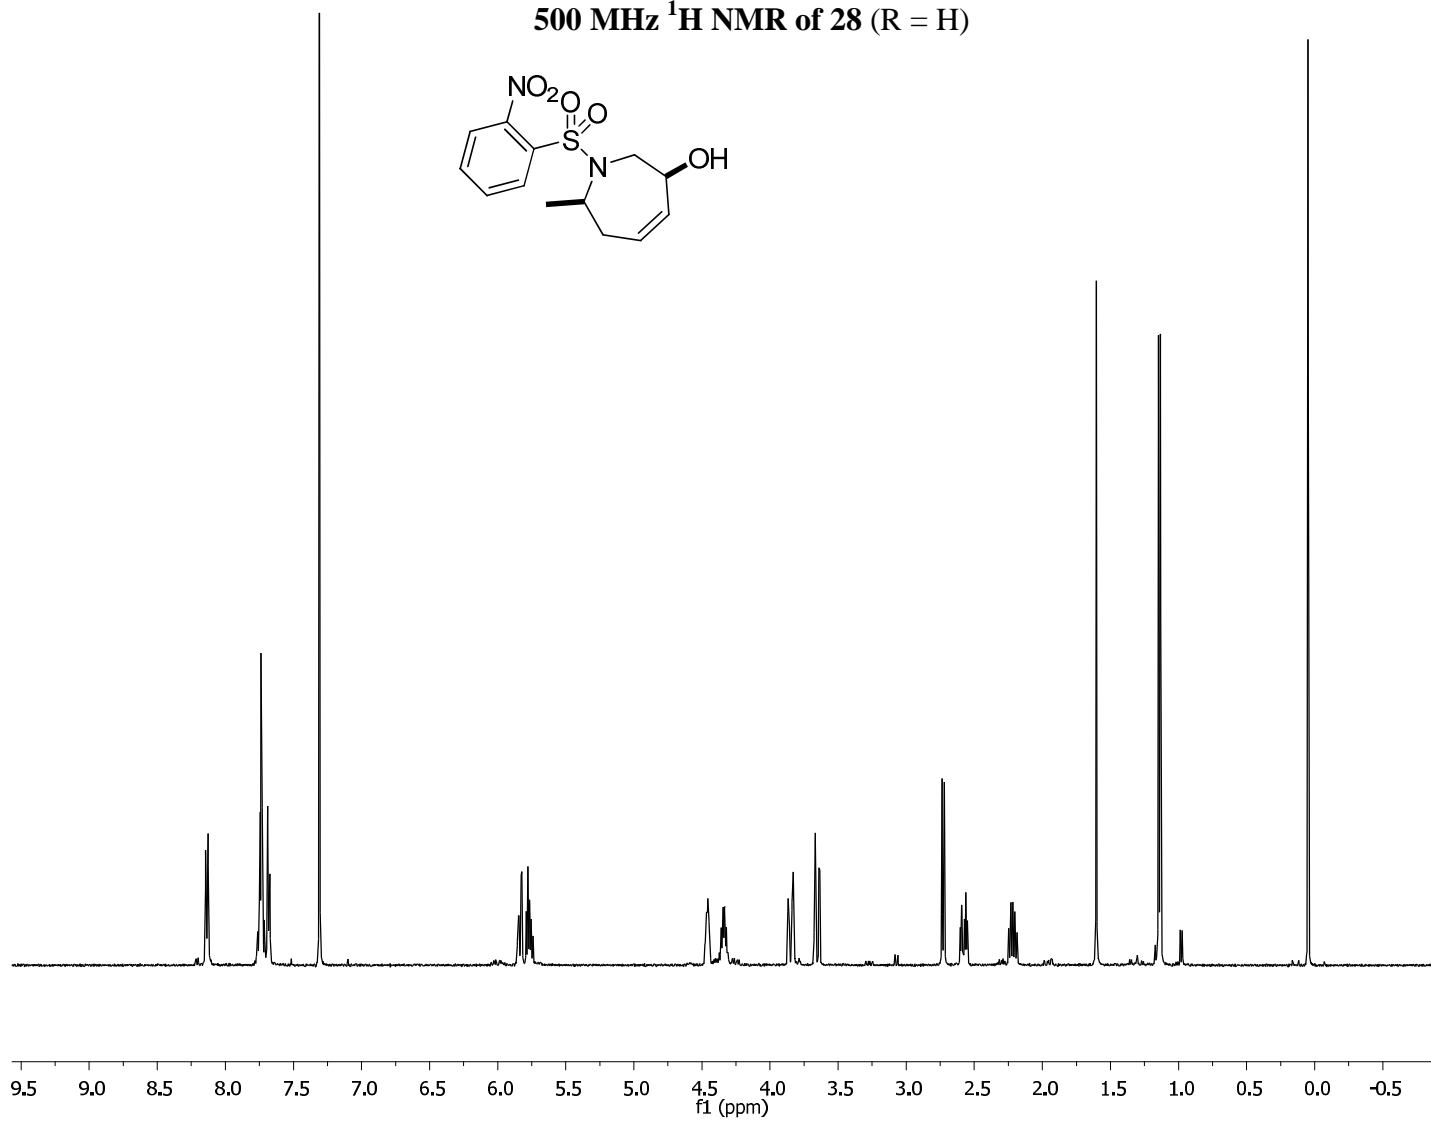

75 MHz  $^{13}\text{C}$  NMR of 28 (R = H)

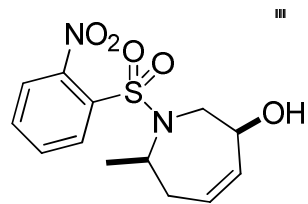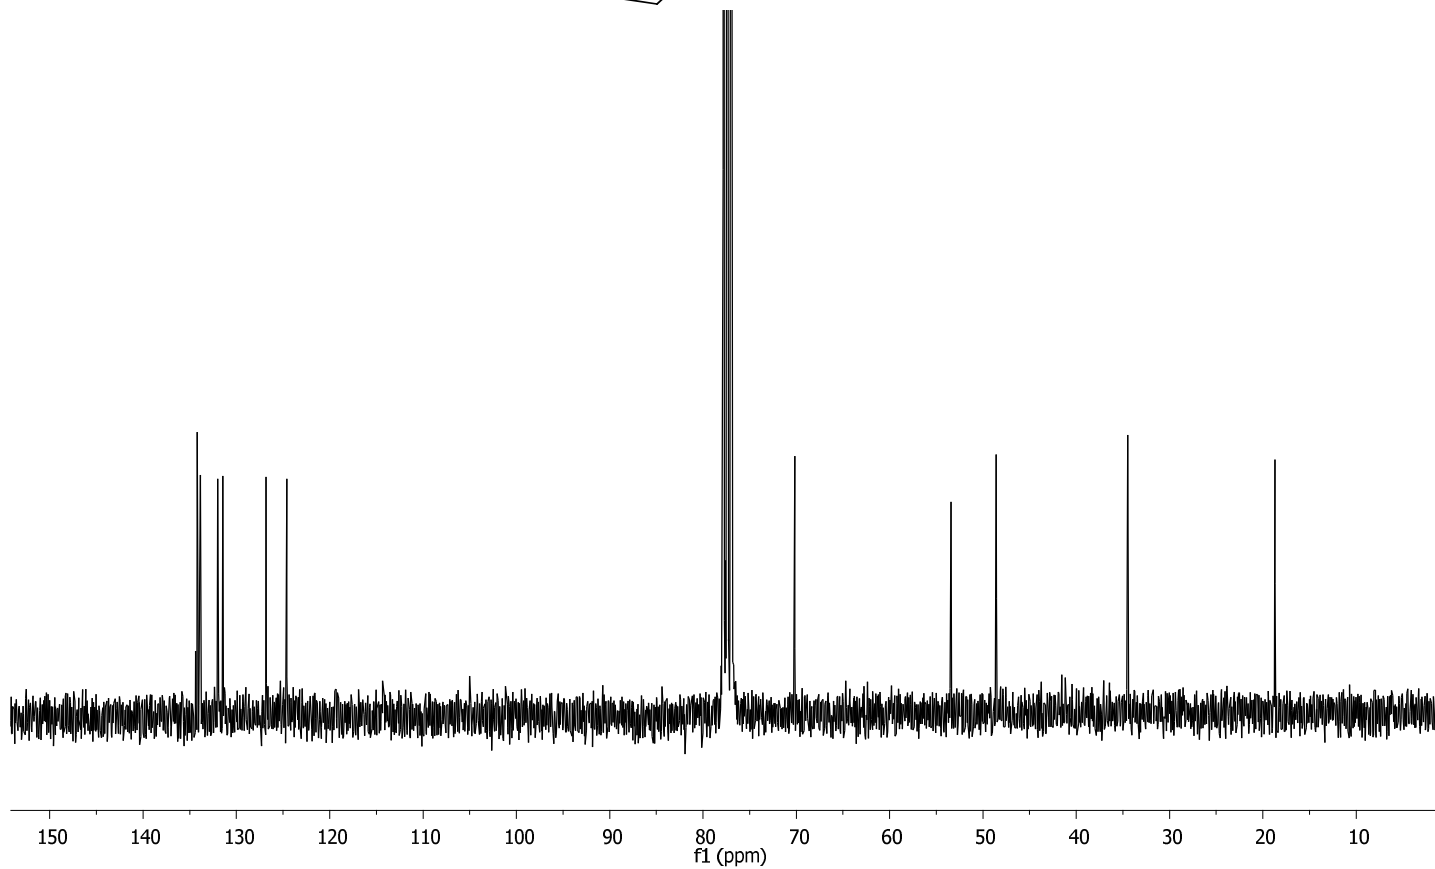

500 MHz <sup>1</sup>H NMR of S10 (F-SPE purified only)

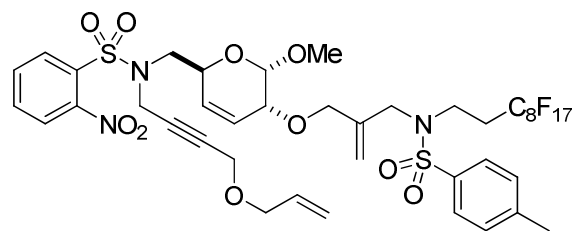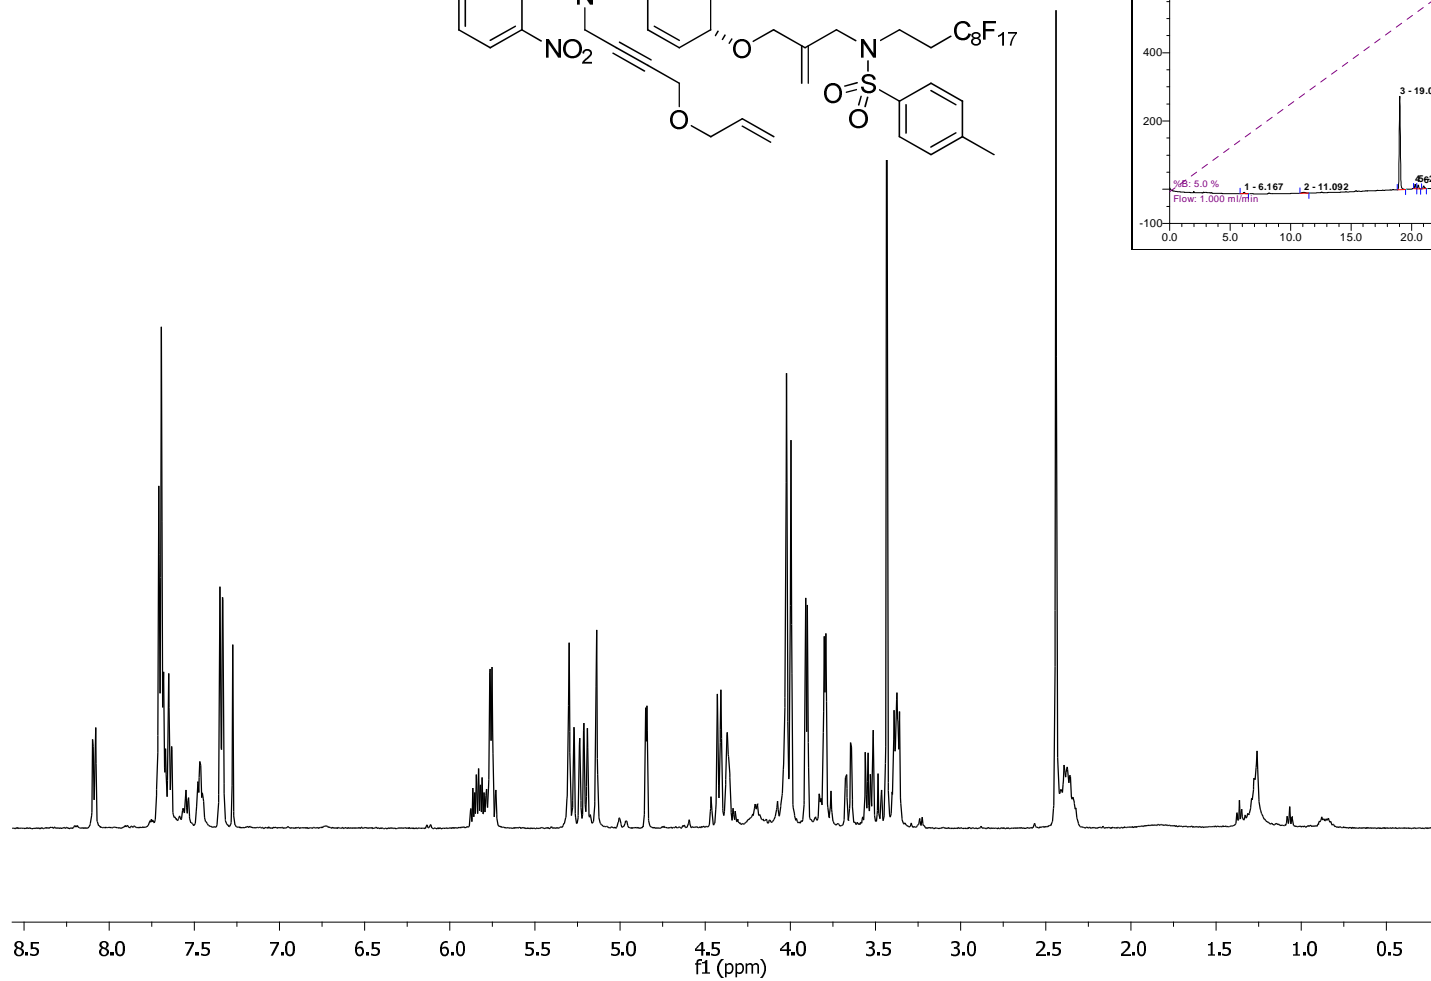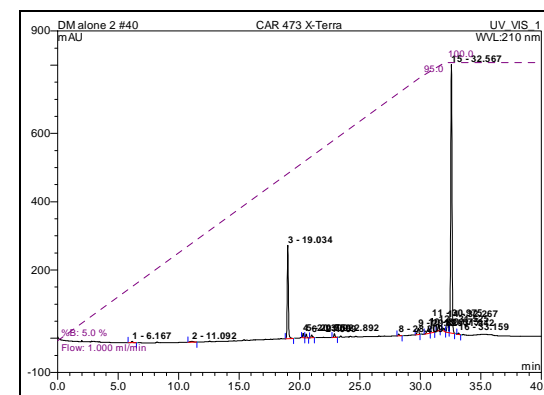



75 MHz  $^{13}\text{C}$  NMR of S10

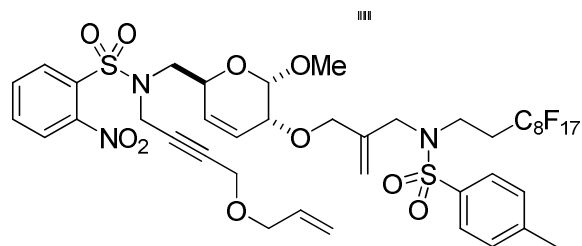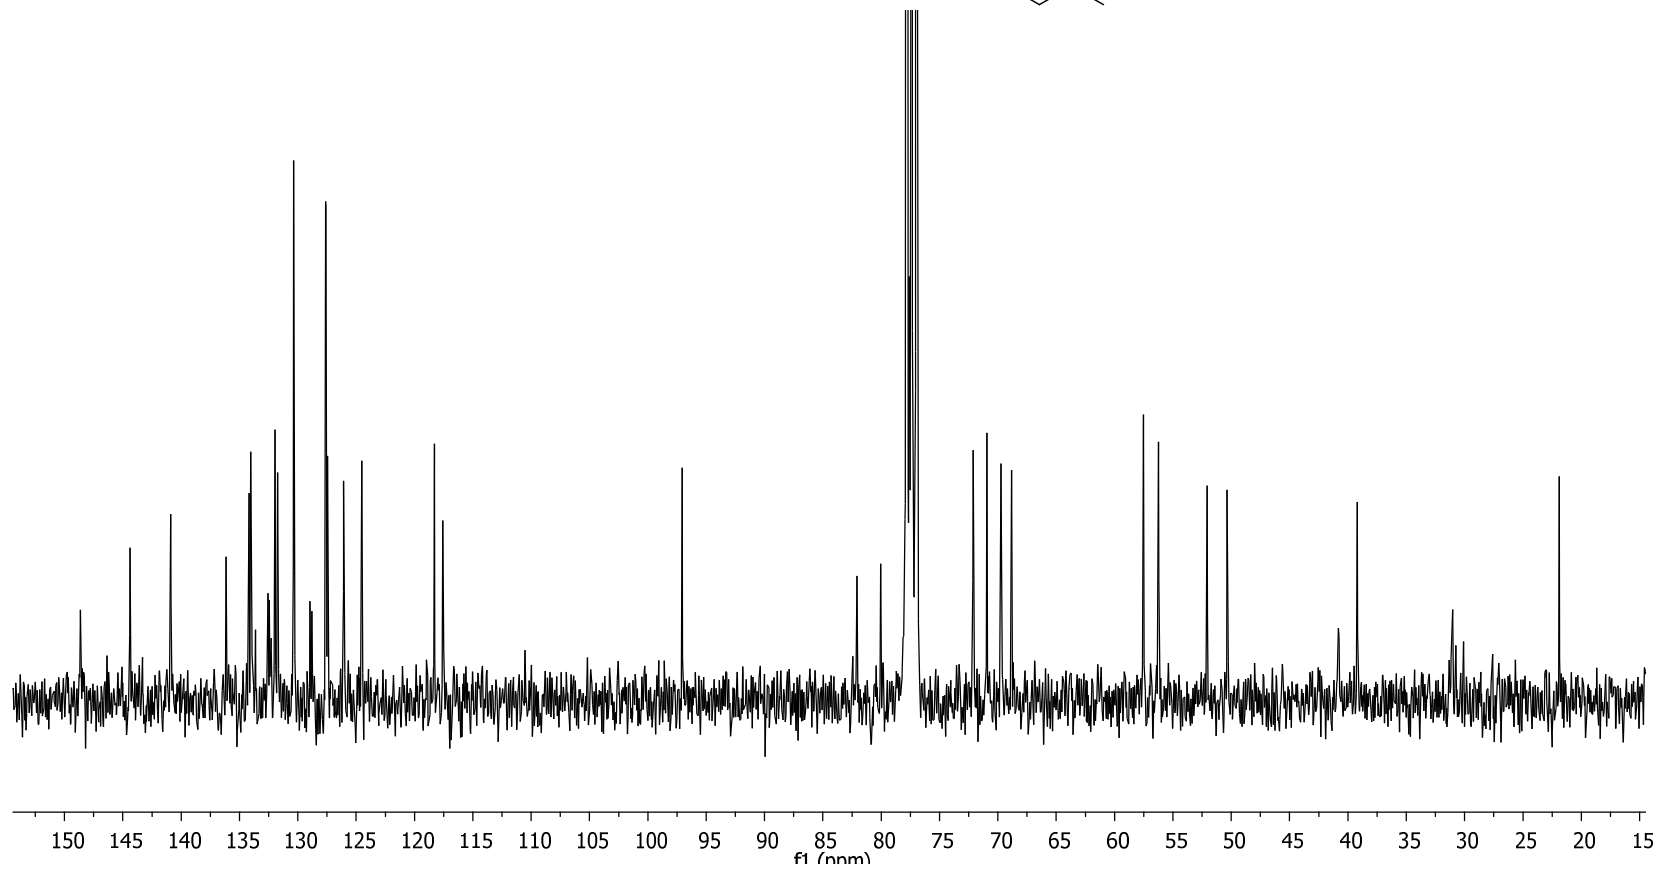

500 MHz  $^1\text{H}$  NMR of 29 ( $\text{R} = \text{R}'^{\text{F}}$ )

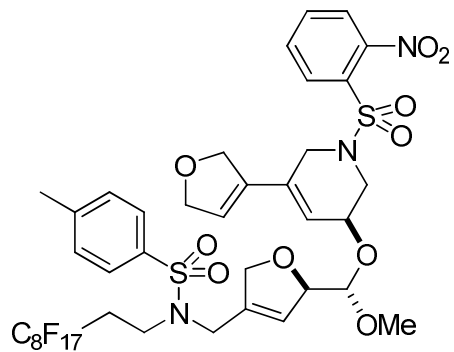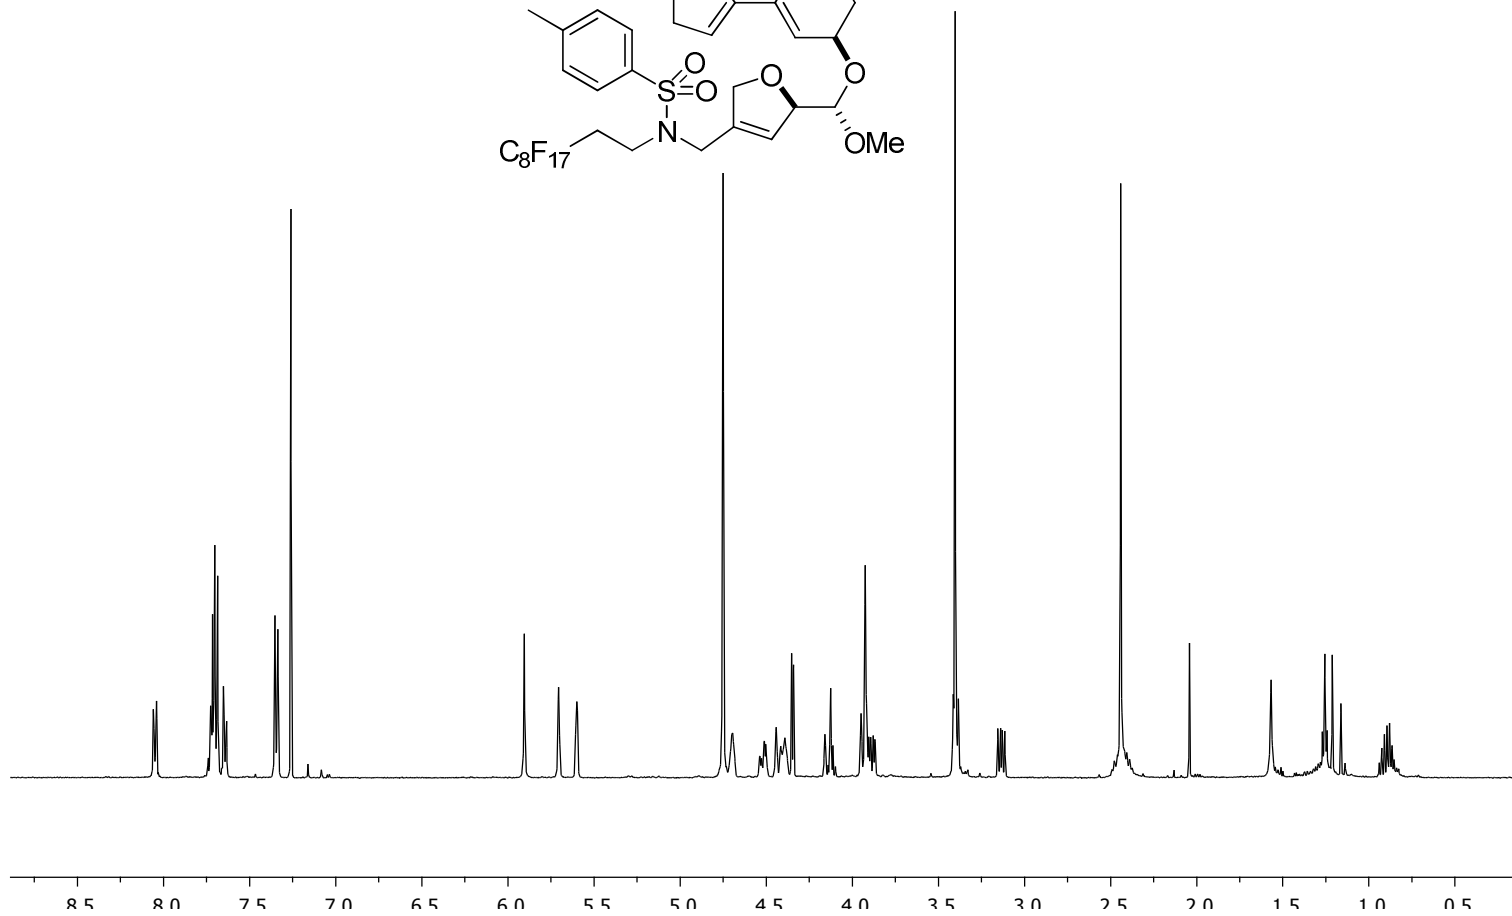

75 MHz  $^{13}\text{C}$  NMR of 29 ( $\text{R} = \text{R}'^{\text{F}}$ )

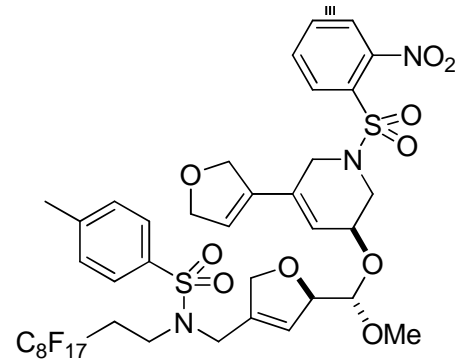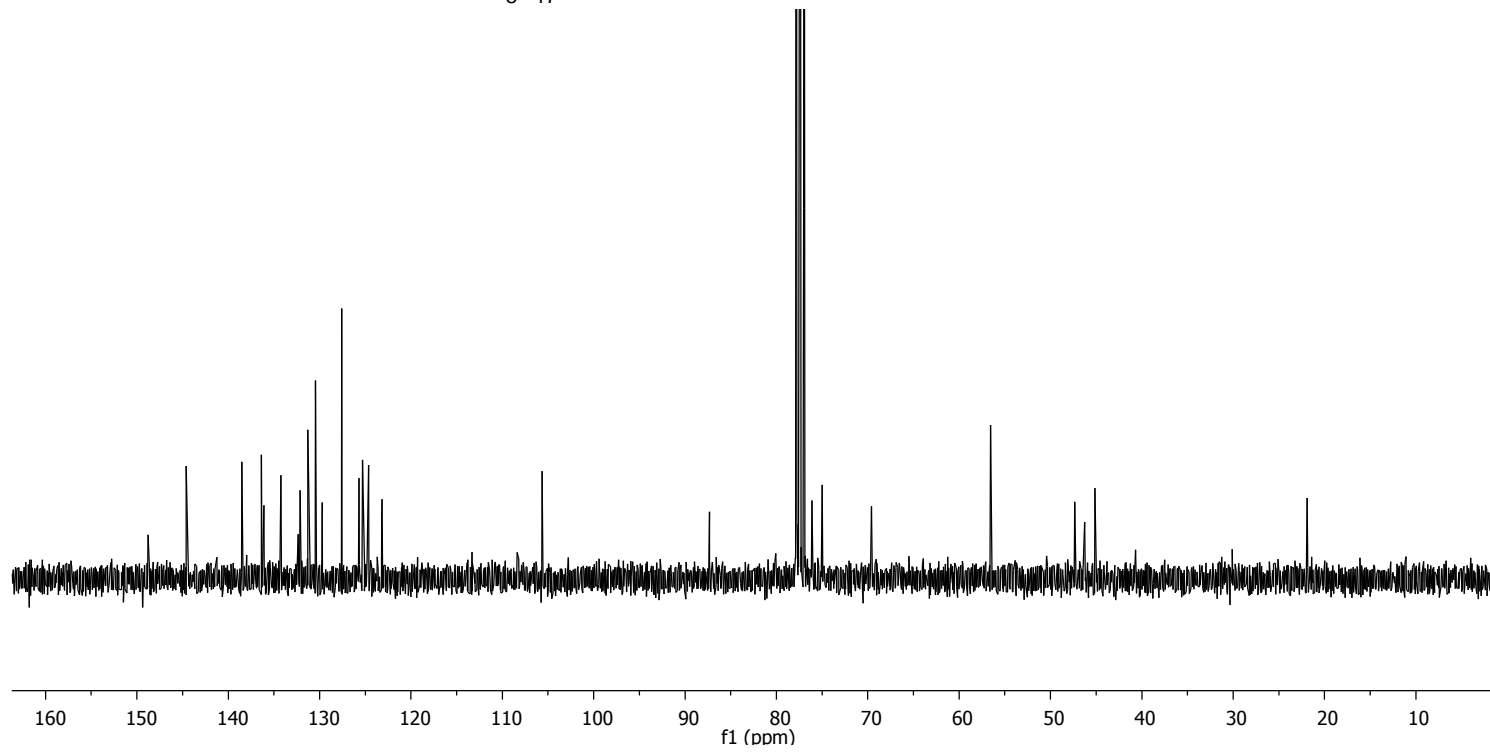

500 MHz  $^1\text{H}$  NMR of 29 (R = H)

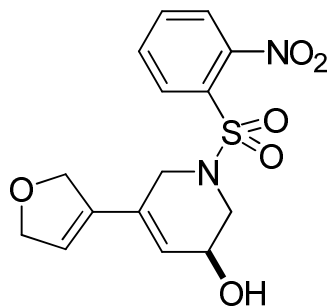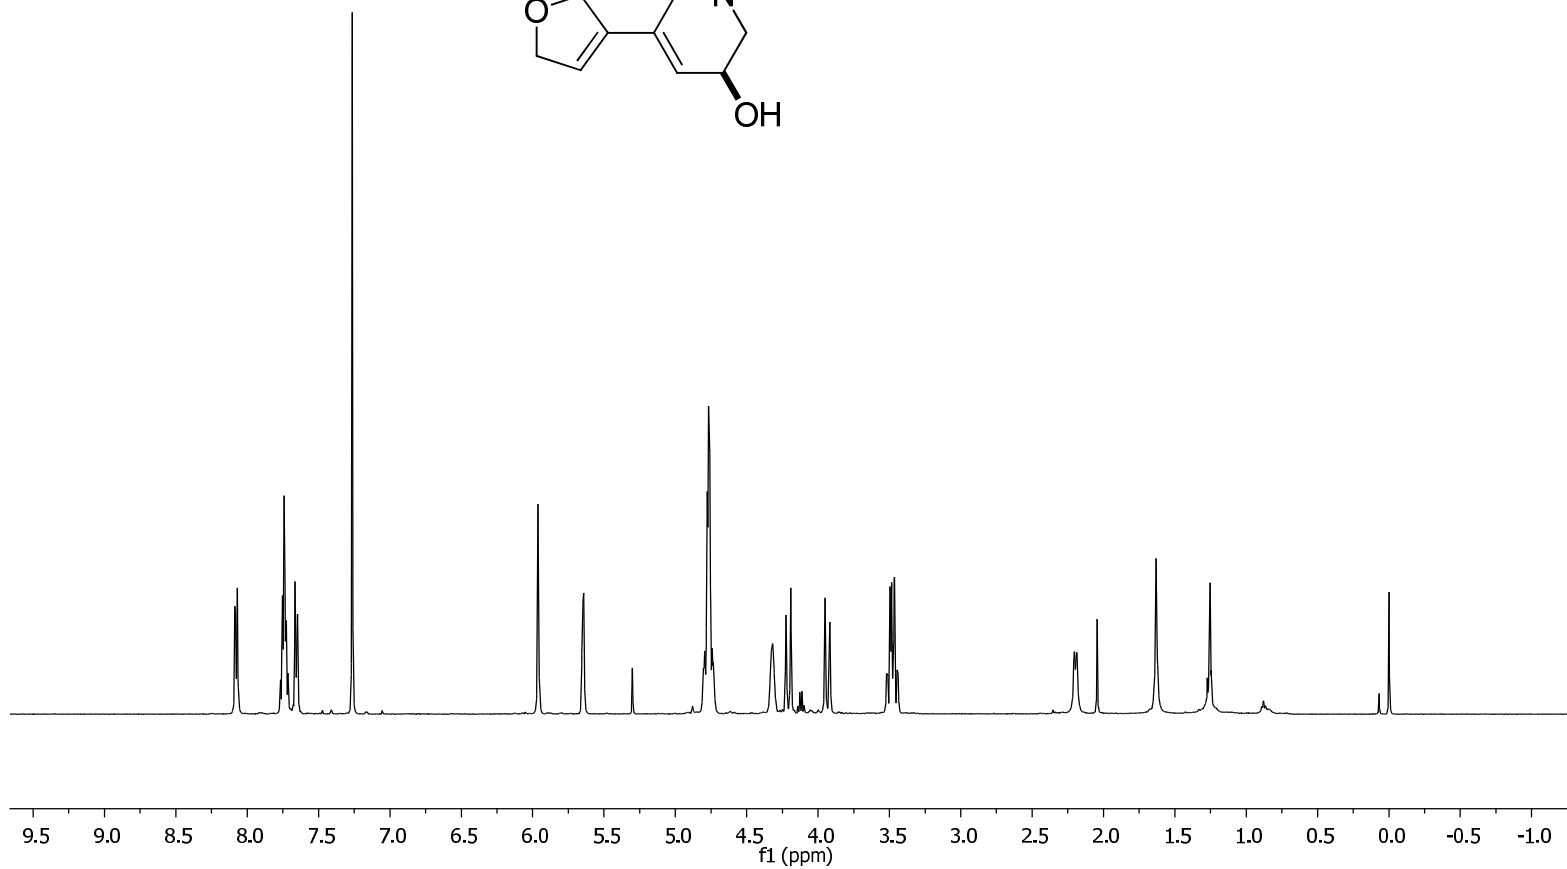

75 MHz  $^{13}\text{C}$  NMR of 29 (R = H)

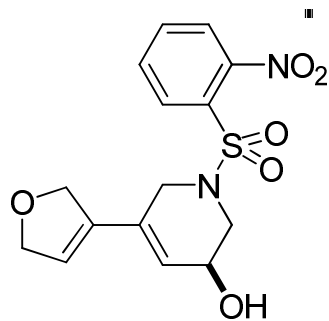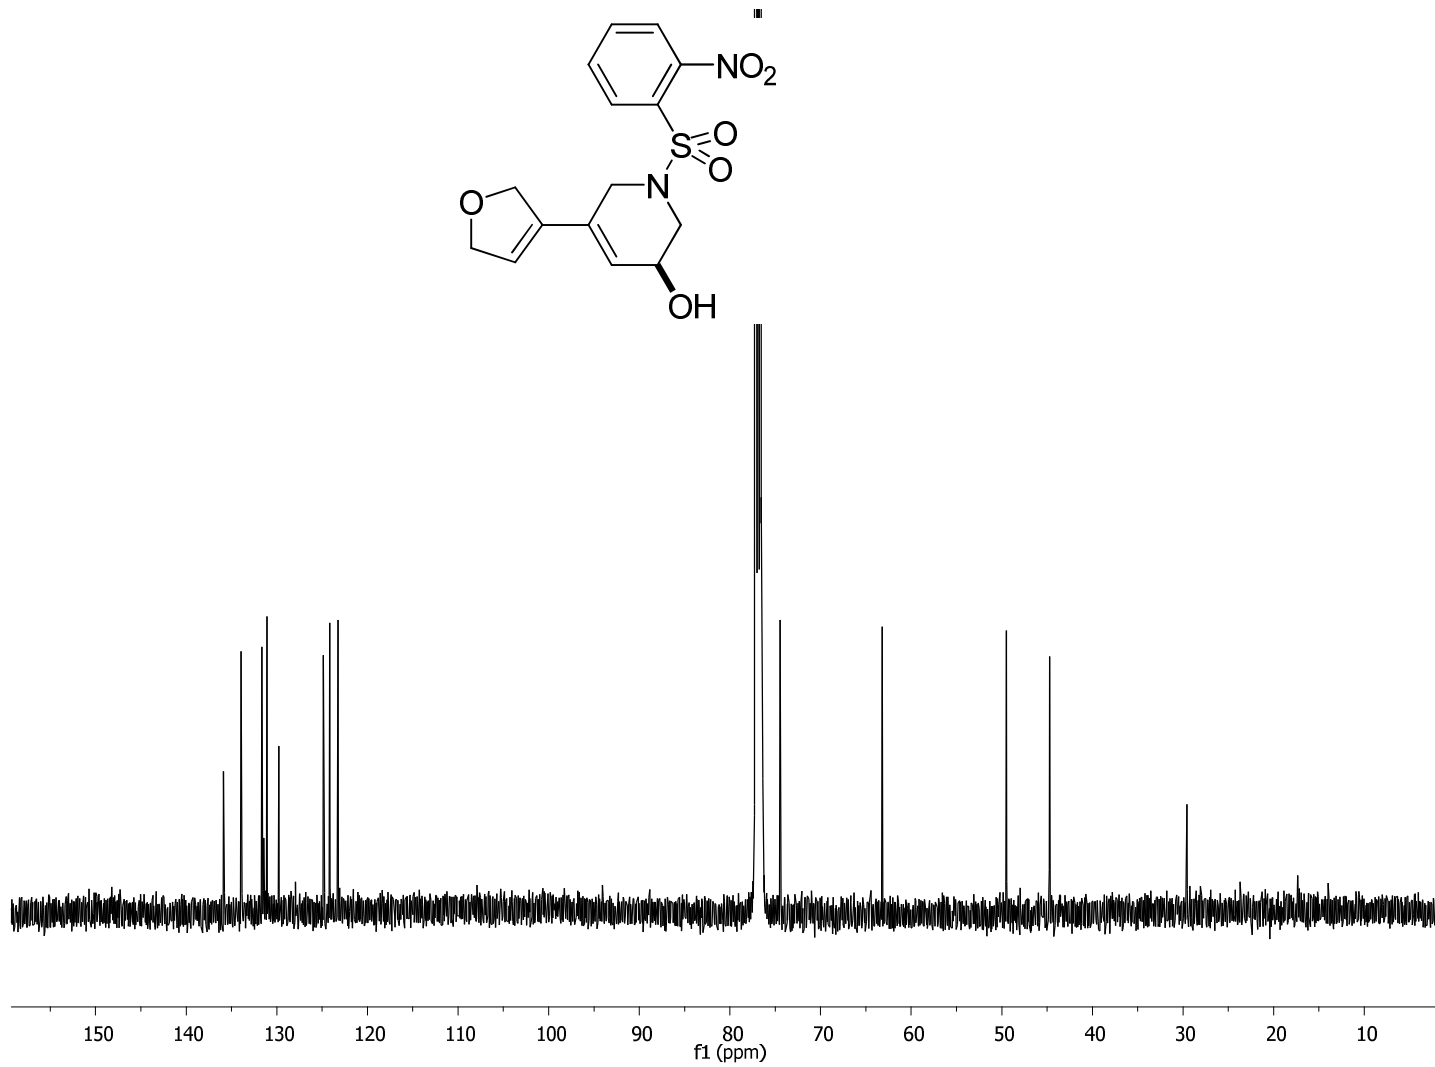

500 MHz  $^1\text{H}$  NMR of S11 (F-SPE purified only)

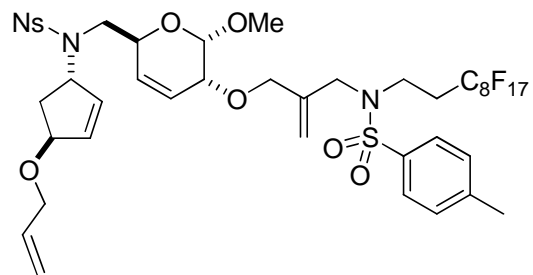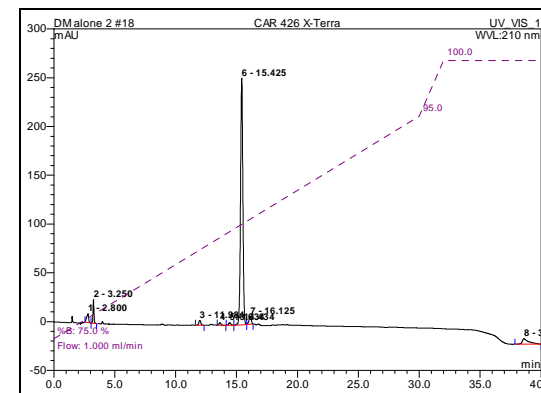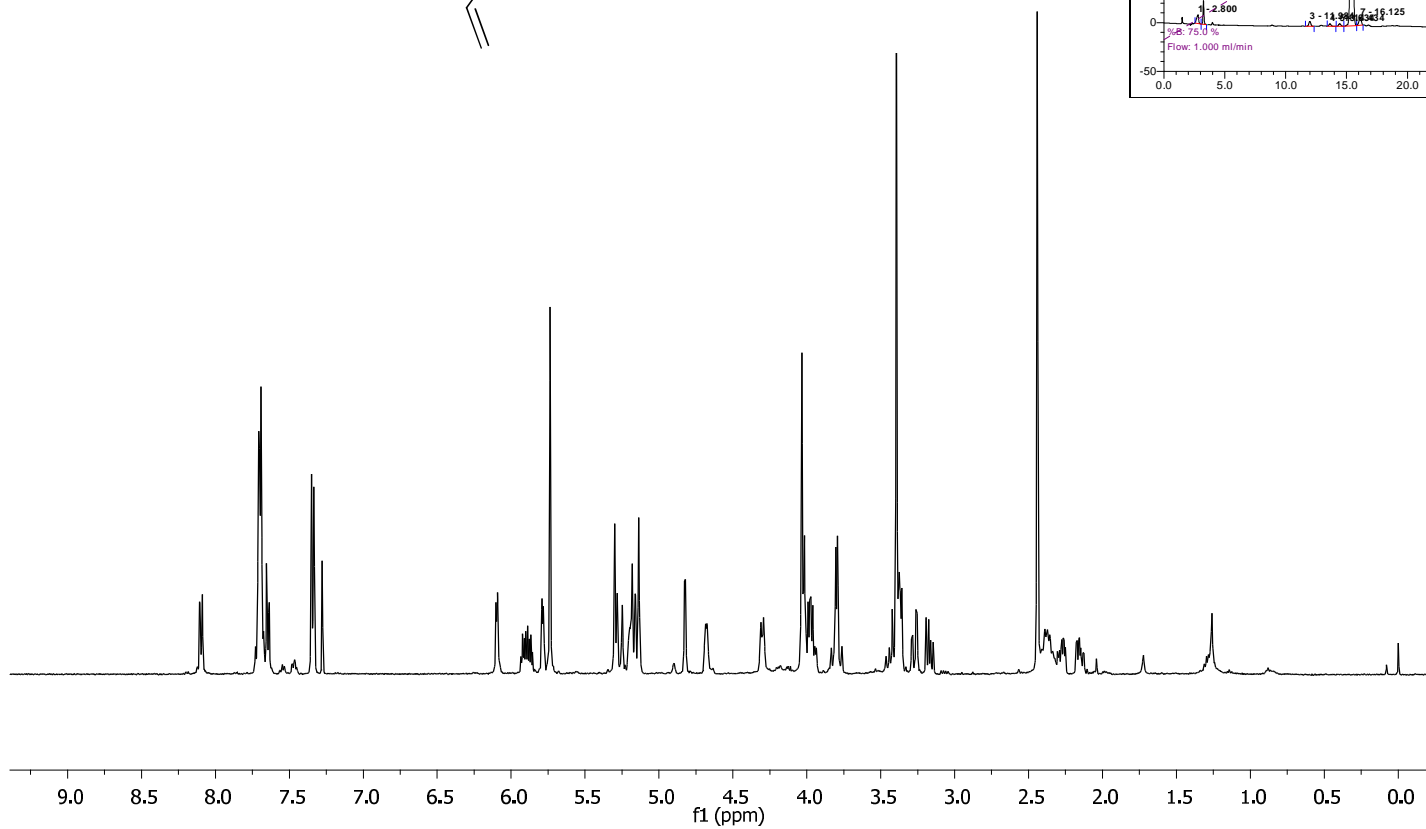

75 MHz  $^{13}\text{C}$  NMR of S11

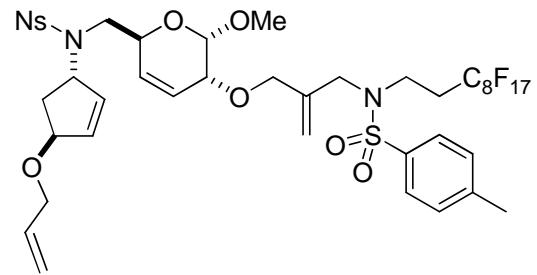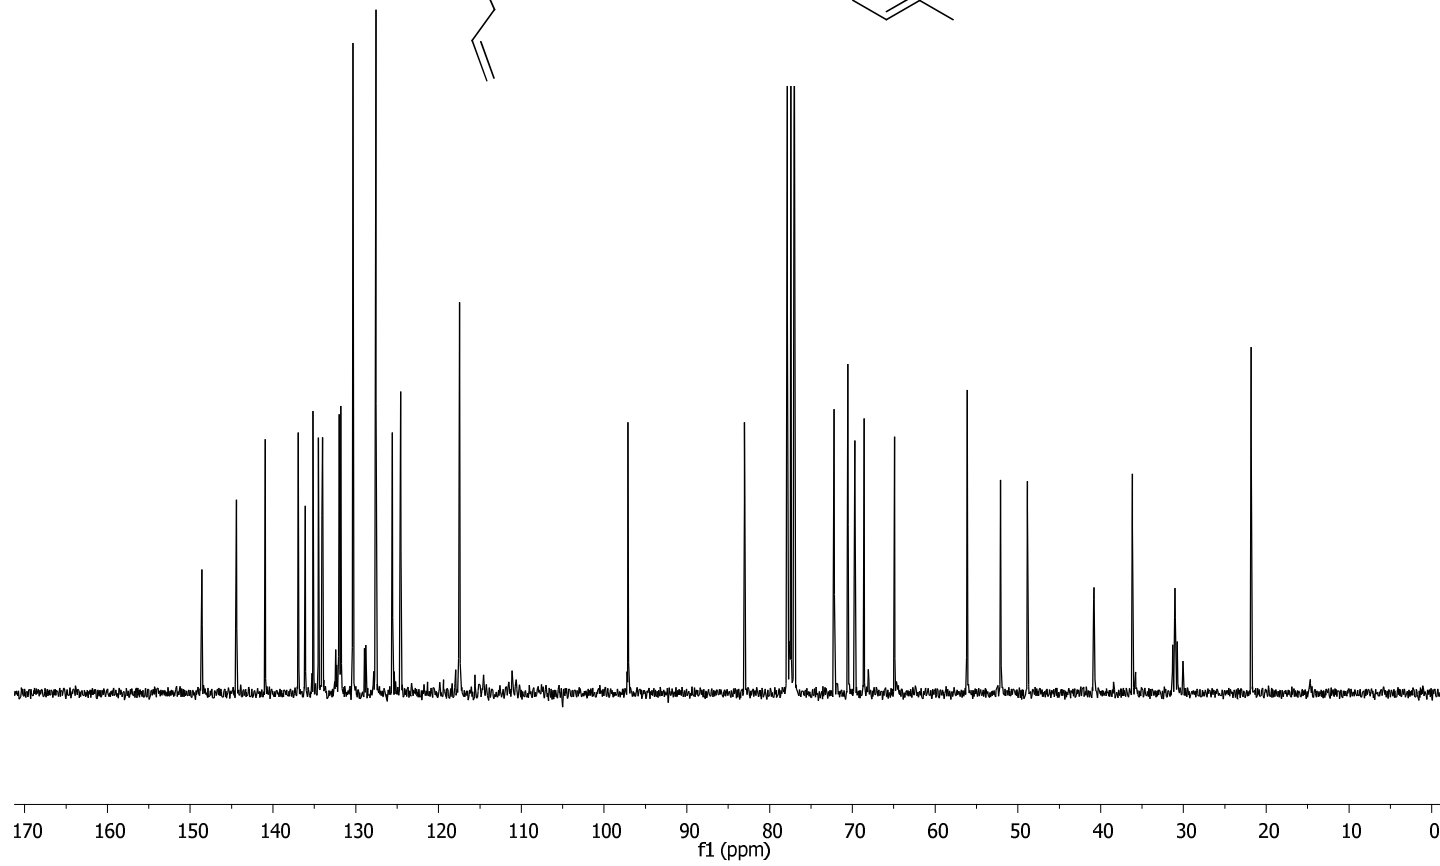

**$^1\text{H}$  NMR of 30 (R = R'<sup>F</sup>) (F-SPE purified only)**

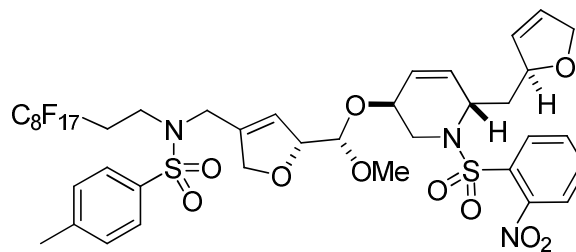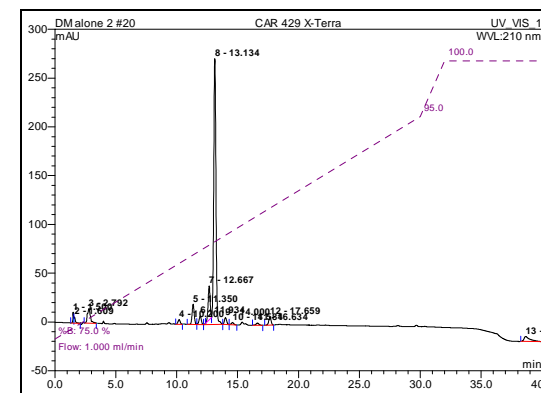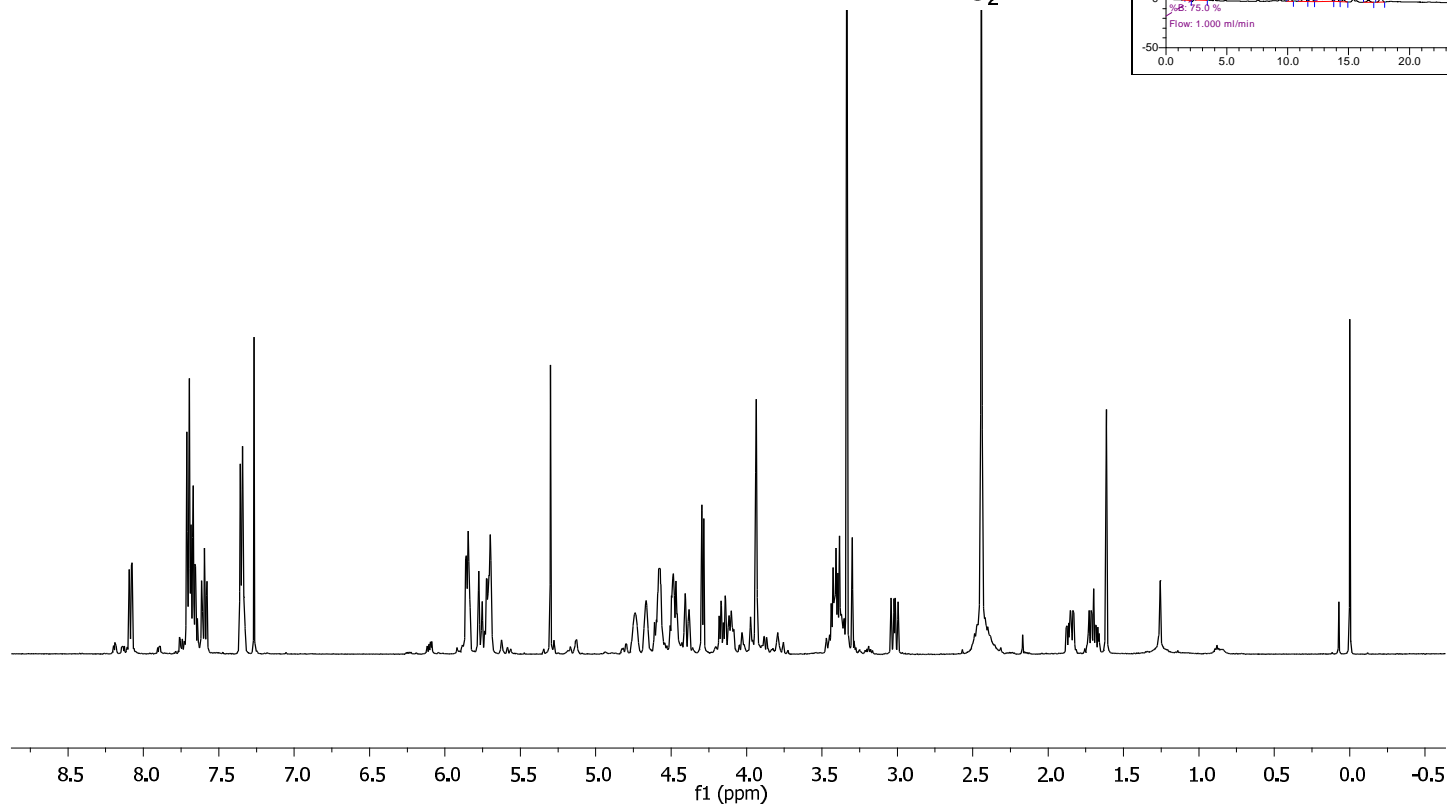



75 MHz  $^{13}\text{C}$  NMR of 30 ( $\text{R} = \text{R}'^{\text{F}}$ )

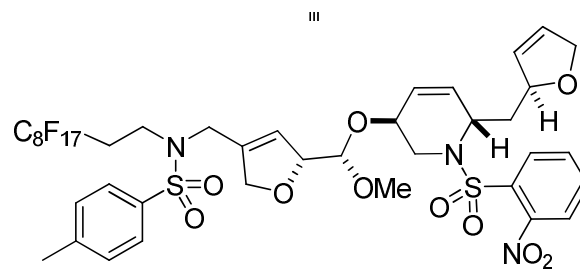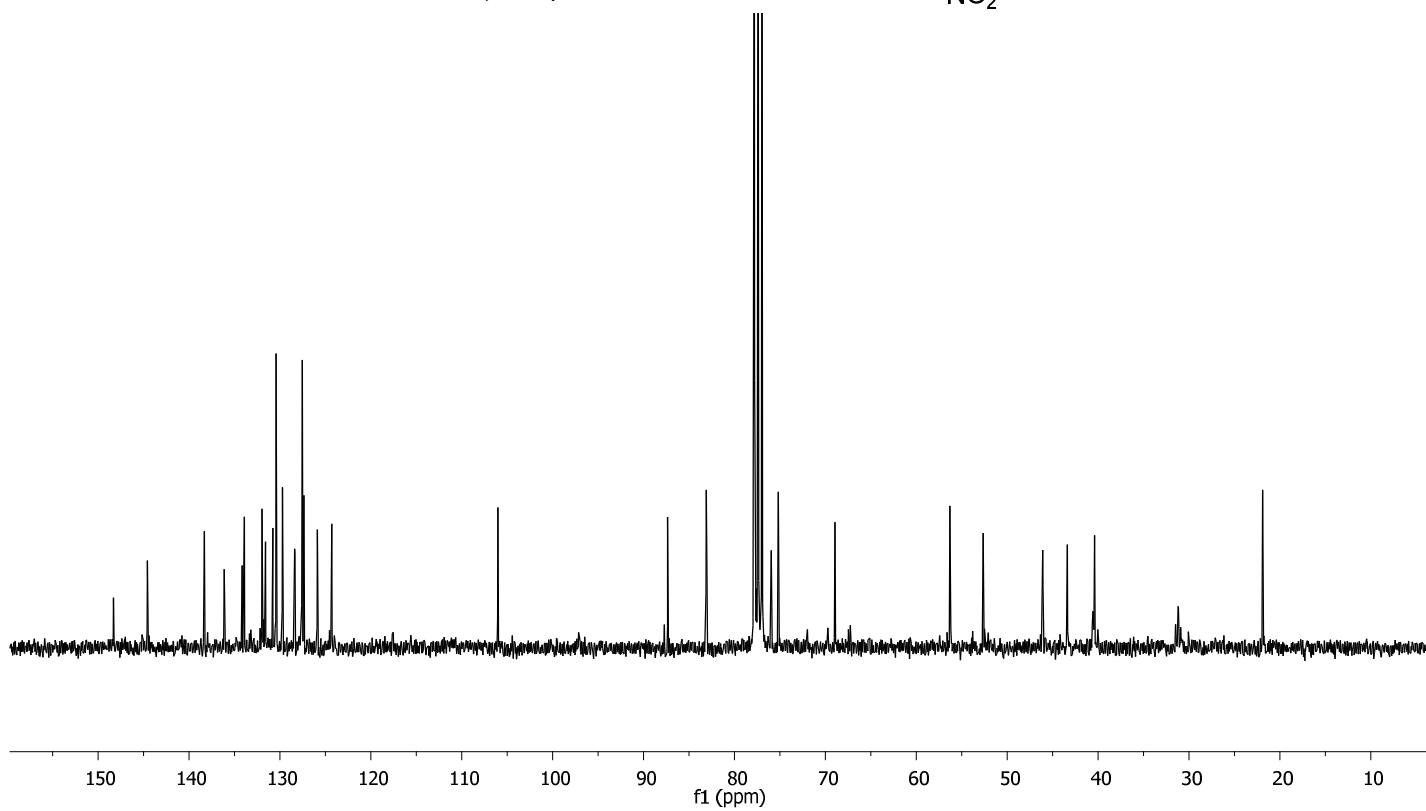

500 MHz  $^1\text{H}$  NMR of 30 (R = H)

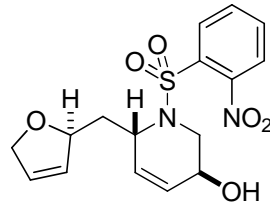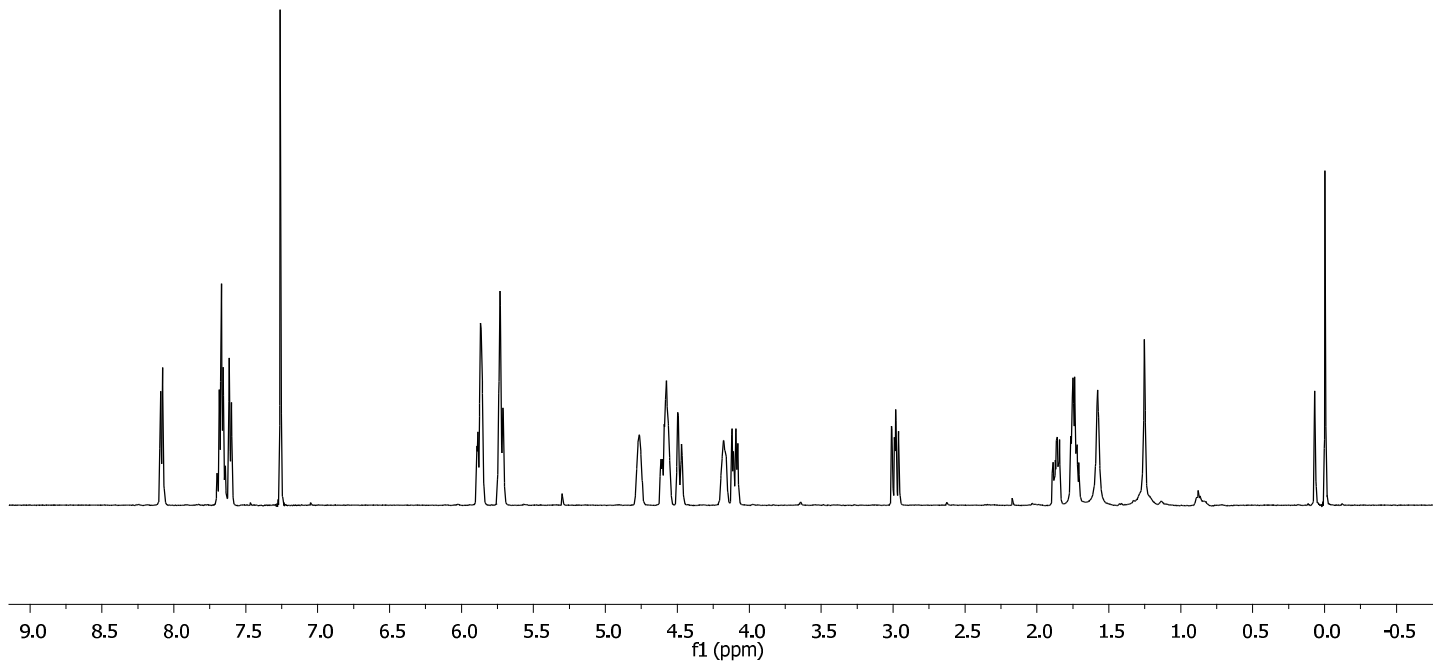

75 MHz  $^{13}\text{C}$  NMR of 30 (R = H)

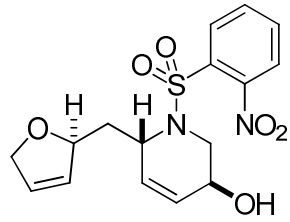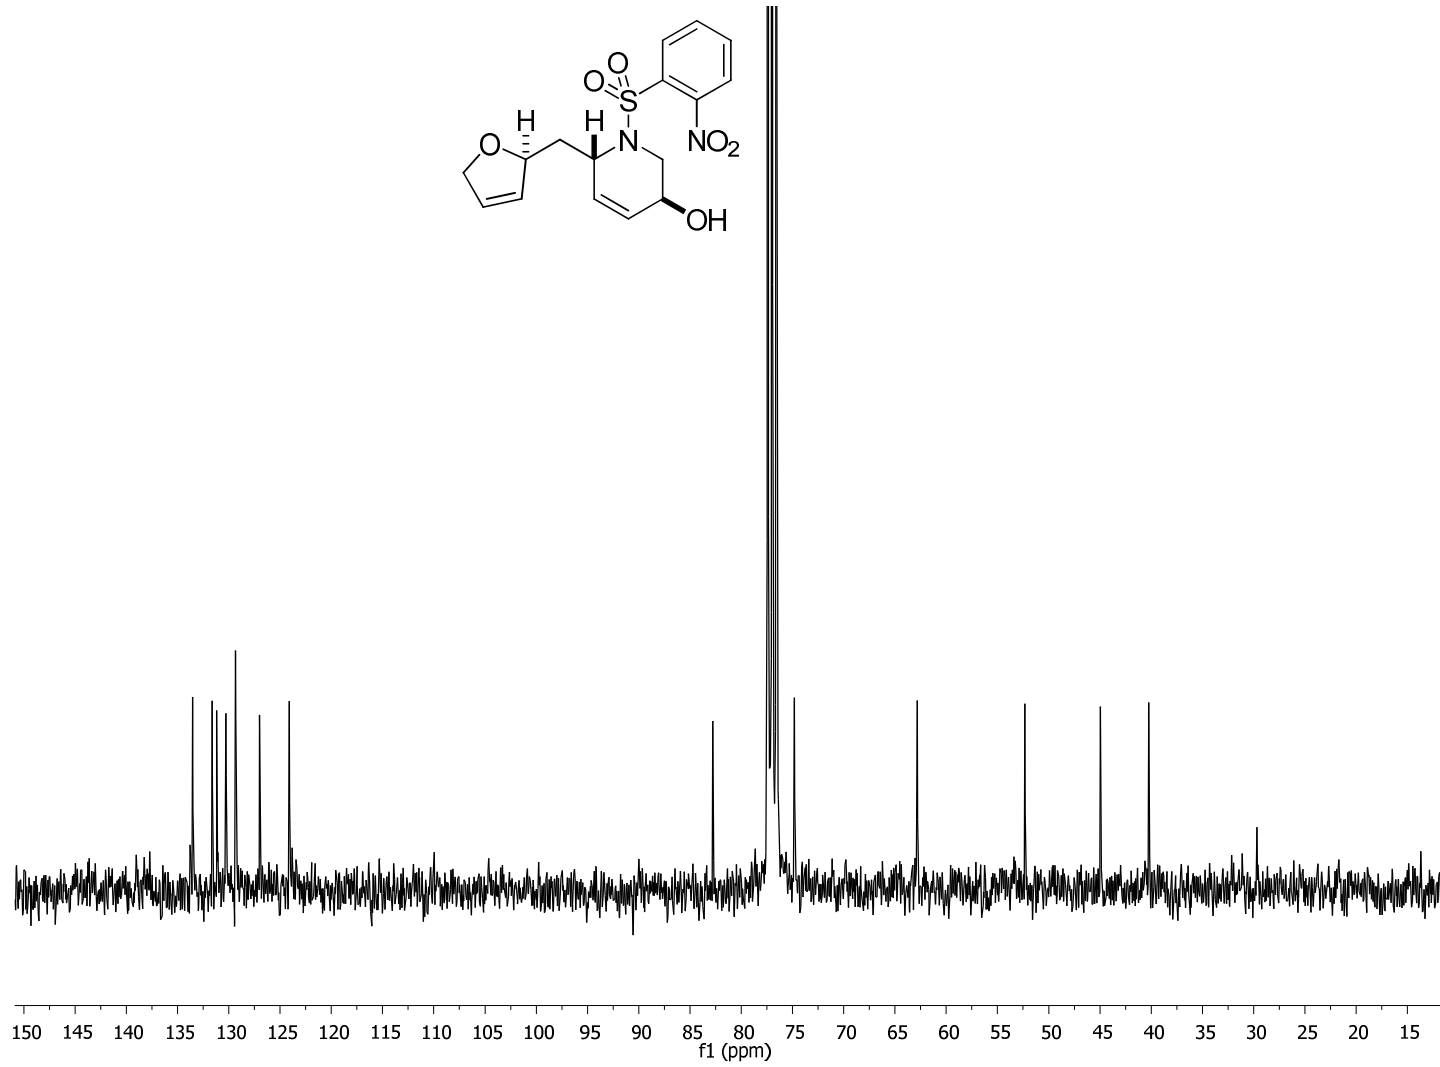

500 MHz  $^1\text{H}$  NMR of S12 (F-SPE purified only)

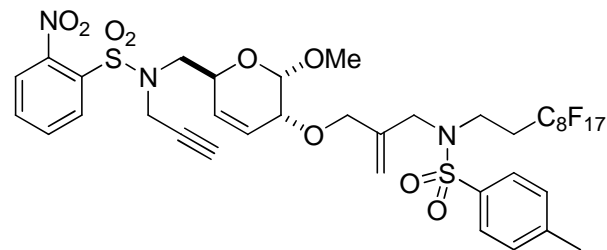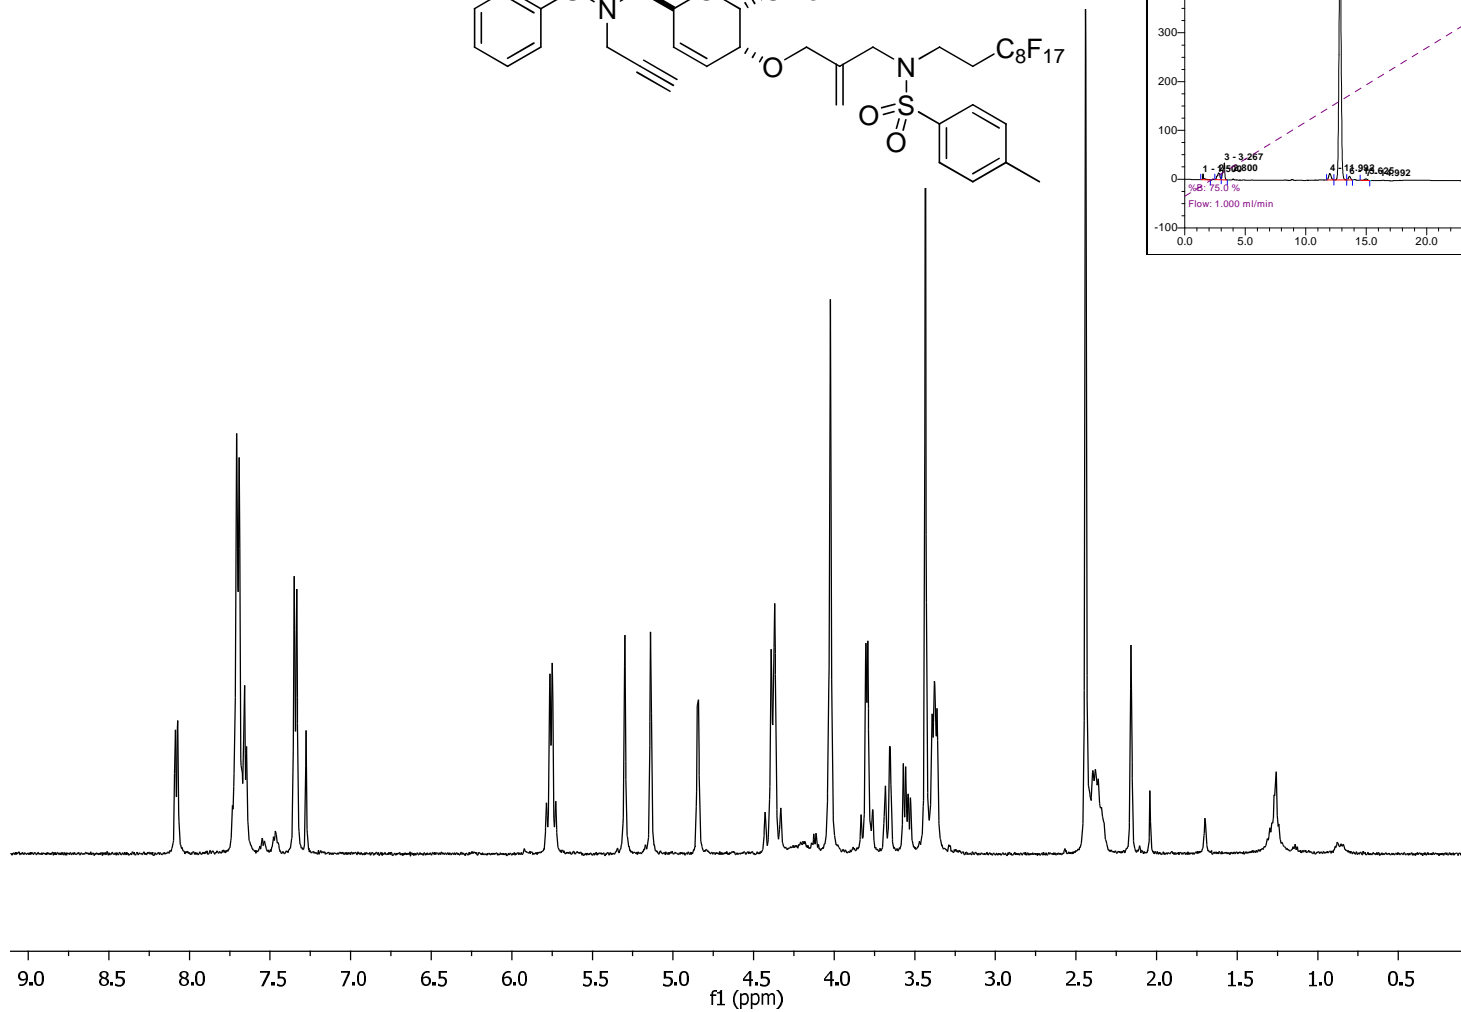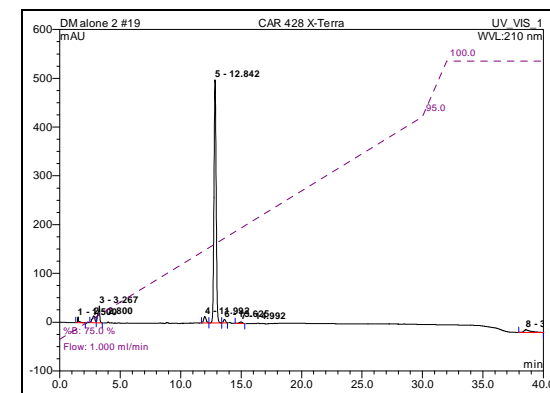

75 MHz  $^{13}\text{C}$  NMR of S12

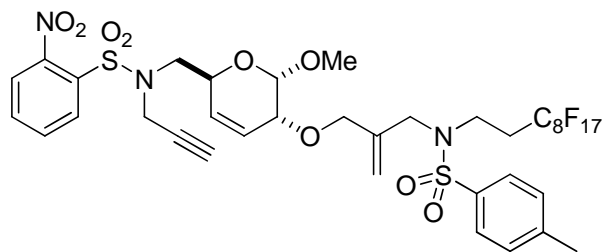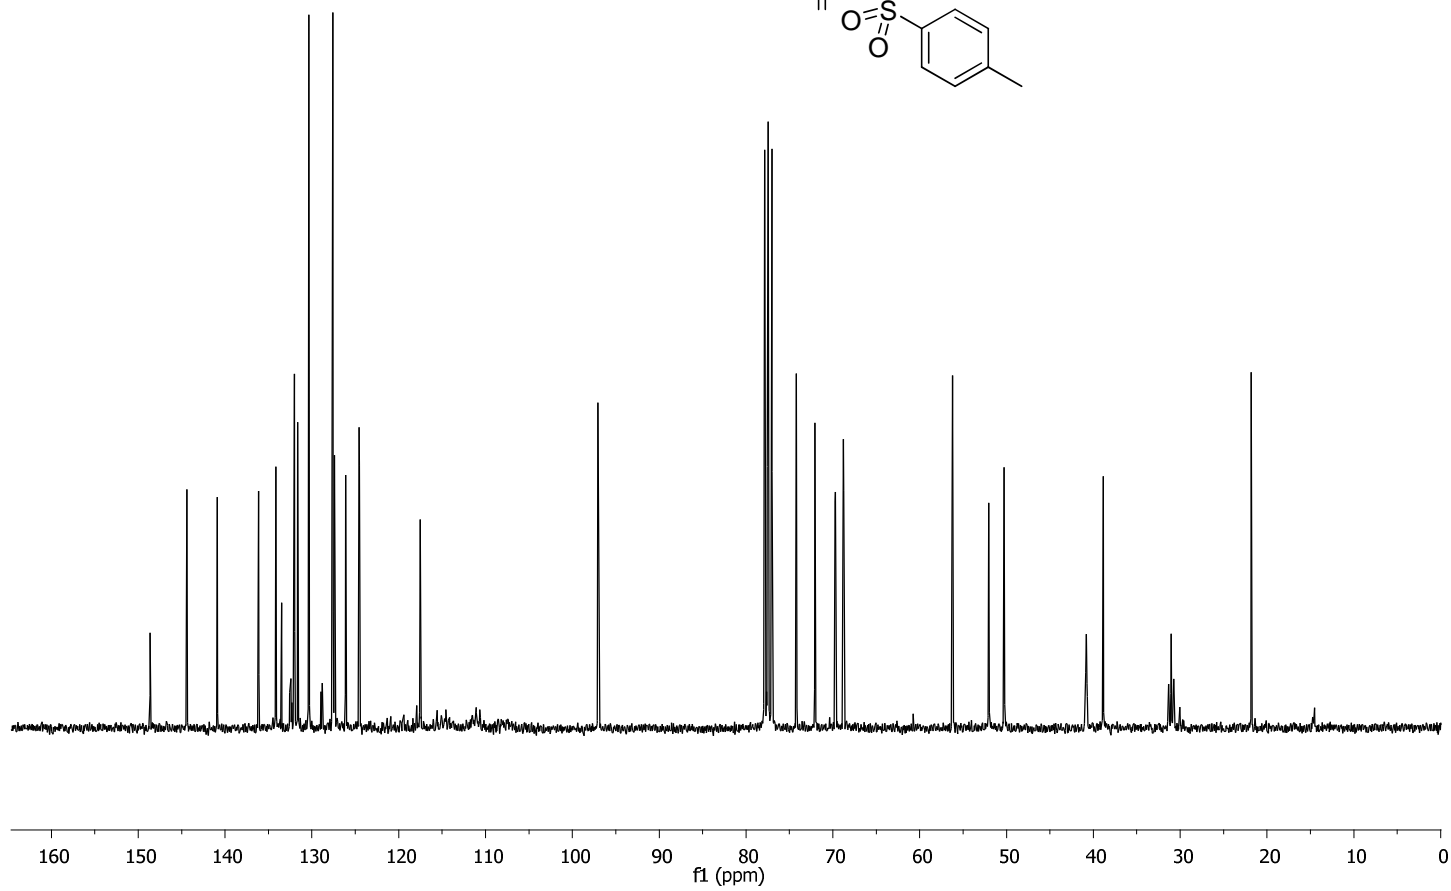

500 MHz  $^1\text{H}$  NMR of 31 ( $\text{R} = \text{R}'^{\text{F}}$ )

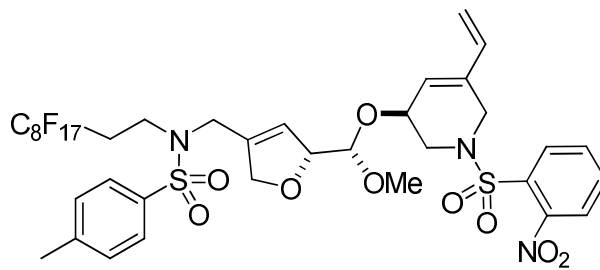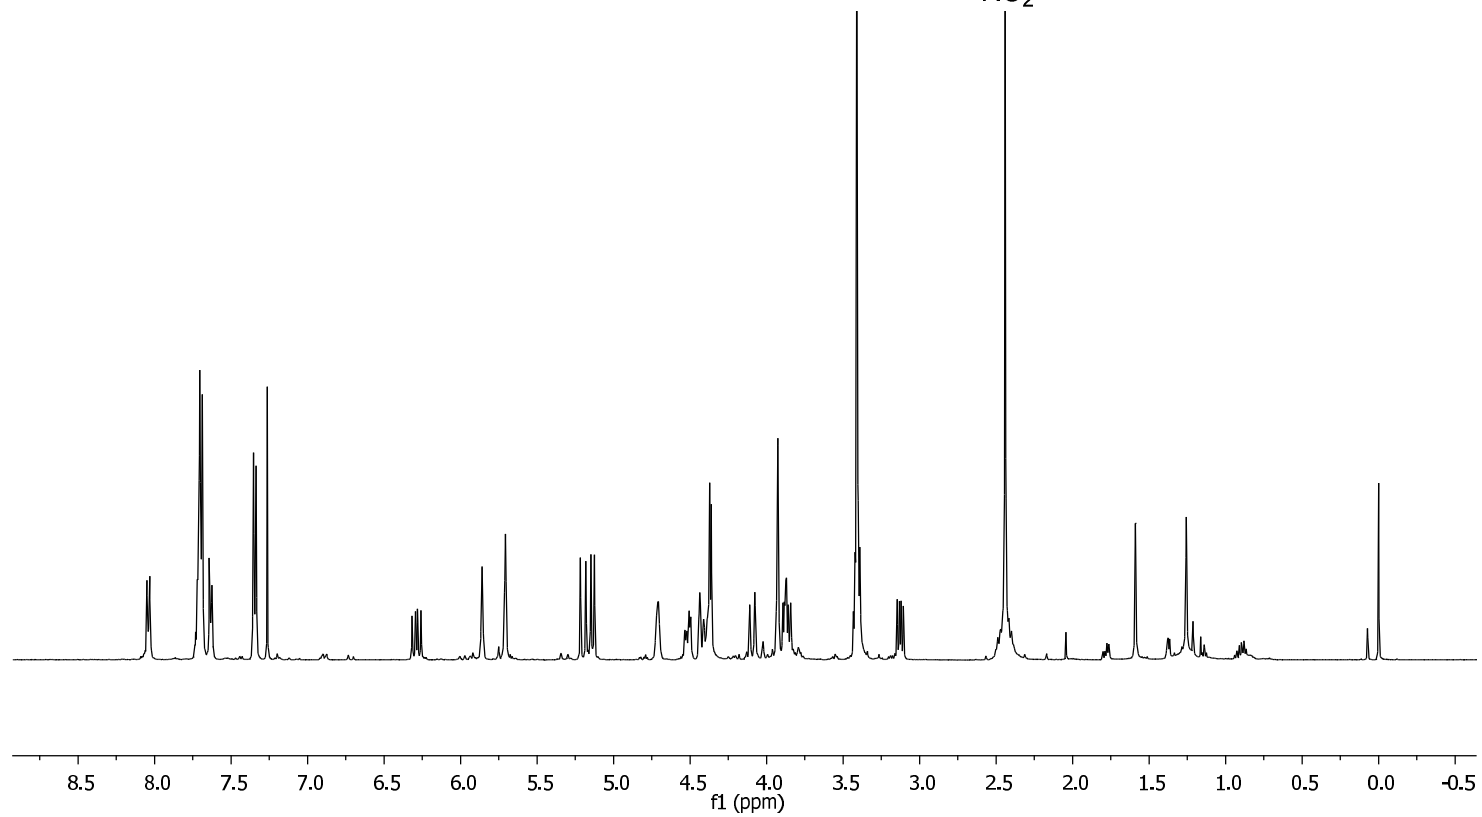

75 MHz  $^1\text{H}$  NMR of 31 ( $\text{R} = \text{R}'^{\text{F}}$ )

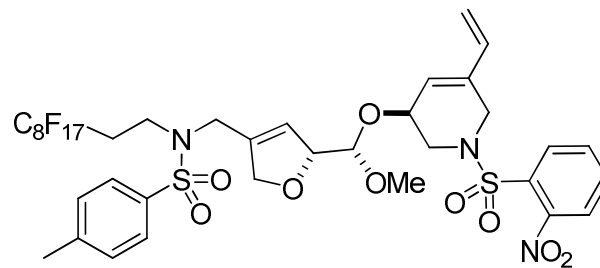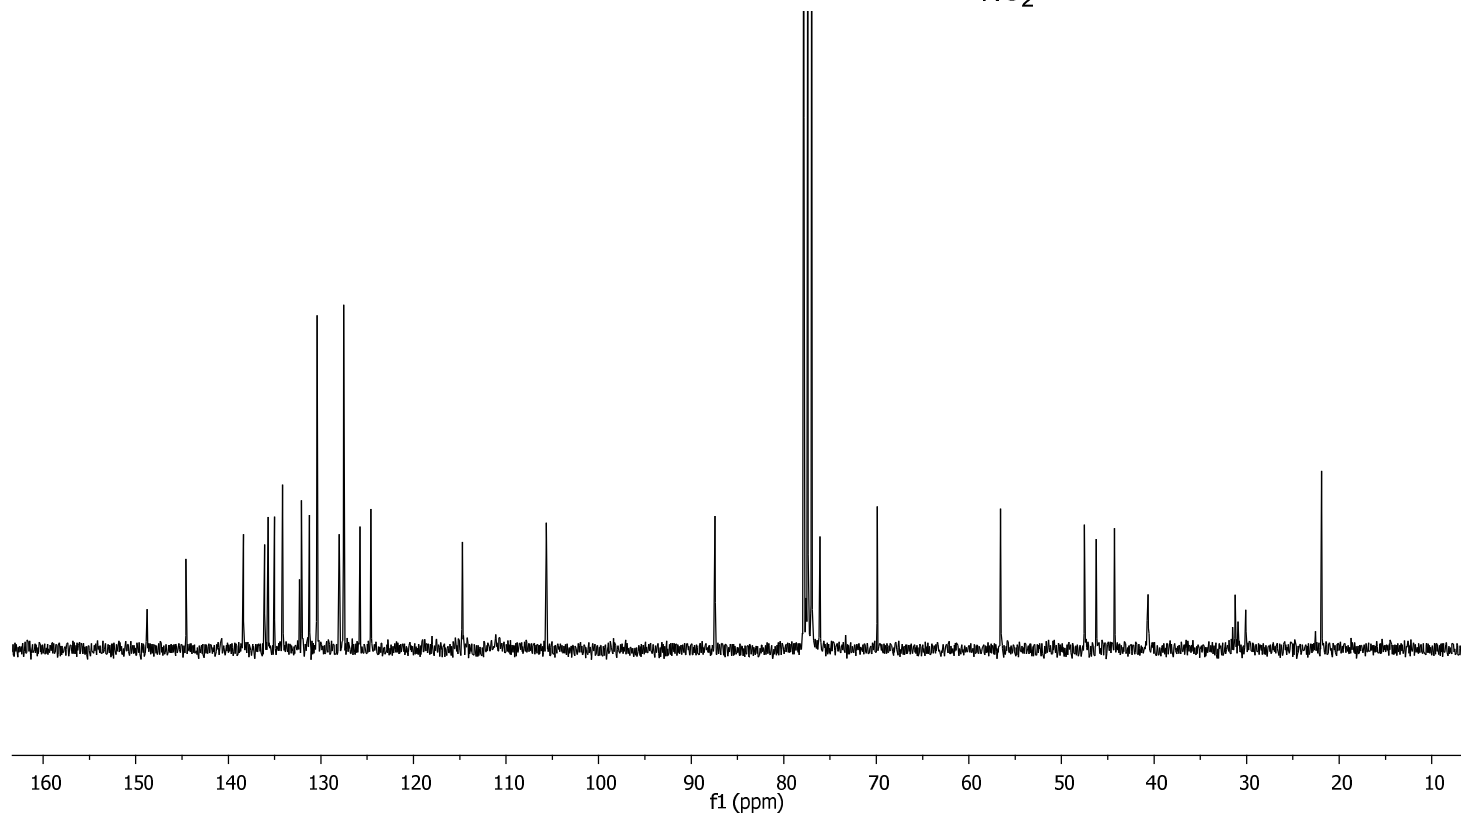

500 MHz  $^1\text{H}$  NMR of 31 (R = H)

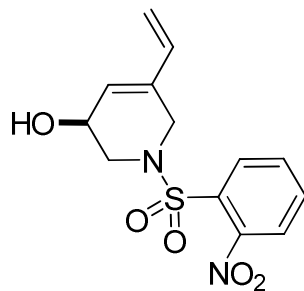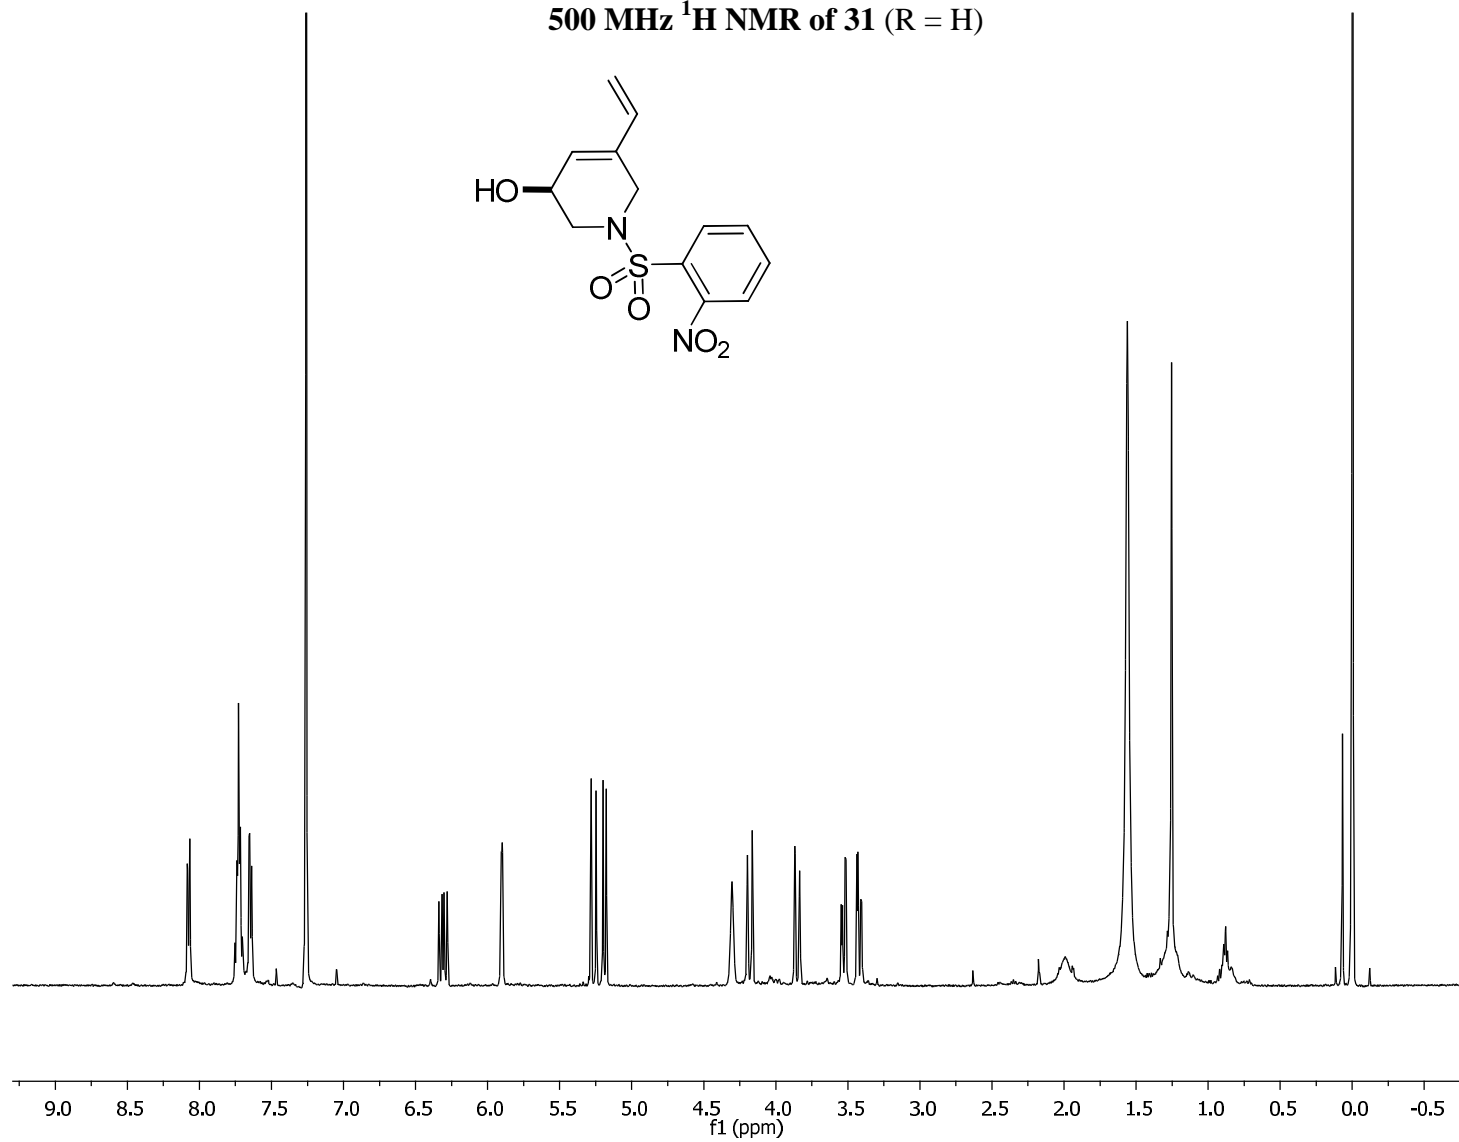



75 MHz  $^{13}\text{C}$  NMR of 31 (R = H)

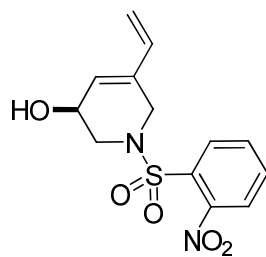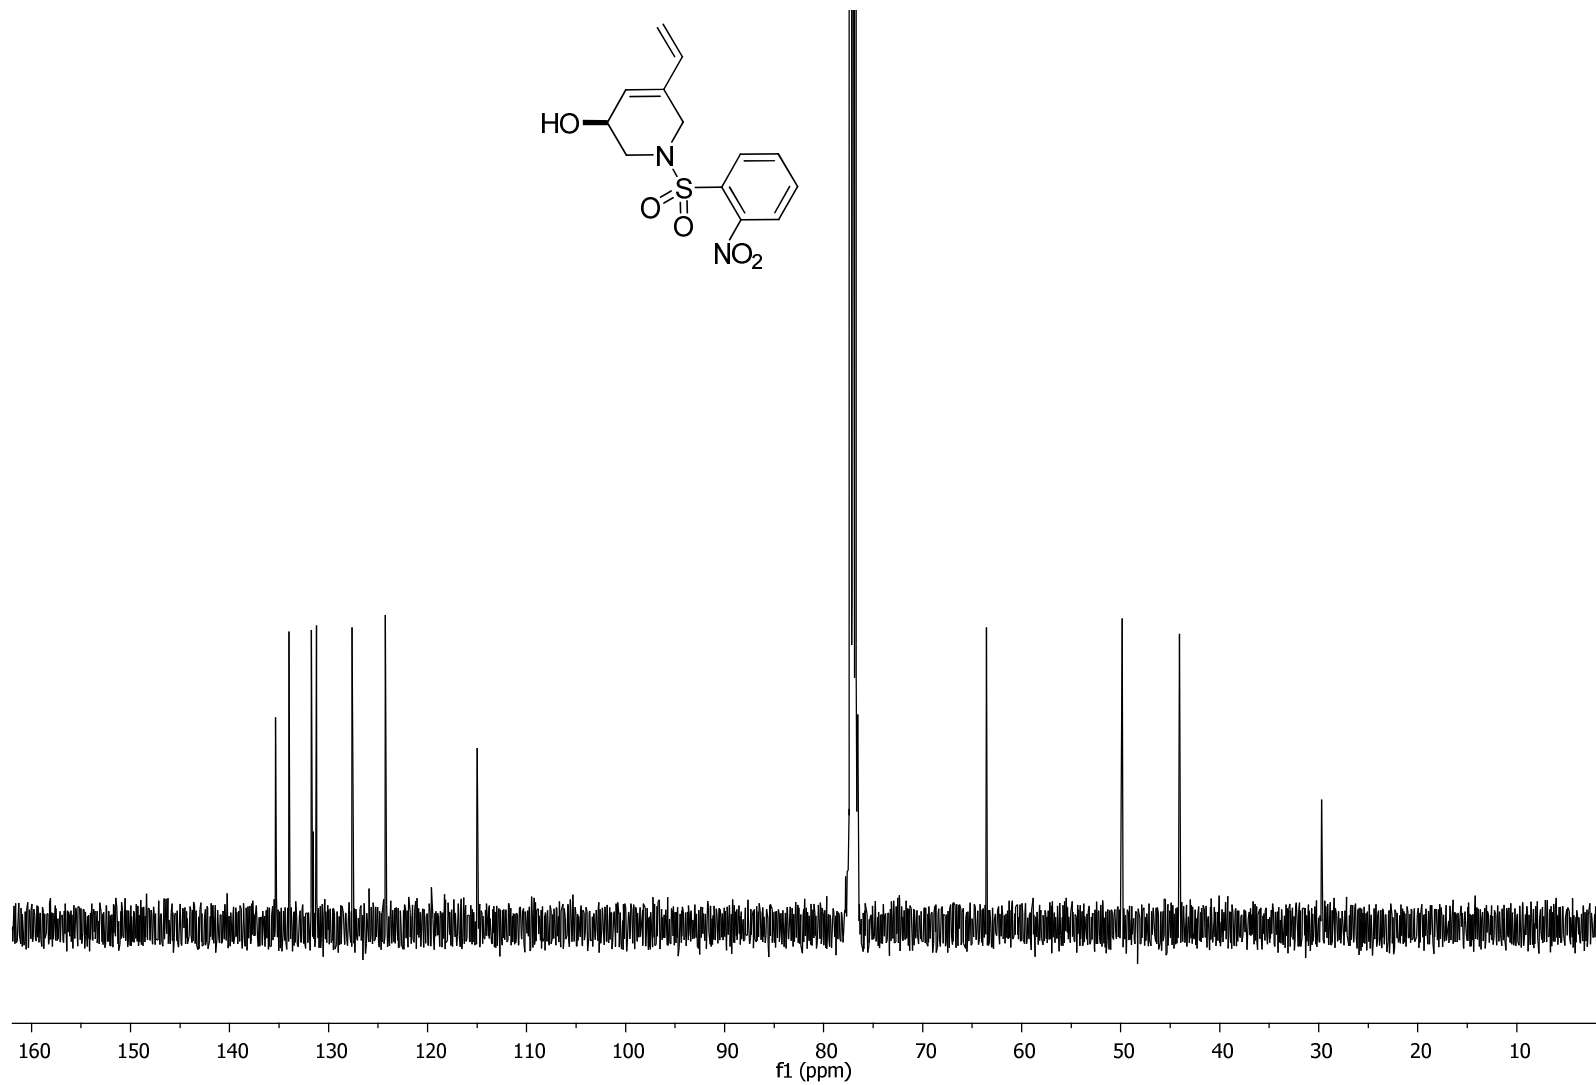



75 MHz  $^1\text{H}$  NMR of S13

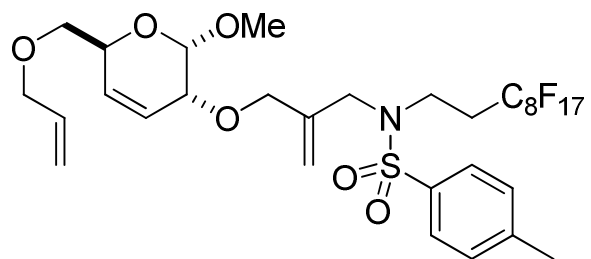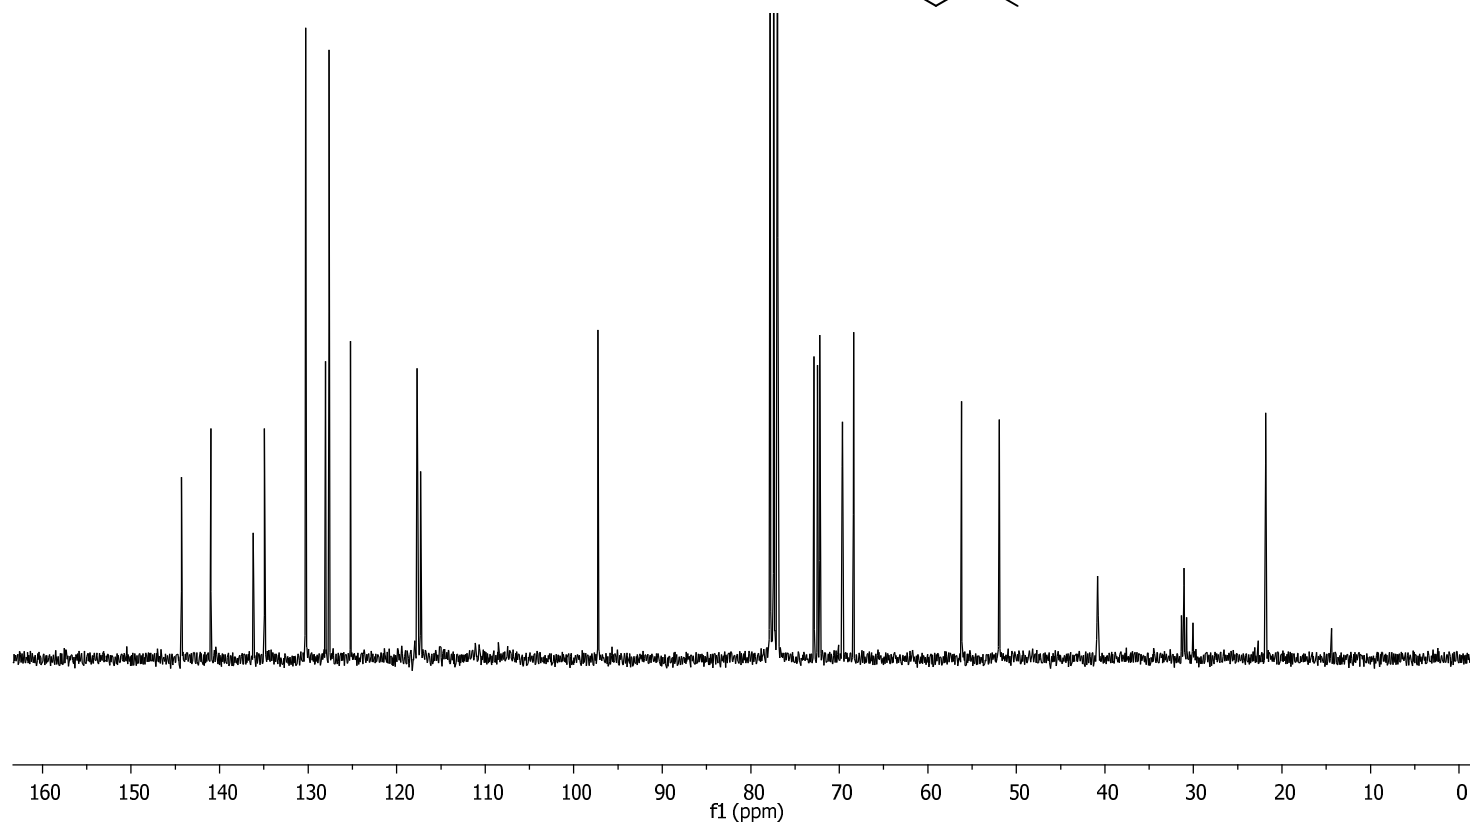

500 MHz  $^1\text{H}$  NMR of 32 ( $\text{R} = \text{R}'^{\text{F}}$ )

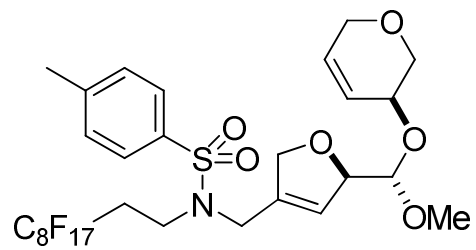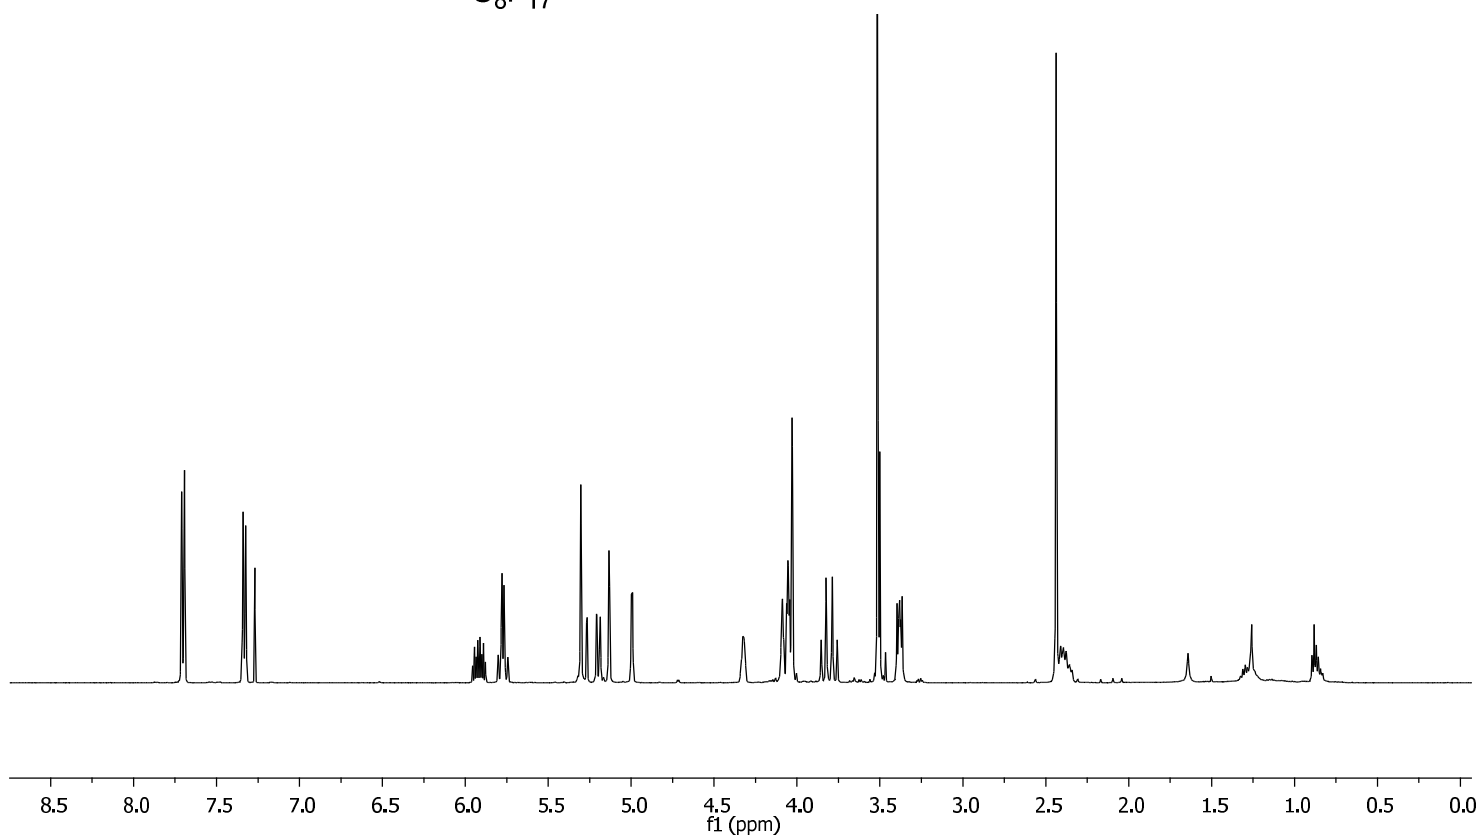

75 MHz  $^{13}\text{C}$  NMR of 32 ( $\text{R} = \text{R}^{\text{F}}$ )

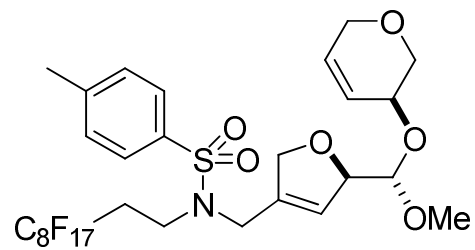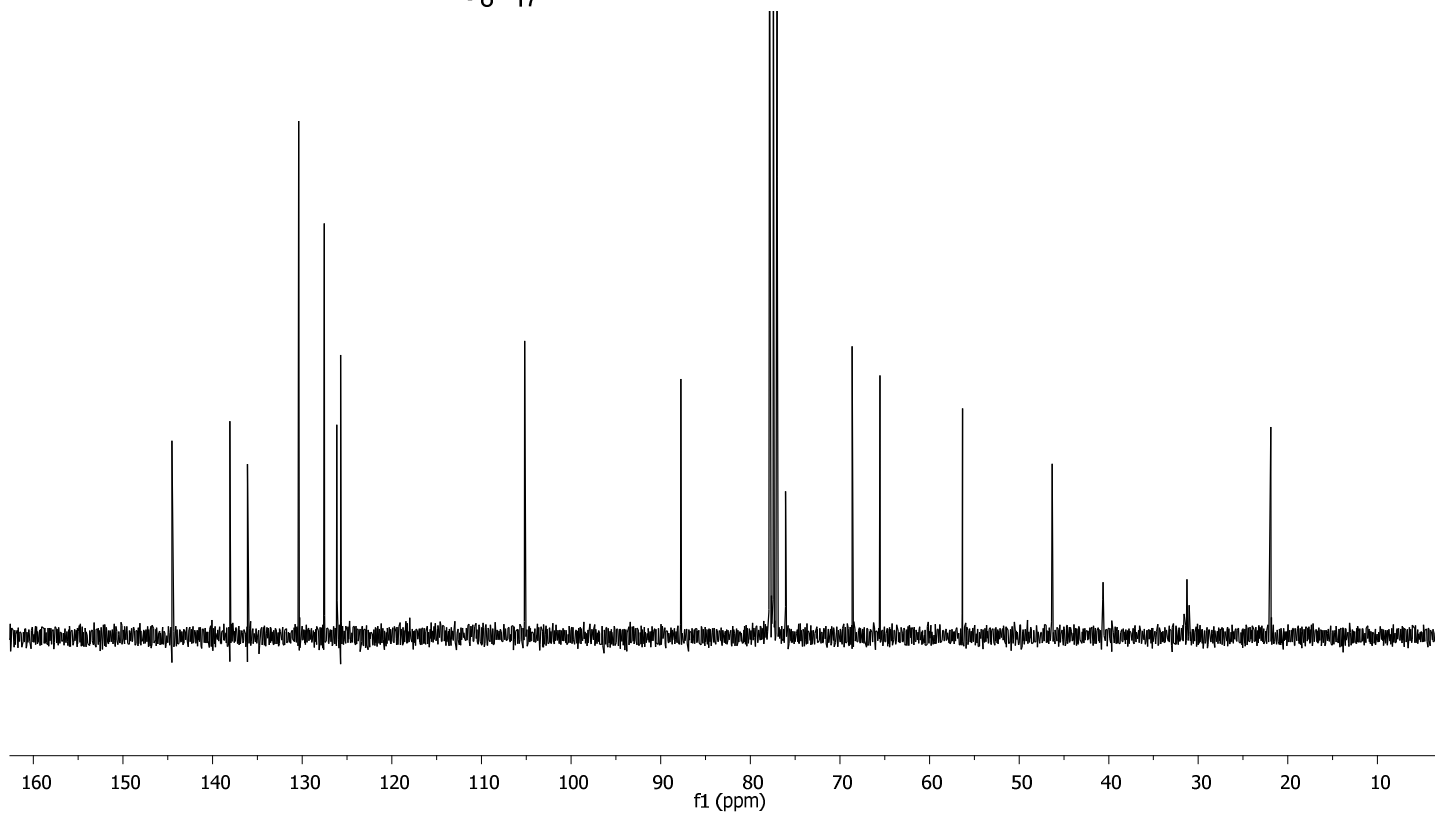

**$^1\text{H}$  NMR of 33 ( $\text{R} = \text{R}'^{\text{F}}$ ) (F-SPE purified only)**

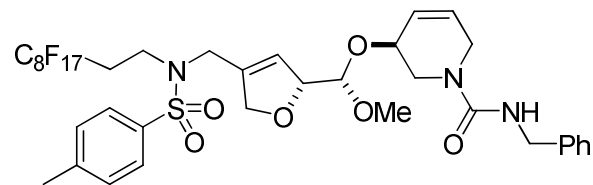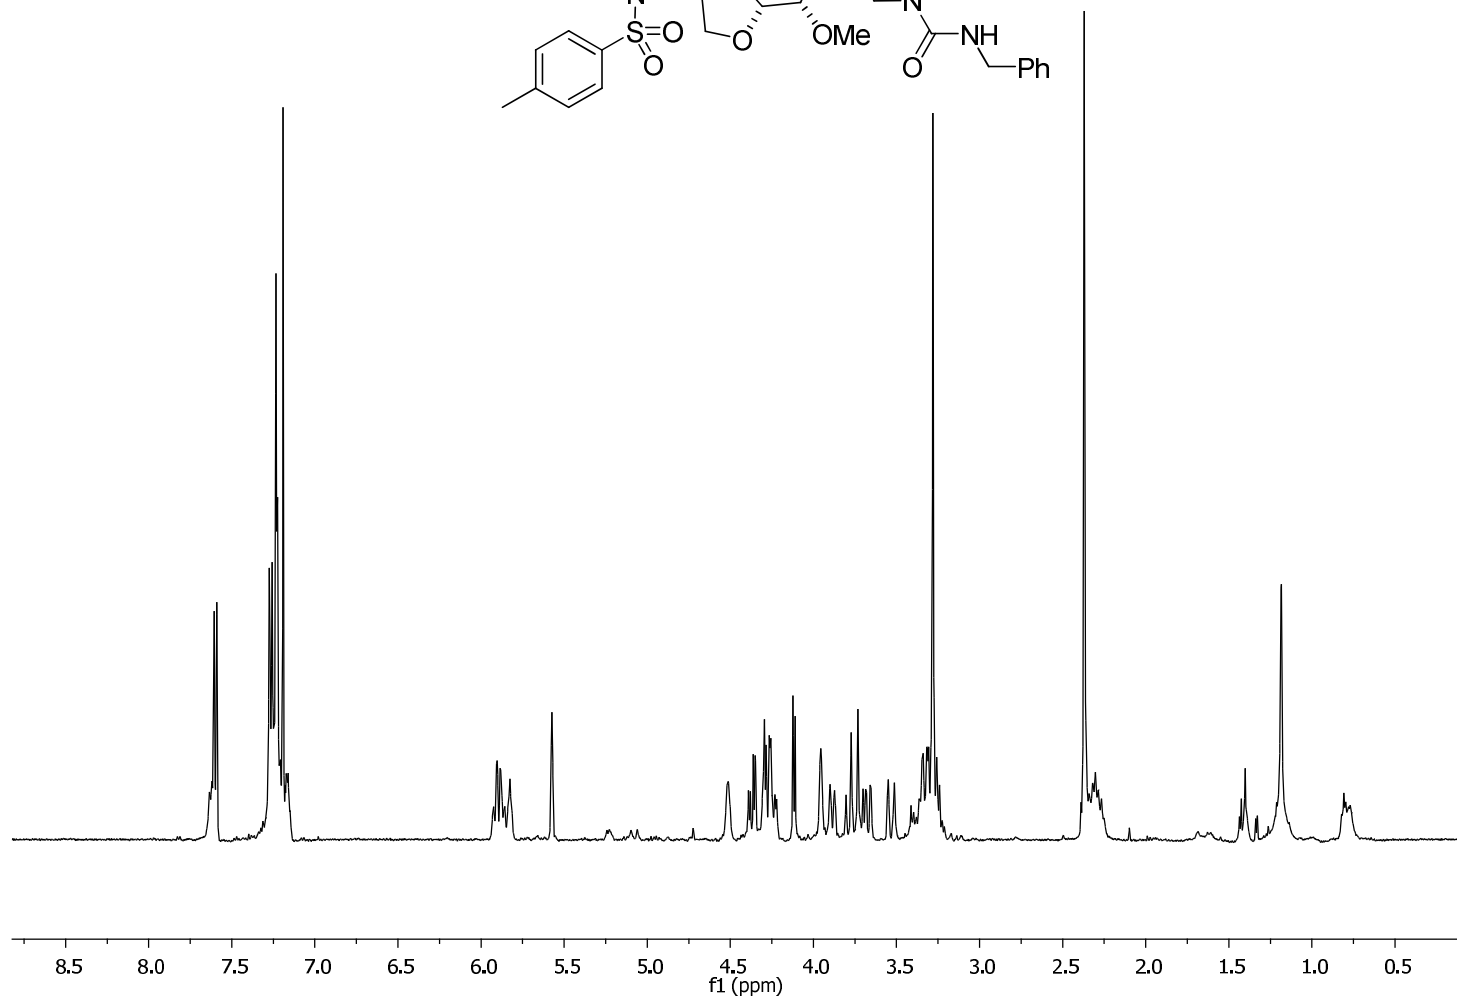

75 MHz  $^{13}\text{C}$  NMR of 33 ( $\text{R} = \text{R}'^{\text{F}}$ )

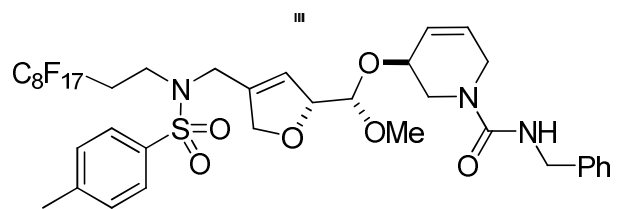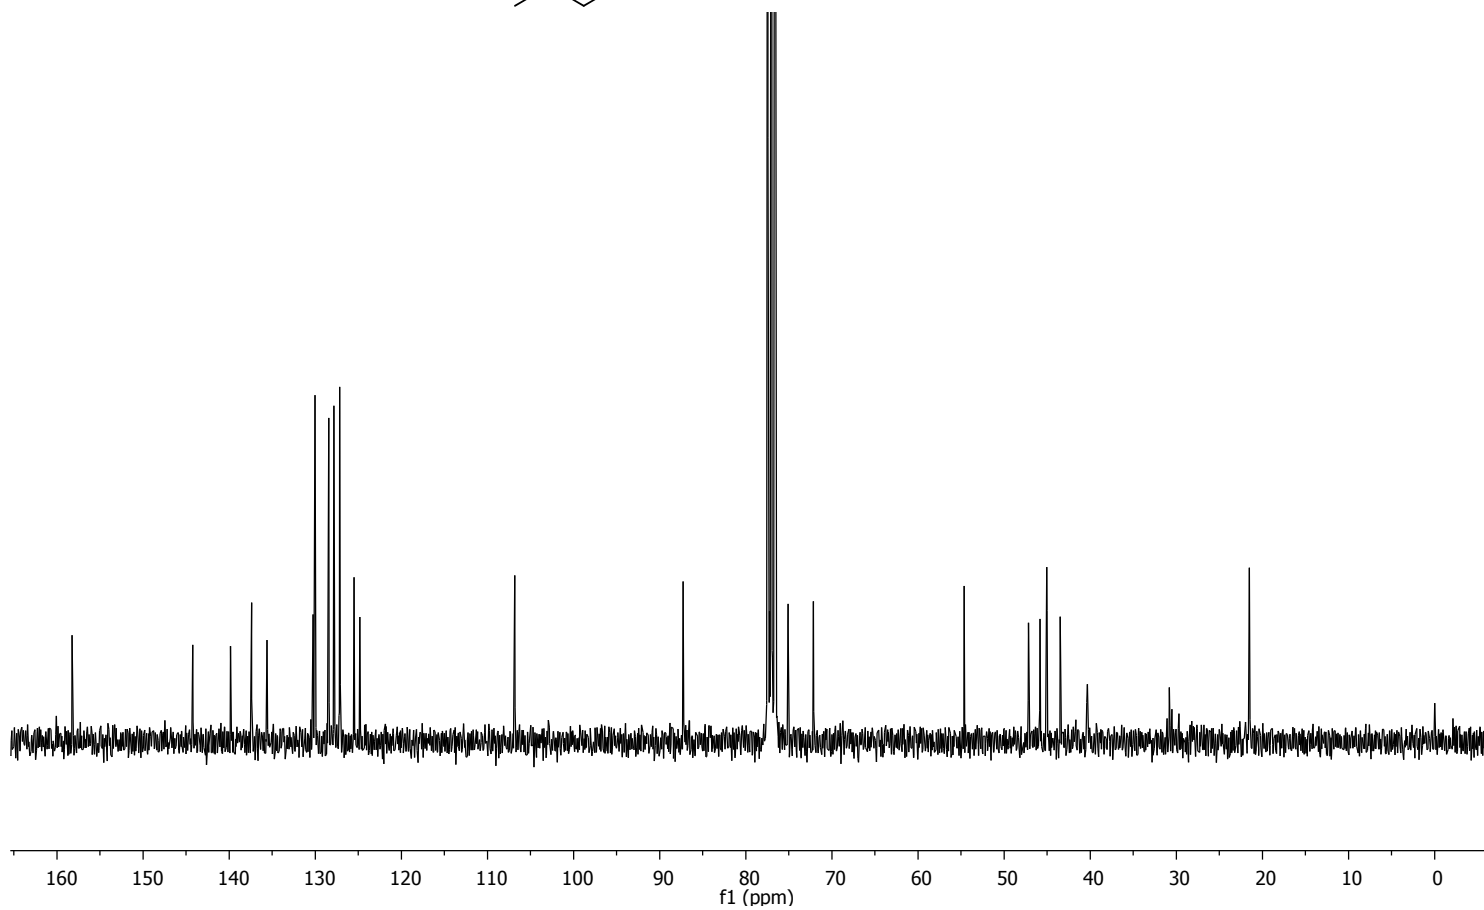

500 MHz  $^1\text{H}$  NMR of 33 (R = H)

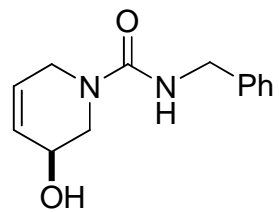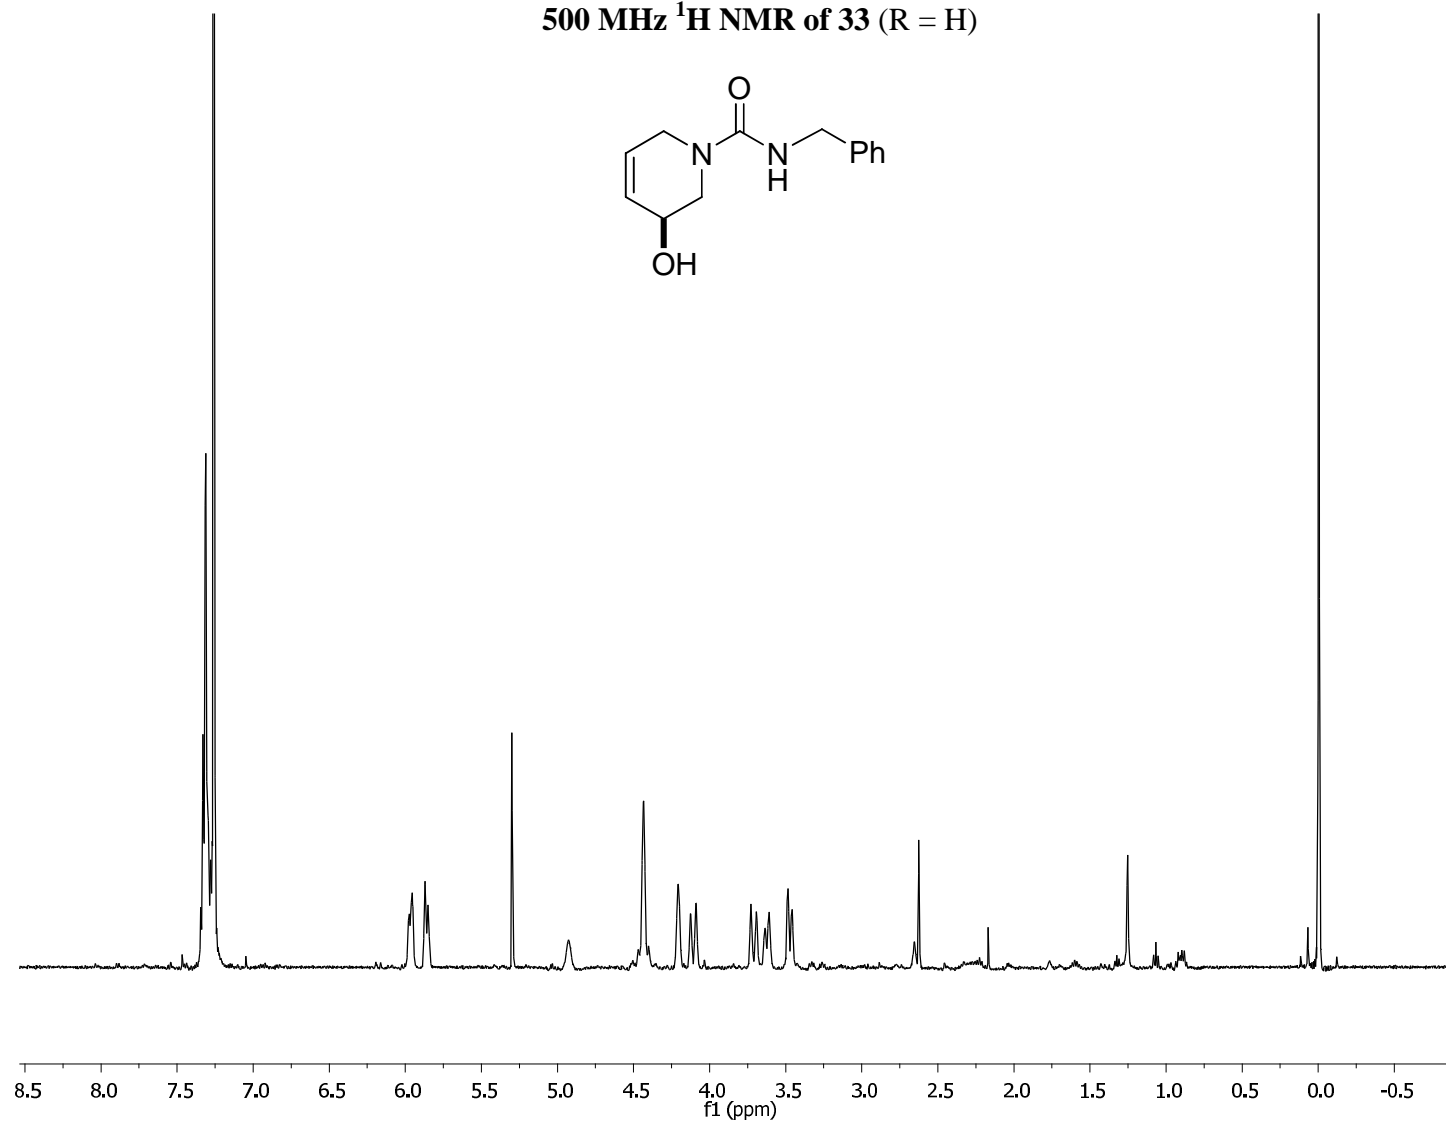



75 MHz  $^{13}\text{C}$  NMR of 33 (R = H)

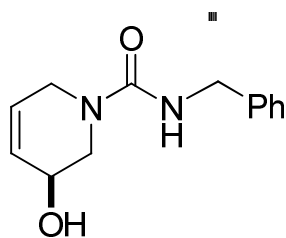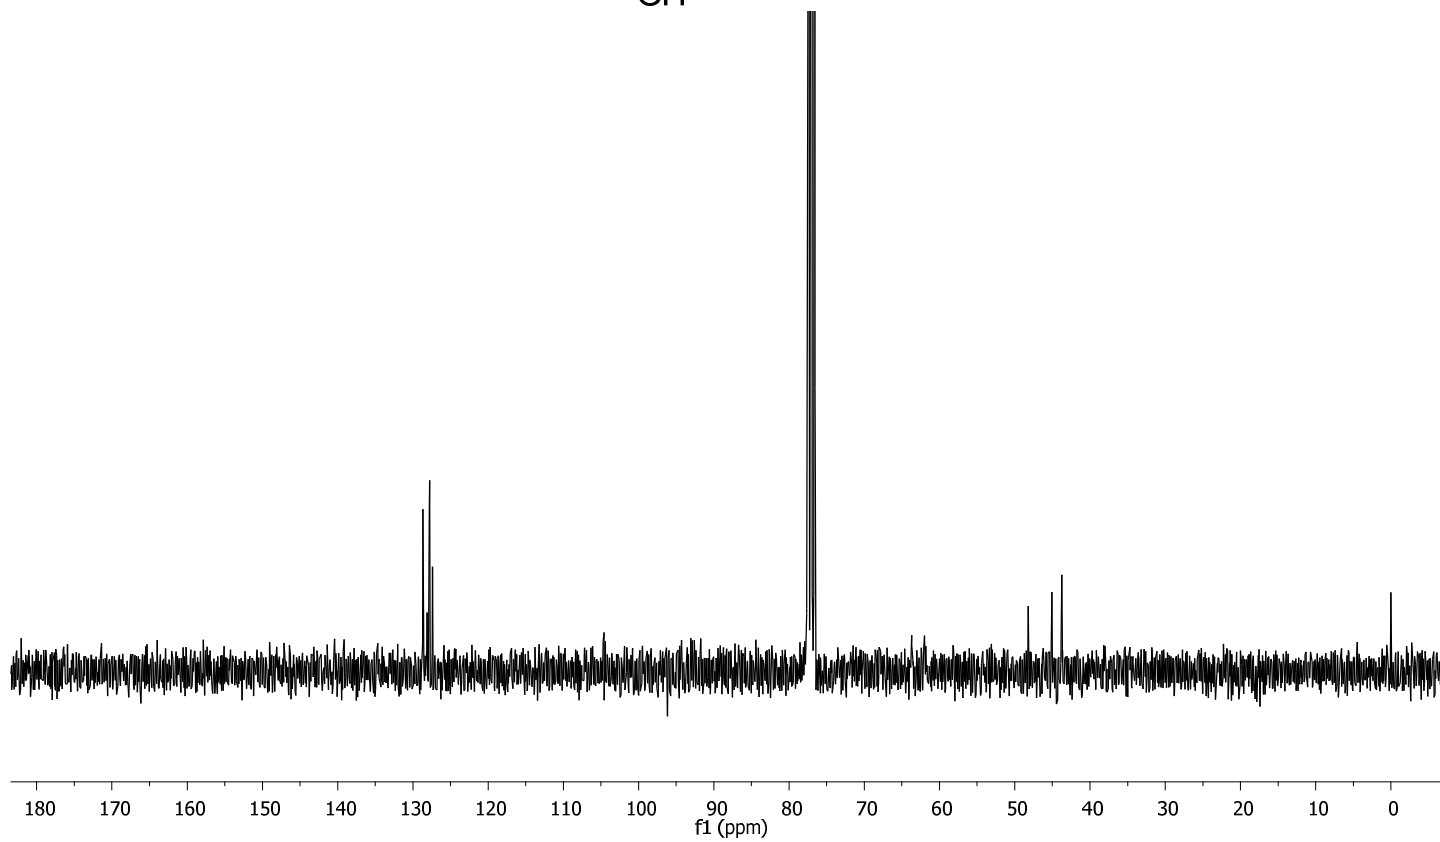

**$^1\text{H}$  NMR of 34 (R = R<sup>F</sup>) (F-SPE purified only)**

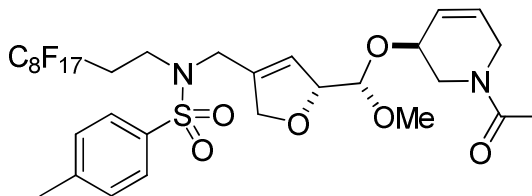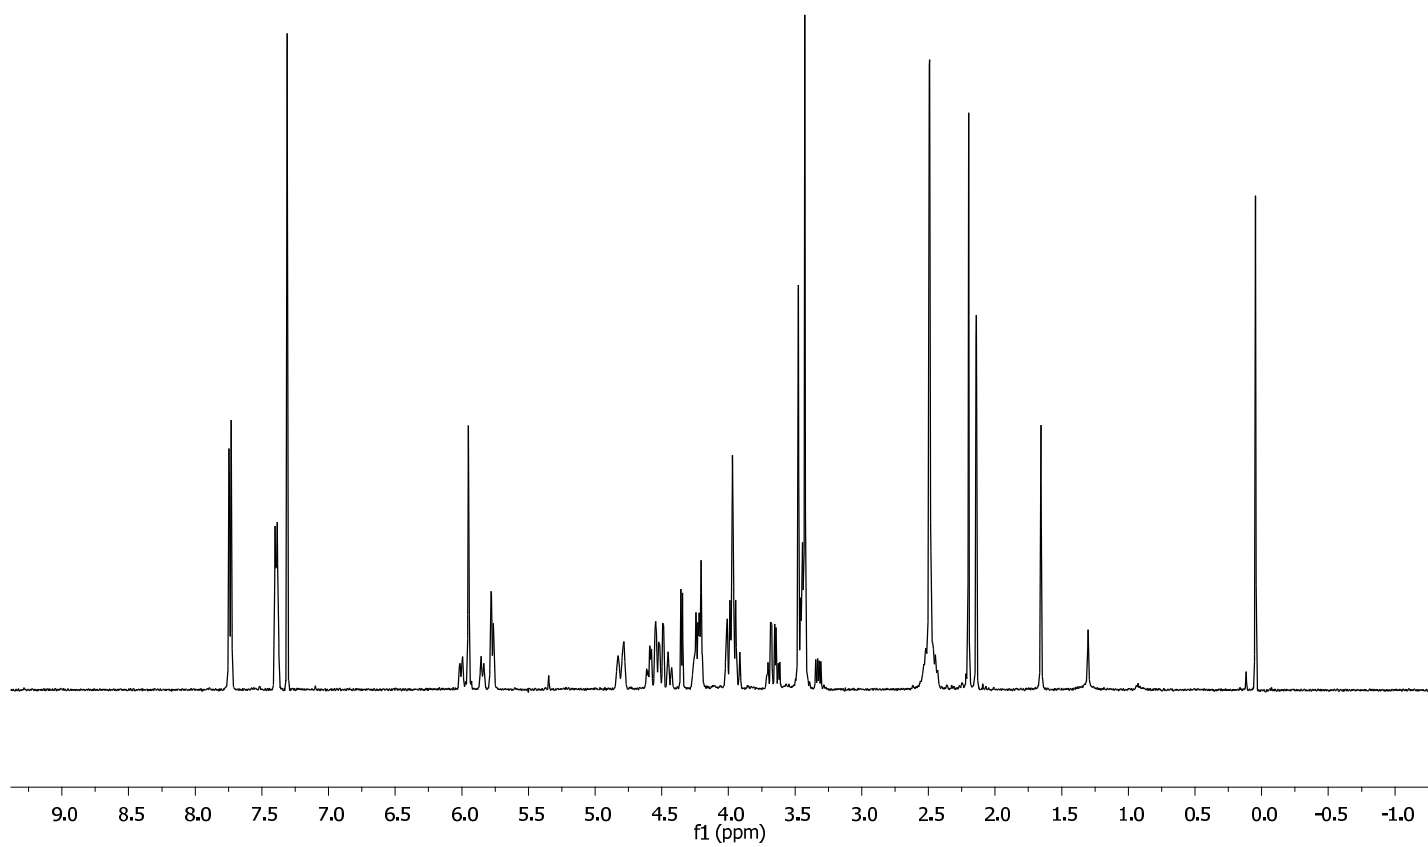

500 MHz  $^1\text{H}$  NMR of 34 (R = H)

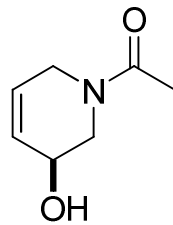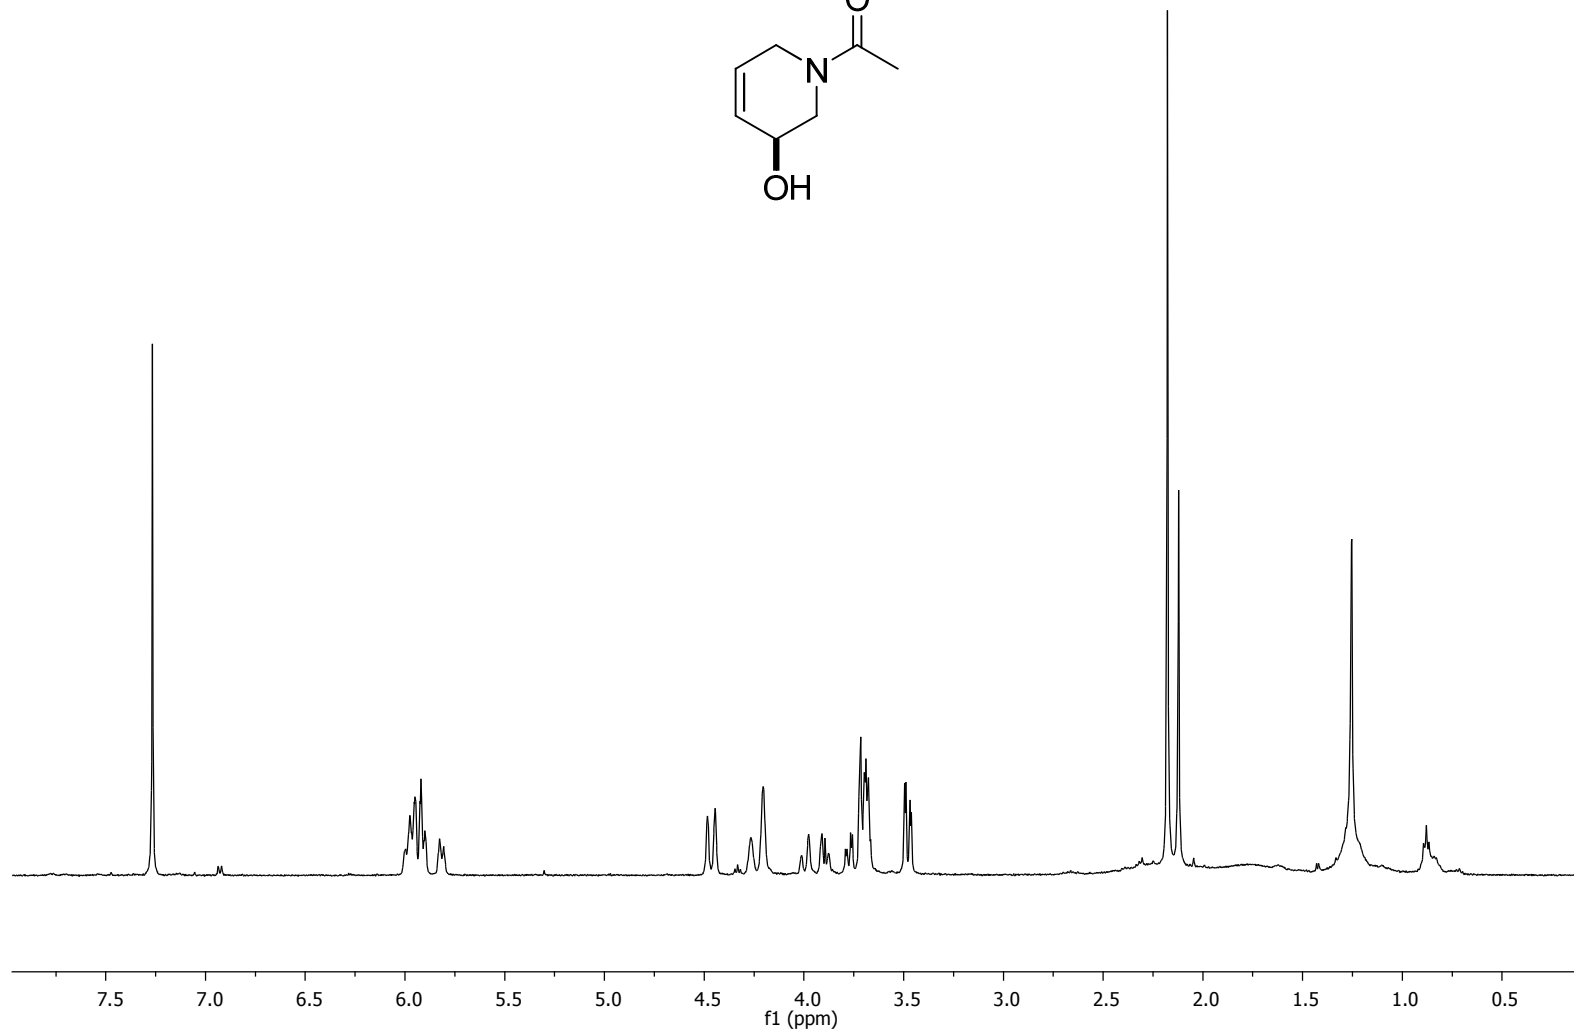

75 MHz  $^{13}\text{C}$  NMR of 34 (R = H)

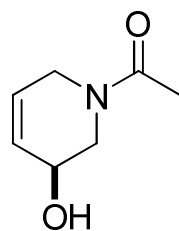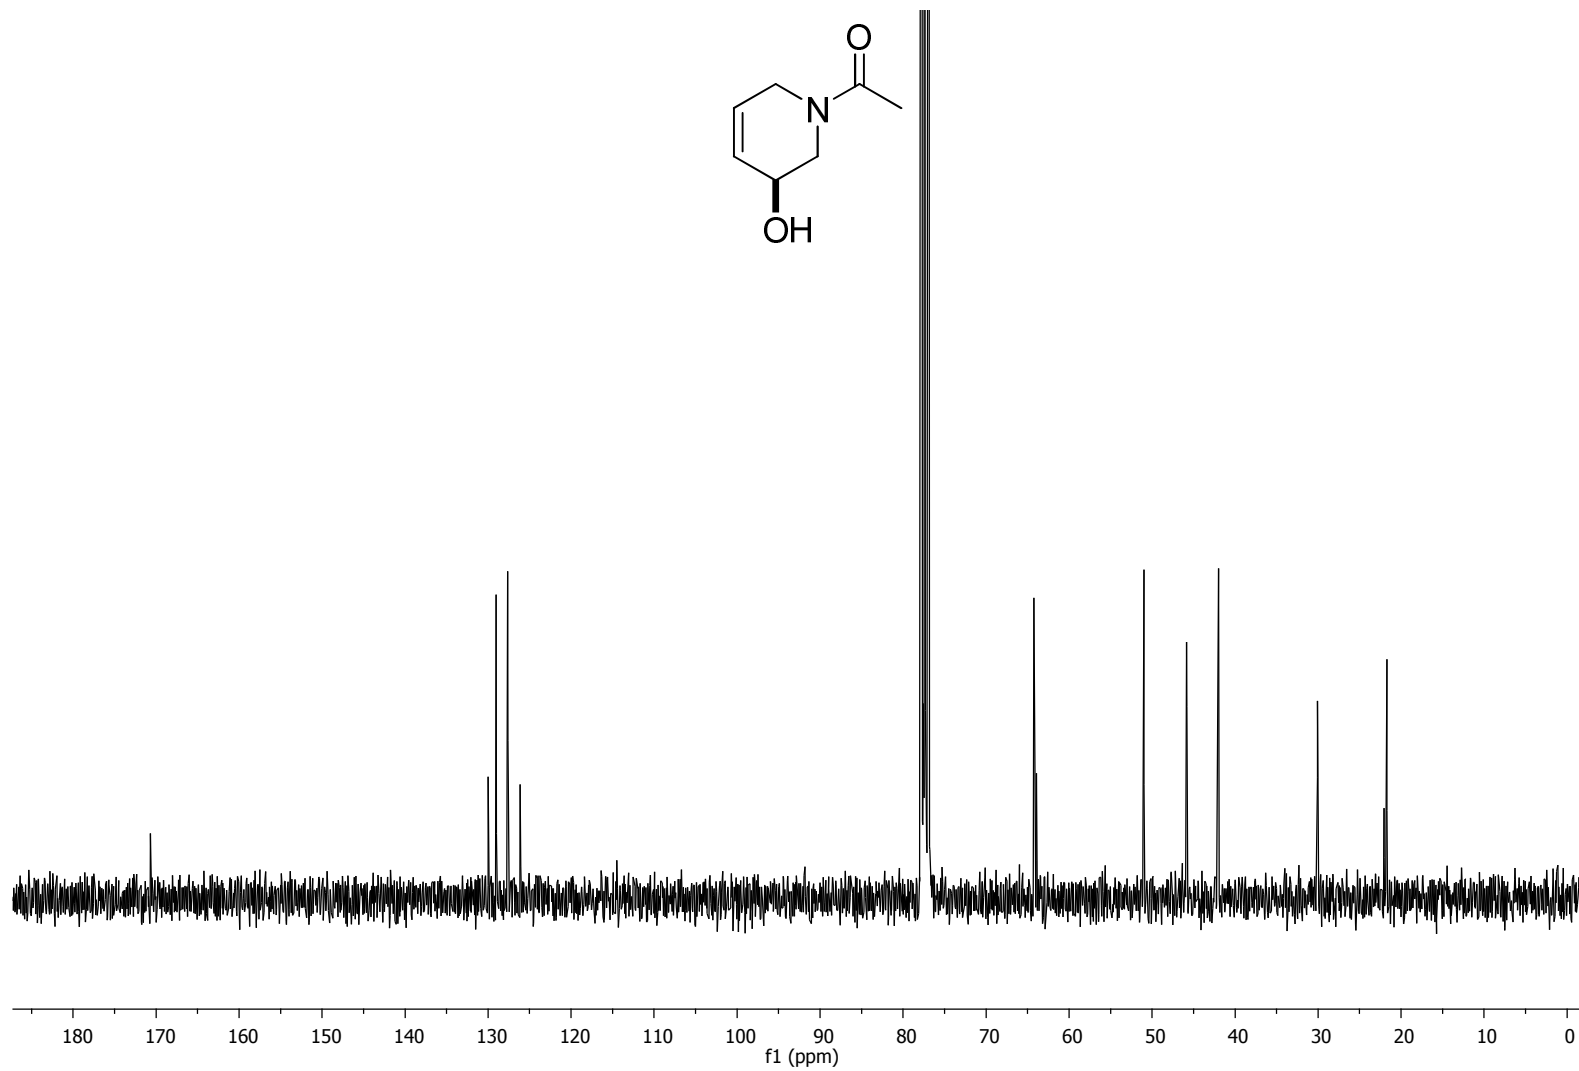

500 MHz  $^1\text{H}$  NMR of 35 (R = H)

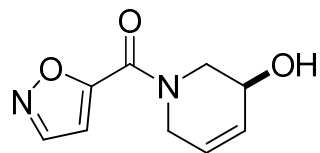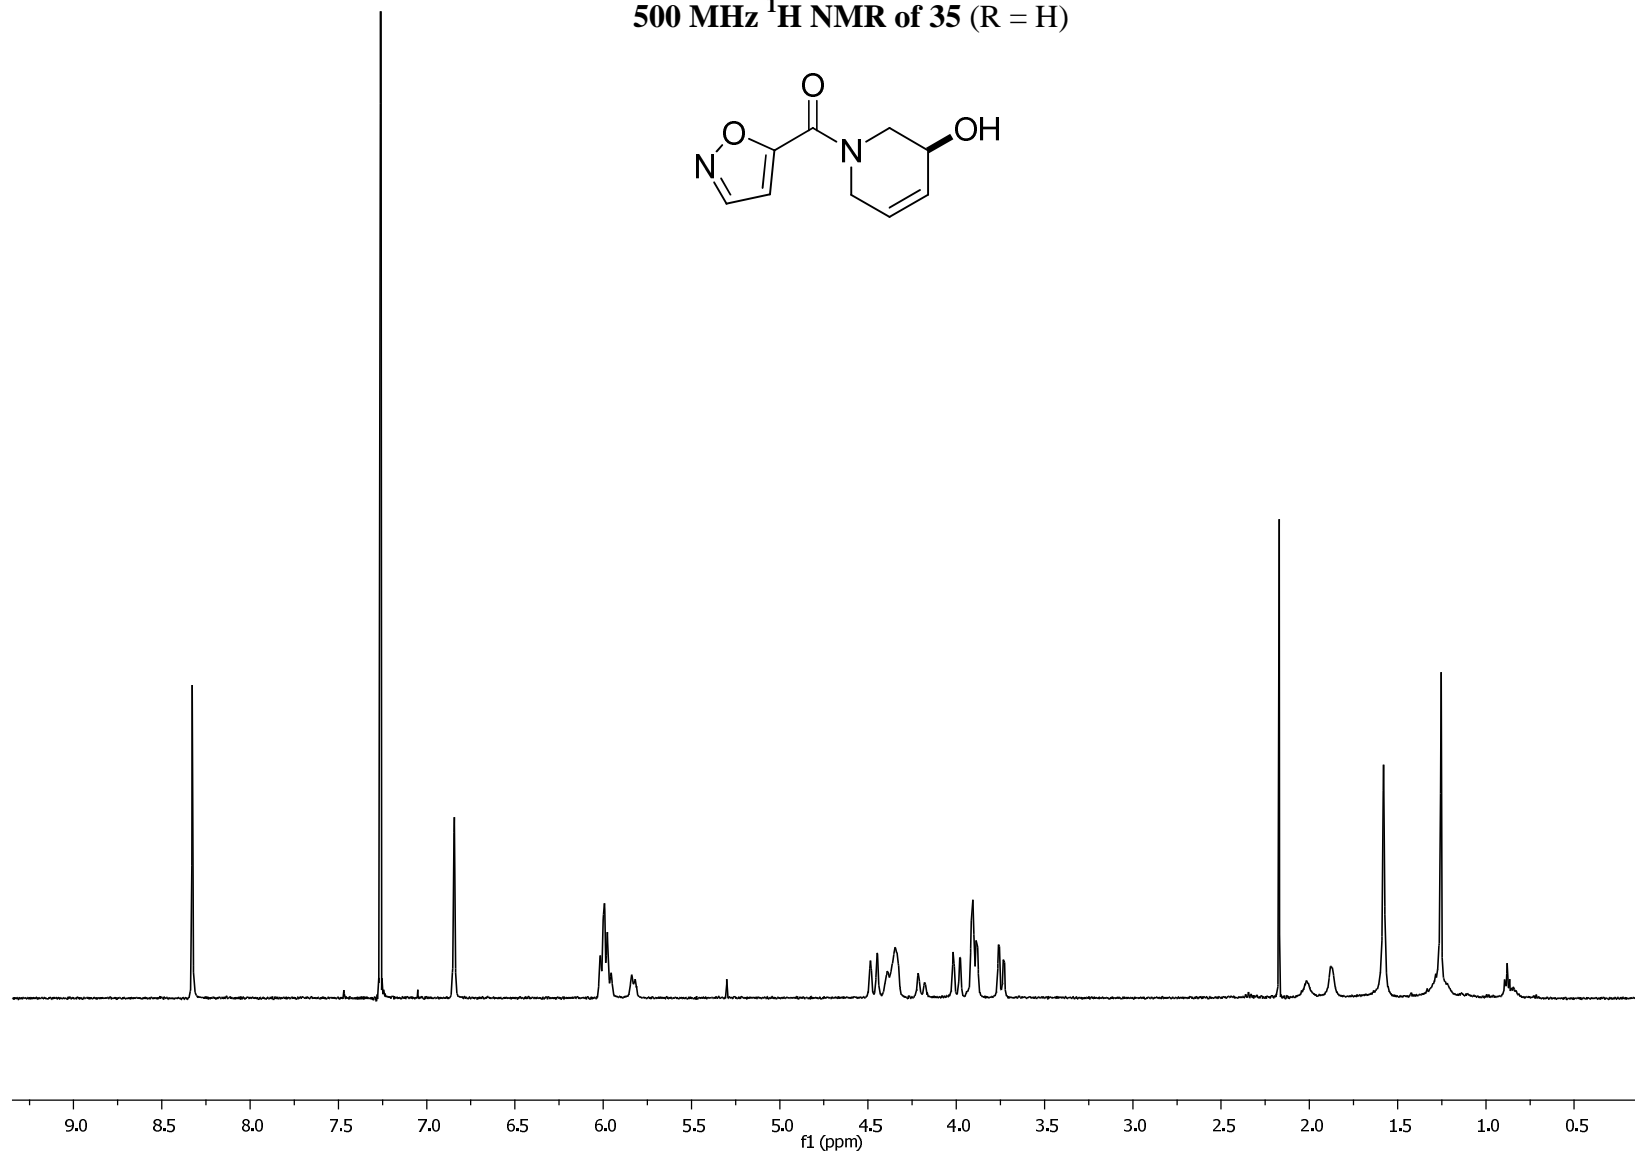

75 MHz  $^{13}\text{C}$  NMR of 35 (R = H)

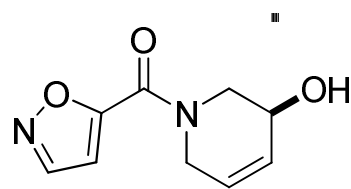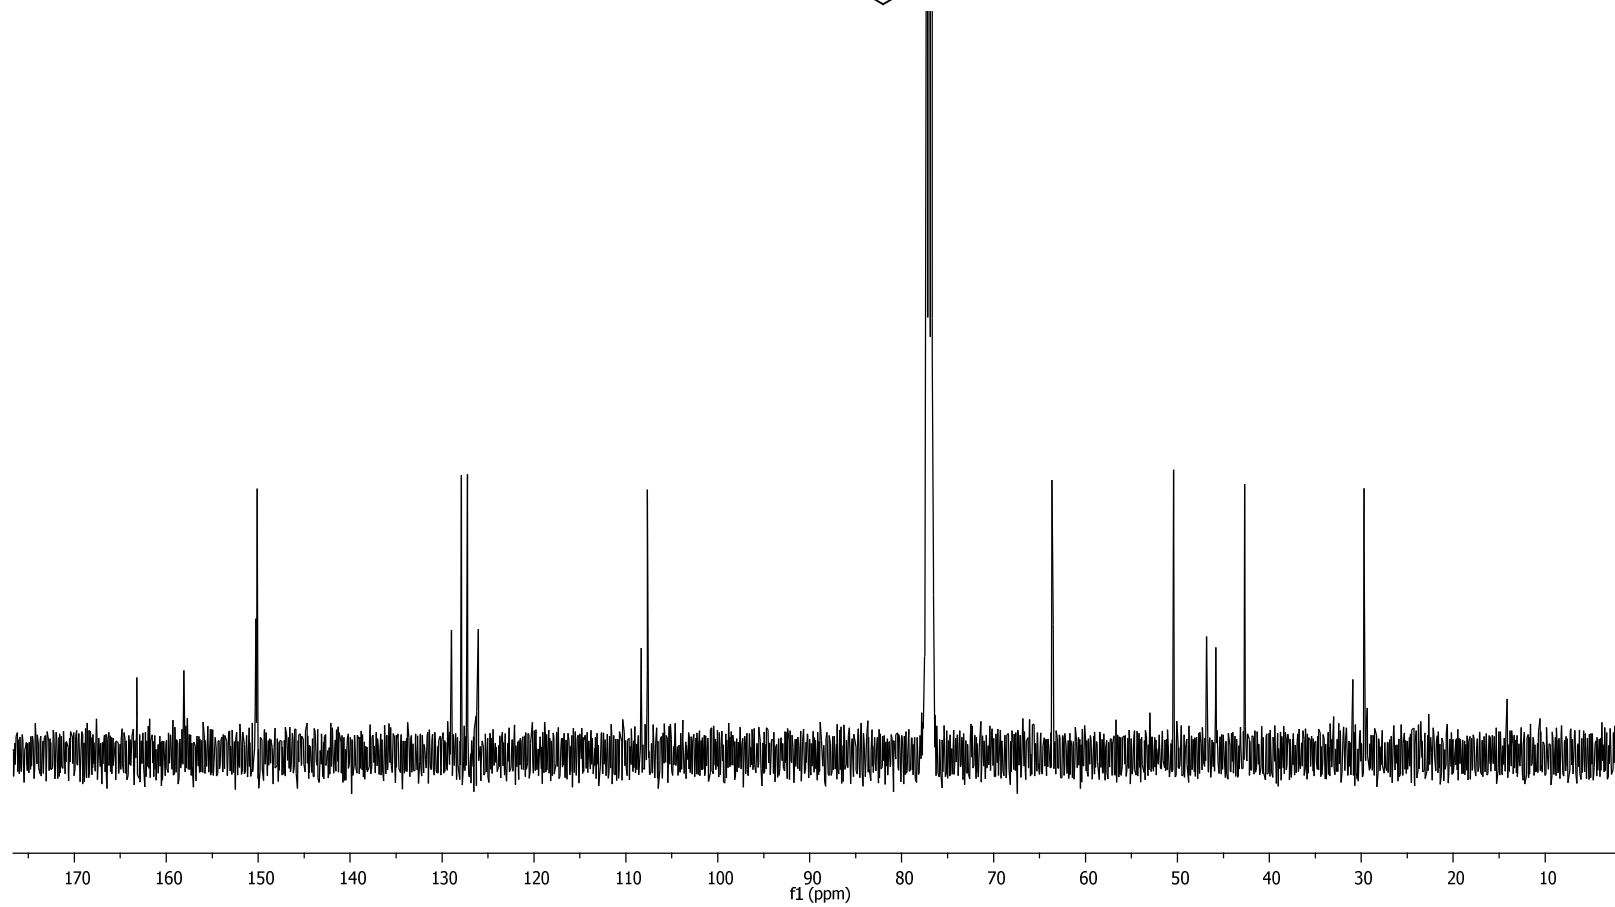

**$^1\text{H}$  NMR of 36 (R = R<sup>F</sup>) (F-SPE purified only)**

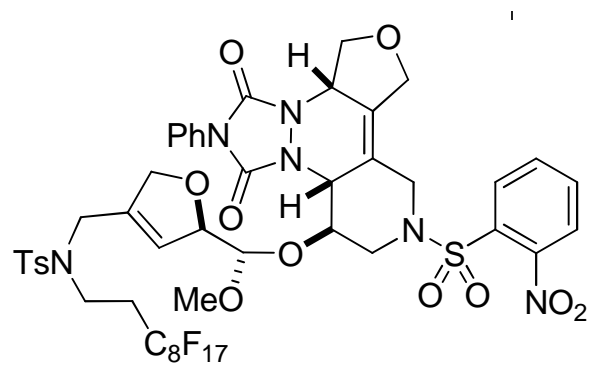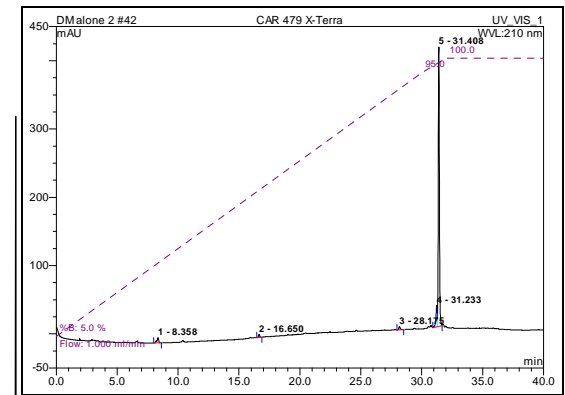

**HPLC trace after F-SPE purification only**

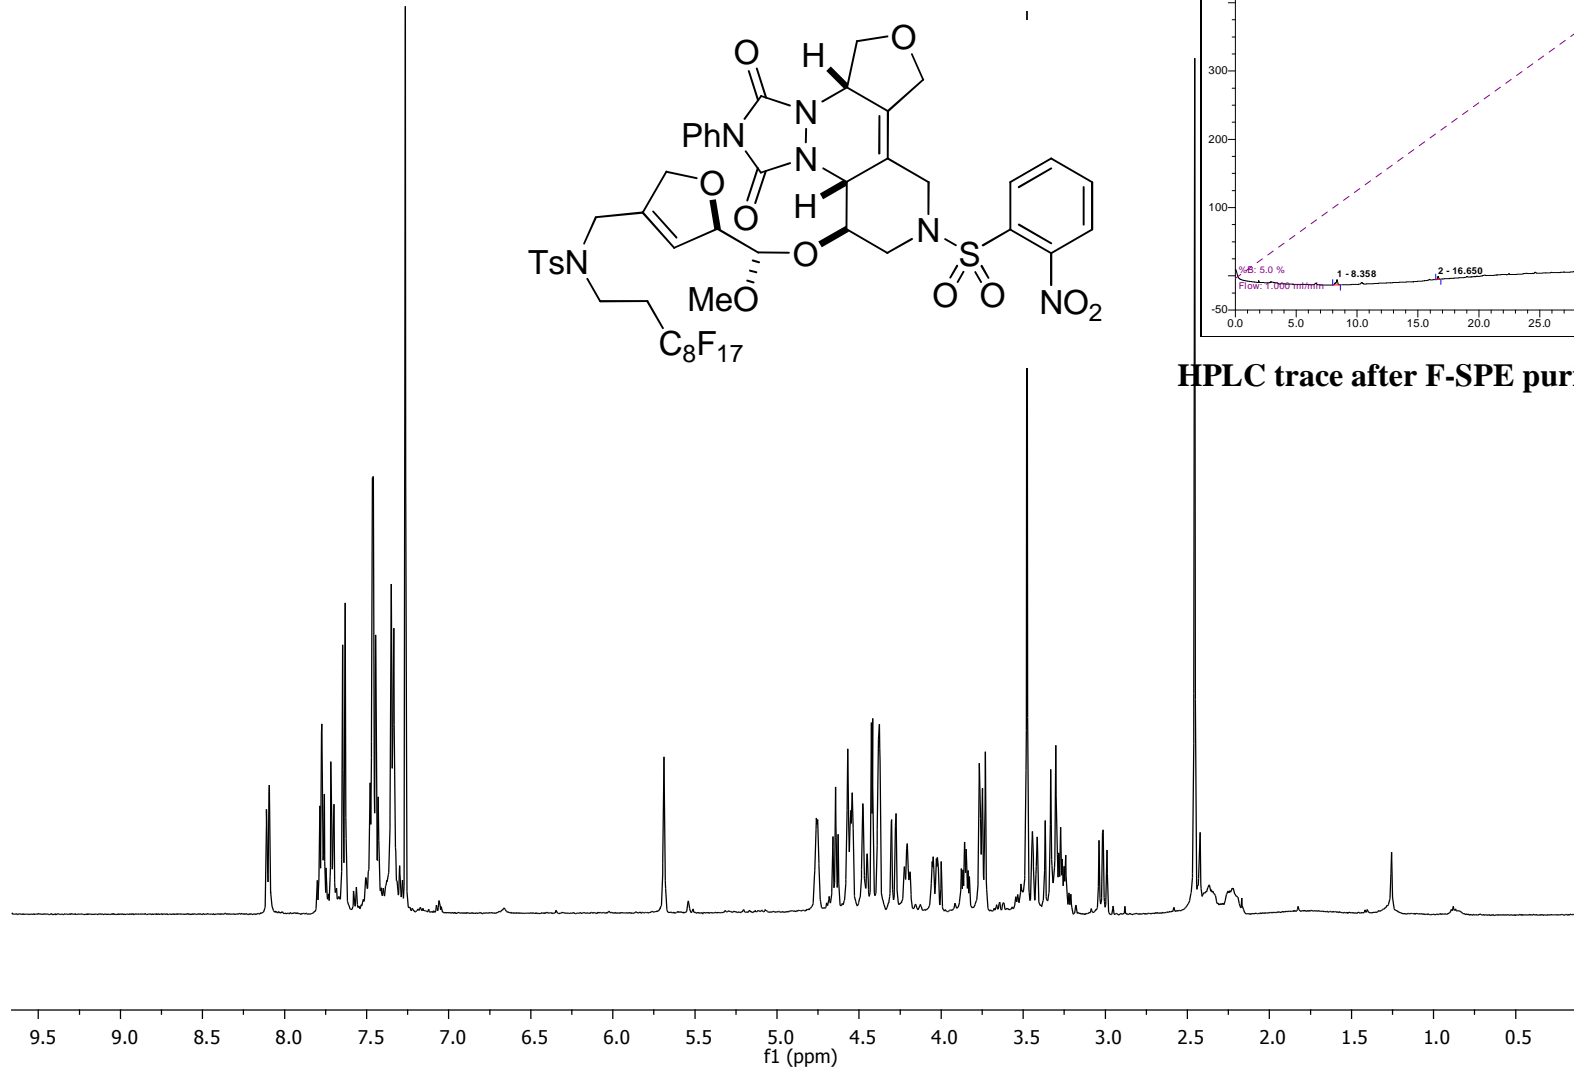

75 MHz  $^{13}\text{C}$  NMR of 36 ( $\text{R} = \text{R}'^{\text{F}}$ )

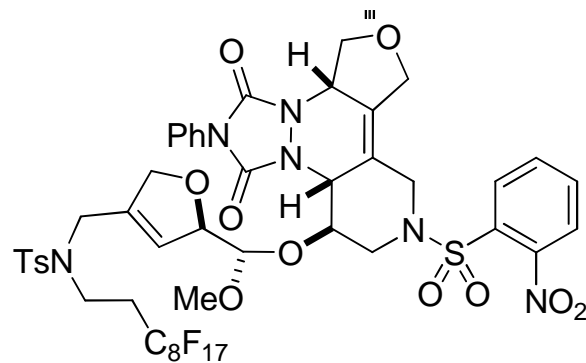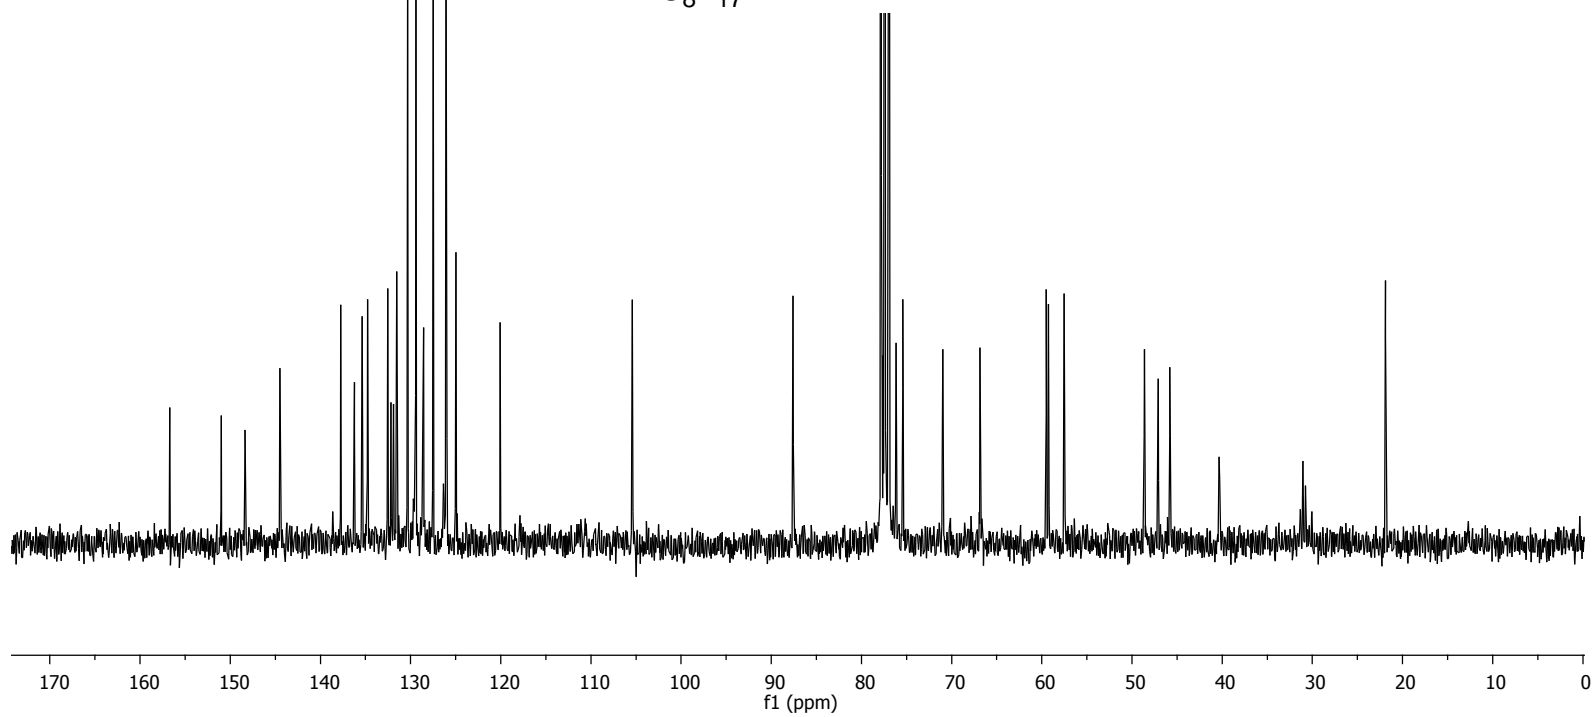



<sup>1</sup>H NMR of 36 (R = H) after F-SPE only

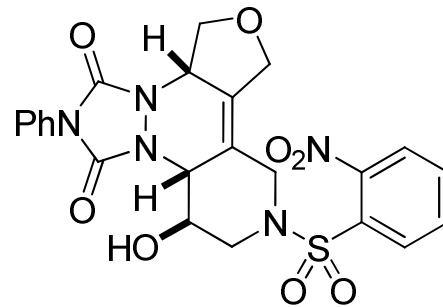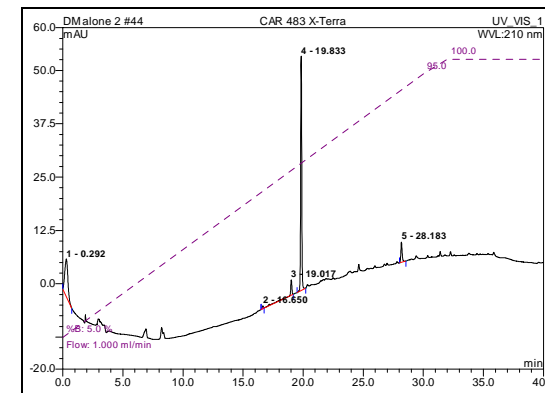

HPLC trace after F-SPE purification only

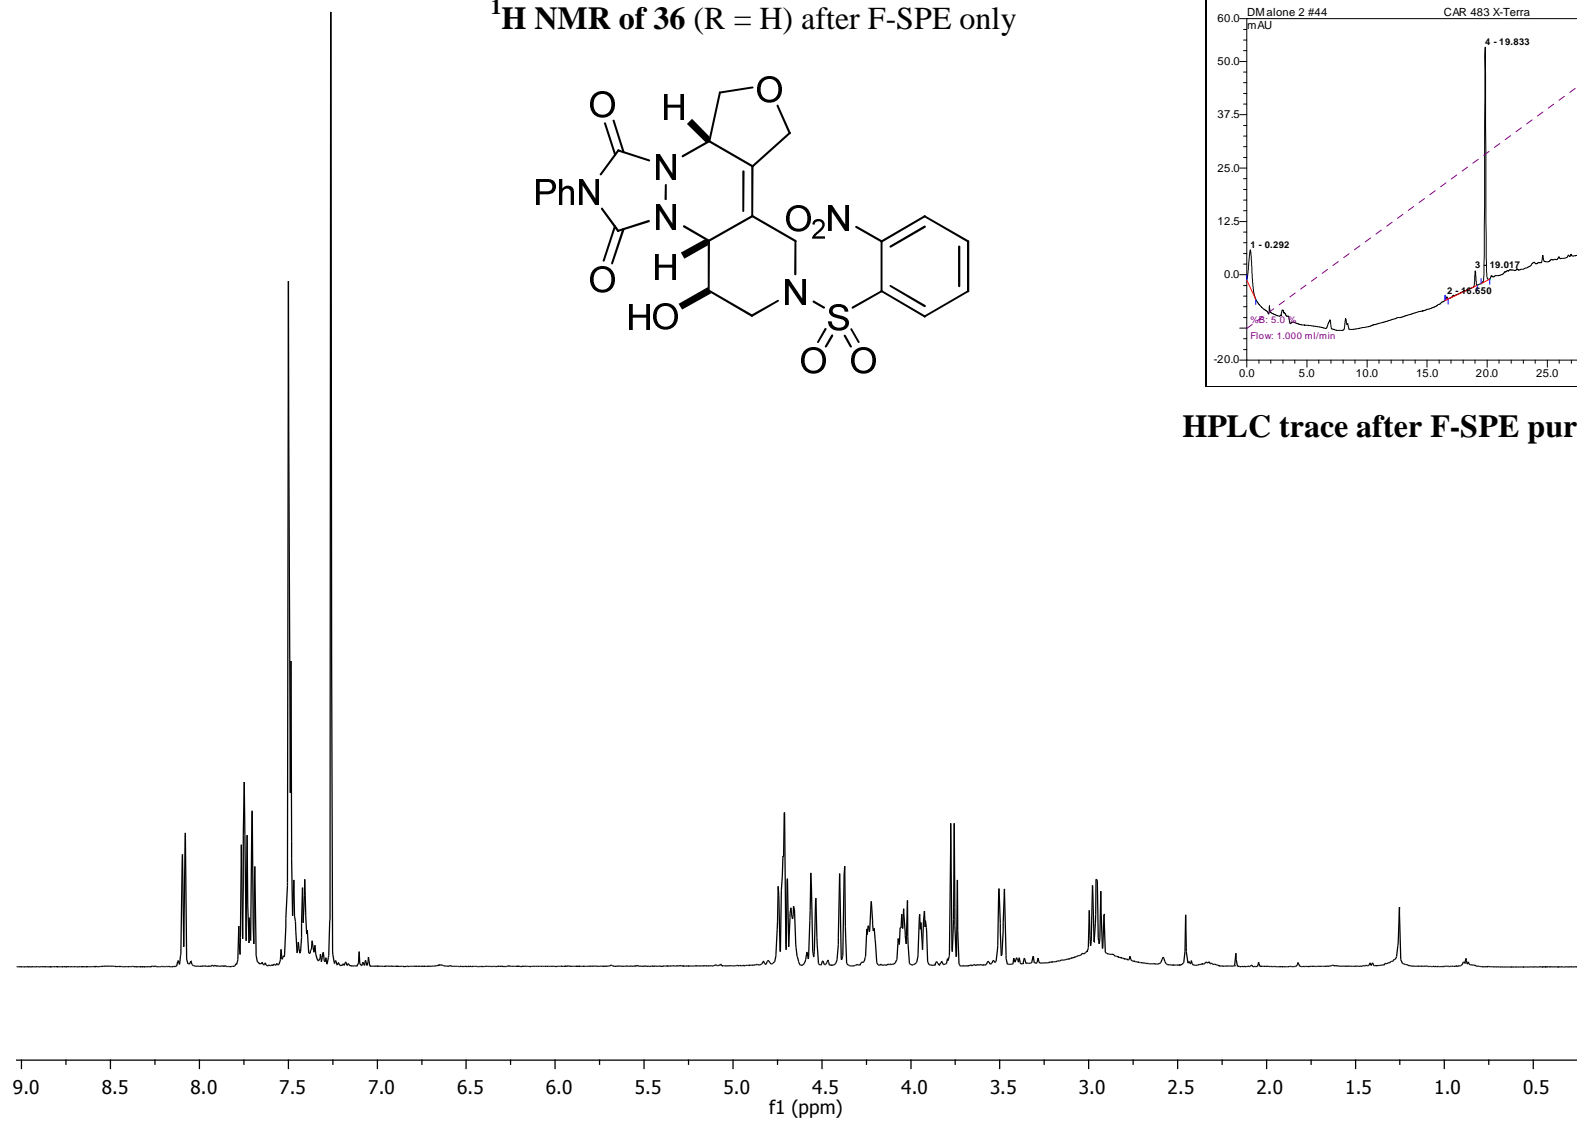

500 MHz  $^1\text{H}$  NMR of 36 (R = H)

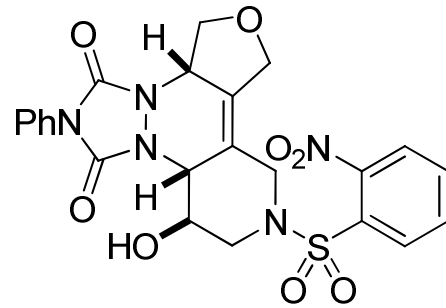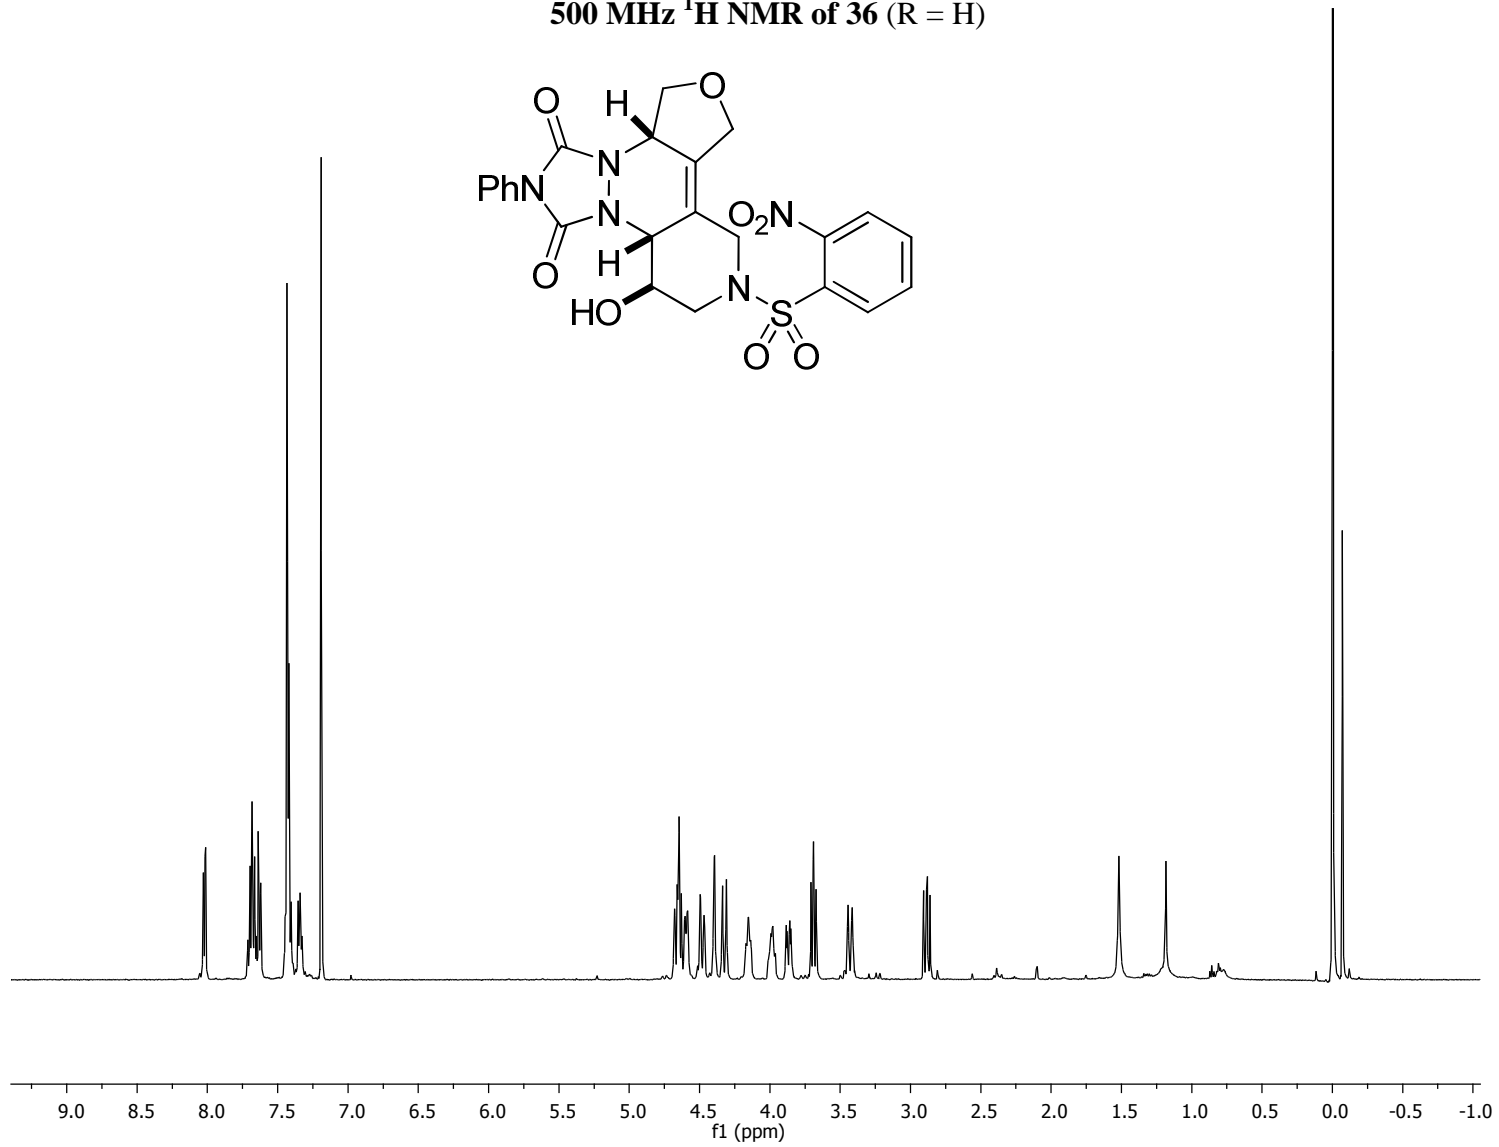

75 MHz  $^{13}\text{C}$  NMR of 36 (R = H)

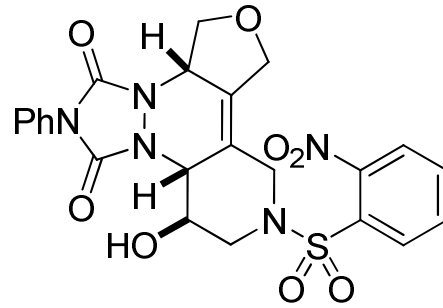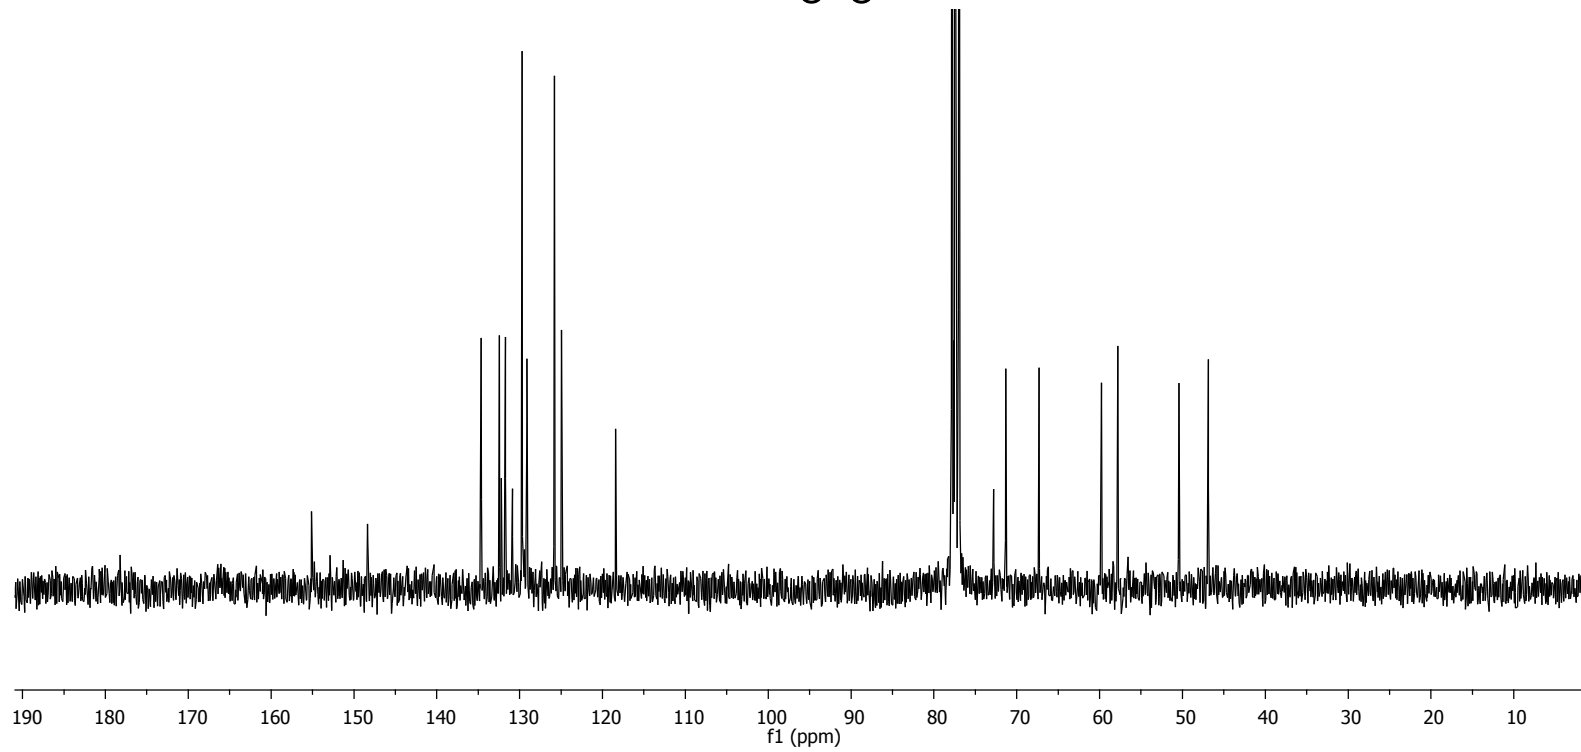

**$^1\text{H}$  NMR of 37 ( $\text{R} = \text{R}'^{\text{F}}$ ) (F-SPE purified only)**

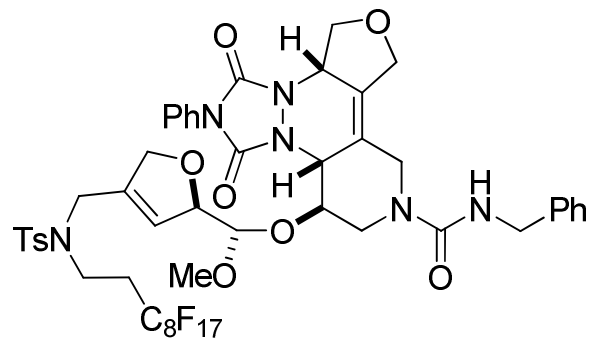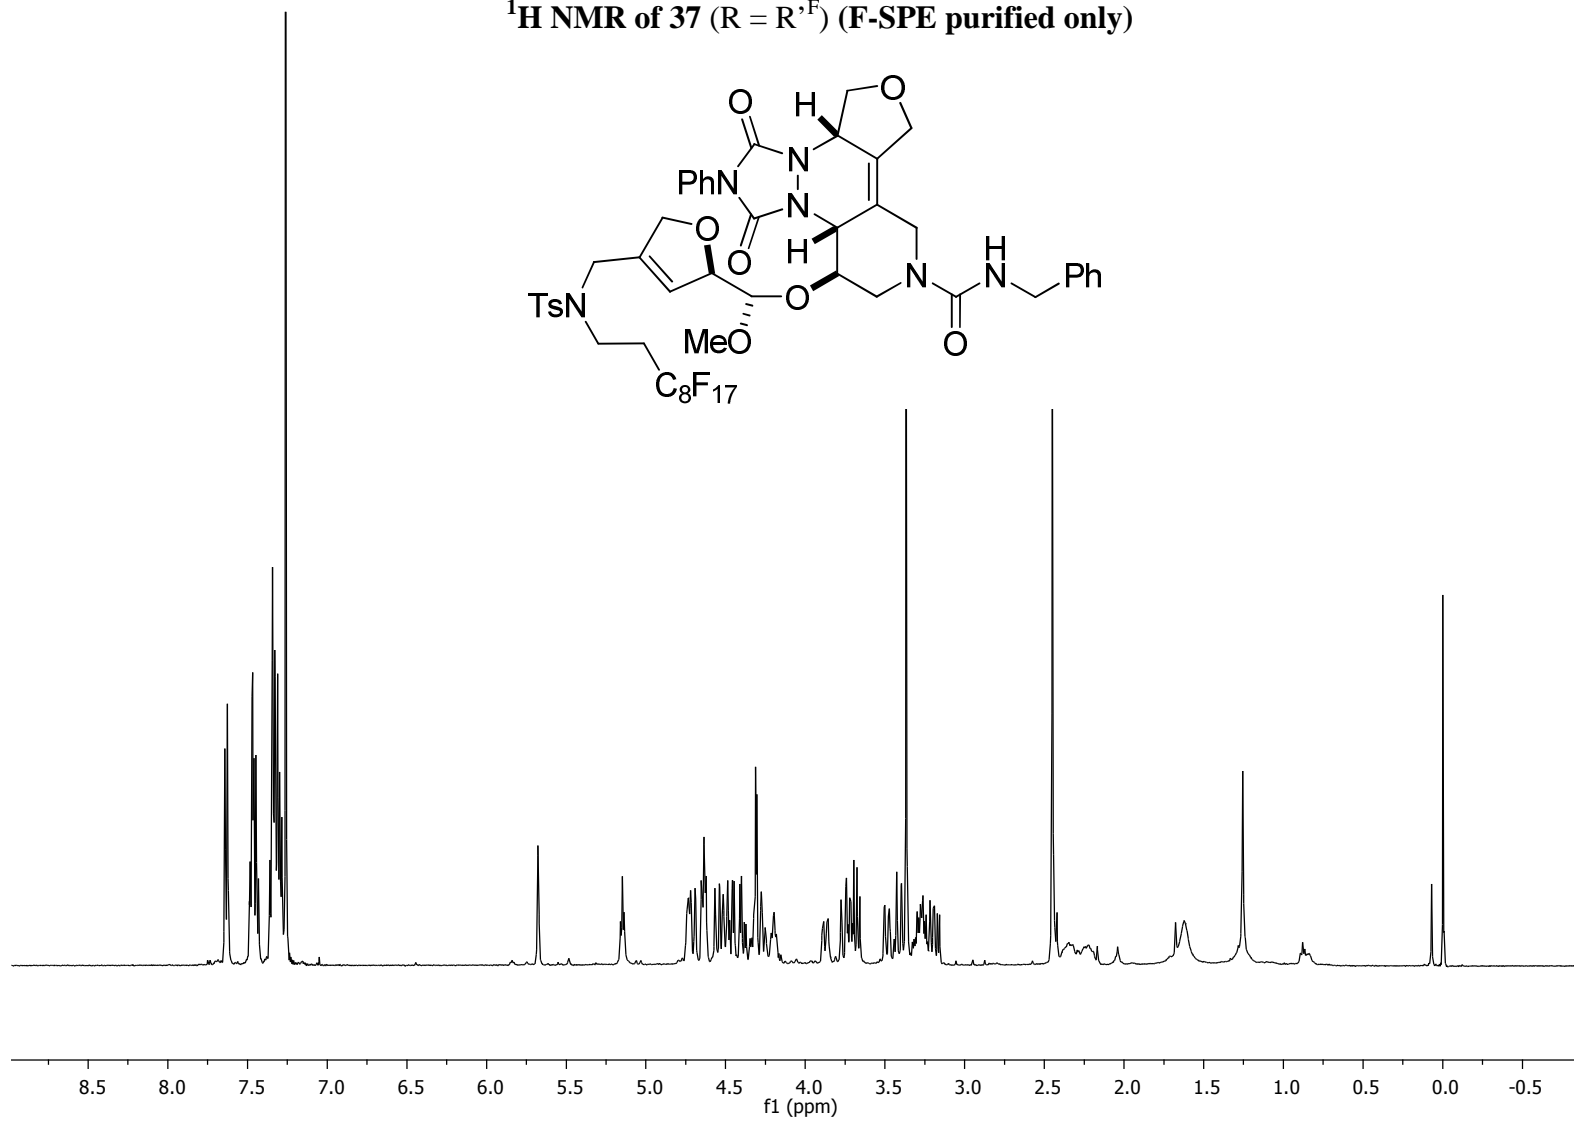

75 MHz  $^{13}\text{C}$  NMR of 37 ( $\text{R} = \text{R}'^{\text{F}}$ )

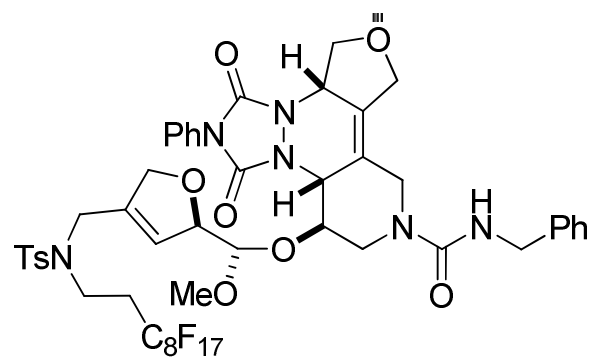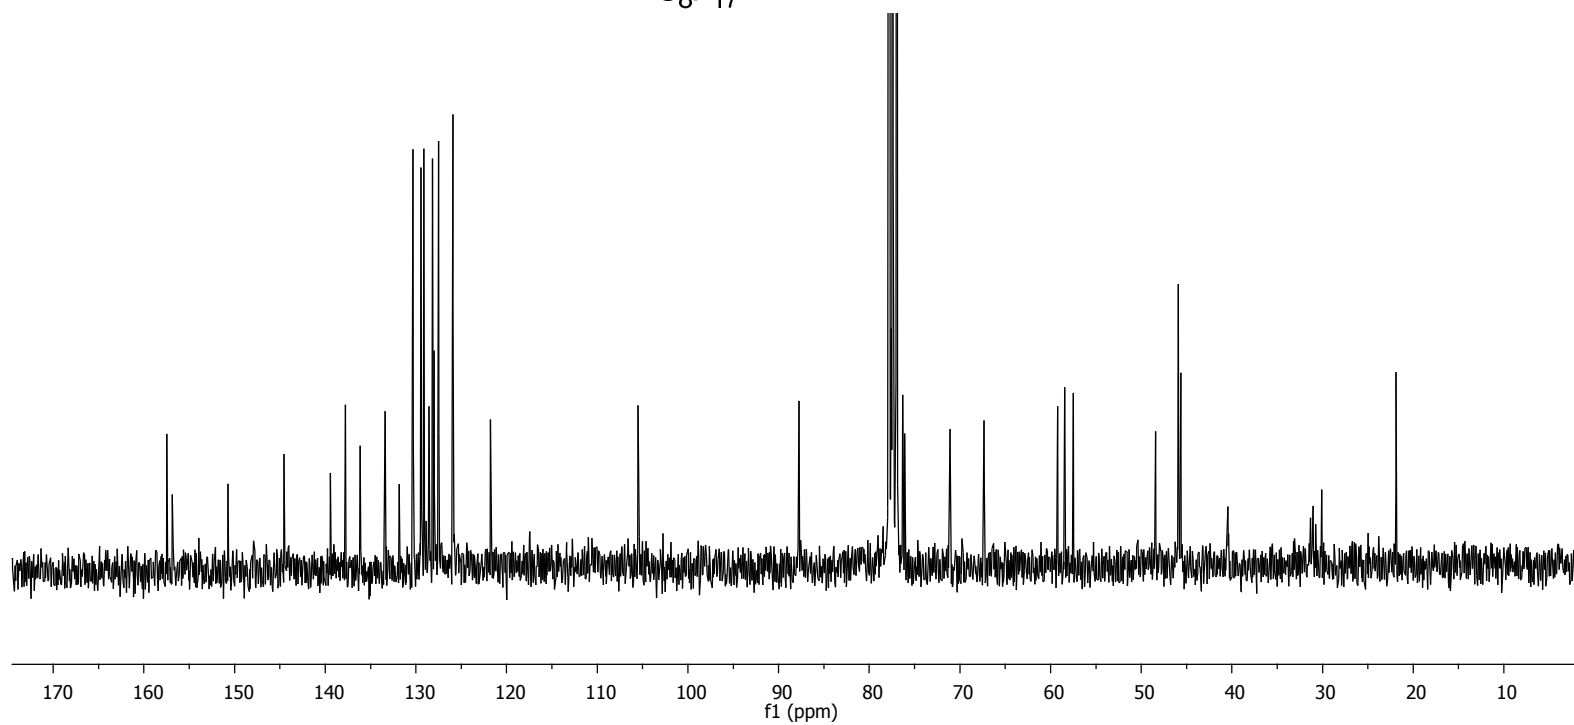

<sup>1</sup>H NMR of 37 (R = H) (after F-SPE only)

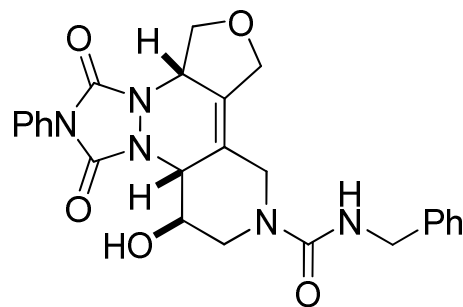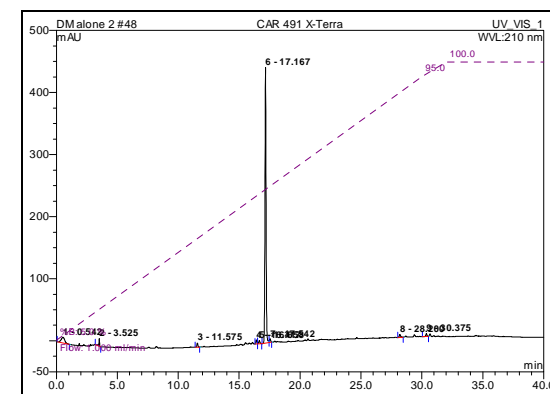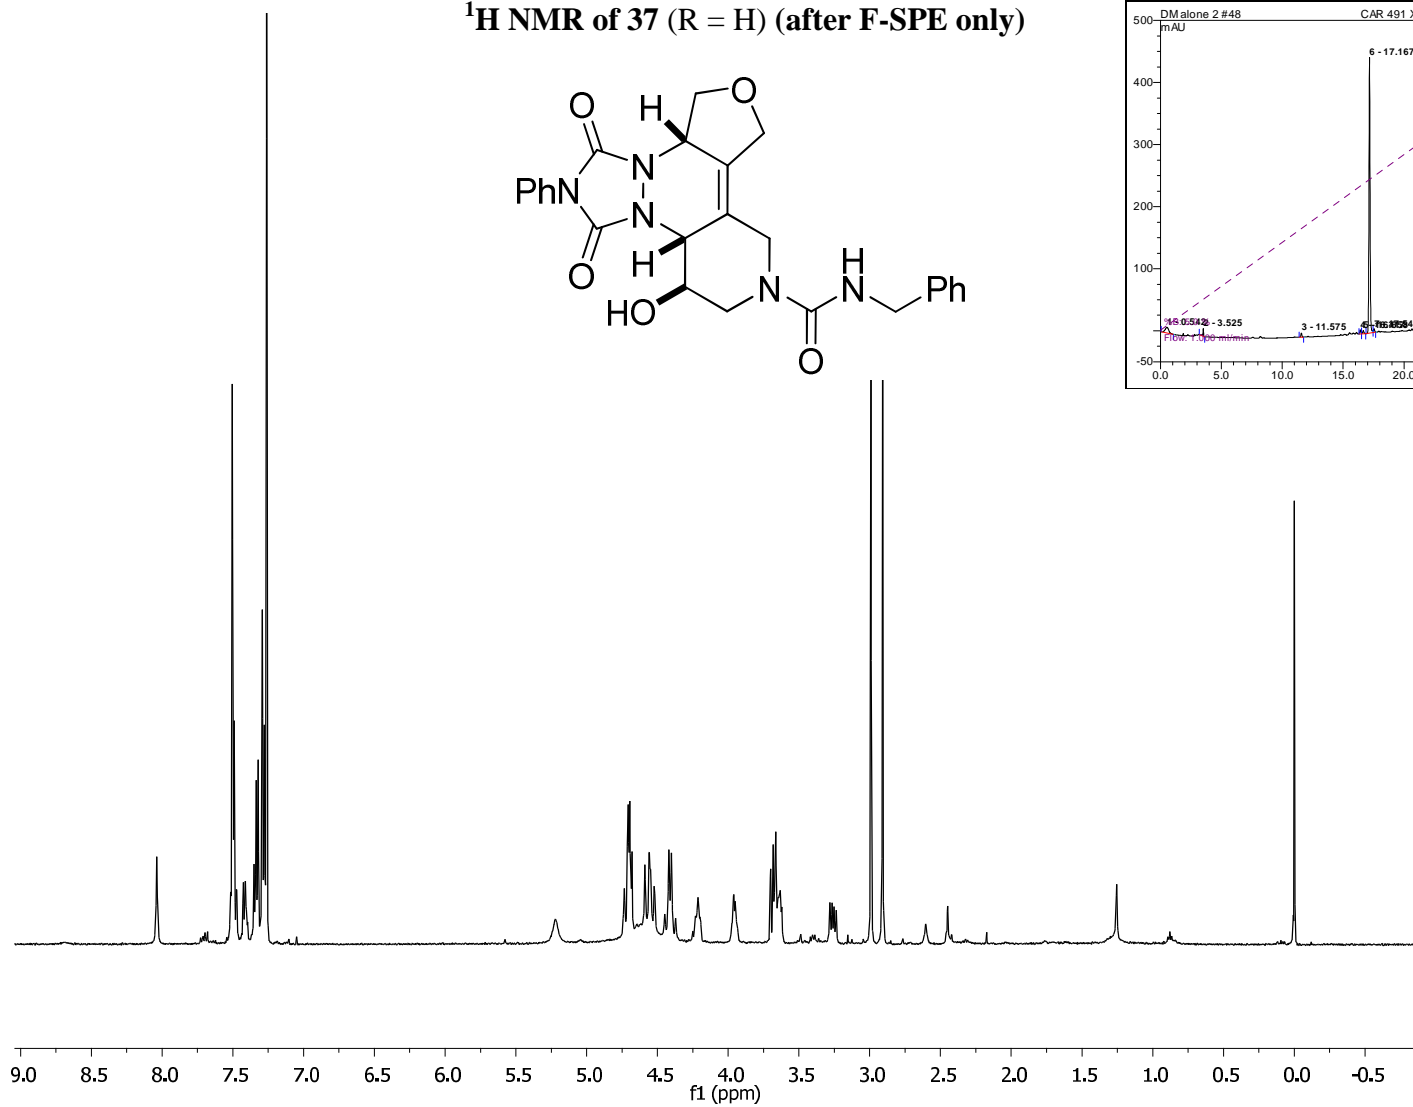

500 MHz  $^1\text{H}$  NMR of 37 (R = H)

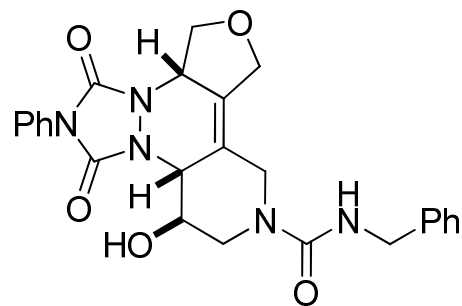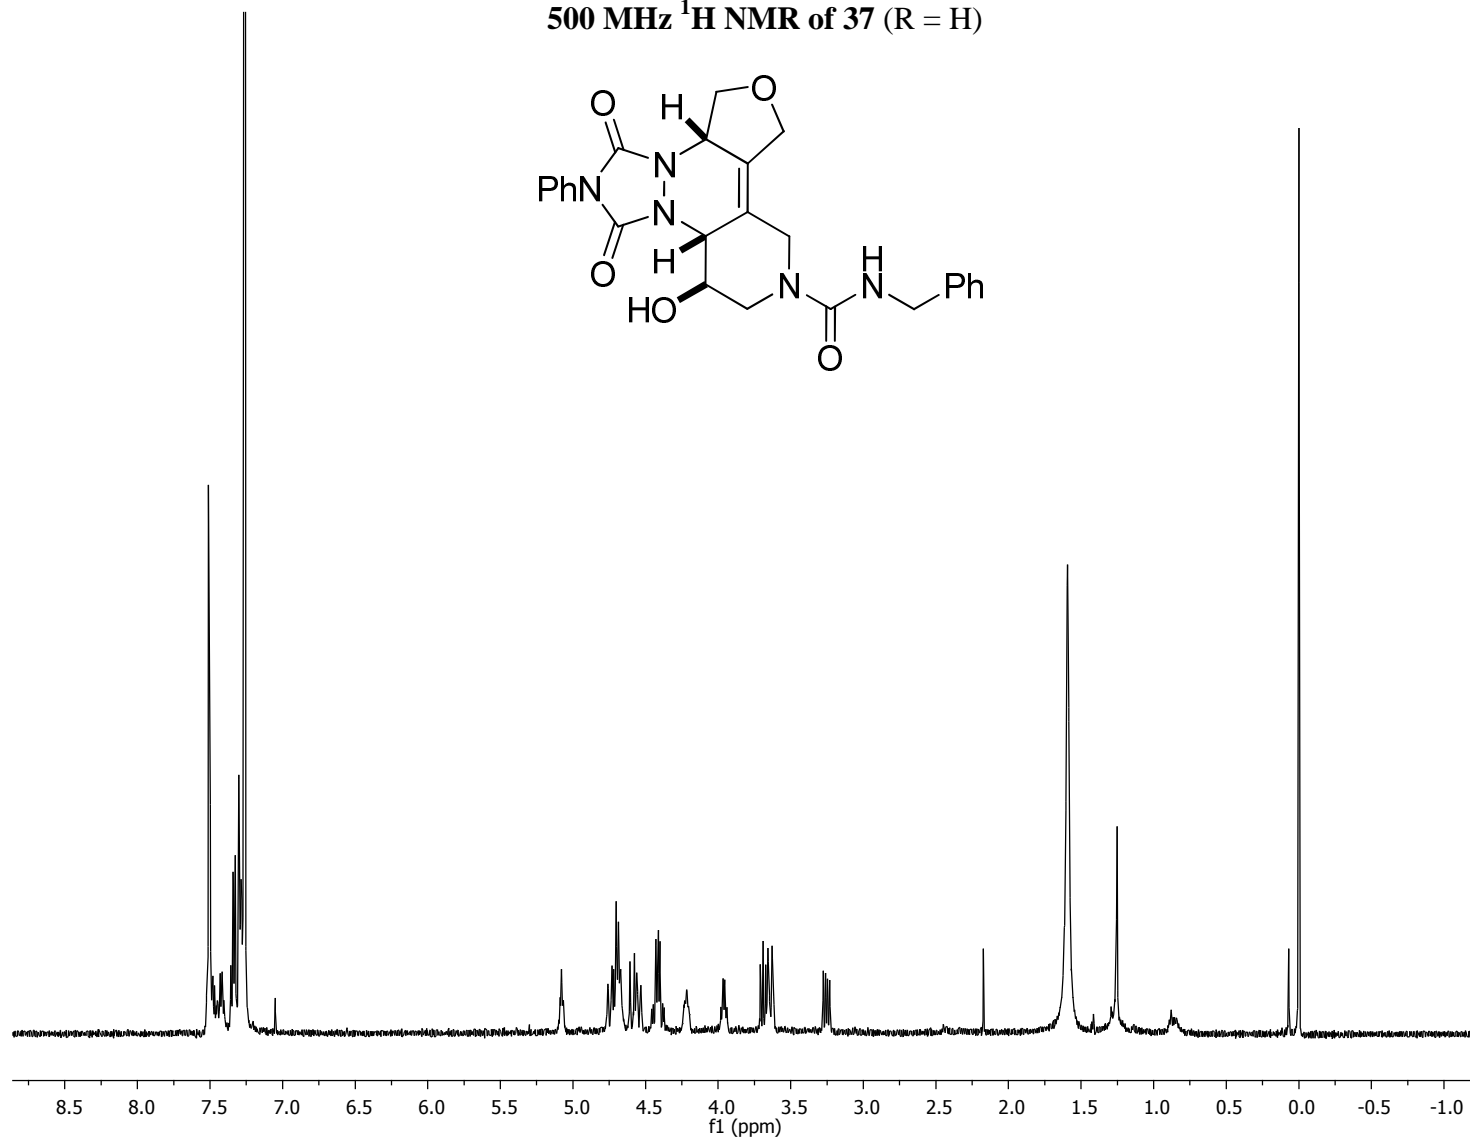

75 MHz  $^{13}\text{C}$  NMR of 37 (R = H)

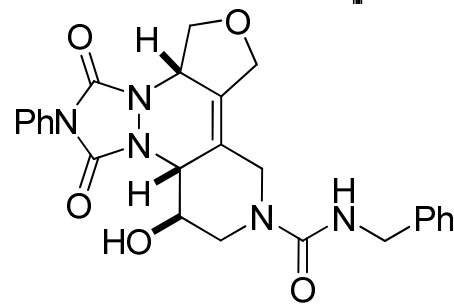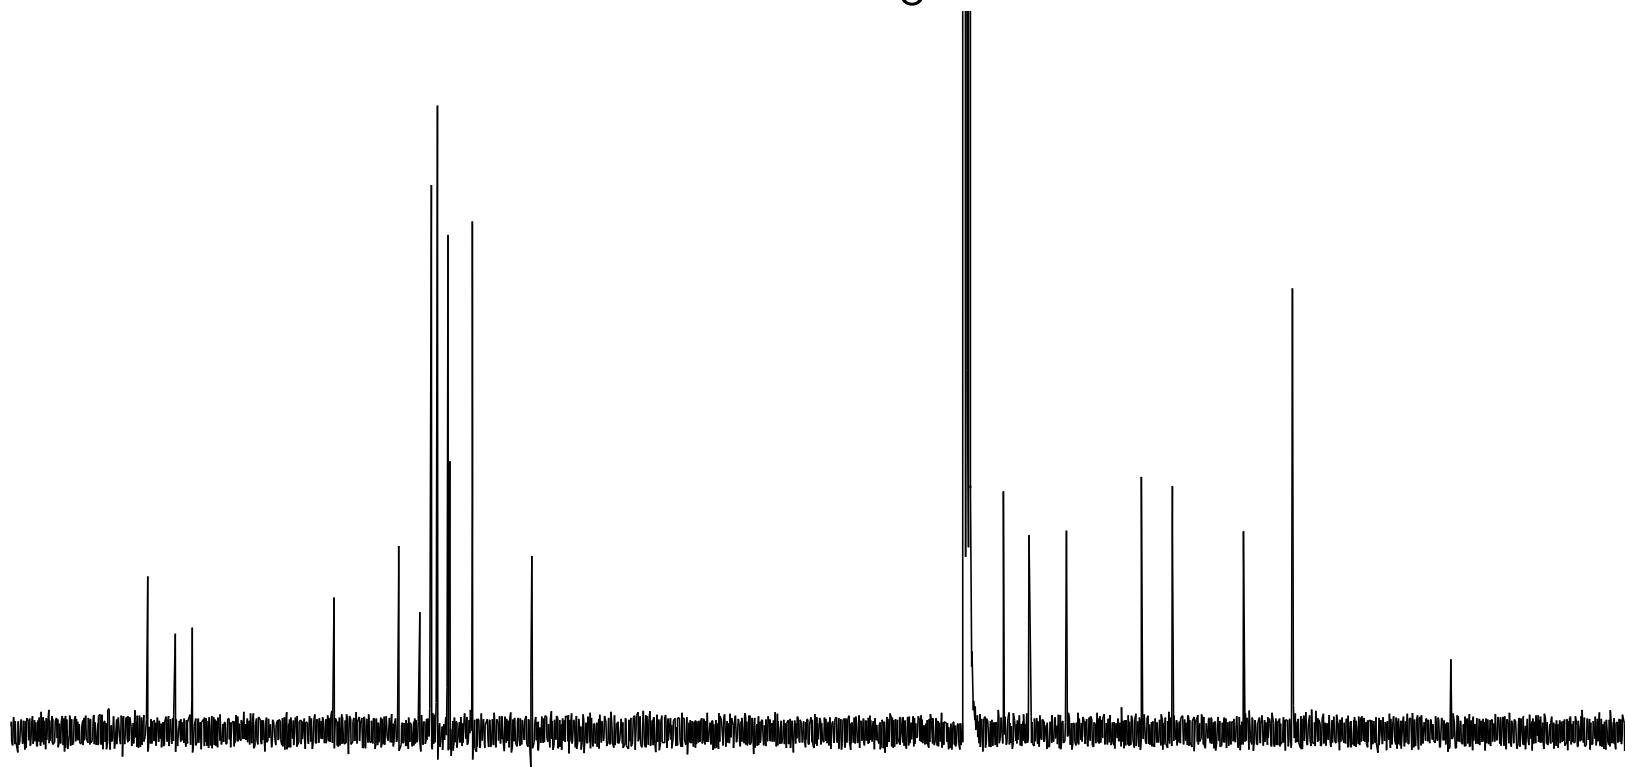



500 MHz  $^1\text{H}$  NMR of 10

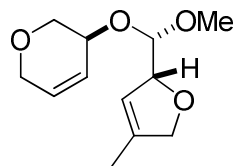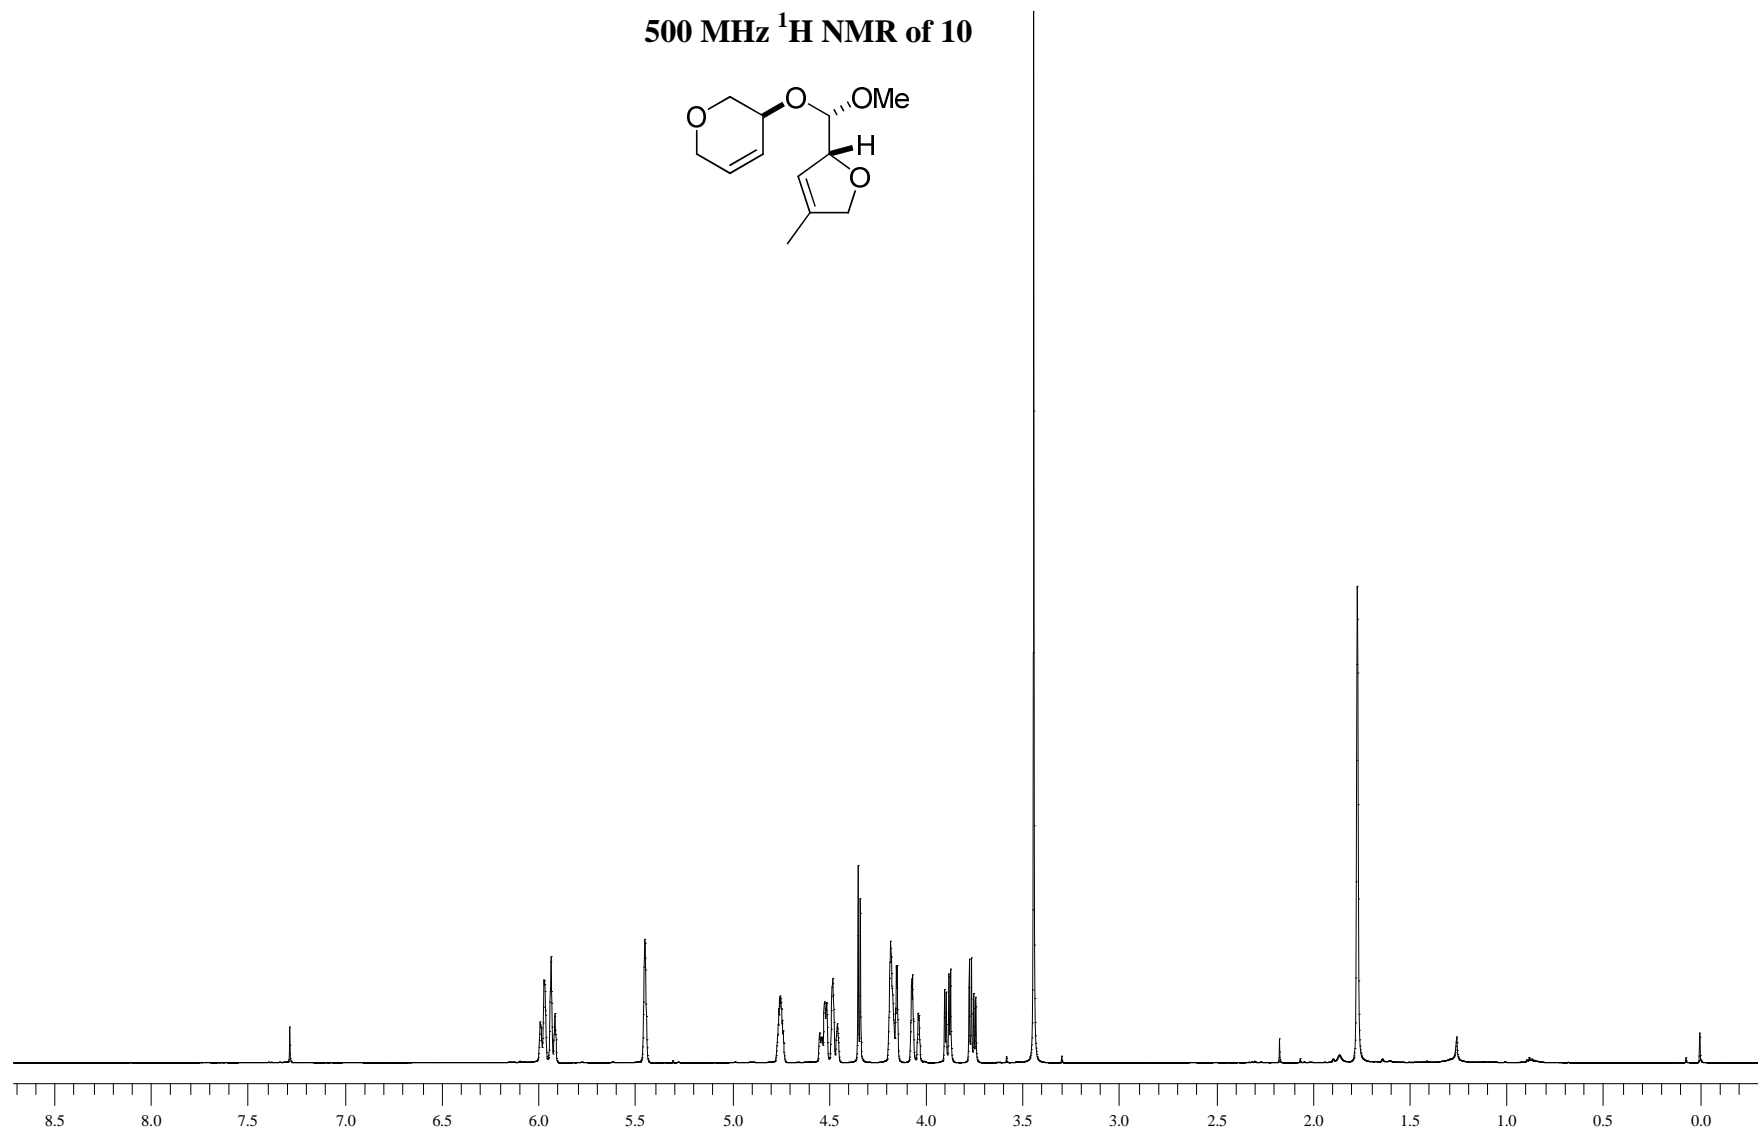

75 MHz  $^{13}\text{C}$  NMR of 10

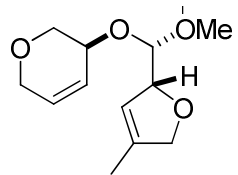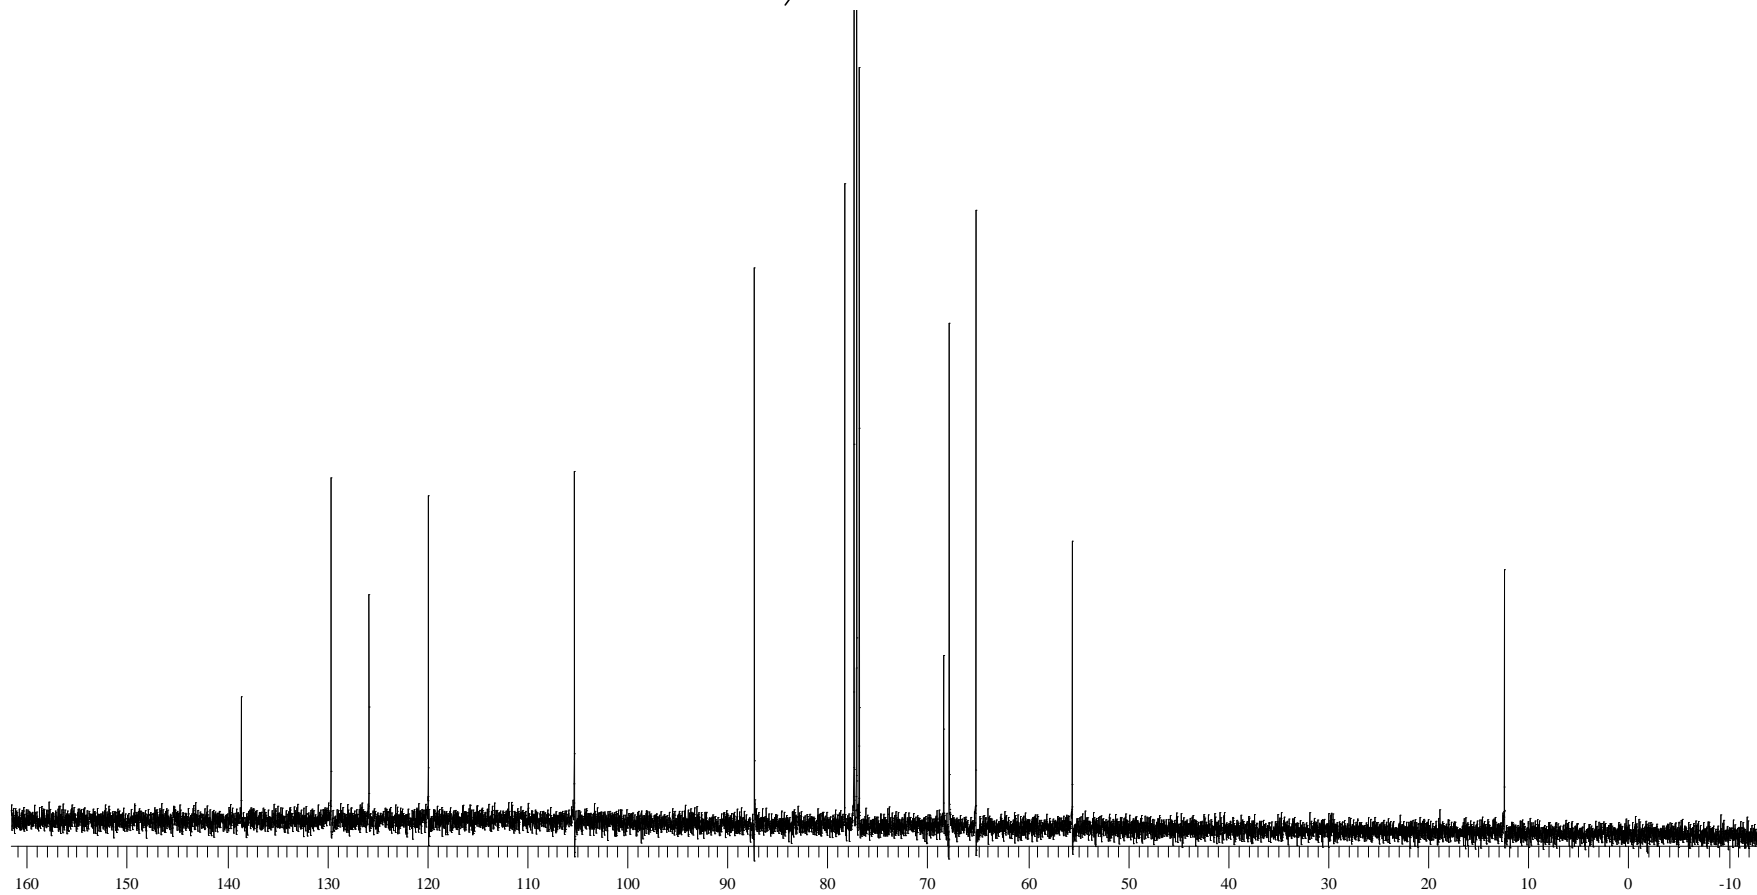

500 MHz  $^1\text{H}$  NMR of 11

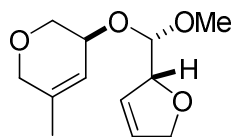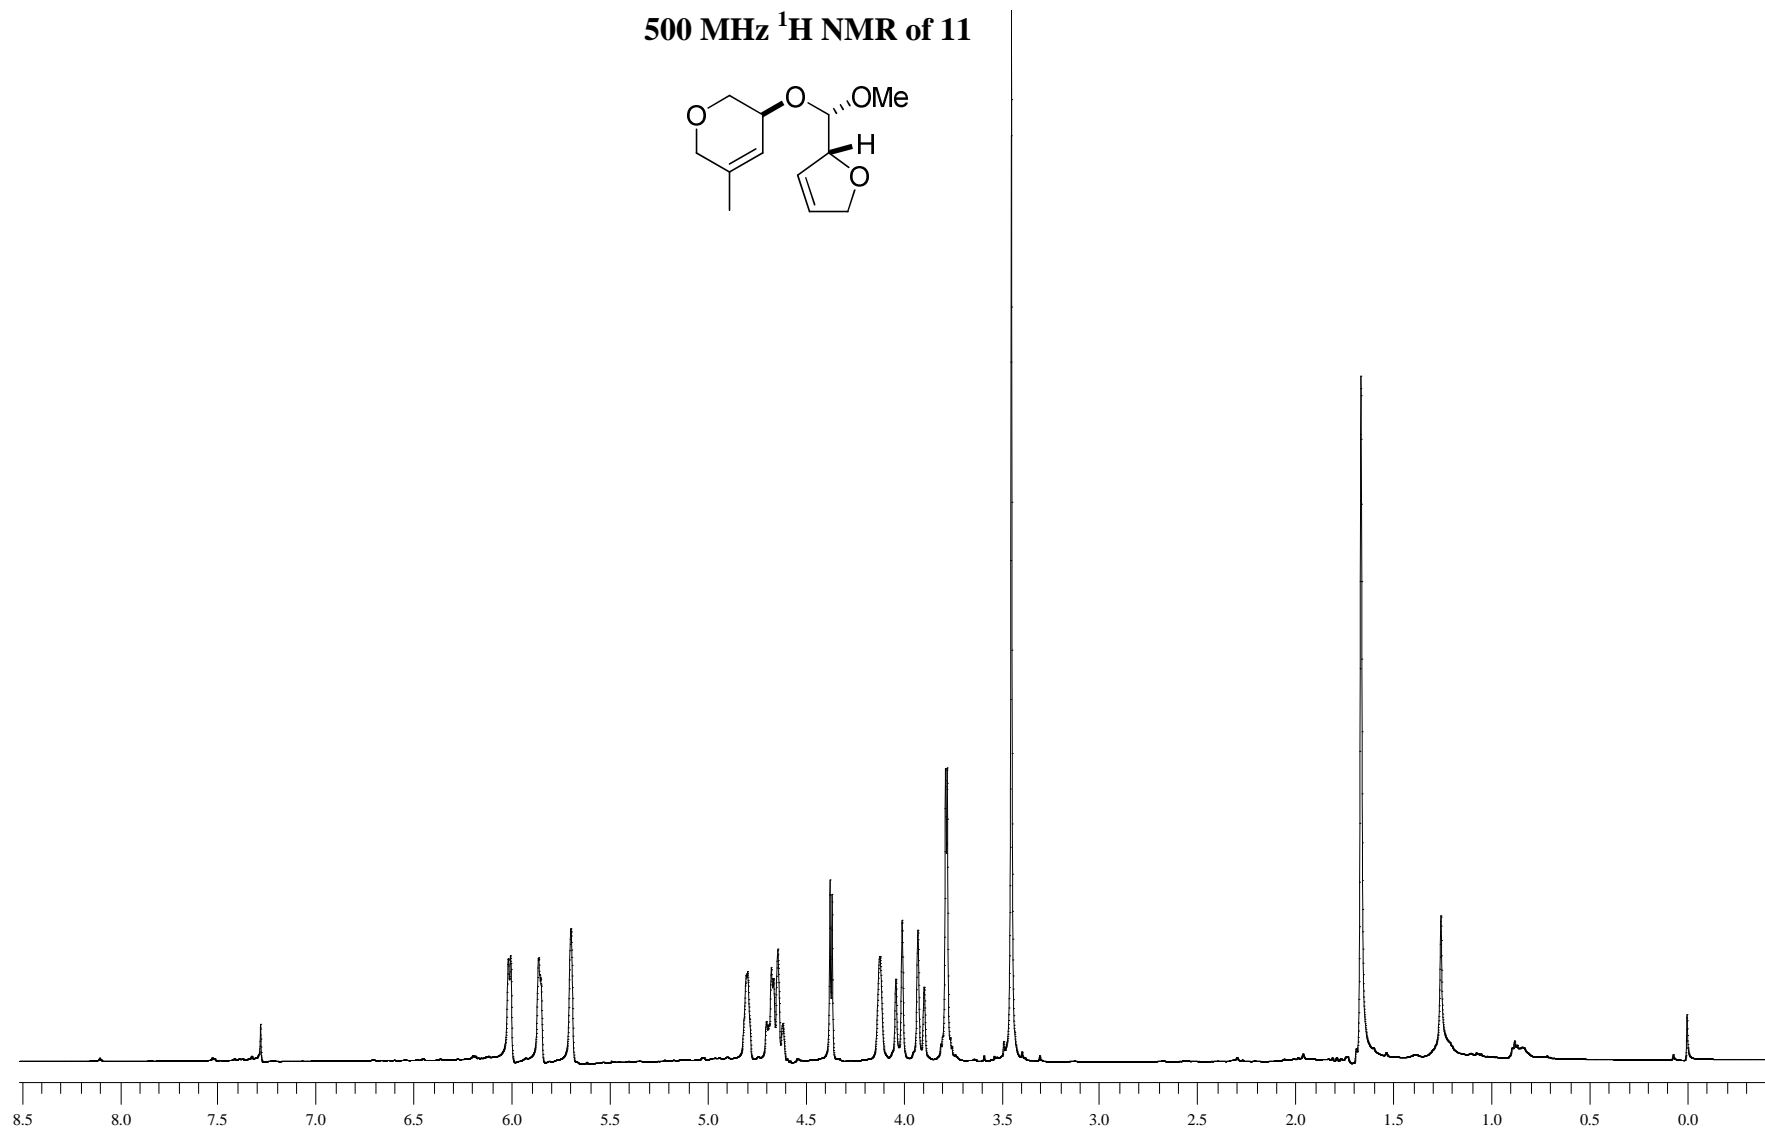

75 MHz  $^{13}\text{C}$  NMR of 11

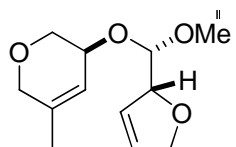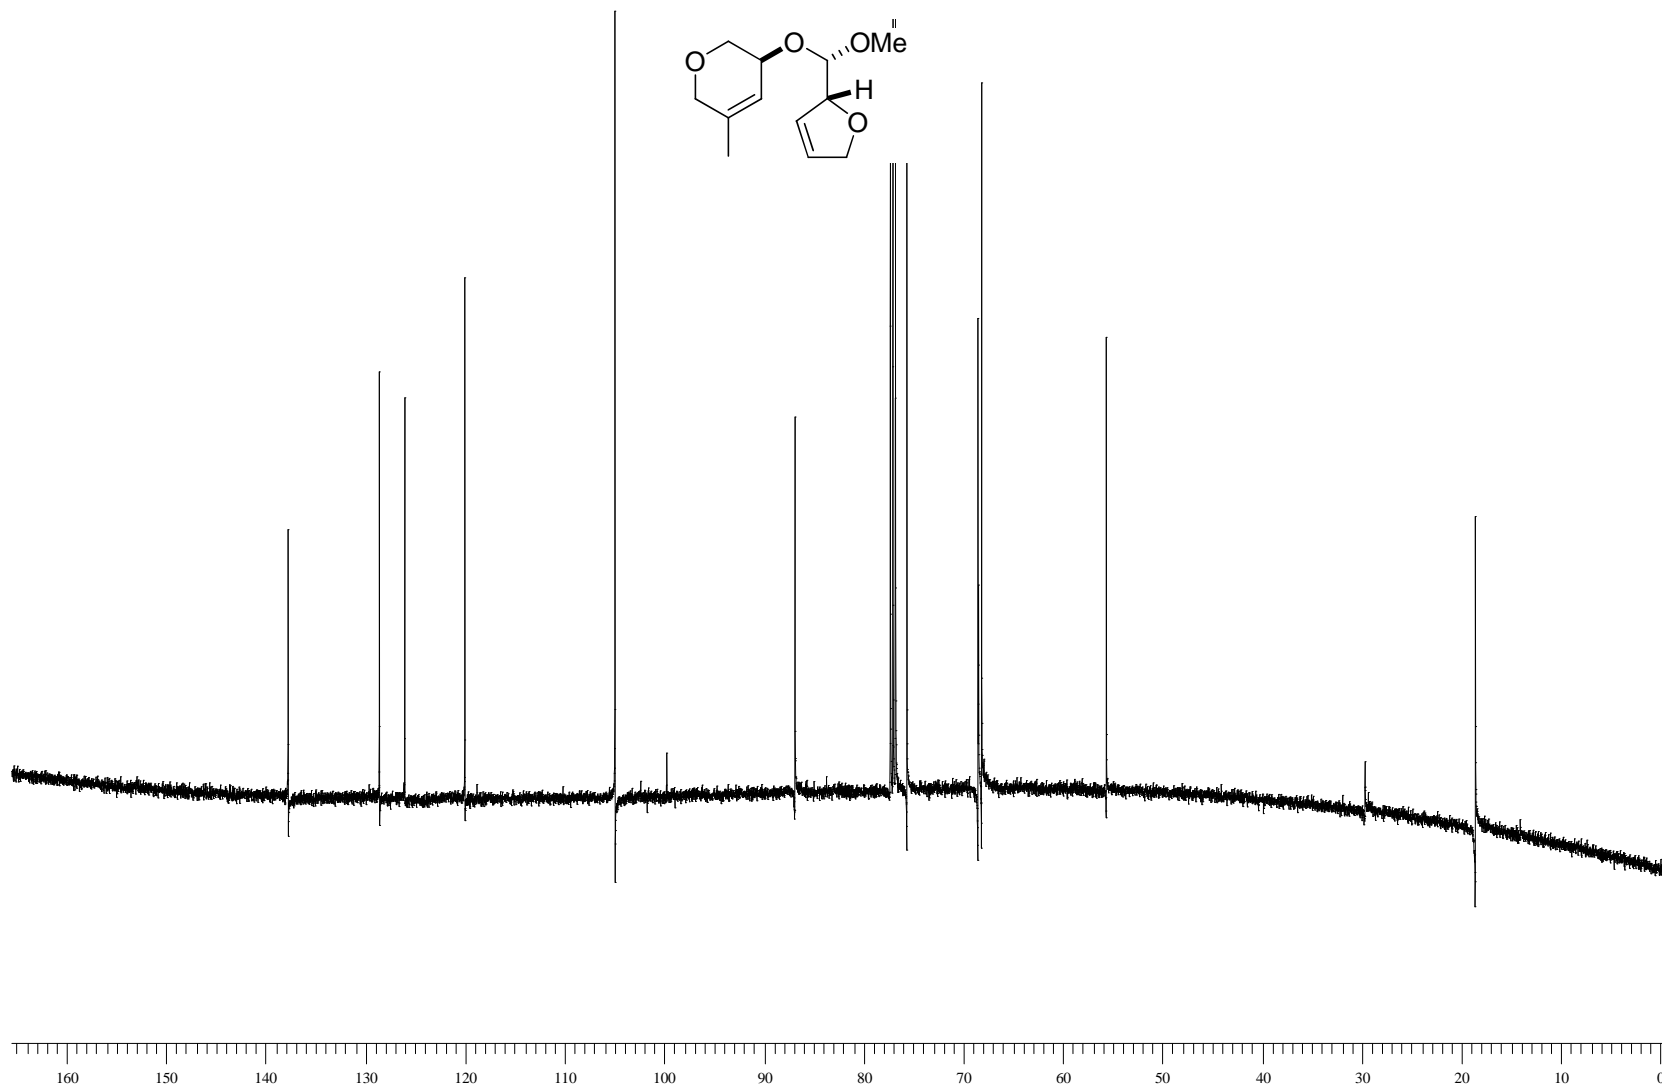

500 MHz  $^1\text{H}$  NMR of S14

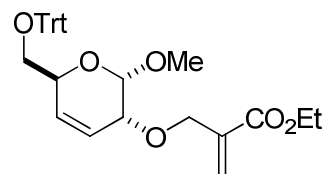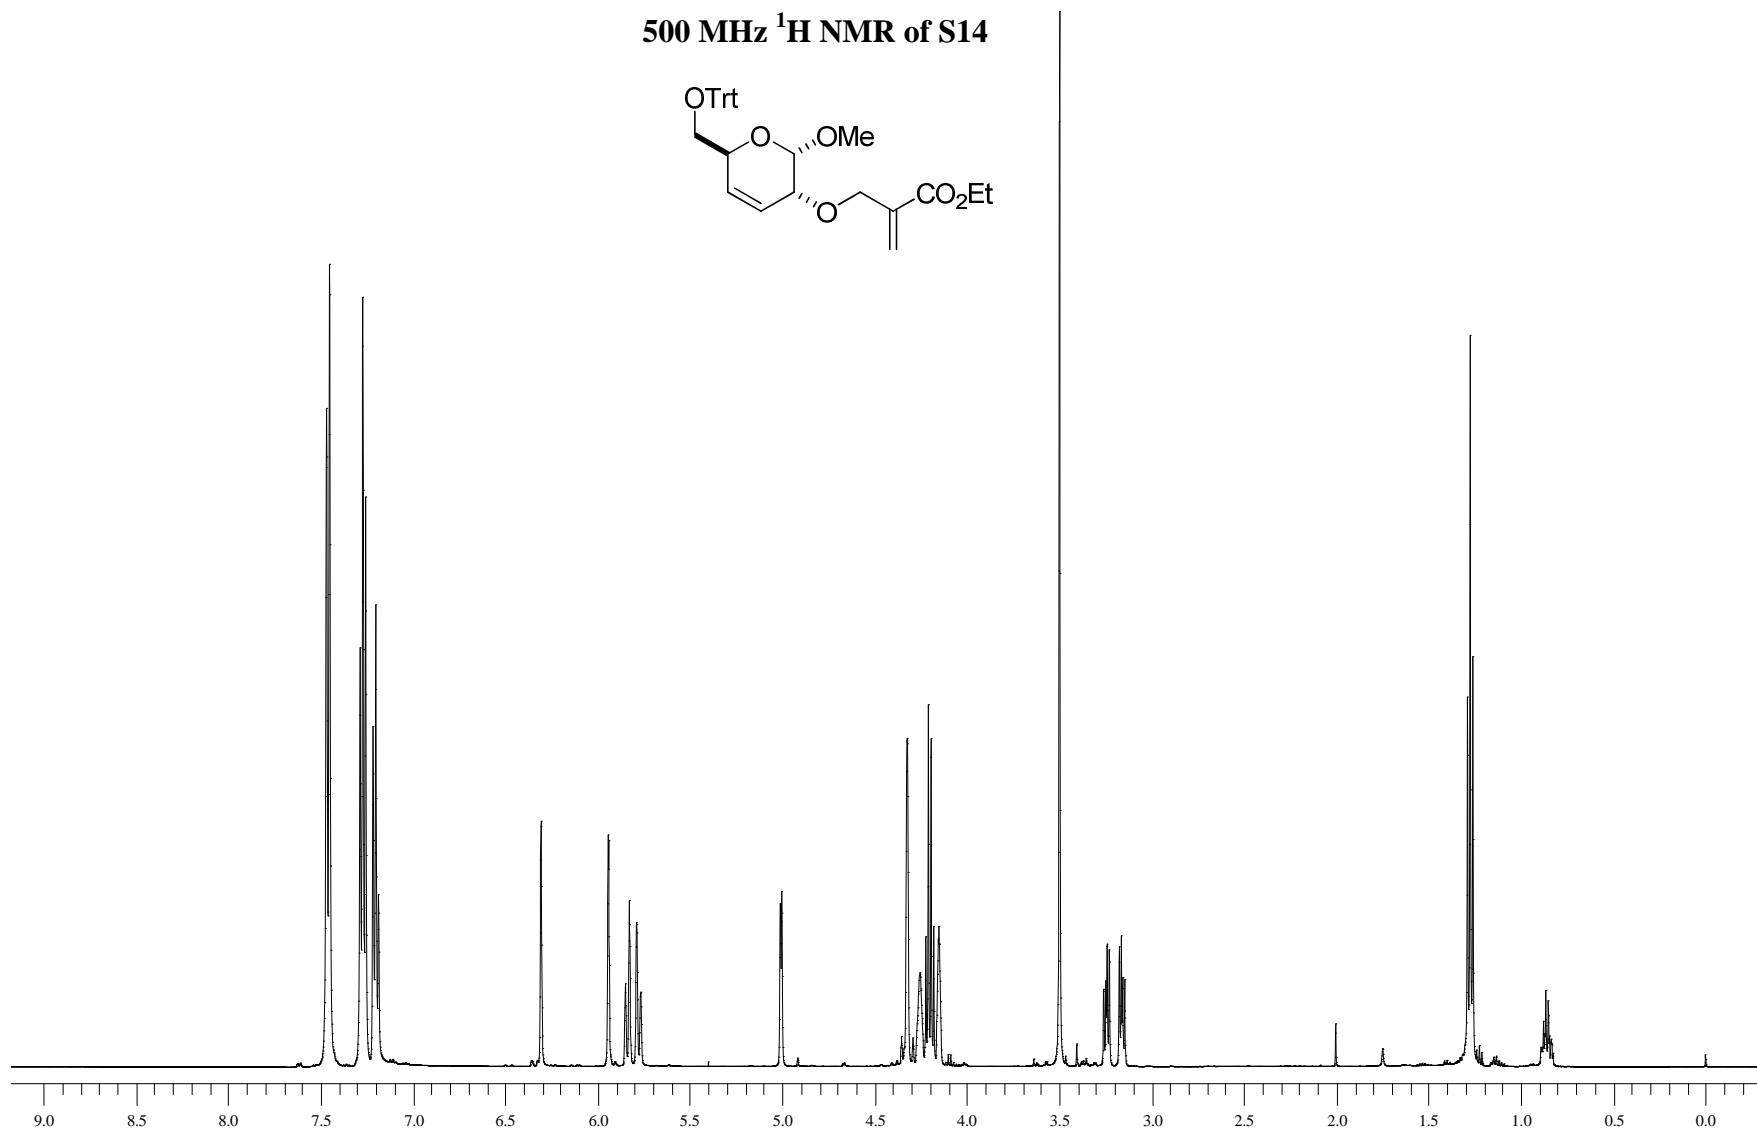

75 MHz  $^{13}\text{C}$  NMR of S14

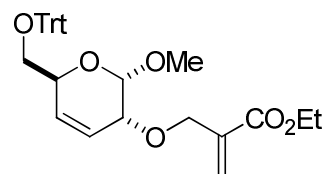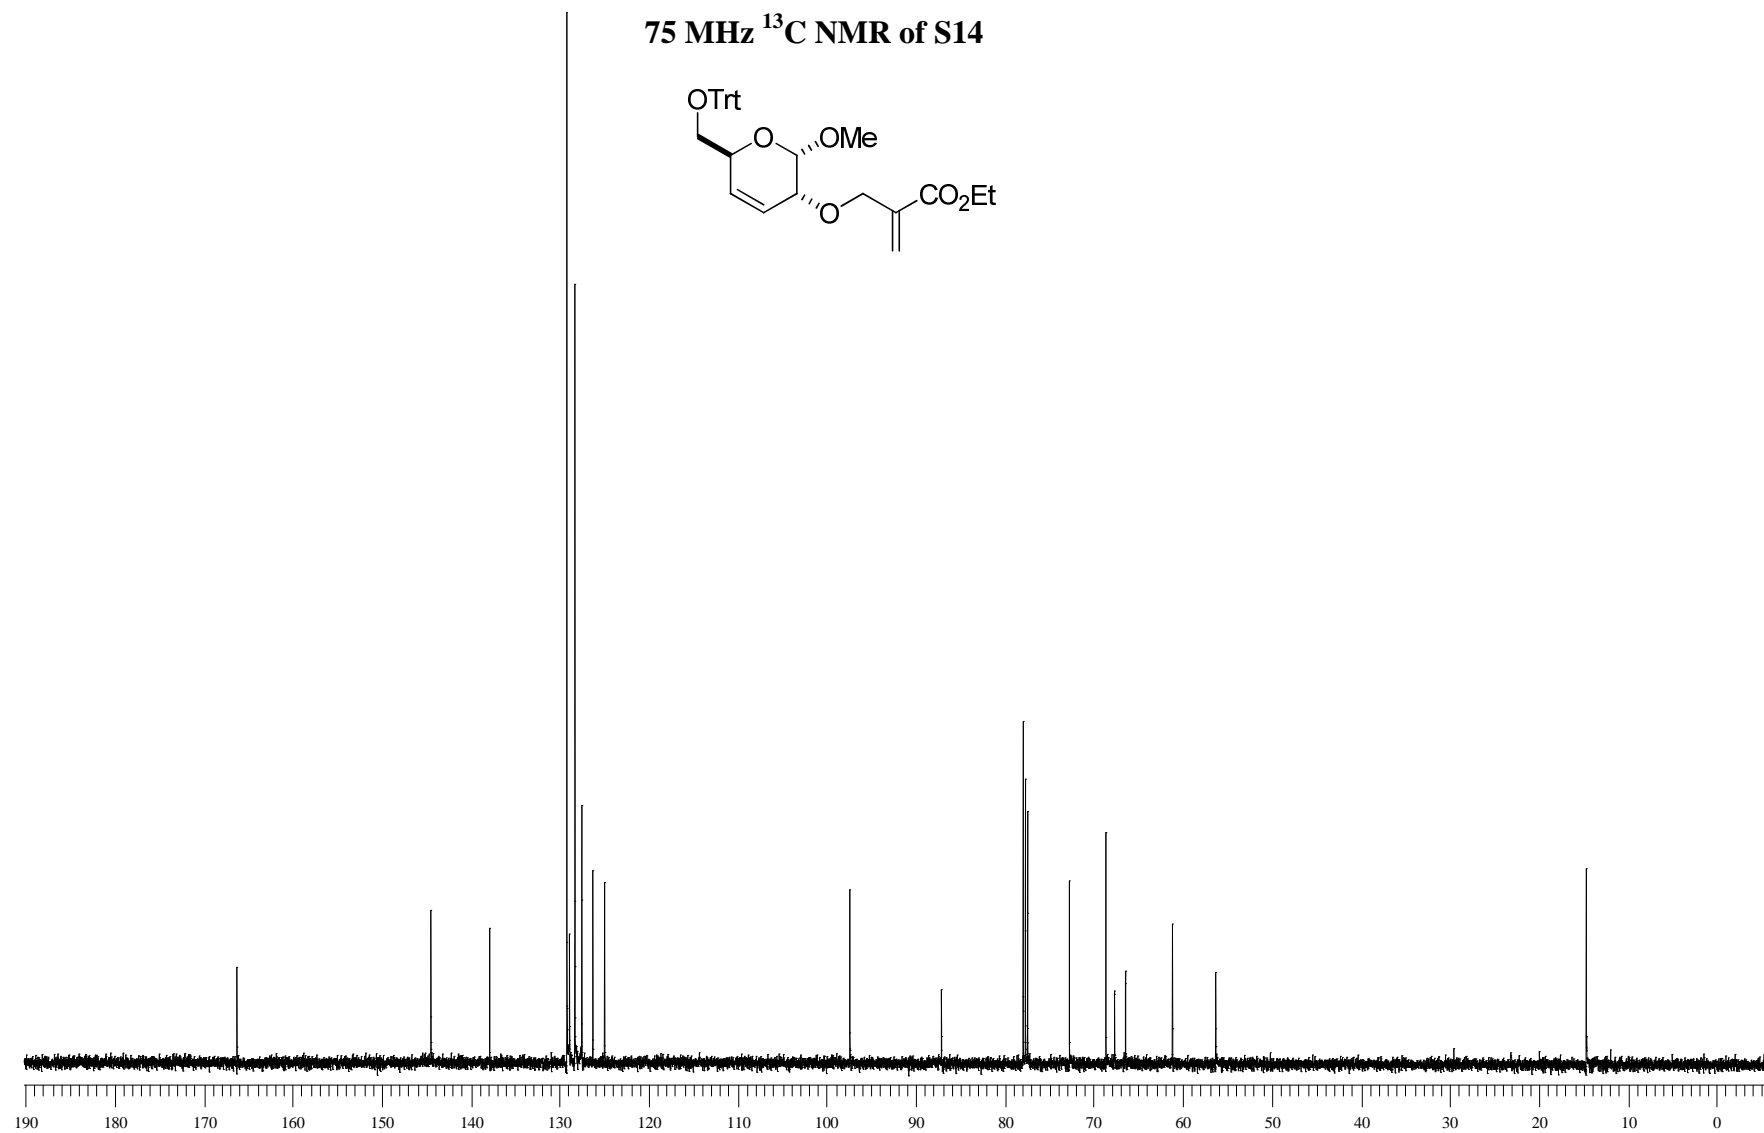

500 MHz  $^1\text{H}$  NMR of 13

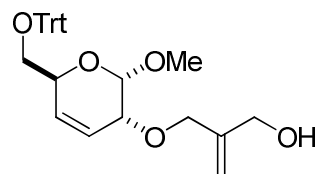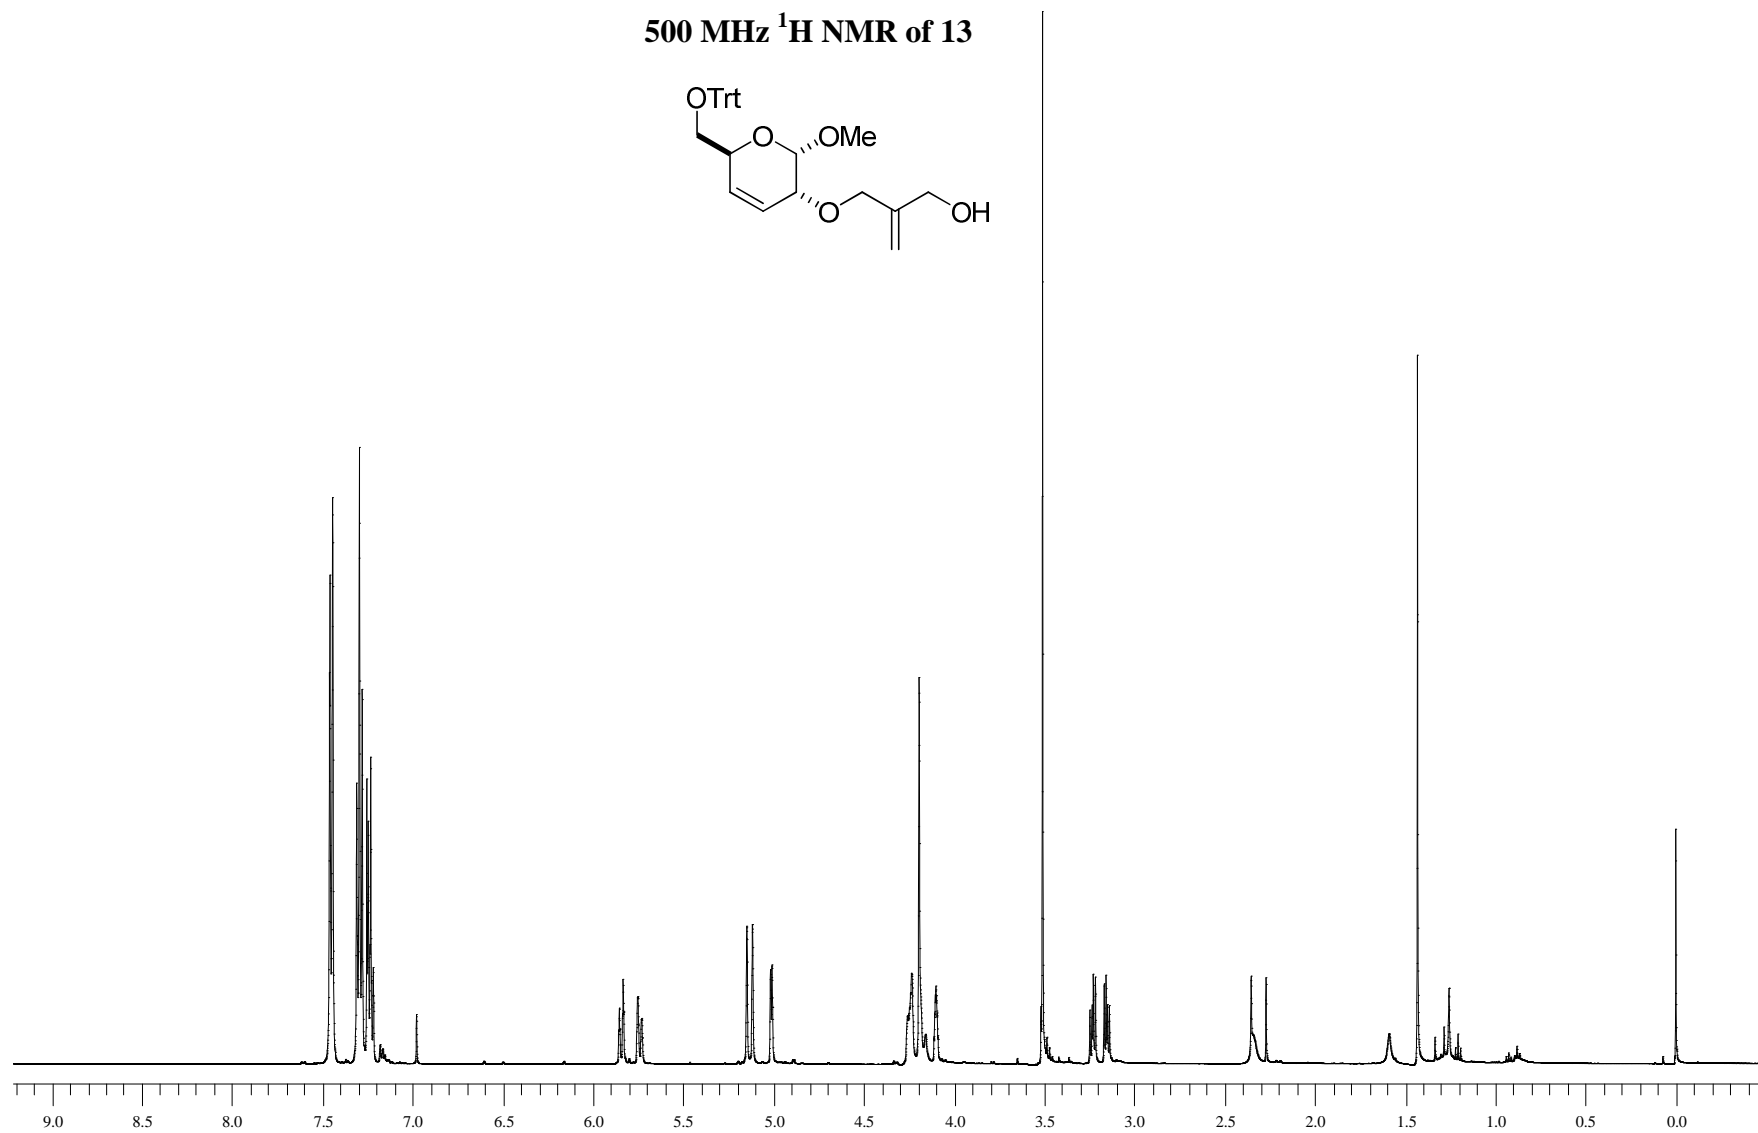

75 MHz  $^{13}\text{C}$  NMR of 13

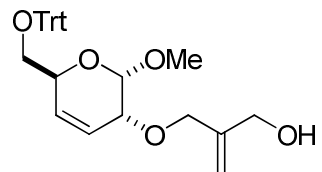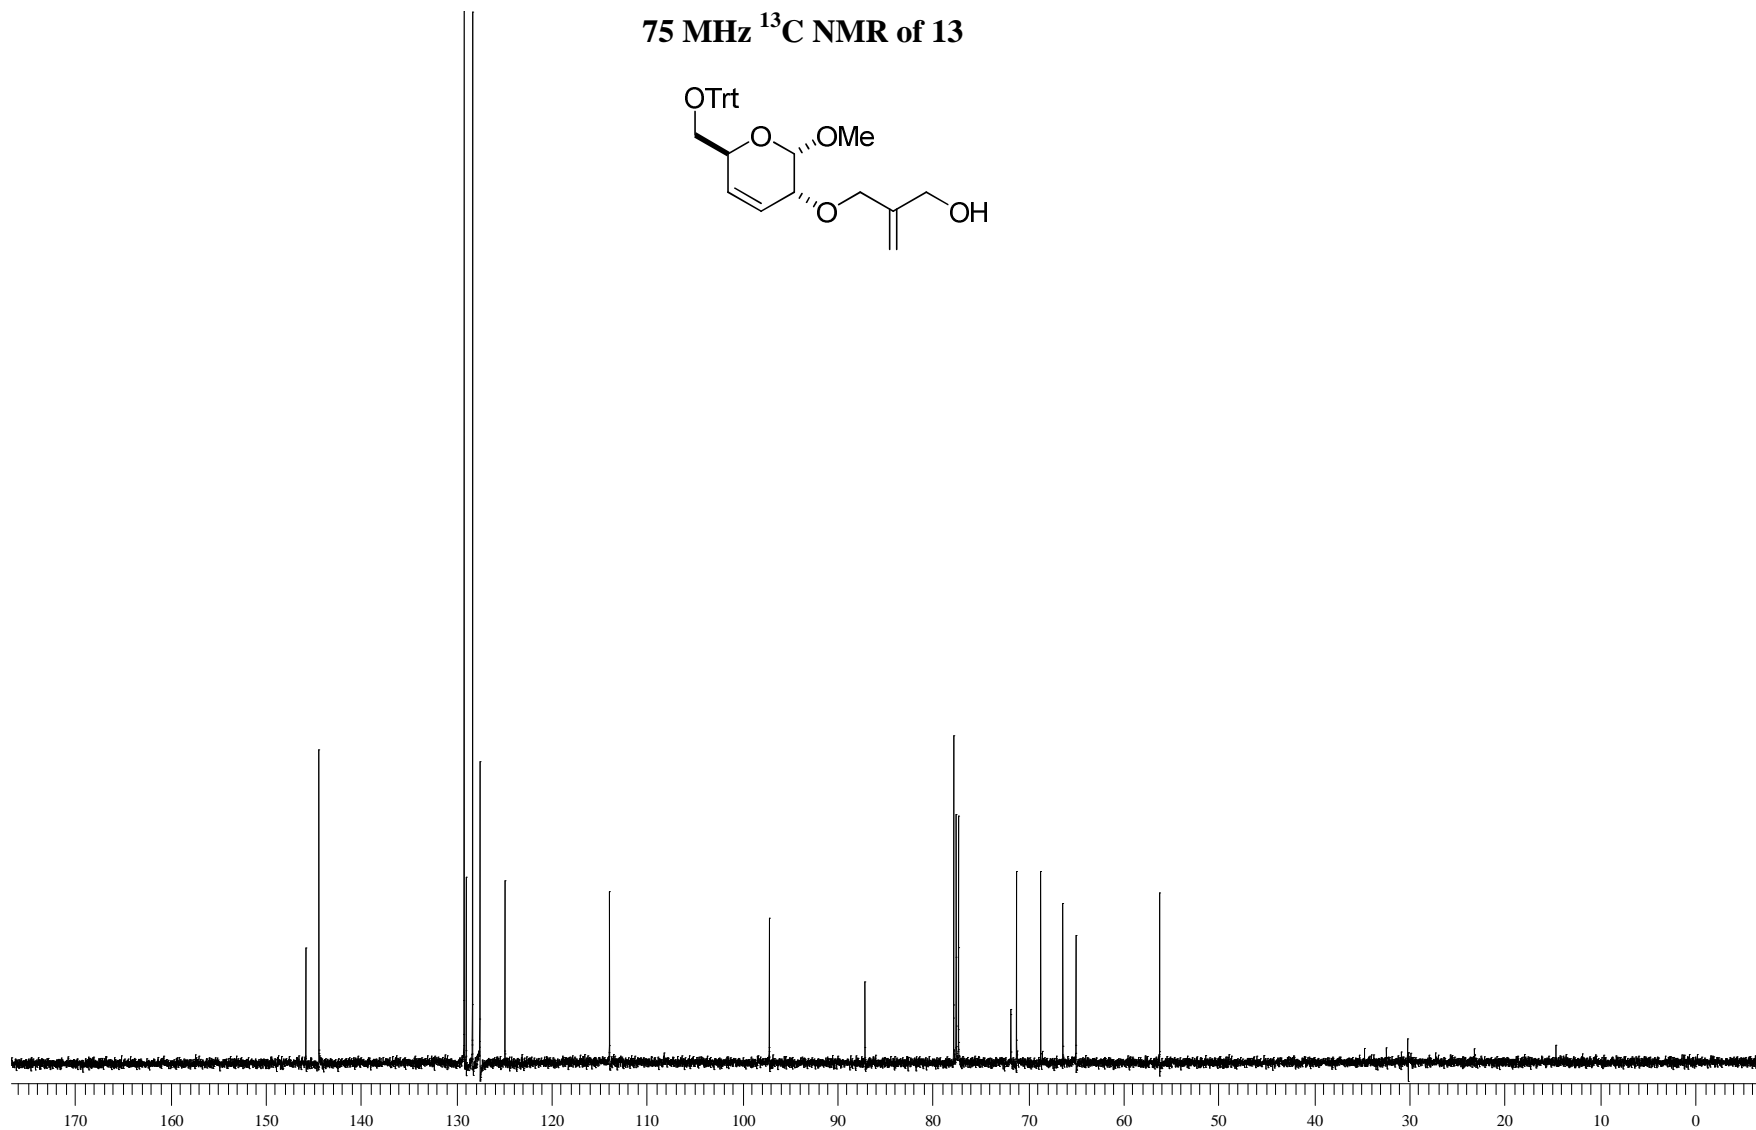



500 MHz  $^1\text{H}$  NMR of 15

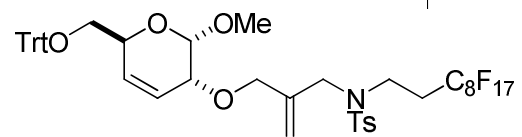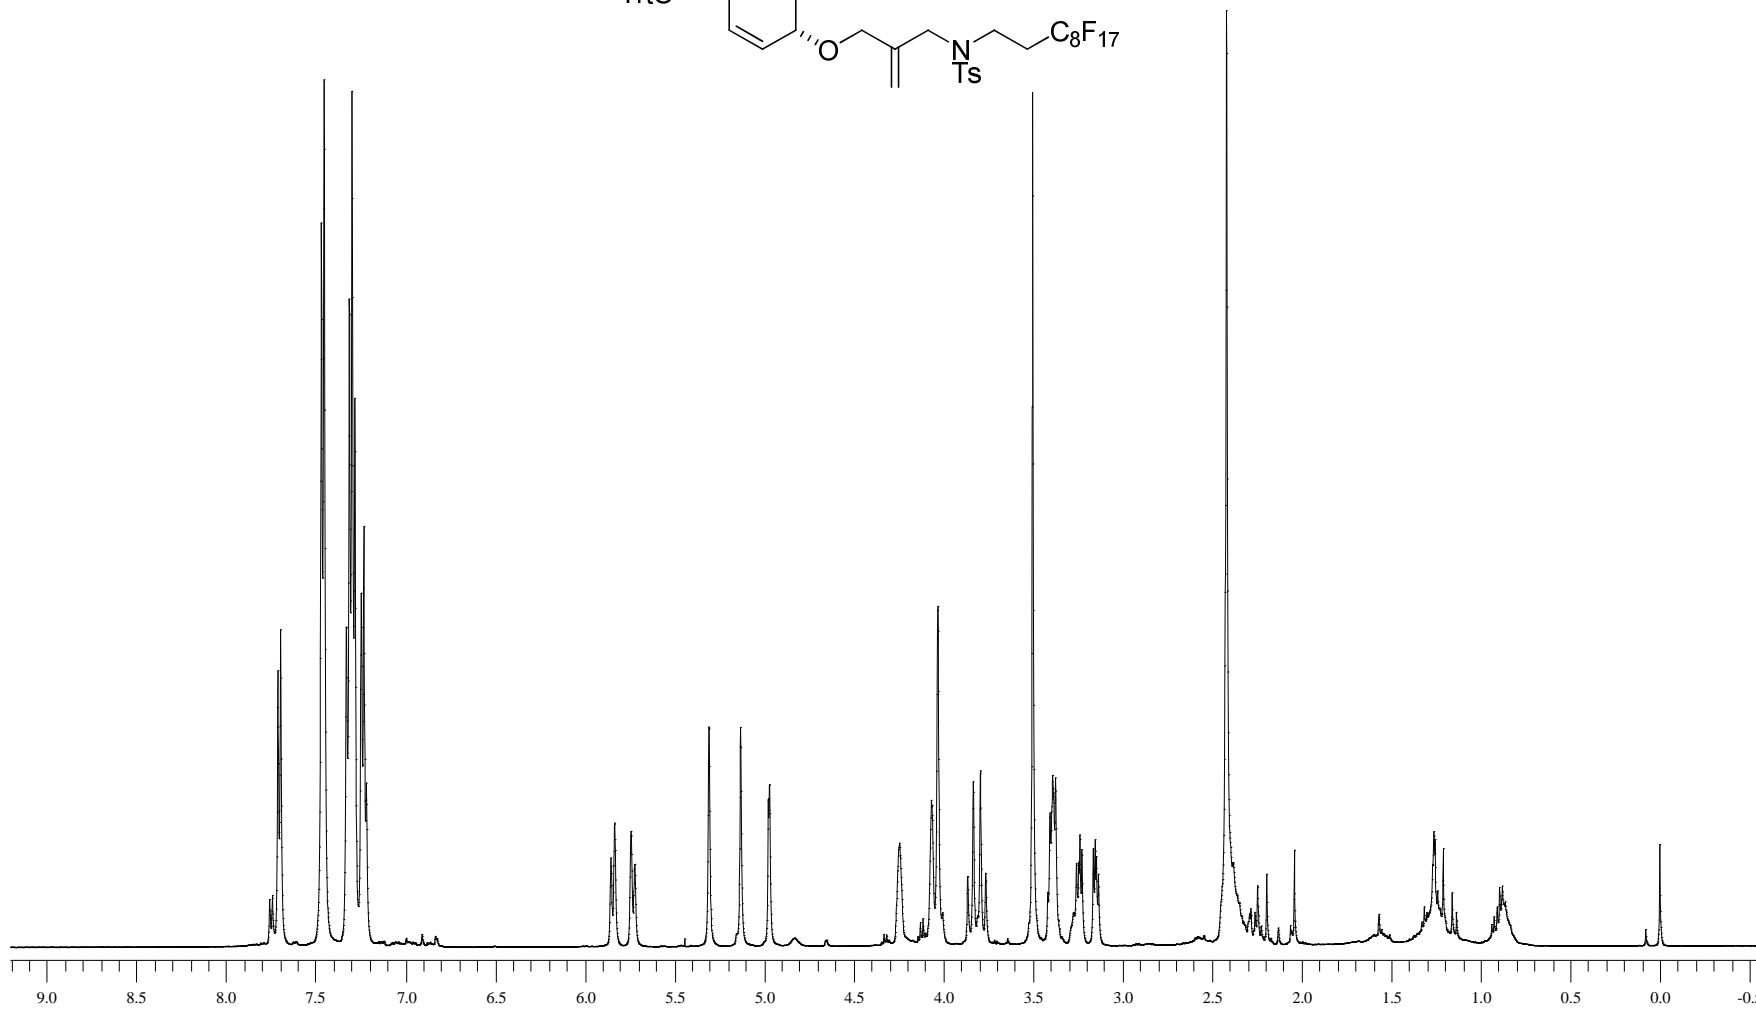

75 MHz  $^{13}\text{C}$  NMR of 15

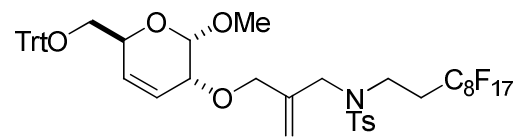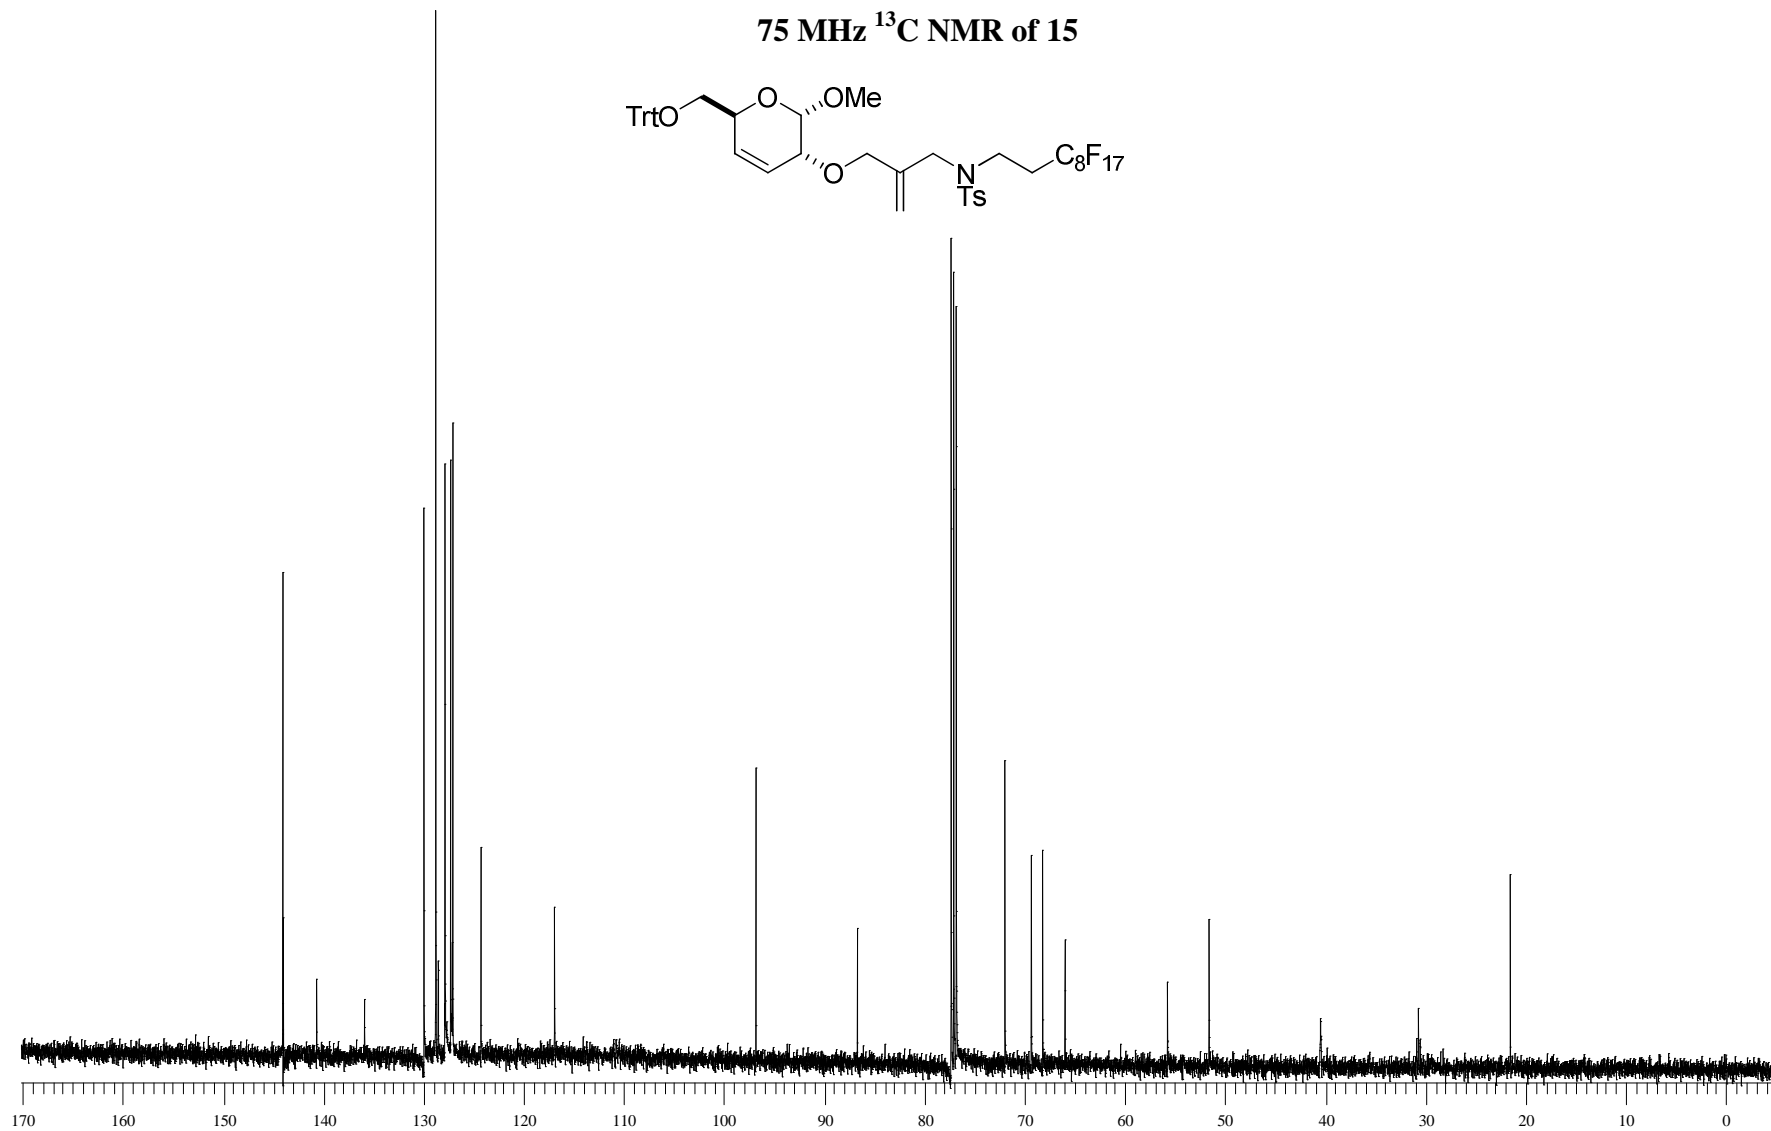

500 MHz  $^1\text{H}$  NMR of 16

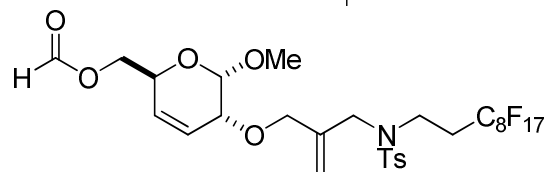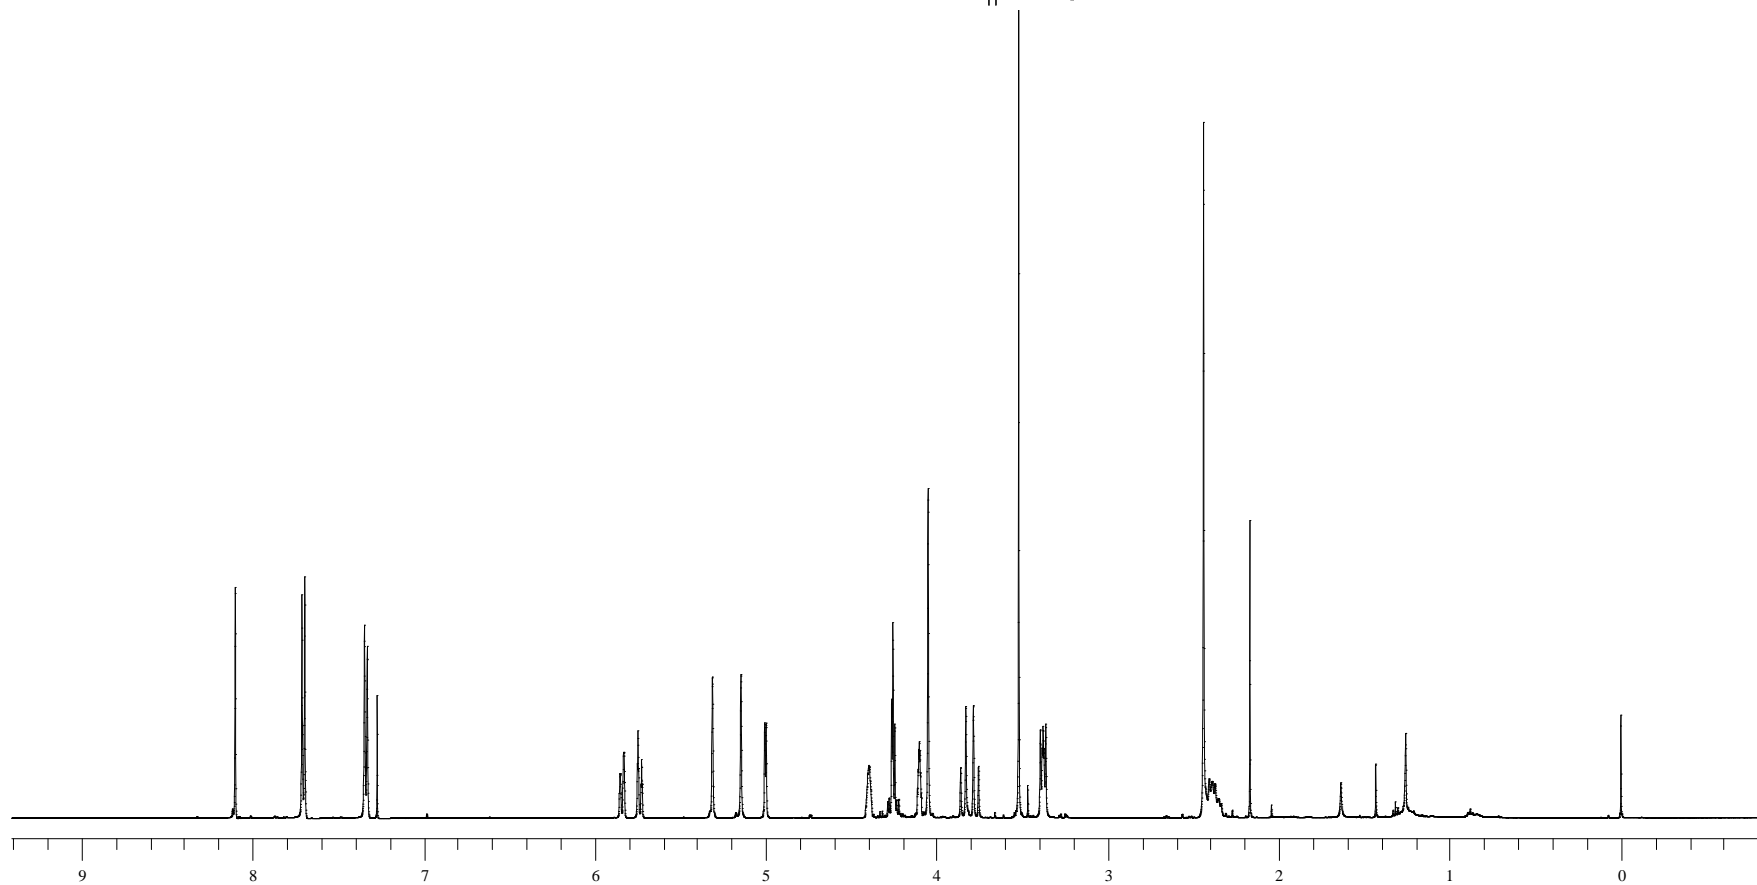

500 MHz  $^1\text{H}$  NMR of 16

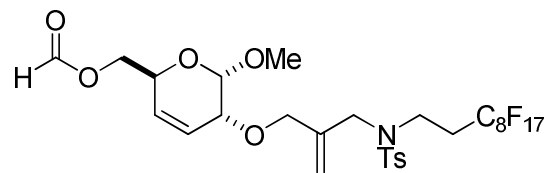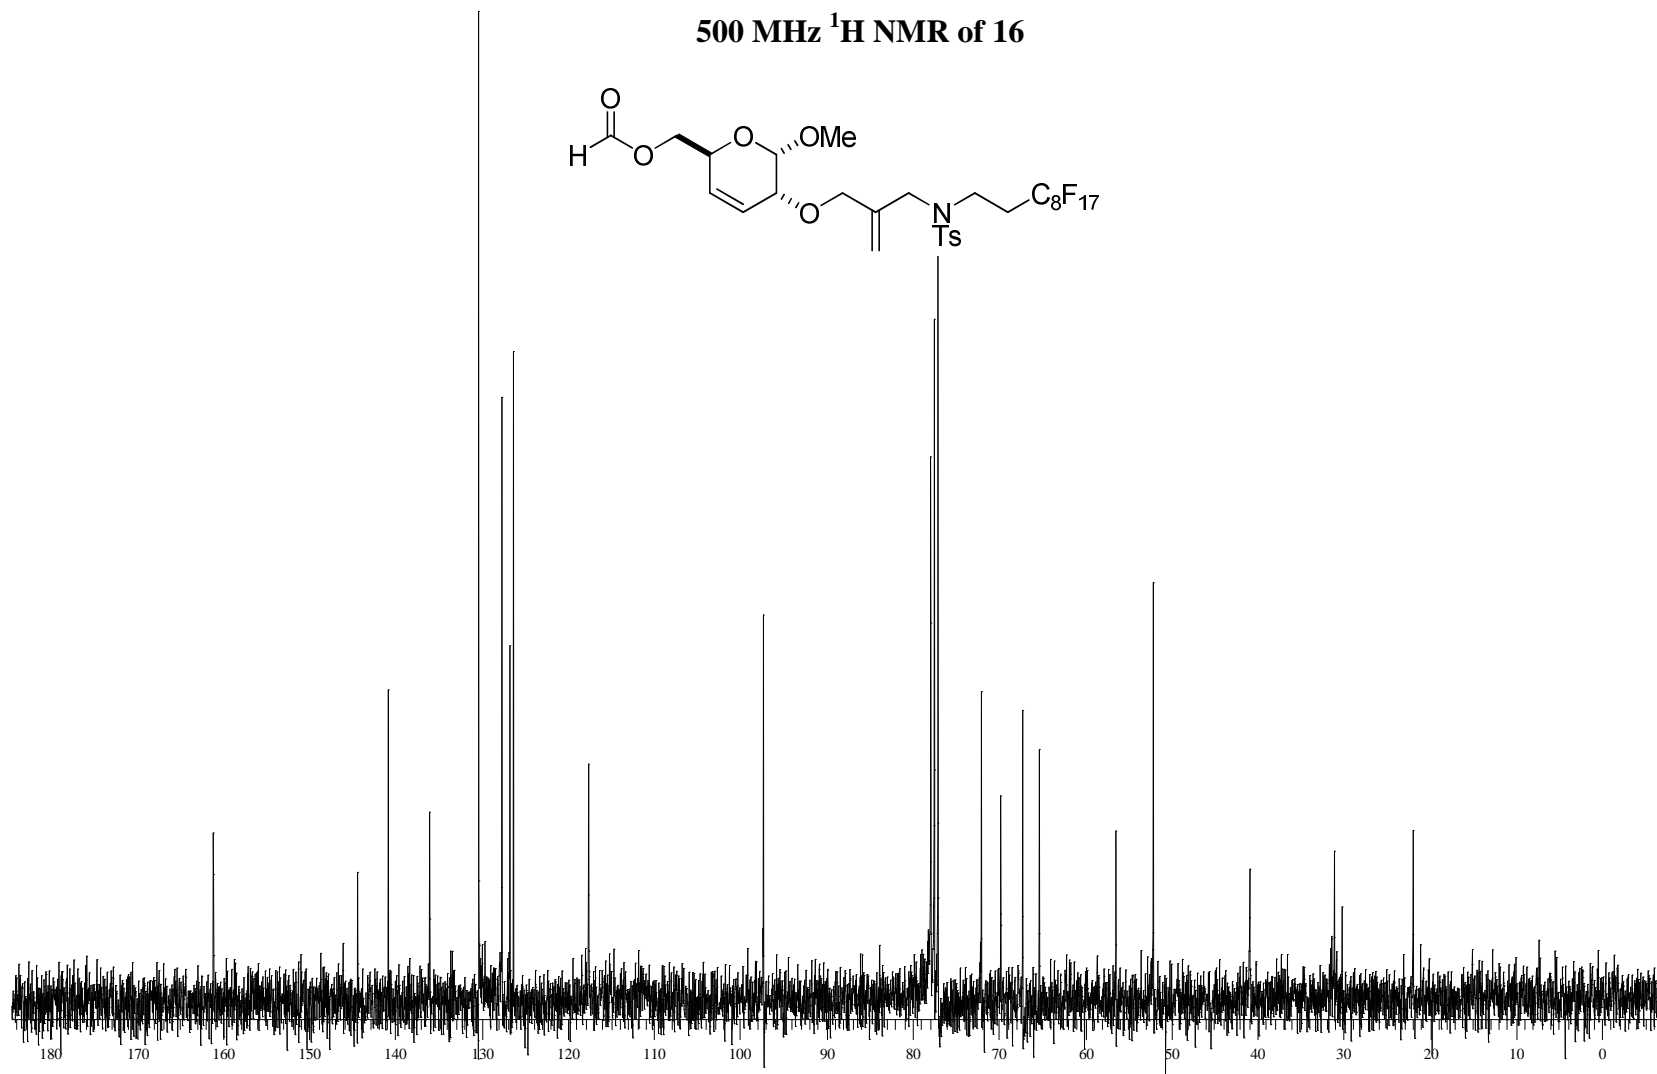

500 MHz  $^1\text{H}$  NMR of 1

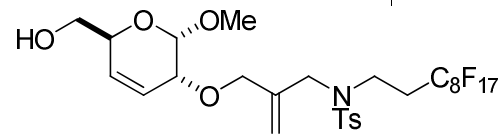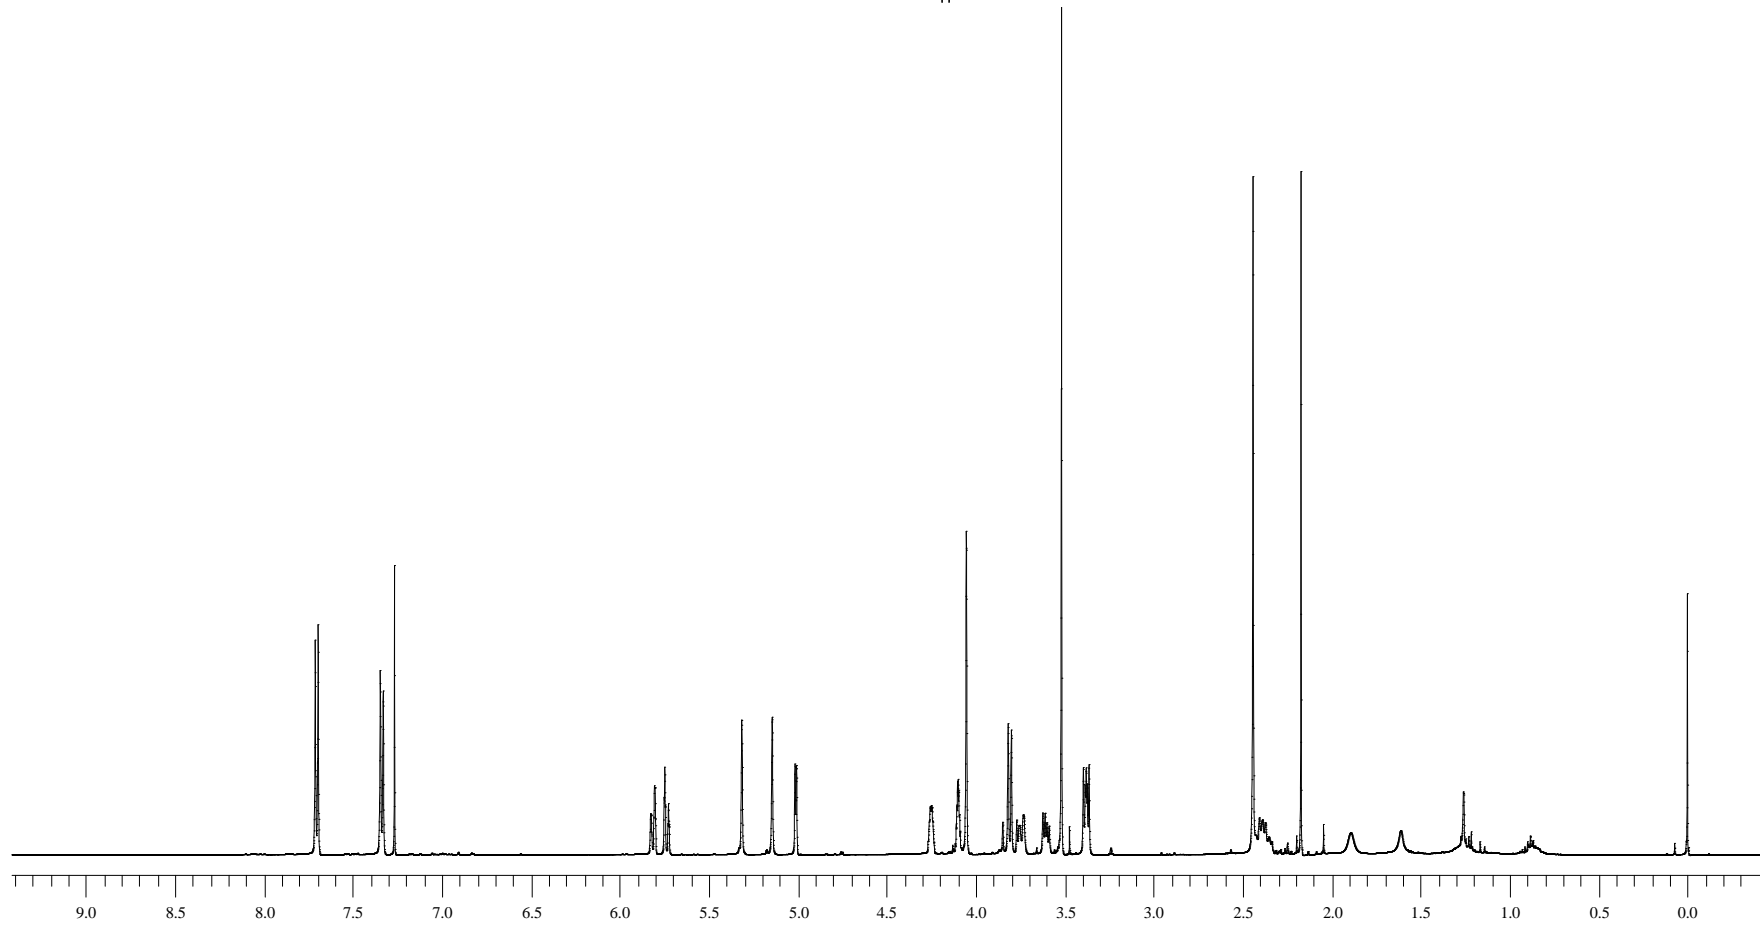

500 MHz  $^1\text{H}$  NMR of 1

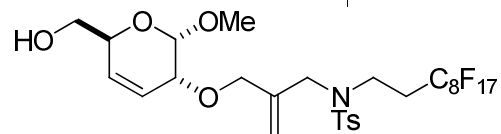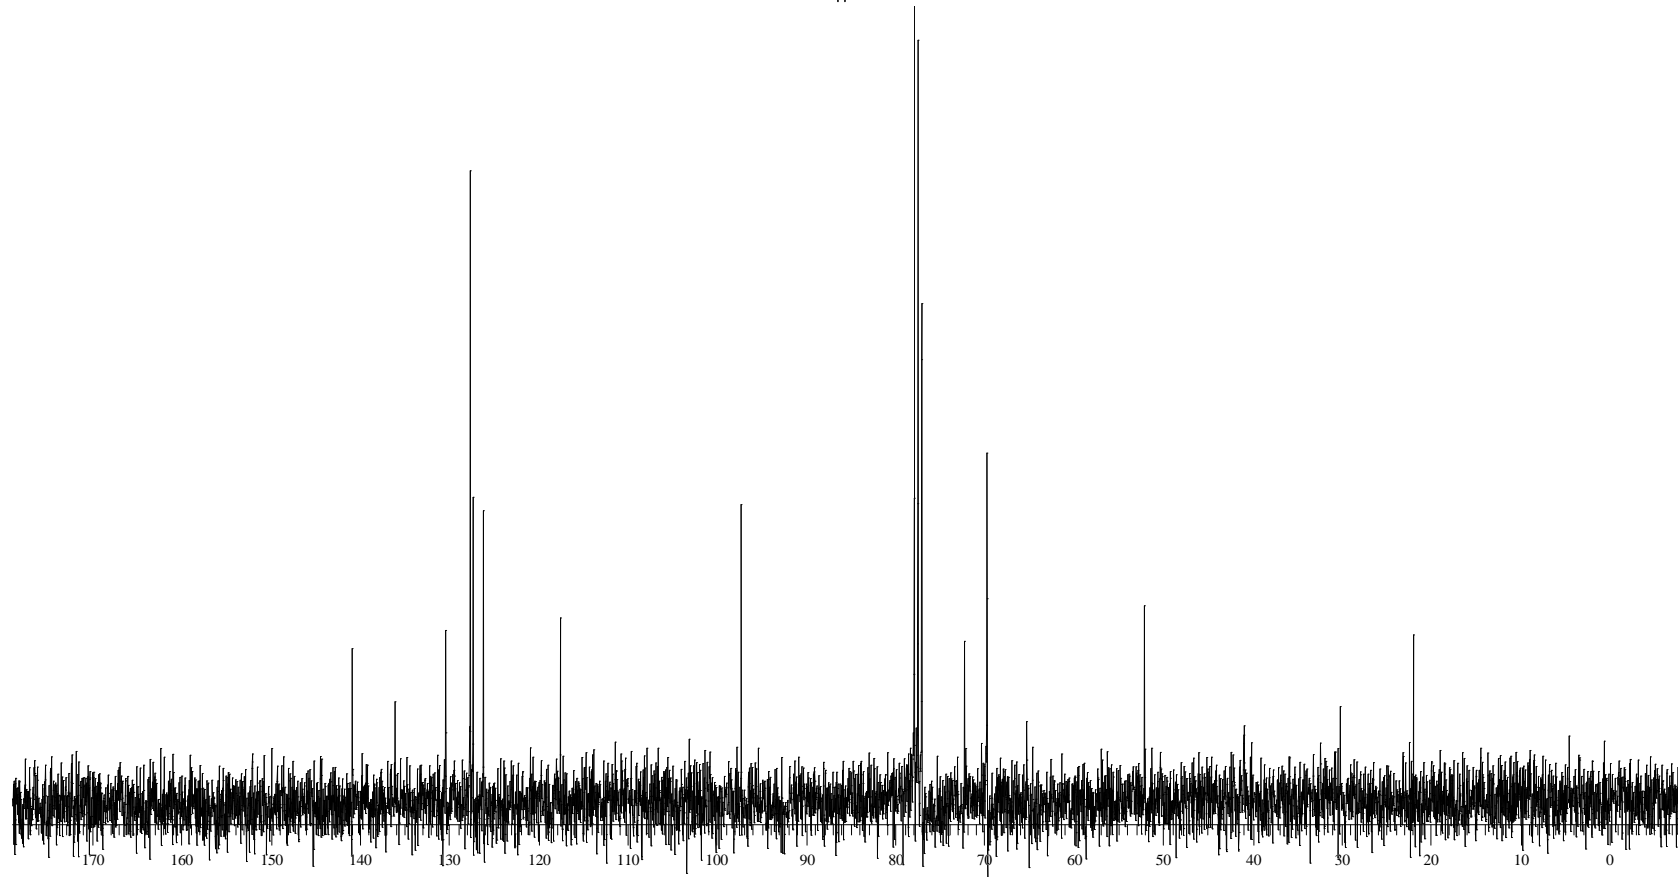

500 MHz  $^1\text{H}$  NMR of 18

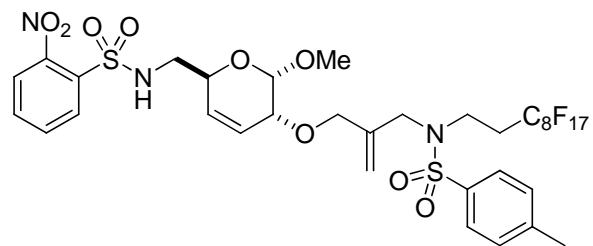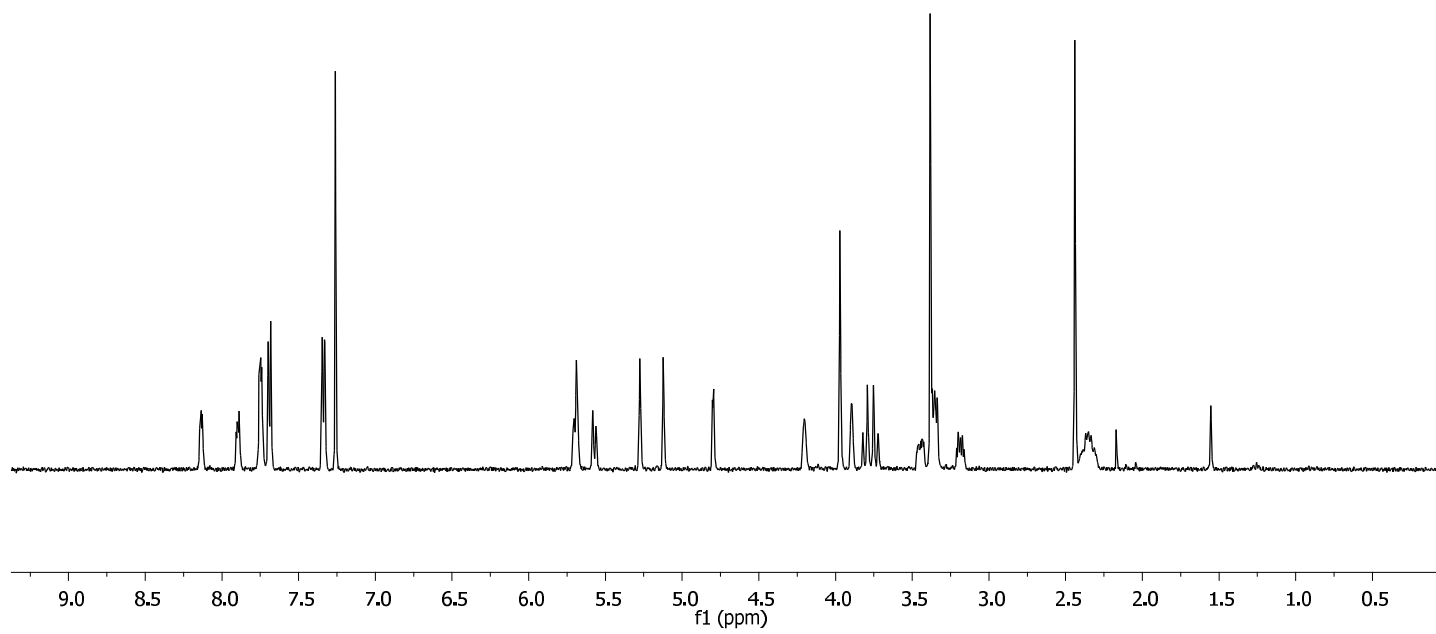

75 MHz  $^{13}\text{C}$  NMR of 18

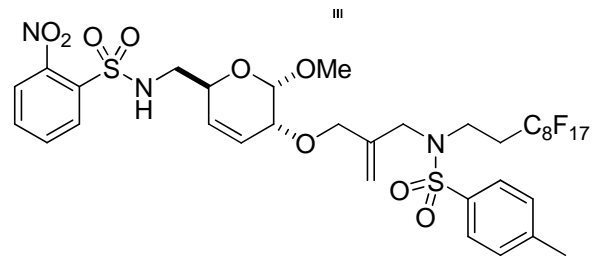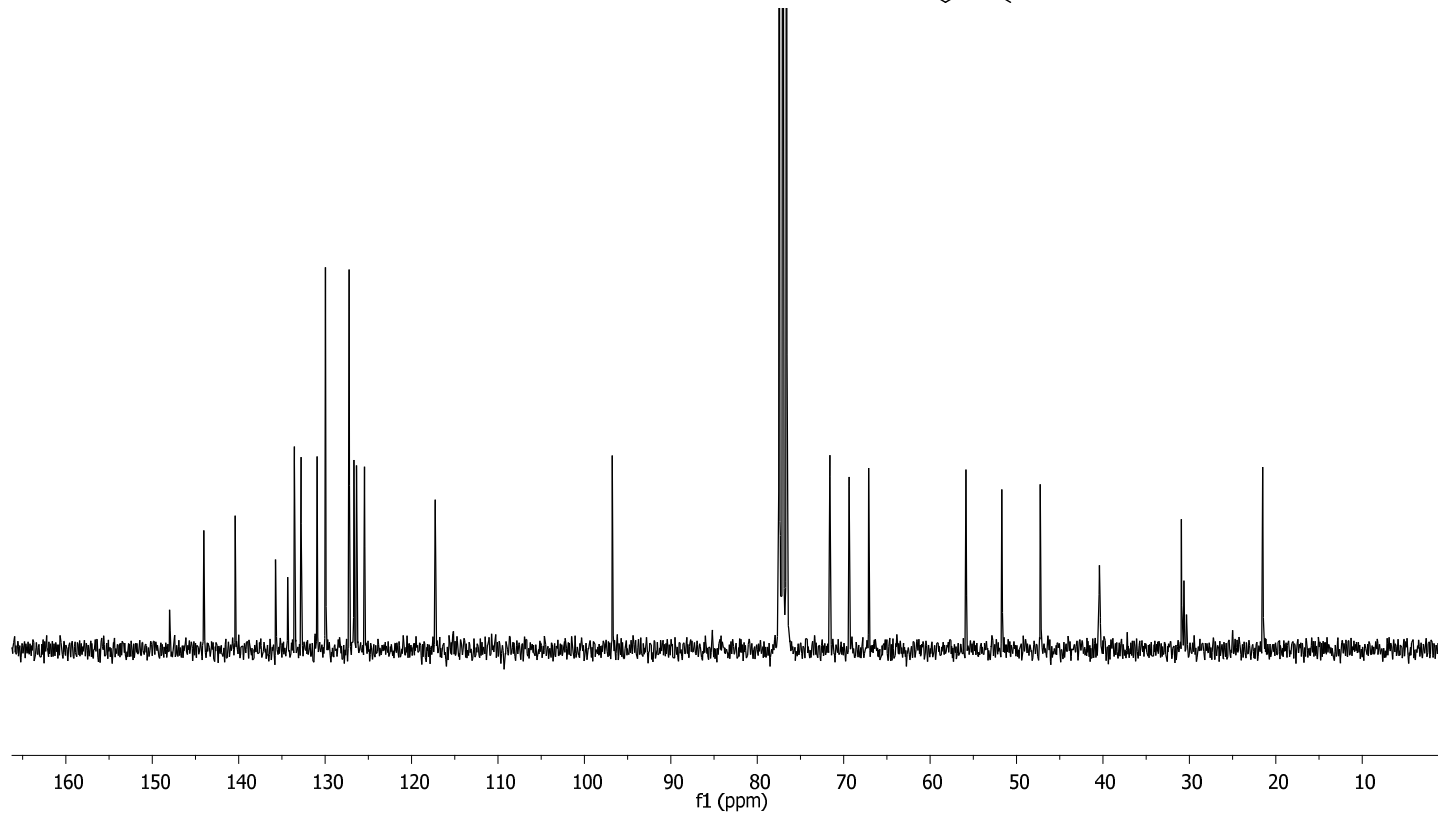

Supplement: ol802848j_si_001.pdf [file ol802848j_si_001.pdf]
